# Supplementary material
Source: Research Square preprint supplement (doi:10.21203/rs.3.rs-9575475/v1)
Supplement: Supplementary file 1 [file 7f8ef144c6666b85eb2f3050.xlsx]

## Sheet: Sheet1
id	year	treatdate	treat_i	period_it	D_it	合理化水平	高级化指数	市场化指数	gdp指数	gdp(万元)	产业结构	年末总人口(万人)	城镇化率	地方财政一般预算内收入(万元)	科学支出比重	教育支出比重	人力资本水平	固定资产投资	工业废水排放量（万吨）	工业二氧化硫排放量（吨）	工业烟尘去除量（吨）	工业烟尘排放量（吨）	工业固体废物综合利用率(%)	城镇生活污水处理率(%)	生活垃圾无害化处理率(%)	互联网宽帶接入用户	绿色全要素生产率	二氧化碳排放量（万吨）	实际使用外资金额(万美元)	人均工资（元）	第三产业就业人数	总就业人数	公共预算支出（万元）	第二产业产值（亿元）	第三产业产值（亿元）	进出口总额（万元）
1	2000	2015	1	0	0	0.230664	6.13042	6.93568	4.78872e+06	0	0.497406	416.978	0.037318		0.0091916	0.200747		0	10271.1	90572.5	1.26821e+06	13196.5	79.549	103.925	46.2109	0	1.01435	448.747	0	1074.79	8.81297	16.3446	0	145.66	0	4.6972e+06
1	2001	2015	1	0	0	0.234132	6.15394	7.36528	4.43401e+06	0	0.494005	419.543	0.107842		0.00963246	0.199367		0	10003.1	87505.6	1.27285e+06	15020.2	79.4294	96.8013	49.0163	0	1.01335	477.581	3972.74	3869.65	10.3149	23.6229	0	199.72	0	4.87613e+06
1	2002	2015	1	0	0	0.2376	6.17747	7.79488	4.07929e+06	0	0.490604	422.107	0.178366		0.0100733	0.197988		0	9735.21	84438.6	1.2775e+06	16844	79.3098	89.6775	51.8216	0	1.01235	506.414	10872.8	6664.52	11.8167	30.9011	0	253.781	0	5.05507e+06
1	2003	2015	1	0	0	0.241067	6.20099	8.22447	3.72458e+06	0	0.487203	424.672	0.248891		0.0105142	0.196608		0	9467.28	81371.7	1.28215e+06	18667.7	79.1902	82.5536	54.627	0	1.01135	535.248	17772.9	9459.38	13.3186	38.1793	0	307.842	64.1668	5.23401e+06
1	2004	2015	1	0	0	0.244535	6.22451	8.65407	3.36987e+06	179105	0.483802	427.236	0.319415		0.0109551	0.195229		0	9199.35	78304.8	1.2868e+06	20491.4	79.0706	75.4298	57.4323	48.3346	1.01034	564.082	24673	12254.2	14.8205	45.4575	0	361.902	136.808	5.41295e+06
1	2005	2015	1	0	0	0.248003	6.24803	9.08367	3.01516e+06	401625	0.4804	429.801	0.389939		0.0113959	0.193849		9061.56	8931.41	75237.8	1.29144e+06	22315.1	78.951	68.306	60.2376	121.175	1.00934	592.915	31573.1	15049.1	16.3224	52.7358	0	415.963	209.449	5.59189e+06
1	2006	2015	1	0	0	0.253169	6.29239	9.59896	113.307	869800	0.454064	417.797	0.347571		0.0118368	0.192469		35061.5	7984.18	69062.6	797507	28520.8	76.1273	45.0736	59.8051	245.178	0.999917	581.313	36324	17844	17.8242	60.014	0	470.024	282.091	5.77083e+06
1	2007	2015	1	0	0	0.250735	6.30615	9.77713	9.75467e+06	1051000	0.464822	422.501	0.330949		0.0122776	0.19109		43879.3	8517.05	67749.6	840498	24525.4	77.0793	50.0784	65.4194	276.387	0.978551	670.163	43462.3	21081	20.34	71.5942	0	480.548	379.017	5.80806e+06
1	2008	2015	1	0	0	0.260135	6.30996	10.3846	112.221	756300	0.473758	427.241	0.335398		0.0127185	0.18971		54856.6	8134.07	63771.2	1.00161e+06	21683.4	78.7751	56.2903	69.1482	334.449	1.03909	717.338	52754.7	23168.2	20.9601	74.9442	0	548.718	422.795	5.88064e+06
1	2009	2015	1	0	0	0.265596	6.36275	10.6329	111.902	1095900	0.463345	430.016	0.999679		0.0131594	0.188331		72444.9	7705.22	58580	1.03232e+06	18974.5	78.8716	59.3137	71.8611	404.53	0.997838	694.423	55218.9	26222.7	21.7966	79.7971	0	597.015	500.241	5.44026e+06
1	2010	2015	1	0	0	0.261458	6.363	11.4344	113.432	1327600	0.470287	435.911	0.99299		0.0130497	0.175949		89042.4	7935.92	59520	1.22768e+06	18776.1	82.141	70.4389	77.0939	453.781	1.04566	741.85	64029.4	28720.6	22.5665	84.324	0	703.665	568.741	7.03306e+06
1	2011	2015	1	0	0	0.26709	6.36238	11.5461	112.374	1684800	0.486776	550.873	0.990383		0.0141463	0.184687		99551.2	7734.08	65414.5	2.60249e+06	51294.5	76.5802	0	79.3297	537.299	0.963047	743.569	75882.7	32145	24.2132	93.1664	2.18593e+06	806.969	639.637	7.18408e+06
1	2012	2015	1	0	0	0.266736	6.37823	12.3199	110.769	2037400	0.476428	441.512	0.990127		0.0146282	0.201541		121777	7274.26	59491.8	2.26928e+06	48979.9	78.3541	0	83.5111	602.098	1.05536	791.278	86874.7	34629.8	26.4125	102.345	2.49915e+06	862.677	693.859	7.25244e+06
1	2013	2015	1	0	0	0.28564	6.40233	12.6046	109.596	2339900	0.470595	441.241	0.992699		0.0154208	0.186375		143483	7086.1	53915.9	2.3351e+06	38751.7	81.4615	0	74.6039	696.352	0.988625	852.035	95421	37252.1	30.2453	116.211	2.84314e+06	902.384	777.188	7.44149e+06
1	2014	2015	1	0	0	0.276394	6.45332	12.9568	108.165	2477900	0.457124	445.286	0.990786		0.0162252	0.178112		162107	6782.45	55073	2.40613e+06	43354.9	82.5167	0	89.8465	758.307	0.967095	880.639	100278	39517.6	30.7268	120.152	2.92794e+06	922.575	861.239	7.5993e+06
1	2015	2015	1	1	1	0.293633	6.50189	13.2789	107.591	2650400	0.428902	444.56	0.99673		0.0147798	0.177048		179568	6572.47	48701.5	0	48312.2	80.1238	0	90.4455	819.73	0.97881	858.07	93665.4	43138.7	32.28	128.96	3.37529e+06	917.443	944.597	7.16127e+06
1	2016	2015	1	1	1	0.276313	6.54838	13.7397	107.104	2813200	0.413826	440.133	0.97661		0.0162098	0.175976		191845	4836.31	23918.7	0	22658.6	68.5373	0	86.7022	1012.29	1.0226	894.418	98799.9	46281.5	31.3048	128.947	3.58588e+06	931.577	1028.87	6.74937e+06
1	2017	2015	1	1	1	0.289615	6.53029	14.2388	0	3.07187e+06	0.439587	460.576	1.23623		0.0166863	0.177294		207959	5716.24	38434.7	1.34721e+06	44199.8	77.5159	0	93.9017	995.261	0.997311	938.92	114374	48587.5	34.3449	140.074	4.38781e+06	1064.69	1081.15	7.73916e+06
1	2018	2015	1	1	1	0.293083	6.55382	14.6684	0	3.29439e+06	0.436185	463.14	1.30675		0.0171271	0.175915		224534	5448.31	35367.7	1.35186e+06	46023.5	77.3963	0	96.7071	1068.1	0.996309	967.754	121274	51382.3	35.8468	147.353	4.86891e+06	1118.75	1153.79	7.9181e+06
1	2019	2015	1	1	1	0.296551	6.57734	15.098	0	3.51691e+06	0.432784	465.705	1.37728		0.017568	0.174535		241109	5180.38	32300.8	1.35651e+06	47847.2	77.2767	0	99.5124	1140.94	0.995306	996.588	128175	54177.2	37.3487	154.631	5.35002e+06	1172.81	1226.43	8.09704e+06
2	2000	2015	1	0	0	0.230664	6.13042	2.42568	4.78872e+06	0	0.220991	416.978	0.037318		0.0091916	0.200747		0	10271.1	90572.5	1.26821e+06	13196.5	79.549	103.925	46.2109	0	0.985778	448.747	0	1074.79	8.81297	16.3446	0	145.66	0	4.6972e+06
2	2001	2015	1	0	0	0.234132	6.15394	2.96313	4.43401e+06	0	0.228182	419.543	0.107842		0.00963246	0.199367		0	10003.1	87505.6	1.27285e+06	15020.2	79.4294	96.8013	49.0163	0	0.987659	477.581	3972.74	3869.65	10.3149	23.6229	0	199.72	0	4.87613e+06
2	2002	2015	1	0	0	0.2376	6.17747	3.50059	4.07929e+06	0	0.235373	422.107	0.178366		0.0100733	0.197988		0	9735.21	84438.6	1.2775e+06	16844	79.3098	89.6775	51.8216	0	0.989541	506.414	10872.8	6664.52	11.8167	30.9011	0	253.781	0	5.05507e+06
2	2003	2015	1	0	0	0.241067	6.20099	4.03804	3.72458e+06	0	0.242564	424.672	0.248891		0.0105142	0.196608		0	9467.28	81371.7	1.28215e+06	18667.7	79.1902	82.5536	54.627	0	0.991423	535.248	17772.9	9459.38	13.3186	38.1793	0	307.842	64.1668	5.23401e+06
2	2004	2015	1	0	0	0.244535	6.22451	4.5755	3.36987e+06	171286	0.249755	427.236	0.319415		0.0109551	0.195229		0	9199.35	78304.8	1.2868e+06	20491.4	79.0706	75.4298	57.4323	48.3346	0.993305	564.082	24673	12254.2	14.8205	45.4575	0	361.902	136.808	5.41295e+06
2	2005	2015	1	0	0	0.248003	6.24803	5.11295	3.01516e+06	871327	0.256945	429.801	0.389939		0.0113959	0.193849		9061.56	8931.41	75237.8	1.29144e+06	22315.1	78.951	68.306	60.2376	121.175	0.995187	592.915	31573.1	15049.1	16.3224	52.7358	0	415.963	209.449	5.59189e+06
2	2006	2015	1	0	0	0.253169	6.29239	5.64875	113.307	1937736	0.249	417.797	0.347571		0.0118368	0.192469		35061.5	7984.18	69062.6	797507	28520.8	76.1273	45.0736	59.8051	245.178	0.982498	581.313	36324	17844	17.8242	60.014	0	470.024	282.091	5.77083e+06
2	2007	2015	1	0	0	0.250735	6.30615	6.22237	9.75467e+06	2315179	0.267	422.501	0.330949		0.0122776	0.19109		43879.3	8517.05	67749.6	840498	24525.4	77.0793	50.0784	65.4194	276.387	1.03708	670.163	43462.3	21081	20.34	71.5942	0	480.548	379.017	5.80806e+06
2	2008	2015	1	0	0	0.260135	6.30996	6.67481	112.221	2731177	0.264	427.241	0.335398		0.0127185	0.18971		54856.6	8134.07	63771.2	1.00161e+06	21683.4	78.7751	56.2903	69.1482	334.449	0.972653	717.338	52754.7	23168.2	20.9601	74.9442	0	548.718	422.795	5.88064e+06
2	2009	2015	1	0	0	0.265596	6.36275	7.42284	111.902	3204457	0.284	430.016	0.999679		0.0131594	0.188331		72444.9	7705.22	58580	1.03232e+06	18974.5	78.8716	59.3137	71.8611	404.53	0.985399	694.423	55218.9	26222.7	21.7966	79.7971	0	597.015	500.241	5.44026e+06
2	2010	2015	1	0	0	0.261458	6.363	7.67337	113.432	3961175	0.309	435.911	0.99299		0.0130497	0.175949		89042.4	7935.92	59520	1.22768e+06	18776.1	82.141	70.4389	77.0939	453.781	1.00708	741.85	64029.4	28720.6	22.5665	84.324	0	703.665	568.741	7.03306e+06
2	2011	2015	1	0	0	0.26709	6.36238	8.51665	112.374	5061427	0.332	550.873	0.990383		0.0141463	0.184687		99551.2	7734.08	65414.5	2.60249e+06	51294.5	76.5802	0	79.3297	537.299	1.04701	743.569	75882.7	32145	24.2132	93.1664	2.18593e+06	806.969	639.637	7.18408e+06
2	2012	2015	1	0	0	0.266736	6.37823	8.88191	110.769	6121381	0.328	441.512	0.990127		0.0146282	0.201541		121777	7274.26	59491.8	2.26928e+06	48979.9	78.3541	0	83.5111	602.098	1.01955	791.278	86874.7	34629.8	26.4125	102.345	2.49915e+06	862.677	693.859	7.25244e+06
2	2013	2015	1	0	0	0.28564	6.40233	9.07833	109.596	6926045	0.315	441.241	0.992699		0.0154208	0.186375		143483	7086.1	53915.9	2.3351e+06	38751.7	81.4615	0	74.6039	696.352	1.00441	852.035	95421	37252.1	30.2453	116.211	2.84314e+06	902.384	777.188	7.44149e+06
2	2014	2015	1	0	0	0.276394	6.45332	9.78475	108.165	7498888	0.317	445.286	0.990786		0.0162252	0.178112		162107	6782.45	55073	2.40613e+06	43354.9	82.5167	0	89.8465	758.307	0.964639	880.639	100278	39517.6	30.7268	120.152	2.92794e+06	922.575	861.239	7.5993e+06
2	2015	2015	1	1	1	0.293633	6.50189	10.6496	107.591	8101842	0.316	444.56	0.99673		0.0147798	0.177048		179568	6572.47	48701.5	0	48312.2	80.1238	0	90.4455	819.73	1.01336	858.07	93665.4	43138.7	32.28	128.96	3.37529e+06	917.443	944.597	7.16127e+06
2	2016	2015	1	1	1	0.276313	6.54838	11.1611	107.104	7928010	0.32	440.133	0.97661		0.0162098	0.175976		191845	4836.31	23918.7	0	22658.6	68.5373	0	86.7022	1012.29	1.03759	894.418	98799.9	46281.5	31.3048	128.947	3.58588e+06	931.577	1028.87	6.74937e+06
2	2017	2015	1	1	1	0.289615	6.53029	11.5624	0	9.27182e+06	0.343236	460.576	1.23623		0.0166863	0.177294		207959	5716.24	38434.7	1.34721e+06	44199.8	77.5159	0	93.9017	995.261	1.01777	938.92	114374	48587.5	34.3449	140.074	4.38781e+06	1064.69	1081.15	7.73916e+06
2	2018	2015	1	1	1	0.293083	6.55382	12.0999	0	9.97186e+06	0.350427	463.14	1.30675		0.0171271	0.175915		224534	5448.31	35367.7	1.35186e+06	46023.5	77.3963	0	96.7071	1068.1	1.01965	967.754	121274	51382.3	35.8468	147.353	4.86891e+06	1118.75	1153.79	7.9181e+06
2	2019	2015	1	1	1	0.296551	6.57734	12.6373	0	1.06719e+07	0.357618	465.705	1.37728		0.017568	0.174535		241109	5180.38	32300.8	1.35651e+06	47847.2	77.2767	0	99.5124	1140.94	1.02153	996.588	128175	54177.2	37.3487	154.631	5.35002e+06	1172.81	1226.43	8.09704e+06
3	2000	2015	1	0	0	0.230664	6.13042	5.60413	4.78872e+06	0	0.497406	416.978	0.037318		0.0091916	0.200747		0	10271.1	90572.5	1.26821e+06	13196.5	79.549	103.925	46.2109	0	1.05264	448.747	0	1074.79	8.81297	16.3446	0	145.66	0	4.6972e+06
3	2001	2015	1	0	0	0.234132	6.15394	6.13506	4.43401e+06	122046	0.494005	419.543	0.107842		0.00963246	0.199367		0	10003.1	87505.6	1.27285e+06	15020.2	79.4294	96.8013	49.0163	0	1.0489	477.581	3972.74	3869.65	10.3149	23.6229	0	199.72	0	4.87613e+06
3	2002	2015	1	0	0	0.2376	6.17747	6.666	4.07929e+06	397991	0.490604	422.107	0.178366		0.0100733	0.197988		0	9735.21	84438.6	1.2775e+06	16844	79.3098	89.6775	51.8216	0	1.04516	506.414	10872.8	6664.52	11.8167	30.9011	0	253.781	0	5.05507e+06
3	2003	2015	1	0	0	0.241067	6.20099	7.19693	3.72458e+06	673935	0.487203	424.672	0.248891		0.0105142	0.196608		0	9467.28	81371.7	1.28215e+06	18667.7	79.1902	82.5536	54.627	0	1.04141	535.248	17772.9	9459.38	13.3186	38.1793	0	307.842	64.1668	5.23401e+06
3	2004	2015	1	0	0	0.244535	6.22451	7.72787	3.36987e+06	949880	0.483802	427.236	0.319415		0.0109551	0.195229		0	9199.35	78304.8	1.2868e+06	20491.4	79.0706	75.4298	57.4323	48.3346	1.03767	564.082	24673	12254.2	14.8205	45.4575	0	361.902	136.808	5.41295e+06
3	2005	2015	1	0	0	0.248003	6.24803	8.2588	3.01516e+06	1.22582e+06	0.4804	429.801	0.389939		0.0113959	0.193849		9061.56	8931.41	75237.8	1.29144e+06	22315.1	78.951	68.306	60.2376	121.175	1.03392	592.915	31573.1	15049.1	16.3224	52.7358	0	415.963	209.449	5.59189e+06
3	2006	2015	1	0	0	0.253169	6.29239	8.35915	113.307	860318	0.454064	417.797	0.347571		0.0118368	0.192469		35061.5	7984.18	69062.6	797507	28520.8	76.1273	45.0736	59.8051	245.178	1.03785	581.313	36324	17844	17.8242	60.014	0	470.024	282.091	5.77083e+06
3	2007	2015	1	0	0	0.250735	6.30615	9.3298	9.75467e+06	1113900	0.464822	422.501	0.330949		0.0122776	0.19109		43879.3	8517.05	67749.6	840498	24525.4	77.0793	50.0784	65.4194	276.387	0.978159	670.163	43462.3	21081	20.34	71.5942	0	480.548	379.017	5.80806e+06
3	2008	2015	1	0	0	0.260135	6.30996	10.1212	112.221	1817900	0.473758	427.241	0.335398		0.0127185	0.18971		54856.6	8134.07	63771.2	1.00161e+06	21683.4	78.7751	56.2903	69.1482	334.449	1.04655	717.338	52754.7	23168.2	20.9601	74.9442	0	548.718	422.795	5.88064e+06
3	2009	2015	1	0	0	0.265596	6.36275	10.826	111.902	2451100	0.463345	430.016	0.999679		0.0131594	0.188331		72444.9	7705.22	58580	1.03232e+06	18974.5	78.8716	59.3137	71.8611	404.53	1.04527	694.423	55218.9	26222.7	21.7966	79.7971	0	597.015	500.241	5.44026e+06
3	2010	2015	1	0	0	0.261458	6.363	10.9166	113.432	3058900	0.470287	435.911	0.99299		0.0130497	0.175949		89042.4	7935.92	59520	1.22768e+06	18776.1	82.141	70.4389	77.0939	453.781	1.02715	741.85	64029.4	28720.6	22.5665	84.324	0	703.665	568.741	7.03306e+06
3	2011	2015	1	0	0	0.26709	6.36238	11.2764	112.374	3926300	0.486776	550.873	0.990383		0.0141463	0.184687		99551.2	7734.08	65414.5	2.60249e+06	51294.5	76.5802	0	79.3297	537.299	0.979692	743.569	75882.7	32145	24.2132	93.1664	2.18593e+06	806.969	639.637	7.18408e+06
3	2012	2015	1	0	0	0.266736	6.37823	12.24	110.769	4257600	0.476428	441.512	0.990127		0.0146282	0.201541		121777	7274.26	59491.8	2.26928e+06	48979.9	78.3541	0	83.5111	602.098	1.00366	791.278	86874.7	34629.8	26.4125	102.345	2.49915e+06	862.677	693.859	7.25244e+06
3	2013	2015	1	0	0	0.28564	6.40233	12.3461	109.596	4435100	0.470595	441.241	0.992699		0.0154208	0.186375		143483	7086.1	53915.9	2.3351e+06	38751.7	81.4615	0	74.6039	696.352	1.04405	852.035	95421	37252.1	30.2453	116.211	2.84314e+06	902.384	777.188	7.44149e+06
3	2014	2015	1	0	0	0.276394	6.45332	12.702	108.165	3126300	0.457124	445.286	0.990786		0.0162252	0.178112		162107	6782.45	55073	2.40613e+06	43354.9	82.5167	0	89.8465	758.307	0.966537	880.639	100278	39517.6	30.7268	120.152	2.92794e+06	922.575	861.239	7.5993e+06
3	2015	2015	1	1	1	0.293633	6.50189	13.4437	107.591	3225800	0.428902	444.56	0.99673		0.0147798	0.177048		179568	6572.47	48701.5	0	48312.2	80.1238	0	90.4455	819.73	1.02945	858.07	93665.4	43138.7	32.28	128.96	3.37529e+06	917.443	944.597	7.16127e+06
3	2016	2015	1	1	1	0.276313	6.54838	14.3274	107.104	3423200	0.413826	440.133	0.97661		0.0162098	0.175976		191845	4836.31	23918.7	0	22658.6	68.5373	0	86.7022	1012.29	0.967624	894.418	98799.9	46281.5	31.3048	128.947	3.58588e+06	931.577	1028.87	6.74937e+06
3	2017	2015	1	1	1	0.289615	6.53029	14.63	0	4.53716e+06	0.439587	460.576	1.23623		0.0166863	0.177294		207959	5716.24	38434.7	1.34721e+06	44199.8	77.5159	0	93.9017	995.261	0.988986	938.92	114374	48587.5	34.3449	140.074	4.38781e+06	1064.69	1081.15	7.73916e+06
3	2018	2015	1	1	1	0.293083	6.55382	15.1609	0	4813105	0.436185	463.14	1.30675		0.0171271	0.175915		224534	5448.31	35367.7	1.35186e+06	46023.5	77.3963	0	96.7071	1068.1	0.985242	967.754	121274	51382.3	35.8468	147.353	4.86891e+06	1118.75	1153.79	7.9181e+06
3	2019	2015	1	1	1	0.296551	6.57734	15.6919	0	5.08905e+06	0.432784	465.705	1.37728		0.017568	0.174535		241109	5180.38	32300.8	1.35651e+06	47847.2	77.2767	0	99.5124	1140.94	0.981497	996.588	128175	54177.2	37.3487	154.631	5.35002e+06	1172.81	1226.43	8.09704e+06
4	2000	2015	1	0	0	0.230664	6.13042	2.06097	4.78872e+06	0	0.517473	416.978	0.037318		0.0091916	0.200747		0	10271.1	90572.5	1.26821e+06	13196.5	79.549	103.925	46.2109	0	1.00125	448.747	0	1074.79	8.81297	16.3446	0	145.66	0	4.6972e+06
4	2001	2015	1	0	0	0.234132	6.15394	2.46261	4.43401e+06	35109.2	0.509545	419.543	0.107842		0.00963246	0.199367		0	10003.1	87505.6	1.27285e+06	15020.2	79.4294	96.8013	49.0163	0	1.00057	477.581	3972.74	3869.65	10.3149	23.6229	0	199.72	0	4.87613e+06
4	2002	2015	1	0	0	0.2376	6.17747	2.86425	4.07929e+06	193202	0.501618	422.107	0.178366		0.0100733	0.197988		0	9735.21	84438.6	1.2775e+06	16844	79.3098	89.6775	51.8216	0	0.999883	506.414	10872.8	6664.52	11.8167	30.9011	0	253.781	0	5.05507e+06
4	2003	2015	1	0	0	0.241067	6.20099	3.2659	3.72458e+06	351295	0.493691	424.672	0.248891		0.0105142	0.196608		0	9467.28	81371.7	1.28215e+06	18667.7	79.1902	82.5536	54.627	0	0.999197	535.248	17772.9	9459.38	13.3186	38.1793	0	307.842	64.1668	5.23401e+06
4	2004	2015	1	0	0	0.244535	6.22451	3.66754	3.36987e+06	509387	0.485764	427.236	0.319415		0.0109551	0.195229		0	9199.35	78304.8	1.2868e+06	20491.4	79.0706	75.4298	57.4323	48.3346	0.998512	564.082	24673	12254.2	14.8205	45.4575	0	361.902	136.808	5.41295e+06
4	2005	2015	1	0	0	0.248003	6.24803	4.06918	3.01516e+06	667480	0.477836	429.801	0.389939		0.0113959	0.193849		9061.56	8931.41	75237.8	1.29144e+06	22315.1	78.951	68.306	60.2376	121.175	0.997826	592.915	31573.1	15049.1	16.3224	52.7358	0	415.963	209.449	5.59189e+06
4	2006	2015	1	0	0	0.253169	6.29239	4.75085	113.307	806145	0.42	417.797	0.347571		0.0118368	0.192469		35061.5	7984.18	69062.6	797507	28520.8	76.1273	45.0736	59.8051	245.178	0.966646	581.313	36324	17844	17.8242	60.014	0	470.024	282.091	5.77083e+06
4	2007	2015	1	0	0	0.250735	6.30615	4.89546	9.75467e+06	992804	0.459	422.501	0.330949		0.0122776	0.19109		43879.3	8517.05	67749.6	840498	24525.4	77.0793	50.0784	65.4194	276.387	1.05601	670.163	43462.3	21081	20.34	71.5942	0	480.548	379.017	5.80806e+06
4	2008	2015	1	0	0	0.260135	6.30996	5.23022	112.221	1176466	0.481	427.241	0.335398		0.0127185	0.18971		54856.6	8134.07	63771.2	1.00161e+06	21683.4	78.7751	56.2903	69.1482	334.449	1.00428	717.338	52754.7	23168.2	20.9601	74.9442	0	548.718	422.795	5.88064e+06
4	2009	2015	1	0	0	0.265596	6.36275	5.29613	111.902	1173878	0.405	430.016	0.999679		0.0131594	0.188331		72444.9	7705.22	58580	1.03232e+06	18974.5	78.8716	59.3137	71.8611	404.53	0.960983	694.423	55218.9	26222.7	21.7966	79.7971	0	597.015	500.241	5.44026e+06
4	2010	2015	1	0	0	0.261458	6.363	5.86361	113.432	1348644	0.434	435.911	0.99299		0.0130497	0.175949		89042.4	7935.92	59520	1.22768e+06	18776.1	82.141	70.4389	77.0939	453.781	0.985344	741.85	64029.4	28720.6	22.5665	84.324	0	703.665	568.741	7.03306e+06
4	2011	2015	1	0	0	0.26709	6.36238	6.62339	112.374	1637691	0.479	550.873	0.990383		0.0141463	0.184687		99551.2	7734.08	65414.5	2.60249e+06	51294.5	76.5802	0	79.3297	537.299	0.979382	743.569	75882.7	32145	24.2132	93.1664	2.18593e+06	806.969	639.637	7.18408e+06
4	2012	2015	1	0	0	0.266736	6.37823	6.8286	110.769	1881090	0.47	441.512	0.990127		0.0146282	0.201541		121777	7274.26	59491.8	2.26928e+06	48979.9	78.3541	0	83.5111	602.098	1.00746	791.278	86874.7	34629.8	26.4125	102.345	2.49915e+06	862.677	693.859	7.25244e+06
4	2013	2015	1	0	0	0.28564	6.40233	7.55801	109.596	2109364	0.461	441.241	0.992699		0.0154208	0.186375		143483	7086.1	53915.9	2.3351e+06	38751.7	81.4615	0	74.6039	696.352	0.968443	852.035	95421	37252.1	30.2453	116.211	2.84314e+06	902.384	777.188	7.44149e+06
4	2014	2015	1	0	0	0.276394	6.45332	7.62643	108.165	2256160	0.45	445.286	0.990786		0.0162252	0.178112		162107	6782.45	55073	2.40613e+06	43354.9	82.5167	0	89.8465	758.307	1.04137	880.639	100278	39517.6	30.7268	120.152	2.92794e+06	922.575	861.239	7.5993e+06
4	2015	2015	1	1	1	0.293633	6.50189	8.14381	107.591	2221166	0.361	444.56	0.99673		0.0147798	0.177048		179568	6572.47	48701.5	0	48312.2	80.1238	0	90.4455	819.73	0.971102	858.07	93665.4	43138.7	32.28	128.96	3.37529e+06	917.443	944.597	7.16127e+06
4	2016	2015	1	1	1	0.276313	6.54838	8.45281	107.104	2172996	0.313	440.133	0.97661		0.0162098	0.175976		191845	4836.31	23918.7	0	22658.6	68.5373	0	86.7022	1012.29	0.989834	894.418	98799.9	46281.5	31.3048	128.947	3.58588e+06	931.577	1028.87	6.74937e+06
4	2017	2015	1	1	1	0.289615	6.53029	8.88888	0	2.56459e+06	0.382709	460.576	1.23623		0.0166863	0.177294		207959	5716.24	38434.7	1.34721e+06	44199.8	77.5159	0	93.9017	995.261	0.989602	938.92	114374	48587.5	34.3449	140.074	4.38781e+06	1064.69	1081.15	7.73916e+06
4	2018	2015	1	1	1	0.293083	6.55382	9.29052	0	2.72269e+06	0.374782	463.14	1.30675		0.0171271	0.175915		224534	5448.31	35367.7	1.35186e+06	46023.5	77.3963	0	96.7071	1068.1	0.988916	967.754	121274	51382.3	35.8468	147.353	4.86891e+06	1118.75	1153.79	7.9181e+06
4	2019	2015	1	1	1	0.296551	6.57734	9.69216	0	2.88078e+06	0.366855	465.705	1.37728		0.017568	0.174535		241109	5180.38	32300.8	1.35651e+06	47847.2	77.2767	0	99.5124	1140.94	0.988231	996.588	128175	54177.2	37.3487	154.631	5.35002e+06	1172.81	1226.43	8.09704e+06
5	2000	2015	1	0	0	0.230664	6.13042	2.1262	4.78872e+06	0	0.497406	416.978	0.037318		0.0091916	0.200747		0	10271.1	90572.5	1.26821e+06	13196.5	79.549	103.925	46.2109	0	1.04506	448.747	0	1074.79	8.81297	16.3446	0	145.66	0	4.6972e+06
5	2001	2015	1	0	0	0.234132	6.15394	2.62983	4.43401e+06	0	0.494005	419.543	0.107842		0.00963246	0.199367		0	10003.1	87505.6	1.27285e+06	15020.2	79.4294	96.8013	49.0163	0	1.04193	477.581	3972.74	3869.65	10.3149	23.6229	0	199.72	0	4.87613e+06
5	2002	2015	1	0	0	0.2376	6.17747	3.13346	4.07929e+06	0	0.490604	422.107	0.178366		0.0100733	0.197988		0	9735.21	84438.6	1.2775e+06	16844	79.3098	89.6775	51.8216	0	1.0388	506.414	10872.8	6664.52	11.8167	30.9011	0	253.781	0	5.05507e+06
5	2003	2015	1	0	0	0.241067	6.20099	3.63709	3.72458e+06	0	0.487203	424.672	0.248891		0.0105142	0.196608		0	9467.28	81371.7	1.28215e+06	18667.7	79.1902	82.5536	54.627	0	1.03567	535.248	17772.9	9459.38	13.3186	38.1793	0	307.842	64.1668	5.23401e+06
5	2004	2015	1	0	0	0.244535	6.22451	4.14072	3.36987e+06	26402.3	0.483802	427.236	0.319415		0.0109551	0.195229		0	9199.35	78304.8	1.2868e+06	20491.4	79.0706	75.4298	57.4323	48.3346	1.03254	564.082	24673	12254.2	14.8205	45.4575	0	361.902	136.808	5.41295e+06
5	2005	2015	1	0	0	0.248003	6.24803	4.64436	3.01516e+06	56601.8	0.4804	429.801	0.389939		0.0113959	0.193849		9061.56	8931.41	75237.8	1.29144e+06	22315.1	78.951	68.306	60.2376	121.175	1.0294	592.915	31573.1	15049.1	16.3224	52.7358	0	415.963	209.449	5.59189e+06
5	2006	2015	1	0	0	0.253169	6.29239	5.41794	113.307	113290	0.454064	417.797	0.347571		0.0118368	0.192469		35061.5	7984.18	69062.6	797507	28520.8	76.1273	45.0736	59.8051	245.178	1.03338	581.313	36324	17844	17.8242	60.014	0	470.024	282.091	5.77083e+06
5	2007	2015	1	0	0	0.250735	6.30615	5.55159	9.75467e+06	134300	0.464822	422.501	0.330949		0.0122776	0.19109		43879.3	8517.05	67749.6	840498	24525.4	77.0793	50.0784	65.4194	276.387	1.01804	670.163	43462.3	21081	20.34	71.5942	0	480.548	379.017	5.80806e+06
5	2008	2015	1	0	0	0.260135	6.30996	5.98604	112.221	147000	0.473758	427.241	0.335398		0.0127185	0.18971		54856.6	8134.07	63771.2	1.00161e+06	21683.4	78.7751	56.2903	69.1482	334.449	1.00068	717.338	52754.7	23168.2	20.9601	74.9442	0	548.718	422.795	5.88064e+06
5	2009	2015	1	0	0	0.265596	6.36275	6.54902	111.902	163400	0.463345	430.016	0.999679		0.0131594	0.188331		72444.9	7705.22	58580	1.03232e+06	18974.5	78.8716	59.3137	71.8611	404.53	1.0117	694.423	55218.9	26222.7	21.7966	79.7971	0	597.015	500.241	5.44026e+06
5	2010	2015	1	0	0	0.261458	6.363	6.88292	113.432	184800	0.470287	435.911	0.99299		0.0130497	0.175949		89042.4	7935.92	59520	1.22768e+06	18776.1	82.141	70.4389	77.0939	453.781	1.01719	741.85	64029.4	28720.6	22.5665	84.324	0	703.665	568.741	7.03306e+06
5	2011	2015	1	0	0	0.26709	6.36238	7.76361	112.374	213000	0.486776	550.873	0.990383		0.0141463	0.184687		99551.2	7734.08	65414.5	2.60249e+06	51294.5	76.5802	0	79.3297	537.299	1.00665	743.569	75882.7	32145	24.2132	93.1664	2.18593e+06	806.969	639.637	7.18408e+06
5	2012	2015	1	0	0	0.266736	6.37823	8.48483	110.769	256300	0.476428	441.512	0.990127		0.0146282	0.201541		121777	7274.26	59491.8	2.26928e+06	48979.9	78.3541	0	83.5111	602.098	1.04928	791.278	86874.7	34629.8	26.4125	102.345	2.49915e+06	862.677	693.859	7.25244e+06
5	2013	2015	1	0	0	0.28564	6.40233	8.62573	109.596	289000	0.470595	441.241	0.992699		0.0154208	0.186375		143483	7086.1	53915.9	2.3351e+06	38751.7	81.4615	0	74.6039	696.352	1.03485	852.035	95421	37252.1	30.2453	116.211	2.84314e+06	902.384	777.188	7.44149e+06
5	2014	2015	1	0	0	0.276394	6.45332	9.38717	108.165	329200	0.457124	445.286	0.990786		0.0162252	0.178112		162107	6782.45	55073	2.40613e+06	43354.9	82.5167	0	89.8465	758.307	0.972506	880.639	100278	39517.6	30.7268	120.152	2.92794e+06	922.575	861.239	7.5993e+06
5	2015	2015	1	1	1	0.293633	6.50189	9.65696	107.591	371200	0.428902	444.56	0.99673		0.0147798	0.177048		179568	6572.47	48701.5	0	48312.2	80.1238	0	90.4455	819.73	0.961594	858.07	93665.4	43138.7	32.28	128.96	3.37529e+06	917.443	944.597	7.16127e+06
5	2016	2015	1	1	1	0.276313	6.54838	10.0218	107.104	414300	0.413826	440.133	0.97661		0.0162098	0.175976		191845	4836.31	23918.7	0	22658.6	68.5373	0	86.7022	1012.29	1.01086	894.418	98799.9	46281.5	31.3048	128.947	3.58588e+06	931.577	1028.87	6.74937e+06
5	2017	2015	1	1	1	0.289615	6.53029	10.6879	0	418996	0.439587	460.576	1.23623		0.0166863	0.177294		207959	5716.24	38434.7	1.34721e+06	44199.8	77.5159	0	93.9017	995.261	0.99182	938.92	114374	48587.5	34.3449	140.074	4.38781e+06	1064.69	1081.15	7.73916e+06
5	2018	2015	1	1	1	0.293083	6.55382	11.1916	0	449196	0.436185	463.14	1.30675		0.0171271	0.175915		224534	5448.31	35367.7	1.35186e+06	46023.5	77.3963	0	96.7071	1068.1	0.988688	967.754	121274	51382.3	35.8468	147.353	4.86891e+06	1118.75	1153.79	7.9181e+06
5	2019	2015	1	1	1	0.296551	6.57734	11.6952	0	479395	0.432784	465.705	1.37728		0.017568	0.174535		241109	5180.38	32300.8	1.35651e+06	47847.2	77.2767	0	99.5124	1140.94	0.985556	996.588	128175	54177.2	37.3487	154.631	5.35002e+06	1172.81	1226.43	8.09704e+06
6	2000	2015	1	0	0	0.766528	5.93067	2.37517	919880	0	0.155114	296.038	0	0	0.00455009	0.238792		0	611.882	3382.94	48672.8	2911.59	85.593	102.516	0	0	1.05016	33.8776	1707.45	4035.59	6.10949	0	0	0	0	0
6	2001	2015	1	0	0	0.75568	5.95554	2.95854	851749	0	0.174607	296.74	0	0	0.00449256	0.239087		0	595.364	3761	61779.5	3207.45	85.6409	95.0691	0	0	1.04652	39.8654	1669.09	6451.27	6.5864	2.03747	0	0	0	0
6	2002	2015	1	0	0	0.744833	5.98042	3.5419	783618	0	0.1941	297.442	0	0	0.00443503	0.239382		0	578.845	4139.06	74886.3	3503.32	85.6888	87.6226	0	0	1.04289	45.8533	1630.73	8866.94	7.06332	4.64278	0	0	0	0
6	2003	2015	1	0	0	0.733985	6.00529	4.12526	715487	0	0.213594	298.145	0.0559082	0	0.00437749	0.239677		0	562.327	4517.13	87993.1	3799.18	85.7367	80.1762	0	0	1.03926	51.8411	1592.36	11282.6	7.54023	7.2481	0	0	10.1676	0
6	2004	2015	1	0	0	0.723137	6.03016	4.70863	647356	0	0.233087	298.847	0.141917	0	0.00431996	0.239973		0	545.809	4895.19	101100	4095.05	85.7846	72.7297	0	0	1.03563	57.829	1554	13698.3	8.01715	9.85341	0	0	25.942	0
6	2005	2015	1	0	0	0.71229	6.05503	5.29199	579225	195253	0.25258	299.55	0.227925	7267.87	0.00426243	0.240268		0	529.291	5273.25	114207	4390.91	85.8325	65.2833	0	0	1.03199	63.8169	1515.64	16114	8.49406	12.4587	0	0	41.7164	1229.45
6	2006	2015	1	0	0	0.651144	6.14124	5.97688	112.7	1572362	0.276959	297.15	0.154165	40600	0.0042049	0.240563		7521.49	570	4937	4118	4738	59.98	81.88	0	40.655	1.05483	62.9297	267	18529.6	8.97097	15.064	0	0	57.4908	2973.22
6	2007	2015	1	0	0	0.642914	6.12165	6.4263	1873700	1873700	0.293046	300.07	0.155597	65110.3	0.00414736	0.240858		14774.4	530	6007	6788	5096	91.66	43.98	0	88.785	0.995198	84.4169	2054	18581.5	9.65	19.6231	0	59.059	79.6322	2661.4
6	2008	2015	1	0	0	0.727731	6.02913	6.78616	116.4	2336744	0.296917	301.87	0.157883	94031.4	0.00408983	0.241153		20068.9	544	5881	20346	5018	91.4	44	0	69.546	0.986697	87.4547	3025	21846.6	10.08	19.3478	0	71.7793	88.6374	6840.17
6	2009	2015	1	0	0	0.73124	6.14757	7.6876	113.6	2749450	0.303635	303.57	0.9972	122953	0.0040323	0.241448		27276.7	368	5870	57404	4885	91.83	45	0	110.93	1.02807	78.0592	575	26099.2	10.24	20.2801	0	90.4903	108.609	10958.6
6	2010	2015	1	0	0	0.674949	6.19904	8.42662	114.6	3270630	0.337565	304.35	0.998719	132272	0.00428332	0.204346		36005.2	292	5983	319170	3649	93.3	11.79	0	159.157	1.05846	95.4263	564	30299.4	10.62	25.301	0	119.229	120.132	10288.6
6	2011	2015	1	0	0	0.632374	6.2302	8.62677	113.9	4071700	0.379006	305.1	0.998689	173400	0.00446172	0.246172		30448.7	377	9816	433704	6295	94.15	0	0	193.905	0.967106	94.9449	846	33026.1	11.2	27.0819	1.1066e+06	159.959	132.79	9815.56
6	2012	2015	1	0	0	0.672519	6.2246	9.56221	112.9	4969080	0.415673	306	0.998693	216591	0.00377552	0.284687		38027	419	9649	626839	8604	90.59	0	58.73	228.046	1.0498	102.228	704	35621.7	11.63	29.8011	1.38146e+06	207.271	146.824	12810.7
6	2013	2015	1	0	0	0.596084	6.21838	9.76014	111	6045520	0.451238	308.3	0.855011	253440	0.00315209	0.260112		48256.3	453	9394	601191	8033	90.18	0	100	253.53	1.00109	124.723	3002	35475.5	12.55	34.5092	1.55327e+06	266.648	159.808	15030
6	2014	2015	1	0	0	0.632045	6.25904	10.5931	109.7	6894370	0.454773	306.2	0.862182	280886	0.00295991	0.235936		54178.2	464	9301	51761	9147	91.6	0	86.38	274.051	0.980207	122.929	3000	35719.8	13.0325	40.7542	1.66538e+06	309.117	176.037	17676.6
6	2015	2015	1	1	1	0.597263	6.30855	11.2823	107.9	7724590	0.426216	304.8	1.0023	308395	0.00296969	0.239036		75816	479	11274	0	8829	85.93	0	100	293.351	1.0161	115.933	103	40438.7	13.2596	42.9511	1.80175e+06	342.303	200.275	23637.5
6	2016	2015	1	1	1	0.560976	6.36754	11.5857	107.6	8428616	0.429896	304	1.00329	301067	0.0050129	0.228108		92637.4	236	4846	0	3533	66.7	0	100	403.242	0.974608	128.139	0	41049.7	13.6779	34.283	1.94887e+06	354.444	229.755	15920.5
6	2017	2015	1	1	1	0.582117	6.3535	12.2923	0	8.88416e+06	0.486497	307.979	1.26002	354322	0.00357203	0.243808		84967.6	331.073	9810.02	271488	7941.27	86.4075	0	117.803	388.589	0.988401	135.671	1055.27	45102	14.217	43.7225	2.39285e+06	402.524	231.009	22154.7
6	2018	2015	1	1	1	0.57127	6.37838	12.8757	0	9.60823e+06	0.50599	308.682	1.34603	383243	0.0035145	0.244103		92386.3	314.555	10188.1	284595	8237.14	86.4554	0	130.693	421.306	0.984768	141.659	1016.91	47517.7	14.6939	46.3278	2.65597e+06	439.705	246.784	23898.5
6	2019	2015	1	1	1	0.560422	6.40325	13.4591	0	1.03323e+07	0.525483	309.384	1.43204	412165	0.00345697	0.244399		99804.9	298.036	10566.1	297702	8533	86.5033	0	143.582	454.022	0.981135	147.647	978.545	49933.4	15.1709	48.9331	2.91908e+06	476.886	262.558	25642.3
7	2000	2015	1	0	0	0.404266	6.03506	1.62794	2.88494e+06	0	0.407594	640.081	0	0	0.00226992	0.306884		0	4776.79	38067.9	0	3418.75	99.2711	118.713	0	0	1.0321	278.076	5169.38	365.516	14.3187	55.5854	0	8.79043	23.8679	0
7	2001	2015	1	0	0	0.386145	6.05448	2.17512	2.67125e+06	0	0.41242	637.239	0	0	0.00358024	0.299159		0	4767.45	36354.6	44136.6	4270.18	99.1245	110.642	0	0	1.02968	295.723	6730	2945.34	14.6278	55.8767	0	51.6614	51.2501	0
7	2002	2015	1	0	0	0.368024	6.07389	2.72229	2.45756e+06	555870	0.417245	634.398	0	0	0.00489057	0.291434		0	4758.12	34641.4	127406	5121.61	98.978	102.571	0	0	1.02726	313.371	8290.62	5525.16	14.9368	56.1679	0	94.5324	78.6322	0
7	2003	2015	1	0	0	0.349903	6.0933	3.26946	2.24387e+06	1.70946e+06	0.422071	631.556	0.0552898	0	0.0062009	0.28371		0	4748.78	32928.2	210676	5973.04	98.8315	94.4996	0	0	1.02484	331.018	9851.24	8104.99	15.2458	56.4592	0	137.403	106.014	0
7	2004	2015	1	0	0	0.331782	6.11271	3.81664	2.03018e+06	2.86304e+06	0.426897	628.715	0.145142	0	0.00751123	0.275985		0	4739.45	31215	293946	6824.46	98.6849	86.4285	0	0	1.02241	348.666	11411.9	10684.8	15.5549	56.7505	0	180.274	133.397	0
7	2005	2015	1	0	0	0.313661	6.13212	4.36381	1.81649e+06	4.01663e+06	0.431723	625.873	0.234994	99162.8	0.00882156	0.26826		6209.67	4730.11	29501.7	377216	7675.89	98.5384	78.3575	0	0	1.01999	366.313	12972.5	13264.6	15.8639	57.0418	0	223.145	160.779	0
7	2006	2015	1	0	0	0.292747	6.21302	5.52955	112.9	4942100	0.421885	607.89	0.172482	245400	0.0101319	0.260535		21093.1	3633	25209	4608	13112	97.2	31.28	0	99.069	1.01568	348.489	5781	15844.5	16.173	57.3331	0	266.016	188.161	90689.7
7	2007	2015	1	0	0	0.200887	6.23124	5.95918	5876612	5876612	0.423884	610.99	0.175453	307049	0.0114422	0.25281		32608.8	4675	29522	8356	10507	98.25	76.85	0	146.856	1.0185	405.897	14136	19190.1	16.9	43.7375	0	243.115	232.185	281774
7	2008	2015	1	0	0	0.214903	6.21219	5.98509	112.7	7047175	0.424383	613.89	0.177442	410992	0.0127525	0.245085		43922.3	4649	28392	37895	7372	100	71.2	0	156	1.03171	425.669	17558	20877.1	16.85	44.9185	0	282.419	256.334	347583
7	2009	2015	1	0	0	0.261064	6.15213	6.24922	112.9	7706600	0.502984	615.88	0.998393	514935	0.0140629	0.237361		60154.6	5479	20156	568421	7920	96.68	60.51	0	196.1	1.01182	423.929	16518	22845.7	16.74	78.37	0	343.635	253.494	323755
7	2010	2015	1	0	0	0.314801	6.18408	6.30425	114.6	9881100	0.458575	615.62	1.00021	505742	0.0153338	0.222409		80939.3	5644	17409	734522	8582	99.24	89.4	0	268.84	0.962576	448.648	23576	25762.8	16.92	62.44	0	482.371	284.074	424333
7	2011	2015	1	0	0	0.253216	6.19051	7.16085	113.5	12157400	0.481505	618.7	0.997414	723948	0.0161567	0.230999		83020.1	4615	17685	2878887	19241	97.1	0	27.8	370.6	1.00346	498.312	27291	28903.7	17.16	60.6345	1.87684e+06	587.51	316.425	484144
7	2012	2015	1	0	0	0.258027	6.20305	8.00306	112.1	13597027	0.484167	620.4	0.998549	856202	0.0183487	0.218865		97201.3	4708	17130	1777144	10479	98.21	0	96	417.583	1.03189	476.091	32667	32514.9	17.73	57.3903	2.09139e+06	646.448	344.001	665788
7	2013	2015	1	0	0	0.139816	6.25424	8.45071	110.4	14182282	0.454529	621.7	0.999035	984572	0.0199605	0.204256		118572	4863	17168	1481993	0	96.9	0	97.05	508.1	1.0015	573.955	45178	32632.1	19.4	70.3076	2.32085e+06	625.298	383.721	927114
7	2014	2015	1	0	0	0.137845	6.2854	9.32215	109.2	15443170	0.456802	620.9	1.00032	1056537	0.0206712	0.193905		139475	4661	16014	2153353	27399	96.54	0	94.84	569.6	0.966922	579.61	26666	36010.9	19.9975	70.7684	2.43589e+06	662.766	420.698	1.09947e+06
7	2015	2015	1	1	1	0.100533	6.36092	10.1961	108.7	14174300	0.48382	622.1	0.999646	1065708	0.0212935	0.1865		138560	4470	14738	0	24978	96.8	0	90.16	670.2	1.04813	549.963	18253	39951	18.2605	66.6405	2.70261e+06	572.622	415.367	1.2094e+06
7	2016	2015	1	1	1	0.0804601	6.44776	10.9552	108.7	15311776	0.474916	529	0.996219	1279945	0.0233649	0.188296		152192	4018	8023	0	11039	97.33	0	98.67	739.7	0.967808	463.618	18074	41646.6	18.769	34.1438	2.65158e+06	571.885	481.327	917347
7	2017	2015	1	1	1	0.096211	6.36506	10.9299	0	1.78597e+07	0.489632	591.776	1.31322	1.34648e+06	0.0245455	0.175562		169743	4618.07	8943	1.37645e+06	17893	96.7798	0	123.79	775.336	0.990916	578.083	31699.9	44222.5	19.5724	60.5372	3.47922e+06	737.598	489.365	1.24545e+06
7	2018	2015	1	1	1	0.0780901	6.38448	11.4771	0	1.90132e+07	0.494458	588.934	1.40307	1.45042e+06	0.0258558	0.167837		183370	4608.74	7229.77	1.45972e+06	18744.4	96.6333	0	136.777	841.791	0.988493	595.731	33260.5	46802.4	19.8815	60.8284	3.85582e+06	780.469	516.747	1.35043e+06
7	2019	2015	1	1	1	0.0599692	6.40389	12.0243	0	2.01668e+07	0.499283	586.093	1.49292	1.55436e+06	0.0271662	0.160112		196998	4599.4	5516.55	1.54299e+06	19595.9	96.4867	0	149.764	908.246	0.98607	613.378	34821.1	49382.2	20.1905	61.1197	4.23242e+06	823.34	544.129	1.45541e+06
8	2000	2015	1	0	0	0.180885	5.98232	4.75451	715712	0	0.416854	241.019	0	0	0.0027987	0.16228		0	244	138945	983004	4869.61	0	13.7455	0	0	0.996688	0	0	0	4.07313	0	0	0	0	74348
8	2001	2015	1	0	0	0.191605	6.02108	5.19023	662704	0	0.412607	244.651	0	0	0.00315814	0.164868		0	323.455	133102	953518	5424.36	6.63545	13.0909	0	0	0.997947	0	0	0	4.56638	0	0	0	0	74179.3
8	2002	2015	1	0	0	0.202324	6.05984	5.62594	609697	0	0.40836	248.283	0	0	0.00351757	0.167457		0	402.909	127260	924033	5979.12	13.2816	12.4364	0	0	0.999206	0	0	0	5.05963	1.19968	0	0	0	74010.6
8	2003	2015	1	0	0	0.213044	6.09859	6.06166	556689	0	0.404113	251.915	0.0219768	0	0.00387701	0.170045		0	482.364	121418	894548	6533.87	19.9278	11.7818	0	0	1.00047	0	0	3222	5.55288	4.00253	0	0	0	73841.9
8	2004	2015	1	0	0	0.223764	6.13735	6.49737	503682	0	0.399867	255.548	0.108324	0	0.00423644	0.172633		0	561.818	115575	865062	7088.63	26.574	11.1273	0	0	1.00173	0	0	6811.48	6.04613	6.80538	0	0.269421	0	73673.2
8	2005	2015	1	0	0	0.234484	6.17611	6.93309	450675	0	0.39562	259.18	0.194672	0	0.00459588	0.175221		0	641.273	109733	835577	7643.38	33.2202	10.4727	0	0	1.00298	0.148781	0	10400.9	6.53938	9.60823	0	15.1258	0	73504.5
8	2006	2015	1	0	0	0.257179	6.2063	7.69753	111.5	1237372	0.361249	260.98	0.155299	97300	0.00495532	0.177809		4393.63	667	101519	698427	5623	32.53	0	0	33.9	1.03643	12.4453	315	13990.4	7.03263	12.4111	0	29.9822	9.36917	73335.7
8	2007	2015	1	0	0	0.274966	6.21416	8.00084	1457813	1457813	0.4006	267.36	0.153089	71221.2	0.00531475	0.180397		8021.54	651	11560	714500	5600	37.77	0	0	0	1.00225	33.3876	340	20139	7.92	18.4241	0	58.3708	58.2251	63098
8	2008	2015	1	0	0	0.352329	6.16611	8.12743	111.3	1676482	0.389089	270.3	0.152941	140042	0.00567419	0.182985		6839.38	641	118400	571000	5600	54.79	0	0	48.4	1.0071	20.6535	520	21991.9	8.02	15.6882	0	60.3154	63.4499	77563.5
8	2009	2015	1	0	0	0.251661	6.40801	8.63292	111.4	1957038	0.353493	273.49	0.994186	208862	0.00603362	0.185573		7242.44	613	95900	814400	6400	57.66	0	51.21	67.7	0.965795	160.02	725	24982.7	8.33	23.1657	0	65.7875	85.9425	76846.5
8	2010	2015	1	0	0	0.272326	6.40295	8.78305	112.8	2329210	0.380386	279.79	0.988742	198430	0.00670569	0.188988		11134.3	719	147733	1192988	16544	76.52	72	91.4	94.701	0.99205	190.324	2440	26725.5	9.12	20.4705	0	81.5435	95.7381	81137.6
8	2011	2015	1	0	0	0.257433	6.46483	9.44674	115	2855509	0.39443	282.3	0.811194	265083	0.00720816	0.185844		24335	1406	87799	150655	17390	99.29	0	62.63	107.5	0.988108	194.246	4120	30601.8	9.32	21.4111	882348	98.3636	112.305	84504
8	2012	2015	1	0	0	0.255847	6.50226	9.69194	113.6	3526171	0.38858	284.4	0.802391	375039	0.00670002	0.201848		40006.1	2094	80645	137917	17495	77	0	53.6	113.8	1.05289	226.394	5162	33256	9.55	26.8299	1.11338e+06	116.647	138.259	93501.2
8	2013	2015	1	0	0	0.240054	6.56173	10.4452	112.5	4291600	0.38319	285.6	0.802521	468896	0.00687913	0.192362		60407.7	2097	76017	1392656	13801	75.51	0	72.6	134.2	1.03674	245.559	8037	38113.2	10.37	36.4454	2.93502e+06	136.447	169.028	15723.7
8	2014	2015	1	0	0	0.255102	6.55838	10.6686	110.8	5200600	0.364708	290	0.997586	584796	0.00705811	0.190765		100009	1681	51518	1572768	19985	98	0	63.7	206.2	0.986926	247.908	10002	40017.1	10.9558	41.5905	1.40579e+06	154.279	204.832	73906.5
8	2015	2015	1	1	1	0.453351	6.48417	11.3721	110.7	6254100	0.331974	296.49	0.989038	698639	0.00900585	0.212822		53542.8	1429	33221	0	8635	96	0	85.2	222.2	1.05091	278.94	12141	49007.8	11.5628	37.7713	1.58028e+06	166.565	244.429	67621.3
8	2016	2015	1	1	1	0.416582	6.52623	12.1549	110.5	7013500	0.323833	300	0.993333	703231	0.00874259	0.198854		65294.8	300	17159	0	3618	99	0	93.43	282.105	0.996763	261.452	15916	52490.4	12.3064	36.4709	1.75059e+06	178.605	275.408	90175.9
8	2017	2015	1	1	1	0.363122	6.64119	12.1617	0	6.95472e+06	0.344659	302.767	1.23084	759427	0.00890911	0.206278		83819	1594.73	39625.2	481752	14300.4	112.974	2.61818	106.926	269.445	1.0181	340.093	14756.2	53474.6	12.4584	43.2424	2.39615e+06	193.403	280.154	71479.9
8	2018	2015	1	1	1	0.373842	6.67994	12.5974	0	7.54112e+06	0.340412	306.4	1.31719	828248	0.00926854	0.208867		92012.6	1674.18	33782.9	452267	14855.2	119.621	1.96364	116.054	294.494	1.01936	368.422	16310.8	57064.1	12.9516	46.0453	2.65604e+06	208.259	304.771	71311.2
8	2019	2015	1	1	1	0.384561	6.7187	13.0331	0	8.12753e+06	0.336165	310.032	1.40354	897068	0.00962798	0.211455		100206	1753.64	27940.6	422782	15409.9	126.267	1.30909	125.181	319.542	1.02062	396.75	17865.3	60653.6	13.4449	48.8481	2.91593e+06	223.115	329.388	71142.5
9	2000	2013	1	0	0	0.343348	5.8596	3.51451	3.96574e+06	0	0.702683	503.855	0	0	0.0259709	0.272368		0	20101.6	127704	1.30368e+06	2363.24	75.6586	129.584	106.403	0	1.01822	619.576	0	5722.06	15.1566	14.9392	0	409.921	0	1.72882e+06
9	2001	2013	1	0	0	0.345564	5.89904	3.86914	3.67199e+06	465146	0.690621	511.065	0	0	0.0252871	0.268655		0	19052.3	125594	1.34038e+06	8960.82	76.8127	120.699	104.613	0	1.01747	662.152	0	7576.95	15.5923	20.559	0	436.064	0	1.65337e+06
9	2002	2013	1	0	0	0.347779	5.93848	4.22376	3.37824e+06	1.81624e+06	0.678558	518.274	0.025616	856.143	0.0246032	0.264943		0	18003	123484	1.37709e+06	15558.4	77.9668	111.814	102.823	0	1.01673	704.727	0	9431.84	16.0279	26.1788	0	462.206	0	1.57793e+06
9	2003	2013	1	0	0	0.349995	5.97792	4.57839	3.08449e+06	3.16733e+06	0.666496	525.484	0.109685	85106.4	0.0239193	0.26123		0	16953.7	121375	1.4138e+06	22156	79.1209	102.929	101.033	0	1.01599	747.303	0	11286.7	16.4636	31.7986	0	488.348	0	1.50248e+06
9	2004	2013	1	0	0	0.35221	6.01737	4.93302	2.79074e+06	4.51842e+06	0.654434	532.694	0.193754	169357	0.0232354	0.257517		0	15904.4	119265	1.45051e+06	28753.6	80.275	94.0444	99.2427	8.86345	1.01524	789.879	0	13141.6	16.8992	37.4185	0	514.49	35.6971	1.42703e+06
9	2005	2013	1	0	0	0.354426	6.05681	5.28764	2.49699e+06	5.86951e+06	0.642371	539.903	0.277823	253607	0.0225515	0.253804		3893.15	14855.1	117155	1.48721e+06	35351.1	81.4291	85.1595	97.4527	88.8964	1.0145	832.455	0	14996.5	17.3349	43.0383	0	540.632	84.9614	1.35158e+06
9	2006	2013	1	0	0	0.341619	6.13596	5.20365	114.1	6460021	0.584054	553.7	0.217627	345800	0.0218676	0.250091		31023.5	10353	107097	966633	70782	73.4	61.46	100	223.767	1.04075	732.026	4756	16851.4	17.7706	48.6581	0	566.774	134.226	1.27614e+06
9	2007	2013	1	0	0	0.331427	6.1676	6.12542	8078243	8078243	0.603844	559.9	0.2197	422107	0.0211837	0.246378		42953.9	11961	114626	975297	55741	83.15	55.11	94.02	289.124	1.00587	881.65	7461	18534.9	18.84	61.9924	0	487.764	208.176	986992
9	2008	2013	1	0	0	0.41903	6.14489	6.6674	112.1	10360548	0.624861	567.37	0.220139	506358	0.0204998	0.242665		56653.7	11940	100688	1007749	41483	87.1	66.7	94.02	353.866	0.993018	977.416	10178	20297.8	18.38	56.7	0	611.36	231.963	1.64011e+06
9	2009	2013	1	0	0	0.396354	6.22395	6.93833	110.9	11248807	0.601362	573.16	0.99494	590608	0.0198159	0.238952		74064	12595	98336	1342680	27402	93.75	82.42	94	435.504	1.00181	978.354	11763	22910.8	18.81	52.831	0	643.316	291.065	610530
9	2010	2013	1	0	0	0.371376	6.23047	7.22664	112.5	13155890	0.615154	581.4	1	650501	0.0175694	0.226162		89468.7	15585	93059	1397165	28160	89.46	84.66	94.64	408.44	1.05444	1156.29	15391	24648.4	18.94	74.3491	0	745.06	319.605	982749
9	2011	2013	1	0	0	0.30504	6.28432	7.25627	111.9	14866057	0.587466	529.4	0.995089	773559	0.0190508	0.241428		89240	7605	131356	3314539	92526	95.68	0	94.64	479.333	0.965698	1242.41	15391	25761.6	19.72	84.329	1.52447e+06	762.812	382.639	1.04826e+06
9	2012	2013	1	0	0	0.37677	6.29556	7.47033	110.1	15668969	0.574922	593	0.998145	835701	0.0175728	0.225125		108053	7283	118149	3196194	81205	91.27	0	93.45	570	0.997461	1137.53	31573	28876.4	20.72	89.7498	1.74349e+06	766.83	407.491	674928
9	2013	2013	1	1	1	0.368611	6.30843	8.1891	109	16836494	0.570843	602	0.992525	922013	0.0189934	0.229589		136888	5508	113310	3063547	93336	85.6	0	0	680	1.00711	1231.36	38057	28718.3	21.26	78.8418	1.79862e+06	797.361	434.302	959353
9	2014	2013	1	1	1	0.348258	6.40987	8.40341	108.9	17918143	0.523598	611.4	0.977756	1032639	0.0178845	0.226423		157258	4962	130511	3518208	144172	85.33	0	100	840	1.00455	1320.65	42839	31622.6	21.3393	83.6686	1.90571e+06	763.153	527.473	745511
9	2015	2013	1	1	1	0.392219	6.4756	8.86893	108.3	18844808	0.5055	617.45	0.995077	1096434	0.0141257	0.203845		183098	4208	94295	0	137852	89.4	0	94.92	930	1.04114	1193.4	49050	33194.1	21.7105	104.935	2.19453e+06	764.177	583.375	493145
9	2016	2013	1	1	1	0.39421	6.55151	9.22	108.1	20298494	0.47837	626	0.99361	1174474	0.0143659	0.216131		207487	2153	48049	0	51644	97.75	0	94.15	1050	0.998532	1115.9	50076	35968.3	21.9471	108.274	2.29439e+06	763.723	665.703	470156
9	2017	2013	1	1	1	0.381013	6.53013	9.54317	0	2.20826e+07	0.497624	626.42	1.28665	1.26461e+06	0.0143448	0.209249		209959	2263.62	91840.2	1.9277e+06	114522	95.2782	0	75.9727	1049.29	1.00557	1343.36	55669.1	37255.3	22.5628	110.476	2.85128e+06	854.337	676.133	446211
9	2018	2013	1	1	1	0.383229	6.56957	9.8978	0	2.34337e+07	0.485562	633.63	1.37072	1.34886e+06	0.0136609	0.205536		227131	1214.33	89730.6	1.96441e+06	121120	96.4323	0	74.1827	1129.32	1.00483	1385.94	60757.4	39110.2	22.9985	116.096	3.1613e+06	880.479	725.397	370763
9	2019	2013	1	1	1	0.385444	6.60901	10.2524	0	2.47848e+07	0.473499	640.84	1.45479	1.43311e+06	0.012977	0.201823		244304	165.036	87620.9	2.00111e+06	127717	97.5864	0	72.3927	1209.36	1.00408	1428.51	65845.7	40965	23.4341	121.716	3.47133e+06	906.621	774.661	295316
10	2000	2013	1	0	0	0	6.56044	2.30284	6.59565e+06	9.5898e+06	0.654368	354.387	0.269269	817545	0.0128033	0.114029		3676.09	6087.13	105129	2.58615e+06	0	21.2973	54.9693	140.909	0	0.979968	1573.22	38744.1	16940.8	7.79745	44.3867	0	1043.94	489.453	3.65028e+06
10	2001	2013	1	0	0	0	6.57924	2.7508	6.10709e+06	1.05014e+07	0.641677	353.959	0.323488	896571	0.0125049	0.114131		13653.4	6047.91	104916	2.49455e+06	0	21.1	51.3909	136.364	0	0.981447	1582.59	41912.5	18182.9	9.05994	46.6421	0	1032.84	513.884	3.52981e+06
10	2002	2013	1	0	0	0	6.59805	3.19876	5.61853e+06	1.1413e+07	0.628986	353.531	0.377706	975597	0.0122066	0.114232		23630.7	6008.69	104704	2.40295e+06	0	20.9027	47.8125	131.818	42.7055	0.982925	1591.97	45081	19425.1	10.3224	48.8974	0	1021.74	538.315	3.40934e+06
10	2003	2013	1	0	0	0	6.61685	3.64672	5.12997e+06	1.23246e+07	0.616296	353.103	0.431925	1.05462e+06	0.0119083	0.114333		33608	5969.47	104492	2.31136e+06	6518.58	20.7055	44.2342	127.273	96.6639	0.984404	1601.34	48249.5	20667.2	11.5849	51.1528	0	1010.64	562.746	3.28886e+06
10	2004	2013	1	0	0	0	6.63566	4.09468	4.64141e+06	1.32362e+07	0.603605	352.676	0.486144	1.13365e+06	0.01161	0.114434		43585.3	5930.25	104280	2.21976e+06	14274.8	20.5082	40.6558	122.727	150.622	0.985882	1610.72	51418	21909.3	12.8474	53.4081	0	999.545	587.177	3.16839e+06
10	2005	2013	1	0	0	0	6.65446	4.54264	4.15285e+06	14147784	0.590914	352.248	0.540362	1.21268e+06	0.0113117	0.114535		53562.6	5891.04	104067	2.12816e+06	22031	20.3109	37.0775	118.182	204.581	0.987361	1620.09	54586.4	23151.4	14.1099	55.6635	0	988.446	611.608	3.04792e+06
10	2006	2013	1	0	0	0.0236026	6.68523	5.42783	113.8	11360123	0.547969	348.95	0.505373	561600	0.0110133	0.114636		37843.1	5201	103237	703763	41170	15.3	19.9	100	230.06	0.9989	1572.33	13534	24393.6	15.3724	57.9189	0	977.348	636.039	2.92745e+06
10	2007	2013	1	0	0	0.0170638	6.70967	5.46322	13435436	13435436	0.557928	350.25	0.505182	1.37073e+06	0.010715	0.114737		47712	5704	103932	1024268	39729	17.64	15.95	100	297.814	1.0267	1813.81	25817	25353.3	17.2	62.8298	0	749.563	532.715	2.59591e+06
10	2008	2013	1	0	0	0.0159886	6.73222	5.70587	113.4	16078635	0.546526	351.42	0.504155	1.44975e+06	0.0104167	0.114839		70019.5	5319	99706	2253174	40233	19.48	29.25	100	341.9	0.971113	1721.38	58161	27498.1	17	53.1423	0	829.743	619.46	3.06665e+06
10	2009	2013	1	0	0	0.0182701	6.75752	6.17663	113.1	17304740	0.52789	352.03	0.999119	1.52878e+06	0.0101184	0.11494		87503	5034	91613	2160728	40965	17.94	35.99	100	431.7	0.970488	1531.07	74177	28939.7	17.94	65.0429	0	868.703	698.386	1.68244e+06
10	2010	2013	1	0	0	0.01654	6.74791	6.60398	114.2	21250121	0.54323	351.79	1.00034	1800334	0.00971516	0.106113		119076	5548	77532	2580049	30205	19.1	70.59	100	538.894	0.977967	1690.42	90495	30301.6	19	66.6919	0	1062.61	807.915	2.60695e+06
10	2011	2013	1	0	0	0.0224274	6.75389	6.79671	112.2	23987633	0.534029	351.6	1.00028	2070167	0.00864015	0.144259		132903	7529	118539	2765131	71361	24.58	0	100	553.267	0.966893	1614.66	110256	29461.1	21.24	70.3423	2.02688e+06	1118.77	879.725	2.83184e+06
10	2012	2013	1	0	0	0.0541672	6.72983	7.73662	109.5	24293160	0.532311	350.4	1.00171	2343946	0.00845709	0.114237		169950	6516	122876	2224012	85418	24.78	0	100	624.76	1.00668	1597.48	127520	29388.9	23.43	75.8445	2.47094e+06	1100.8	861.322	2.20856e+06
10	2013	2013	1	1	1	0.0630096	6.73809	8.27997	108.7	26232539	0.530623	349.8	1.00086	2392487	0.00781867	0.0947694		187836	6322	124889	1982473	98218	24.19	0	100	623.75	1.01453	1698.85	138391	33404	28.88	79.8335	2.69973e+06	1154.85	912.173	2.50758e+06
10	2014	2013	1	1	1	0.0716735	6.76349	8.80655	105.8	23858951	0.505638	348.2	1.0023	2417012	0.0137895	0.0989233		190667	6338	116010	1670745	137301	23.94	0	100	652.06	1.05259	1686.22	159010	35008.7	28.2569	79.738	2.64696e+06	981.245	852.767	2.30349e+06
10	2015	2013	1	1	1	0.0878619	6.81525	9.0585	103	23369966	0.477921	346.05	1.00309	1290742	0.00942421	0.122322		156810	5604	114229	0	91225	23.45	0	100	710.652	0.960764	1556.64	9575	35017.5	26.6159	78.3599	1.96118e+06	884.686	880.561	1.41898e+06
10	2016	2013	1	1	1	0.131637	7.0071	9.47844	97.5	14619713	0.358402	346	1	1329602	0.00463063	0.126786		47368.6	3098	58168	0	78425	0	0	0	806.785	1.01193	1956.88	2634	37879.4	23.5984	71.4086	1.96556e+06	412.086	659.061	1.42614e+06
10	2017	2013	1	1	1	0.108432	6.88012	9.91815	0	2.50869e+07	0.438625	347.114	1.19099	2.16099e+06	0.00773176	0.115749		173290	5420.42	101520	1.02899e+06	115105	17.9436	0	63.6364	852.082	1.0051	1732.59	92608.1	38056.9	29.2598	82.7279	3.15034e+06	855.265	904.779	1.60226e+06
10	2018	2013	1	1	1	0.118592	6.89892	10.3661	0	2.59985e+07	0.425935	346.686	1.2452	2.24001e+06	0.00743343	0.11585		183267	5381.2	101308	937394	122862	17.7464	0	59.0909	906.04	1.00658	1741.96	95776.6	39299.1	30.5223	84.9832	3.47274e+06	844.166	929.21	1.48179e+06
10	2019	2013	1	1	1	0.128751	6.91773	10.8141	0	2.69101e+07	0.413244	346.258	1.29942	2.31904e+06	0.00713511	0.115951		193245	5341.98	101096	845797	130618	17.5491	0	54.5455	959.998	1.00806	1751.34	98945.1	40541.2	31.7848	87.2386	3.79514e+06	833.068	953.641	1.36132e+06
11	2000	2015	1	0	0	0.0846055	5.72887	2.49169	4.78872e+06	0	0	186.181	0.0054117	0	0.0102164	0.128135		0	6027.23	101336	0	647.5	11.6338	173.789	0	0	1.00035	27.5738	0	0	6.60864	31.2062	0	68.2851	0	0
11	2001	2015	1	0	0	0.0981312	5.75197	2.9535	4.43401e+06	0	0	185.713	0.0783577	0	0.0097554	0.127559		0	5809.55	98532.3	0	2821.45	14.07	161.427	0	0	1.00068	38.9477	0	0	6.80619	31.2195	0	90.5022	7.01081	0
11	2002	2015	1	0	0	0.111657	5.77508	3.41531	4.07929e+06	447592	0	185.245	0.151304	0	0.00929437	0.126983		4148.45	5591.86	95728.4	0	4995.41	16.5062	149.065	0	0	1.00101	50.3215	0	2967.92	7.00374	31.2327	0	112.719	21.2298	0
11	2003	2015	1	0	0	0.125183	5.79818	3.87712	3.72458e+06	1.1201e+06	0	184.777	0.22425	0	0.00883334	0.126408		10175.1	5374.18	92924.5	0	7169.36	18.9424	136.704	0	0	1.00134	61.6953	0	5979.52	7.20128	31.246	0	134.936	35.4487	0
11	2004	2015	1	0	0	0.138708	5.82128	4.33894	3.36987e+06	1.7926e+06	0	184.308	0.297196	50071.5	0.00837231	0.125832		16201.8	5156.5	90120.6	85563.4	9343.32	21.3785	124.342	0	0	1.00167	73.0691	0	8991.13	7.39883	31.2593	0	157.153	49.6677	0
11	2005	2015	1	0	0	0.152234	5.84438	4.80075	3.01516e+06	2.46511e+06	0	183.84	0.370141	105767	0.00791128	0.125256		22228.5	4938.82	87316.7	183372	11517.3	23.8147	111.98	3.94636	0	1.002	84.4429	1226.8	12002.7	7.59638	31.2725	0	179.37	63.8866	0
11	2006	2015	1	0	0	0.151226	5.84589	5.41281	113.307	2782323	0	179.41	0.340895	158000	0.00745026	0.124681		21015.1	3726	79735	320748	22727	21.87	100	12.5	27.3	1.0323	98.8387	3456	15014.3	7.79393	31.2858	0	201.587	78.1056	0
11	2007	2015	1	0	0	0.158094	5.85357	5.62293	9.75467e+06	3416200	0	182.3	0.340812	217157	0.00698923	0.124105		27178.2	3557	72884	122485	19440	31.68	100	12.7	45.9	1.00834	86.0916	4174	16505.9	8.23	27.7171	0	168.517	97.63	141602
11	2008	2015	1	0	0	0.185646	5.95846	5.85912	112.221	4390600	0	185	0.339405	272852	0.0065282	0.123529		33523	4753	76910	137829	19536	25.59	100	13.2	67	1.01426	120.643	4676	19231.8	8.28	27.586	0	216.835	110.283	188088
11	2009	2015	1	0	0	0.207041	5.99577	6.78669	111.902	5098600	0	173.3	1.00127	328547	0.00606717	0.122953		56217.9	4383	74664	0	15224	8.01	43.9	37.2	90	0.969627	134.802	4806	24614.2	8.25	33.2	0	266.185	124.22	225388
11	2010	2015	1	0	0	0.260528	5.97328	7.00099	113.432	6033300	0	186.34	0.937373	382787	0.00690045	0.131608		56521.4	4718	72370	978778	13390	96.98	72	76.51	97.1	0.974886	141.172	4630	27915.6	8.49	34.471	0	312.692	133.13	331966
11	2011	2015	1	0	0	0.223542	5.97962	7.61424	112.374	7184500	0	186.8	0.945396	427174	0.004177	0.123682		63358	6480	86000	18292	0	17.09	0	96.46	124.7	1.01041	150.697	5100	30796.7	8.27	34.399	1.35077e+06	361.626	145.014	541740
11	2012	2015	1	0	0	0.267766	5.99416	8.05312	110.769	7833400	0	186.7	0.946974	496120	0.00389258	0.108449		70100.8	2696	71193	2062936	27228	13	0	100	170	0.978887	156.371	26000	35360.9	9.1	34.9799	1.5562e+06	407.594	156.058	682451
11	2013	2015	1	0	0	0.302184	5.98509	8.79909	109.596	8349000	0	183.2	1.00983	579335	0.00483898	0.115168		80316.9	2053	77493	2312187	32156	62.32	0	92.36	185	1.0294	223.255	8275	38877	9.39	32.8	1.59544e+06	389.508	168.535	734802
11	2014	2015	1	0	0	0.282602	5.99609	9.20247	108.165	8385600	0	178.6	1.01288	620167	0.00310524	0.119698		94123.7	2621	76139	2519184	61607	61.8	0	95.93	190	0.985893	184.325	10044	38626.9	9.37	30.77	1.57643e+06	389.006	179.579	1.41407e+06
11	2015	2015	1	1	1	0.255233	6.08193	9.43382	107.591	8874300	0	174.7	1.01116	657634	0.00300754	0.123025		66450	2874	60576	0	37700	51.27	0	97.25	210	1.00603	210.222	15289	41047.6	9.6621	28.8266	1.84096e+06	361.428	217.555	1.28408e+06
11	2016	2015	1	1	1	0.273402	6.14892	9.50257	107.104	9153800	0	175	1	699542	0.0036396	0.122924		73468.6	2099	27462	0	21163	33.14	0	98.04	260	1.0337	173.129	15000	42805.1	9.7623	28.8378	1.8551e+06	364.422	231.093	1.03957e+06
11	2017	2015	1	1	1	0.314542	6.12158	10.3425	0	1.05352e+07	0	178.223	1.24549	774109	0.00237894	0.118348		94548.6	2326.64	53669.9	1.35707e+06	37604.7	53.0489	0	129.172	267.098	1.00595	220.929	17218.7	48142	9.96695	31.4317	2.39271e+06	445.975	234.514	1.42658e+06
11	2018	2015	1	1	1	0.328068	6.14468	10.8043	0	1.12077e+07	0	177.755	1.31844	829804	0.00191791	0.117772		100575	2108.95	50866	1.45488e+06	39778.7	55.4851	0	139.607	289.387	1.00628	232.303	18551.3	51153.6	10.1645	31.4449	2.65002e+06	468.192	248.733	1.56626e+06
11	2019	2015	1	1	1	0.341593	6.16778	11.2661	0	1.18802e+07	0	177.287	1.39138	885499	0.00145689	0.117196		106602	1891.27	48062.1	1.55269e+06	41952.6	57.9213	0	150.043	311.676	1.00661	243.676	19884	54165.2	10.362	31.4582	2.90733e+06	490.409	262.952	1.70593e+06
12	2000	2015	1	0	0	0.230664	6.13042	2.82083	4.78872e+06	48175.5	0.813618	416.978	0.037318	161600	0.0091916	0.200747		0	10271.1	90572.5	1.26821e+06	13196.5	79.549	103.925	46.2109	0	1.01607	448.747	0	1074.79	8.81297	16.3446	0	145.66	0	4.6972e+06
12	2001	2015	1	0	0	0.234132	6.15394	3.35858	4.43401e+06	739471	0.797182	419.543	0.107842	161600	0.00963246	0.199367		0	10003.1	87505.6	1.27285e+06	15020.2	79.4294	96.8013	49.0163	0	1.01651	477.581	3972.74	3869.65	10.3149	23.6229	0	199.72	0	4.87613e+06
12	2002	2015	1	0	0	0.2376	6.17747	3.89634	4.07929e+06	1.43077e+06	0.780745	422.107	0.178366	161600	0.0100733	0.197988		0	9735.21	84438.6	1.2775e+06	16844	79.3098	89.6775	51.8216	0	1.01694	506.414	10872.8	6664.52	11.8167	30.9011	0	253.781	0	5.05507e+06
12	2003	2015	1	0	0	0.241067	6.20099	4.43409	3.72458e+06	2.12206e+06	0.764309	424.672	0.248891	161600	0.0105142	0.196608		0	9467.28	81371.7	1.28215e+06	18667.7	79.1902	82.5536	54.627	0	1.01738	535.248	17772.9	9459.38	13.3186	38.1793	0	307.842	64.1668	5.23401e+06
12	2004	2015	1	0	0	0.244535	6.22451	4.97185	3.36987e+06	2.81336e+06	0.747873	427.236	0.319415	161600	0.0109551	0.195229		0	9199.35	78304.8	1.2868e+06	20491.4	79.0706	75.4298	57.4323	48.3346	1.01782	564.082	24673	12254.2	14.8205	45.4575	0	361.902	136.808	5.41295e+06
12	2005	2015	1	0	0	0.248003	6.24803	5.5096	3.01516e+06	3.50465e+06	0.731436	429.801	0.389939	161600	0.0113959	0.193849		9061.56	8931.41	75237.8	1.29144e+06	22315.1	78.951	68.306	60.2376	121.175	1.01826	592.915	31573.1	15049.1	16.3224	52.7358	0	415.963	209.449	5.59189e+06
12	2006	2015	1	0	0	0.253169	6.29239	5.72733	113.307	4097582	0.693	417.797	0.347571	161600	0.0118368	0.192469		35061.5	7984.18	69062.6	797507	28520.8	76.1273	45.0736	59.8051	245.178	1.03473	581.313	36324	17844	17.8242	60.014	0	470.024	282.091	5.77083e+06
12	2007	2015	1	0	0	0.250735	6.30615	6.52243	9.75467e+06	4690028	0.679	422.501	0.330949	161600	0.0122776	0.19109		43879.3	8517.05	67749.6	840498	24525.4	77.0793	50.0784	65.4194	276.387	0.995047	670.163	43462.3	21081	20.34	71.5942	0	480.548	379.017	5.80806e+06
12	2008	2015	1	0	0	0.260135	6.30996	7.36905	112.221	5857551	0.71	427.241	0.335398	161600	0.0127185	0.18971		54856.6	8134.07	63771.2	1.00161e+06	21683.4	78.7751	56.2903	69.1482	334.449	0.977898	717.338	52754.7	23168.2	20.9601	74.9442	0	548.718	422.795	5.88064e+06
12	2009	2015	1	0	0	0.265596	6.36275	7.96439	111.902	5259359	0.639	430.016	0.999679	161600	0.0131594	0.188331		72444.9	7705.22	58580	1.03232e+06	18974.5	78.8716	59.3137	71.8611	404.53	1.04393	694.423	55218.9	26222.7	21.7966	79.7971	0	597.015	500.241	5.44026e+06
12	2010	2015	1	0	0	0.261458	6.363	8.29983	113.432	6401378	0.645	435.911	0.99299	161600	0.0130497	0.175949		89042.4	7935.92	59520	1.22768e+06	18776.1	82.141	70.4389	77.0939	453.781	1.04934	741.85	64029.4	28720.6	22.5665	84.324	0	703.665	568.741	7.03306e+06
12	2011	2015	1	0	0	0.26709	6.36238	8.49528	112.374	7998671	0.66	550.873	0.990383	161600	0.0141463	0.184687		99551.2	7734.08	65414.5	2.60249e+06	51294.5	76.5802	0	79.3297	537.299	1.04511	743.569	75882.7	32145	24.2132	93.1664	2.18593e+06	806.969	639.637	7.18408e+06
12	2012	2015	1	0	0	0.266736	6.37823	9.30294	110.769	9075401	0.643	441.512	0.990127	161600	0.0146282	0.201541		121777	7274.26	59491.8	2.26928e+06	48979.9	78.3541	0	83.5111	602.098	1.04486	791.278	86874.7	34629.8	26.4125	102.345	2.49915e+06	862.677	693.859	7.25244e+06
12	2013	2015	1	0	0	0.28564	6.40233	9.95661	109.596	10169959	0.63	441.241	0.992699	161600	0.0154208	0.186375		143483	7086.1	53915.9	2.3351e+06	38751.7	81.4615	0	74.6039	696.352	0.966334	852.035	95421	37252.1	30.2453	116.211	2.84314e+06	902.384	777.188	7.44149e+06
12	2014	2015	1	0	0	0.276394	6.45332	10.2018	108.165	11187864	0.612	445.286	0.990786	161600	0.0162252	0.178112		162107	6782.45	55073	2.40613e+06	43354.9	82.5167	0	89.8465	758.307	1.01828	880.639	100278	39517.6	30.7268	120.152	2.92794e+06	922.575	861.239	7.5993e+06
12	2015	2015	1	1	1	0.293633	6.50189	10.895	107.591	10390002	0.563	444.56	0.99673	161600	0.0147798	0.177048		179568	6572.47	48701.5	0	48312.2	80.1238	0	90.4455	819.73	1.03047	858.07	93665.4	43138.7	32.28	128.96	3.37529e+06	917.443	944.597	7.16127e+06
12	2016	2015	1	1	1	0.276313	6.54838	11.3627	107.104	9048867	0.487	440.133	0.97661	161600	0.0162098	0.175976		191845	4836.31	23918.7	0	22658.6	68.5373	0	86.7022	1012.29	1.02373	894.418	98799.9	46281.5	31.3048	128.947	3.58588e+06	931.577	1028.87	6.74937e+06
12	2017	2015	1	1	1	0.289615	6.53029	11.9626	0	1.18002e+07	0.5342	460.576	1.23623	161600	0.0166863	0.177294		207959	5716.24	38434.7	1.34721e+06	44199.8	77.5159	0	93.9017	995.261	1.02351	938.92	114374	48587.5	34.3449	140.074	4.38781e+06	1064.69	1081.15	7.73916e+06
12	2018	2015	1	1	1	0.293083	6.55382	12.5004	0	1.24915e+07	0.517764	463.14	1.30675	161600	0.0171271	0.175915		224534	5448.31	35367.7	1.35186e+06	46023.5	77.3963	0	96.7071	1068.1	1.02395	967.754	121274	51382.3	35.8468	147.353	4.86891e+06	1118.75	1153.79	7.9181e+06
12	2019	2015	1	1	1	0.296551	6.57734	13.0382	0	1.31828e+07	0.501327	465.705	1.37728	161600	0.017568	0.174535		241109	5180.38	32300.8	1.35651e+06	47847.2	77.2767	0	99.5124	1140.94	1.02439	996.588	128175	54177.2	37.3487	154.631	5.35002e+06	1172.81	1226.43	8.09704e+06
13	2000	2015	1	0	0	0.811427	5.22935	4.83013	864630	0	0.135293	387.666	0	0	0.00255319	0.195309		0	1447.2	17131.9	0	19137	85.516	67.9686	69.9179	0	0.987757	0	0	0	3.22871	0	0	0	0	0
13	2001	2015	1	0	0	0.781022	5.29609	5.38166	800592	0	0.151752	387.462	0	0	0.00260027	0.194415		0	1362.09	16031.1	0	17892.9	84.6836	63.2691	70.3409	0	0.990353	0	0	0	3.85709	0	0	0	0	0
13	2002	2015	1	0	0	0.750616	5.36283	5.93318	736553	0	0.16821	387.258	0	0	0.00264736	0.19352		0	1276.98	14930.3	0	16648.8	83.8513	58.5695	70.7639	0	0.992948	0.543403	0	46.1202	4.48546	3.06936	0	0	10.3416	0
13	2003	2015	1	0	0	0.720211	5.42957	6.4847	672515	107078	0.184669	387.054	0.041293	0	0.00269444	0.192625		0	1191.87	13829.5	0	15404.7	83.0189	53.87	71.1869	0	0.995544	6.29895	0	2906.69	5.11383	6.71268	0	0	20.7374	0
13	2004	2015	1	0	0	0.689805	5.49632	7.03622	608476	515010	0.201128	386.85	0.133017	0	0.00274153	0.191731		0	1106.76	12728.8	0	14160.6	82.1865	49.1705	71.6099	0	0.998139	12.0545	0	5767.26	5.7422	10.356	0	0	31.1332	0
13	2005	2015	1	0	0	0.6594	5.56306	7.58774	544438	922941	0.217587	386.646	0.224741	0	0.00278861	0.190836		0	1021.65	11628	0	12916.5	81.3542	44.4709	72.0329	0	1.00073	17.81	0	8627.83	6.37057	13.9993	0	0	41.5291	0
13	2006	2015	1	0	0	0.619922	5.71904	8.14474	113.3	1460812	0.211526	370.45	0.157862	29900	0.0028357	0.189941		5925.22	645	10610	8904	15677	61.03	33.8	30.65	56.735	1.01945	28.2224	47	11488.4	6.99894	17.6426	0	16.5853	51.9249	3642.21
13	2007	2015	1	0	0	0.644021	5.66026	8.68514	1761156	1761156	0.227691	374.22	0.164235	4218.51	0.00288278	0.189047		8181.99	735	8683	1030	7867	54	42.99	65.93	56.437	0.991829	37.8815	67	14645.8	8.41	24.9644	0	40.1191	62.7324	14767
13	2008	2015	1	0	0	0.685621	5.62111	9.46234	111	2137624	0.239471	398.57	0.17475	49087.2	0.00292987	0.188152		11084	983	8754	4152	8109	64.15	24.25	90.05	64.621	0.976785	44.4747	51	16252.1	8.72	24.6663	0	48.1621	69.4375	28659.2
13	2009	2015	1	0	0	0.49353	5.90362	9.6255	114.5	2383161	0.292175	401.18	0.99676	93956	0.00297695	0.187257		18622	980	8786	4556	8407	98.3	25.27	72.95	110.855	1.04138	35.3422	64	20892	9.19	26.78	0	66.2199	88.3612	24944.2
13	2010	2015	1	0	0	0.463459	5.91209	9.97771	115.1	2809074	0.323737	388.01	1.01698	78160	0.00306414	0.174988		25270	827	8676	1240	8681	94	52.7	76.19	124.44	1.00813	33.4583	102	22739.7	9.08	28.36	0	87.4305	96.0158	30305.1
13	2011	2015	1	0	0	0.418143	5.95392	10.77	115	3433939	0.359966	389.4	0.998202	127430	0.00300252	0.157504		32022.1	342	2038	89	1894	96.9	0	99.08	129	1.03276	36.4082	831	25141.6	8.9	34.5456	1.1941e+06	121.408	103.143	14537.2
13	2012	2015	1	0	0	0.35035	5.97082	11.6817	112.6	3904003	0.366163	390	0.998205	200592	0.00309429	0.241236		48097	303	1996	132	2338	95.7	0	99.12	140	1.02801	47.2729	1100	29168.1	9.19	36.1634	1.42644e+06	142.539	110.634	67036.1
13	2013	2015	1	0	0	0.400354	6.14412	12.4735	110	4159422	0.375797	390.2	0.999744	273500	0.0032855	0.180046		65101	347	1968	1350	2481	95.7	0	99.31	152.5	1.02771	70.6541	0	32612.4	11.55	46.5547	1.36813e+06	158.852	120.683	73788.5
13	2014	2015	1	0	0	0.389098	6.21059	12.6081	108.5	4566596	0.386765	383.1	1.00914	330371	0.00310383	0.182235		84776.6	294	1709	193229	2547	95.18	0	90	240	0.973193	86.2832	2076	34543.6	12.4341	51.5647	1.66678e+06	171.02	134.84	83345.4
13	2015	2015	1	1	1	0.390554	6.24517	12.8899	107.9	5013438	0.354886	379.52	1.00472	390502	0.00331397	0.175301		103030	165	2037	0	1971	85	0	97	350	1.03233	63.0103	2476	35156.3	13.5953	55.2608	1.97356e+06	187.575	147.237	95146.5
13	2016	2015	1	1	1	0.391579	6.25778	13.547	107.8	5446605	0.341552	375	1.00533	442911	0.00329279	0.17444		119457	0	0	0	0	0	0	0	432.6	1.0478	92.7685	1973	41063.8	13.4804	47.9489	2.10136e+06	199.7	157.936	63476.3
13	2017	2015	1	1	1	0.294533	6.36395	14.206	0	5.81812e+06	0.415092	384.199	1.32543	452906	0.00335363	0.1801		117447	0.345455	0	47393.1	0	71.3658	0	77.1089	369.484	1.03188	86.8765	2228.51	42954.7	13.911	57.7191	2.4863e+06	228.02	166.279	95558.9
13	2018	2015	1	1	1	0.264127	6.43069	14.7575	0	6.22605e+06	0.43155	383.995	1.41715	497775	0.00340071	0.179205		129119	0	0	52039.2	0	70.5335	0	77.5319	402.926	1.03448	92.6321	2466.79	45815.2	14.5394	61.3624	2.76144e+06	247.241	176.675	103915
13	2019	2015	1	1	1	0.233722	6.49743	15.309	0	6.63398e+06	0.448009	383.791	1.50888	542643	0.0034478	0.178311		140791	0	0	56685.3	0	69.7011	0	77.9549	436.367	1.03707	98.3876	2705.07	48675.8	15.1678	65.0058	3.03658e+06	266.463	187.071	112271
14	2000	2015	1	0	0	0.200292	5.8958	3.2467	1.12234e+06	0	0.335345	210.095	0.107157	0	0.00564717	0.231961		0	2354.09	21409.1	154936	23023.6	94.2624	2.04273	2.43291	0	0.979197	0	0	0	8.13735	15.4609	0	0	0	48728.7
14	2001	2015	1	0	0	0.201113	5.92158	3.63596	1.03922e+06	0	0.345667	209.203	0.173611	0	0.00556554	0.226284		0	2294.27	20722.5	168306	22009.1	93.8082	1.94545	6.33727	0	0.981615	0	0	0	8.54791	17.1028	0	0	4.54727	50143.4
14	2002	2015	1	0	0	0.201933	5.94736	4.02521	956087	0	0.355989	208.311	0.240066	0	0.00548391	0.220607		0	2234.45	20035.8	181676	20994.6	93.354	1.84818	10.2416	0	0.984034	13.8626	0	1484.07	8.95846	18.7447	0	15.9964	19.8366	51558.1
14	2003	2015	1	0	0	0.202754	5.97314	4.41446	872958	255258	0.366311	207.419	0.30652	0	0.00540228	0.21493		0	2174.64	19349.2	195046	19980.1	92.8998	1.75091	14.146	0	0.986453	27.7471	0	3720.49	9.36902	20.3865	0	35.8262	35.1258	52972.8
14	2004	2015	1	0	0	0.203575	5.99892	4.80372	789830	843390	0.376633	206.527	0.372975	0	0.00532065	0.209253		427.386	2114.82	18662.6	208416	18965.6	92.4456	1.65364	18.0504	0	0.988871	41.6316	0	5956.9	9.77957	22.0284	0	55.6561	50.4151	54387.5
14	2005	2015	1	0	0	0.204395	6.02469	5.19297	706701	1.43152e+06	0.386954	205.635	0.439429	22398.3	0.00523902	0.203576		6213.91	2055	17975.9	221786	17951.1	91.9915	1.55636	21.9547	23.8747	0.99129	55.5161	0	8193.31	10.1901	23.6702	0	75.4859	65.7044	55802.3
14	2006	2015	1	0	0	0.14203	6.00711	5.44938	115	1900399	0.380446	202.4	0.397875	67400	0.00515739	0.197899		13147.4	1456	17152	135383	17285	90.76	0	0	51.579	0.980137	89.8576	963	10429.7	10.6007	25.3121	0	95.3157	80.9937	57217
14	2007	2015	1	0	0	0.190328	6.08419	6.13339	2286120	2286120	0.406365	202.93	0.397526	100648	0.00507576	0.192222		18393.4	1480	16944	146055	15913	95.45	0	88.69	61.786	0.992479	128.95	1895	13900.5	10.94	27.27	0	92.8393	84.655	52741.3
14	2008	2015	1	0	0	0.162765	6.13025	6.38923	116	2907212	0.391991	202.9	0.39793	139773	0.00499413	0.186545		26206.9	1500	15870	147434	17437	95.14	0	88.69	78.495	0.995226	143.563	2651	15229.8	10.98	29.3438	0	107.614	106.433	68860.8
14	2009	2015	1	0	0	0.234603	6.18512	6.75325	113.6	3533626	0.420644	203.17	0.999409	178898	0.0049125	0.180868		34852.9	2339	14133	137582	15828	93.83	0	0	112.418	1.00331	79.3303	6502	17063	11.77	29.4324	0	141.333	128.363	53331.3
14	2010	2015	1	0	0	0.31993	6.17131	7.30719	113.8	4451802	0.452633	202.64	1.00133	180131	0.00508305	0.158967		30030.1	2052	13608	96111	9408	80.76	10.7	0	162.653	1.04465	83.1023	7750	19029.8	12.6	31.2069	0	185.483	147.534	50782.7
14	2011	2015	1	0	0	0.299446	6.13679	7.35781	113.8	5545757	0.4876	202.5	1.00049	245726	0.00466585	0.155232		34448.9	2639	15046	745203	9826	80.61	0	39.35	179.703	0.960253	99.4168	8741	21255.4	12.68	33.4344	1.00484e+06	236.177	160.18	67039.1
14	2012	2015	1	0	0	0.190977	6.17216	7.65094	112	6155007	0.472804	200	1.0065	310287	0.0042976	0.205667		43663.4	1922	19632	908070	8175	85.85	0	0	229	1.0188	116.054	10170	23813.4	13.03	35.3922	1.21483e+06	247.727	182.075	95586.2
14	2013	2015	1	0	0	0.191382	6.23387	8.47335	108.3	6923486	0.473721	199.1	1.00251	369609	0.00455467	0.16474		50876	1764	1870	381319	8481	95.1	0	40.84	252.1	1.04545	121.273	12484	24100.2	14.08	37.091	1.29464e+06	272.112	206.396	63038.8
14	2014	2015	1	0	0	0.197738	6.25048	8.77869	106.5	6861811	0.539362	197.8	1.00303	413952	0.00462935	0.145611		58713.8	1885	15571	624897	11919	94.16	0	77.48	280	1.00137	150.412	14209	26135.3	14.3508	38.2358	1.48792e+06	259.376	205.514	68191.4
14	2015	2015	1	1	1	0.194321	6.25968	8.95509	106.3	6996822	0.466212	196.67	1.00275	401809	0.00465054	0.142264		67027	1355	15554	0	10198	70.4	0	84.51	270	1.05098	220.476	15907	31681.2	14.0205	40.017	1.62887e+06	255.552	210.93	61577.2
14	2016	2015	1	1	1	0.178982	6.34204	9.56516	106.9	7001392	0.445963	193	1.01036	420400	0.00422079	0.134645		72904	265	7038	0	6034	99.87	0	79.63	250	0.971169	294.618	17512	35091.4	14.136	41.9997	1.74966e+06	245.584	218.768	68829.8
14	2017	2015	1	1	1	0.214242	6.33404	9.86402	0	8.4891e+06	0.510817	194.931	1.23688	491899	0.00425946	0.135453		75652.2	1337.18	9736.42	382224	5776.95	86.5413	0.389091	68.8071	326.622	1.02031	222.13	19226.8	35030.3	15.1168	43.3725	2.12749e+06	313.444	249.176	72778.8
14	2018	2015	1	1	1	0.215062	6.35981	10.2533	0	9.07723e+06	0.521139	194.039	1.30334	531024	0.00417783	0.129776		81438.7	1277.36	9049.79	395594	4762.44	86.0871	0.291818	72.7115	351.851	1.02273	236.014	20934.5	37266.7	15.5273	45.0144	2.36193e+06	333.274	264.465	74193.5
14	2019	2015	1	1	1	0.215883	6.38559	10.6425	0	9.66537e+06	0.531461	193.147	1.36979	570149	0.0040962	0.124099		87225.3	1217.55	8363.16	408964	3747.93	85.6329	0.194545	76.6158	377.08	1.02515	249.899	22642.3	39503.1	15.9379	46.6563	2.59637e+06	353.103	279.754	75608.2
15	2000	2015	1	0	0	0.106272	6.10282	3.32096	1.16574e+06	0	0.532465	135.171	0.518902	0	0.000988203	0.125505		0	1389.67	54181.2	584828	66602.5	0	4.22291	145.037	0	1.04822	76.1751	0	1444.55	7.00526	8.5559	0	12.5395	0	112117
15	2001	2015	1	0	0	0.104207	6.12781	3.75527	1.0794e+06	0	0.536703	134.495	0.55484	0	0.00140573	0.126571		0	1395.27	51228.2	597394	62742.1	0	4.02182	137.337	0	1.04388	86.7223	0	3674.02	7.14774	10.9337	0	33.9407	0	114401
15	2002	2015	1	0	0	0.102142	6.15279	4.18959	993055	0	0.540941	133.82	0.590778	0	0.00182325	0.127637		0	1400.87	48275.1	609960	58881.7	0	3.82073	129.637	0	1.03953	97.2695	0	5903.48	7.29023	13.3114	0	55.3419	11.2963	116684
15	2003	2015	1	0	0	0.100077	6.17777	4.62391	906712	395181	0.545179	133.145	0.626715	0	0.00224078	0.128704		2442.54	1406.47	45322.1	622527	55021.3	4.79236	3.61964	121.937	11.4054	1.03519	107.817	0	8132.95	7.43271	15.6892	0	76.743	25.3776	118967
15	2004	2015	1	0	0	0.0980113	6.20276	5.05822	820369	960337	0.549417	132.47	0.662653	38649.1	0.0026583	0.12977		7452.16	1412.07	42369.1	635093	51160.9	9.63036	3.41855	114.237	27.9504	1.03085	118.364	0	10362.4	7.57519	18.067	0	98.1442	39.4588	121251
15	2005	2015	1	0	0	0.0959461	6.22774	5.49254	734026	1.52549e+06	0.553654	131.794	0.698591	79220.4	0.00307583	0.130836		12461.8	1417.67	39416	647659	47300.5	14.4684	3.21745	106.537	44.4954	1.02651	128.911	0	12591.9	7.71768	20.4447	0	119.545	53.54	123534
15	2006	2015	1	0	0	0.0601481	6.22955	6.08365	115	1919006	0.539863	129.98	0.674411	78100	0.00349335	0.131903		13072.5	1252	36862	246166	47518	24.16	0	93.3	51.9	1.03045	105.629	2404	14821.4	7.86016	22.8225	0	140.946	67.6213	125817
15	2007	2015	1	0	0	0.080647	6.24926	6.15427	2374523	2374523	0.54453	129.92	0.673876	160363	0.00391088	0.132969		21186.2	1289	34018	330889	43767	30.3	0	92.9	61.794	1.02317	132.353	7263	17249.5	7.26	20.7804	0	129.245	75.1537	149472
15	2008	2015	1	0	0	0.0839777	6.32547	6.86154	116	3003488	0.561247	129.68	0.682989	200934	0.0043284	0.134036		30021.2	1181	29289	571532	41990	21.28	0	93.65	83.324	1.01161	153.321	9386	19317.5	7.33	24.928	0	159.165	90.9555	141335
15	2009	2015	1	0	0	0.10097	6.368	7.49513	113.6	3566348	0.565088	129.72	0.999923	241506	0.00474593	0.135102		40668.7	1608	30543	562280	38074	35.43	0	94.87	116.401	0.967413	139.385	6110	20876.8	8.79	28.0629	0	191.648	110.797	90916.6
15	2010	2015	1	0	0	0.128828	6.34144	7.66164	113.8	4331670	0.600944	128.7	1.00396	252708	0.00520695	0.117106		34616.7	1984	24097	1213714	13730	43.32	22.12	86.36	150	1.04544	228.977	13477	24318.5	8.9	32.6863	0	239.614	118.591	116397
15	2011	2015	1	0	0	0.153767	6.39933	7.72714	113.8	5314342	0.597184	128.5	1.00078	355308	0.00384599	0.116343		40994	1652	19900	1201693	11891	33.33	0	85.39	151.8	0.981957	237.113	15358	26190.7	10.68	40.0184	1.11253e+06	277.194	144.677	155763
15	2012	2015	1	0	0	0.0502375	6.4276	8.62731	112	6430212	0.603847	127.9	1.00235	436304	0.00496171	0.172752		50223.3	1461	22552	1179714	11426	39.71	0	0	181	0.996757	245.279	8373	28424.2	8.07	39.9947	1.19257e+06	330.51	171.222	179667
15	2013	2015	1	0	0	0.0562874	6.42077	8.82271	108.3	6736447	0.594535	127.1	1.00315	463180	0.008849	0.163738		50480	1259	2800	1133072	10600	63.6	0	0	181.2	0.979194	237.259	20935	29538.1	8.64	47.7681	1.13798e+06	332.278	177.569	114136
15	2014	2015	1	0	0	0.0703509	6.42251	9.40169	106.5	6752889	0.62936	126.3	1.00317	442513	0.0105493	0.149363		56080.3	1526	19253	1514562	23603	52.4	0	5.49	200	1.02811	241.393	23970	32000.2	8.9075	45.1186	1.12376e+06	324.526	176.05	119012
15	2015	2015	1	1	1	0.064446	6.4403	9.67015	106.3	6685521	0.589034	125.37	1.00359	447965	0.00508163	0.131559		64100	1542	14123	0	14173	46.56	0	26.99	204	0.961949	225.688	26840	35723.4	8.892	46.7246	1.26384e+06	304.142	182.131	149892
15	2016	2015	1	1	1	0.0694402	6.52977	10.5777	106.9	6966243	0.544266	122	1.0082	470252	0.00641755	0.124711		66272	1210	5239	0	8747	88.37	0	84.74	200	0.979037	167.747	29860	37195.2	8.9687	32.9198	1.40626e+06	298.207	203.535	167167
15	2017	2015	1	1	1	0.0711629	6.52753	10.7043	0	8.30736e+06	0.604509	123.691	1.12984	566077	0.00808612	0.143633		72577.3	1484.87	3979.6	798454	975.691	72.5244	0.804364	14.1344	243.035	0.974414	255.478	30391.6	39345.5	9.42748	48.9779	1.74423e+06	376.359	222.515	150934
15	2018	2015	1	1	1	0.0690976	6.55251	11.1387	0	8.87252e+06	0.608747	123.016	1.16578	606648	0.00850365	0.144699		77586.9	1490.47	1026.56	811020	0	77.3624	0.603273	6.43418	259.58	0.970073	266.025	32972.4	41575	9.56996	51.3556	1.92978e+06	397.76	236.596	153217
15	2019	2015	1	1	1	0.0670323	6.5775	11.573	0	9.43767e+06	0.612985	122.341	1.20172	647219	0.00892117	0.145766		82596.5	1496.07	0	823587	0	82.2004	0.402182	0	276.125	0.965732	276.573	35553.2	43804.4	9.71245	53.7334	2.11533e+06	419.162	250.677	155501
16	2000	2015	1	0	0	0.00248656	6.14971	1.89852	1.01881e+06	87370.1	0.646529	173.86	0	0	0.00447559	0.24965		0	2849.4	194218	582060	18883.1	0	69.2444	22.803	0	1.04192	552.763	376.636	7885.31	4.95246	15.4986	0	107.158	0	416460
16	2001	2015	1	0	0	0.0161486	6.16861	2.50658	943348	393562	0.636256	174.266	0	0	0.00456448	0.245605		0	2697.18	185500	627294	18281.6	0	64.5245	27.3545	0	1.04016	555.024	371.182	10124.7	5.22449	16.0486	0	112.03	0	407457
16	2002	2015	1	0	0	0.0298106	6.18752	3.11464	867888	699754	0.625984	174.673	0.0589768	0	0.00465337	0.24156		0	2544.96	176781	672527	17680.2	0	59.8047	31.9061	0	1.03839	557.284	365.727	12364.1	5.49652	16.5986	0	116.903	9.99261	398453
16	2003	2015	1	0	0	0.0434726	6.20643	3.7227	792429	1.00595e+06	0.615711	175.079	0.140727	0	0.00474226	0.237515		0	2392.75	168062	717761	17078.8	3.176	55.0849	36.4576	0	1.03663	559.544	360.273	14603.4	5.76855	17.1486	0	121.776	20.5368	389450
16	2004	2015	1	0	0	0.0571346	6.22534	4.33076	716970	1.31214e+06	0.605439	175.486	0.222477	5662.71	0.00483115	0.23347		0	2240.53	159343	762995	16477.4	8.71218	50.3651	41.0092	0	1.03486	561.805	354.818	16842.8	6.04058	17.6985	0	126.648	31.0809	380446
16	2005	2015	1	0	0	0.0707967	6.24424	4.93882	641511	1.61833e+06	0.595166	175.892	0.304227	30036	0.00492004	0.229425		0	2088.31	150624	808229	15876	14.2484	45.6453	45.5607	0	1.0331	564.065	349.364	19082.2	6.3126	18.2485	0	131.521	41.625	371443
16	2006	2015	1	0	0	0.0885056	6.32365	5.06179	111.4	1757102	0.54237	174.54	0.244357	55900	0.00500893	0.22538		7623.18	1865	138401	438407	13232	25.02	24.33	67.57	32.954	1.05667	490.038	168	21321.6	6.58463	18.7985	0	136.393	52.1692	362439
16	2007	2015	1	0	0	0.103047	6.28197	6.01864	2075226	2075226	0.555602	176.34	0.249802	78782.6	0.00509782	0.221335		9096.35	1244	135685	695747	15417	40.53	38.94	51.52	41.09	1.04393	481.099	0	20830	6.97	19.6825	0	115.32	65.4941	341184
16	2008	2015	1	0	0	0.109063	6.29153	6.86385	110.1	2442835	0.563976	178.06	0.25424	103156	0.00518671	0.21729		11109.5	1767	119510	724411	11673	28.79	39.16	51.52	54.36	0.988459	556.501	0	24983.5	6.89	18.8033	0	130.1	71.9702	317035
16	2009	2015	1	0	0	0.119218	6.31069	7.15916	110.3	2653311	0.552593	179.55	0.995879	127529	0.0052756	0.213245		14828.3	1956	114199	516608	13870	23.46	36.13	62.03	62.775	1.05306	554.847	0	28964.4	7.38	19.8839	0	139.429	81.6239	229370
16	2010	2015	1	0	0	0.114857	6.32969	8.06356	111.8	3111826	0.549915	180.39	0.997672	118411	0.00410222	0.213043		18911.2	1463	110014	719634	14027	34.75	52.03	60.61	75.468	0.992227	676.097	0	31400.1	7.59	20.6016	0	157.526	94.2752	285004
16	2011	2015	1	0	0	0.200742	6.33468	8.97459	112.5	3758008	0.574031	179.4	1.00279	171166	0.00625852	0.200632		22137.5	1439	119912	1921272	15288	38.69	0	66.76	92.807	1.02065	698.269	3075	34768.9	7.88	21.3749	737263	188.5	103.03	539593
16	2012	2015	1	0	0	0.140248	6.33566	9.89863	112.6	4337651	0.57311	175.7	1.01081	240912	0.00591712	0.206362		32088.4	1046	106941	2299400	12155	50	0	74.35	105.512	0.965014	654.521	240	37427.4	8	22.0865	960588	211.617	116.277	283685
16	2013	2015	1	0	0	0.181951	6.36565	10.2756	110.8	4633061	0.546348	177	0.99661	241102	0.00562957	0.187006		35201.8	613	10226	2103982	13077	55.99	0	83.72	121.648	1.03167	679.757	0	36678.9	9.15	26.3055	976847	210	130.159	401330
16	2014	2015	1	0	0	0.188178	6.38544	10.6271	108.9	4476423	0.560827	177.9	0.997752	259975	0.00722178	0.192517		42844.4	565	98142	2456487	10486	74	0	89.88	136.483	1.05976	610.129	0	37909.4	9.0557	24.4667	934986	183.519	134.617	368823
16	2015	2015	1	1	1	0.203887	6.44957	10.6685	108.1	4342749	0.447297	180.76	0.992089	254908	0.00485875	0.198718		47446	569	91141	0	9894	74.19	0	95.65	153.9	1.05991	529.124	0	41069.3	9.1818	23.2441	1.04973e+06	155.828	145.202	127273
16	2016	2015	1	1	1	0.230758	6.52601	10.8477	107.6	4422085	0.402765	182	1	287191	0.00543016	0.18118		52838.2	398	37245	0	5823	76.7	0	97.96	240.9	0.976297	423.521	0	42349.7	8.7104	21.7852	1.26425e+06	140.087	158.971	235896
16	2017	2015	1	1	1	0.234741	6.47113	12.2356	0	5.29263e+06	0.471895	180.77	1.28523	322515	0.00598672	0.180886		55571.5	261.691	45997.1	1.35103e+06	8658.95	80.6825	0	100.179	204.452	1.01193	591.19	283.909	45954.7	9.57695	24.8483	1.47754e+06	189.992	168.155	263400
16	2018	2015	1	1	1	0.248403	6.49004	12.8436	0	5.59882e+06	0.461622	181.176	1.36698	346889	0.00607561	0.176841		60376.9	109.473	37278.2	1.39627e+06	8057.53	86.2187	0	104.731	221.59	1.01017	593.45	278.455	48194.1	9.84898	25.3983	1.63848e+06	194.864	178.699	254396
16	2019	2015	1	1	1	0.262065	6.50894	13.4517	0	5.90501e+06	0.45135	181.583	1.44873	371262	0.00616451	0.172796		65182.4	0	28559.3	1.4415e+06	7456.11	91.7549	0	109.282	238.727	1.0084	595.711	273	50433.5	10.121	25.9483	1.79942e+06	199.737	189.243	245392
17	2000	2015	1	0	0	0.304675	5.79528	0.799342	1.71999e+06	0	0.494033	361.994	0	0	0.00443143	0.231854		0	2734.57	103514	0	33164.3	0	13.5603	0	0	1.01195	240.275	2825.92	5527.33	7.73054	11.3088	0	0	0	0
17	2001	2015	1	0	0	0.317747	5.81704	1.42137	1.59259e+06	0	0.497095	365.524	0	0	0.00477032	0.229567		0	2870.73	100075	0	32050.5	2.20818	12.7736	0	0	1.01109	241.23	2678.27	7705.99	8.22462	13.7554	0	0	0	0
17	2002	2015	1	0	0	0.33082	5.8388	2.0434	1.46519e+06	0	0.500157	369.054	0	0	0.0051092	0.227281		0	3006.88	96635.3	74977.3	30936.8	4.57645	11.987	0	4.28807	1.01024	242.184	2530.63	9884.65	8.71871	16.2019	0	15.5934	0	0
17	2003	2015	1	0	0	0.343893	5.86056	2.66543	1.33779e+06	95876.1	0.503219	372.583	0	0	0.00544809	0.224994		0	3143.04	93196	177014	29823	6.94473	11.2004	0	30.7253	1.00938	243.139	2382.98	12063.3	9.21279	18.6484	0	47.4073	12.4173	0
17	2004	2015	1	0	0	0.356966	5.88232	3.28746	1.21039e+06	914417	0.506281	376.113	0.0926207	20848.5	0.00578697	0.222708		7792.99	3279.19	89756.7	279050	28709.3	9.313	10.4137	0	57.1626	1.00853	244.094	2235.34	14242	9.70687	21.0949	0	79.2212	31.0199	0
17	2005	2015	1	0	0	0.370038	5.90408	3.90949	1.08299e+06	1.73296e+06	0.509343	379.643	0.18779	85881.6	0.00612586	0.220422		16585	3415.35	86317.4	381086	27595.5	11.6813	9.62709	0	83.5998	1.00767	245.048	2087.69	16420.6	10.201	23.5414	0	111.035	49.6226	0
17	2006	2015	1	0	0	0.395049	5.91958	4.49201	113.5	2972745	0.50159	378.8	0.127614	201900	0.00646475	0.218135		24992.4	4379	105576	895134	46336	36.85	0	0	91.526	1.01145	126.058	466	18599.3	10.695	25.988	0	142.849	68.2252	54205.3
17	2007	2015	1	0	0	0.37875	5.93721	5.27094	3503547	3503547	0.503747	385.9	0.12568	215948	0.00680363	0.215849		29365.6	4655	84774	379000	36115	0	10.85	5.93	100.408	1.00054	221.099	1014	21432.6	11.78	29.2059	0	176.474	96.2775	334074
17	2008	2015	1	0	0	0.414134	5.95627	5.76566	112.8	4162366	0.522804	392.37	0.124933	280981	0.00714252	0.213562		32545.1	4018	102301	683812	16508	20.02	0	15.27	133.135	0.966178	320.787	4425	24576	11.63	30.1904	0	205.485	104.393	320792
17	2009	2015	1	0	0	0.391566	6.03334	6.62872	113.9	4528599	0.498565	398.57	0.992222	346014	0.0074814	0.211276		53015	0	0	0	0	0	0	0	298.985	1.01114	270.306	1955	26065.4	12.01	39.8353	0	214.719	129.624	242752
17	2010	2015	1	0	0	0.45902	6.0404	6.72812	114.2	5635071	0.557189	405.62	0.991322	338629	0.00486222	0.194858		63970.8	4698	80179	198304	10150	25.13	43.13	27.8	214.725	1.05739	297.693	2161	26857.4	12.52	33.1734	0	280.849	141.41	245962
17	2011	2015	1	0	0	0.488452	6.01444	7.62305	112.3	6567051	0.544902	385.3	0.996626	396856	0.00694442	0.200284		76401	0	0	0	0	0	0	100	264.048	0.977593	275.615	0	28221.1	12.92	18.72	1.42711e+06	312.537	151.307	241931
17	2012	2015	1	0	0	0.427648	6.05064	8.16022	111.3	7552415	0.548448	408.6	0.999266	565801	0.011912	0.237624		100007	8204	95939	2358877	31242	58.43	0	48.28	273.6	1.04798	280.763	1007	30116.3	13.22	51.9544	1.82896e+06	352.574	173.587	273335
17	2013	2015	1	0	0	0.475185	6.04676	9.036	110.2	8038711	0.538138	411.7	0.995871	657004	0.0105374	0.20421		84544	7393	84093	2127119	28599	49.72	0	82.1	265.13	0.969359	328.904	191	31712.4	14.2	52.7937	1.92231e+06	358.896	184.35	307209
17	2014	2015	1	0	0	0.490846	6.10726	9.36666	108.5	9179154	0.533851	412	0.999515	709103	0.012534	0.190803		89522.5	6293	90105	4284095	31330	35.58	0	100	307.1	0.971888	257.459	201	33339.4	14.5215	42.4115	2.12409e+06	398.566	218.995	364011
17	2015	2015	1	1	1	0.500622	6.12523	10.0175	108.1	9803511	0.5219	413.19	0.998596	729817	0.00786339	0.193461		102205	4200	56359	0	17944	30.01	0	96.65	324.7	1.03107	189.869	1501	39956.6	15.4276	46.2478	2.49471e+06	410.44	240.177	819865
17	2016	2015	1	1	1	0.511952	6.14987	10.9695	107.3	11143094	0.53372	417	0.995204	794829	0.00720516	0.193674		106140	2715	23172	0	11819	29.06	0	100	391.1	0.983402	189.989	299	43542	15.8959	49.9056	2.6831e+06	467.718	265.277	1.08589e+06
17	2017	2015	1	1	1	0.526912	6.16519	11.3738	0	1.15555e+07	0.546085	422.002	1.32982	866279	0.0101925	0.192985		122089	5049.2	45045.9	1.60552e+06	14230.5	40.1005	0.187455	123.371	400.847	0.997418	256.505	315.945	42564.6	16.13	52.8996	3.1947e+06	492.802	272.854	792959
17	2018	2015	1	1	1	0.539984	6.18695	11.9959	0	1.2374e+07	0.549147	425.532	1.42499	931312	0.0105314	0.190698		130881	5185.35	41606.6	1.70756e+06	13116.7	42.4688	0	135.205	427.284	0.996563	257.46	168.3	44743.2	16.624	55.3462	3.54864e+06	524.616	291.457	860118
17	2019	2015	1	1	1	0.553057	6.20871	12.6179	0	1.31925e+07	0.552209	429.062	1.52016	996345	0.0108703	0.188412		139673	5321.51	38167.3	1.80959e+06	12003	44.8371	0	147.039	453.721	0.995709	258.414	20.6545	46921.9	17.1181	57.7927	3.90258e+06	556.43	310.059	927278
18	2000	2015	1	0	0	0.0544844	6.04333	6.27091	2.01131e+06	0	0.342323	337.332	0	0	0.000123187	0.135437		0	11950.3	23254.9	512702	12415.7	85.2548	115.532	31.6106	0	1.04014	66.1904	0	0	7.81519	36.6136	0	0	0	0
18	2001	2015	1	0	0	0.0950122	6.05769	6.85009	1.86233e+06	0	0.353018	339.858	0.0103978	0	0.00306904	0.138573		0	11316.5	22630.8	485286	12273.3	86.1873	107.715	35.3627	0	1.03701	86.1086	0	2301.17	8.24344	37.4473	0	0	0	0
18	2002	2015	1	0	0	0.13554	6.07205	7.42928	1.71335e+06	0	0.363713	342.384	0.0892576	0	0.00601489	0.141709		0	10682.6	22006.8	457870	12130.9	87.1197	99.8986	39.1148	0	1.03387	106.027	0	5037.73	8.67169	38.281	0	0	0	0
18	2003	2015	1	0	0	0.176068	6.0864	8.00846	1.56438e+06	0	0.374408	344.91	0.168117	0	0.00896074	0.144845		0	10048.7	21382.7	430453	11988.5	88.0522	92.0818	42.8669	0	1.03074	125.945	0	7774.28	9.09995	39.1147	0	0	14.5749	0
18	2004	2015	1	0	0	0.216596	6.10076	8.58765	1.4154e+06	634318	0.385103	347.435	0.246977	0	0.0119066	0.147981		0	9414.81	20758.7	403037	11846.1	88.9846	84.265	46.619	0	1.02761	145.863	0	10510.8	9.5282	39.9484	0	35.7093	43.3224	0
18	2005	2015	1	0	0	0.257123	6.11512	9.16684	1.26642e+06	1.69857e+06	0.395798	349.961	0.325837	0	0.0148524	0.151117		0	8780.93	20134.6	375621	11703.7	89.9171	76.4482	50.3711	20.6584	1.02447	165.782	0	13247.4	9.95645	40.7821	0	76.7384	72.0699	0
18	2006	2015	1	0	0	0.281689	6.1811	9.60531	112.9	3590200	0.393293	352.47	0.266604	168300	0.0177983	0.154252		14071.3	8277	17708	174314	12552	88.77	45.35	55.71	113.563	1.02858	198.329	14311	15983.9	10.3847	41.6158	0	117.768	100.817	10654.6
18	2007	2015	1	0	0	0.311514	6.22989	10.5521	4096988	4096988	0.387358	355.27	0.272384	186020	0.0207441	0.157388		19759.8	7792	17135	175029	12628	86	46.39	67.19	141.5	1.03498	215.152	20158	19761.8	11.72	37.37	0	160.356	166.952	243465
18	2008	2015	1	0	0	0.322463	6.19481	10.9459	112.7	4863852	0.396167	358.31	0.279814	308564	0.02369	0.160524		25315.7	6854	17614	168544	12190	91	67.18	67.19	167.9	0.981291	229.236	23201	21102.8	11.7	50.4128	0	181.97	182.796	258392
18	2009	2015	1	0	0	0.445707	6.14321	11.6841	112.9	5320870	0.444382	360.64	0.996783	431108	0.0266358	0.16366		35571.2	5975	17432	684298	11557	98	79.9	53.9	159.6	0.99437	226.397	24069	24260.7	11.46	34.1777	0	224.86	181.851	249897
18	2010	2015	1	0	0	0.450816	6.13022	11.7871	114.6	6368877	0.472532	362.23	0.997819	429009	0.0324155	0.159706		52873.3	5742	17735	550887	9960	99.94	86.2	65.83	201.593	1.04896	248.018	27262	26426.6	11.15	42.9403	0	277.025	198.813	338696
18	2011	2015	1	0	0	0.438707	6.11181	12.4224	113.5	7802393	0.493285	365.5	0.995349	613600	0.0319128	0.176787		65091.9	4370	19004	143697	9285	99.11	0	73.99	265.5	0.972229	268.222	50757	28873.8	11.61	44.1942	1.23404e+06	336.165	219.226	434395
18	2012	2015	1	0	0	0.659103	6.13196	13.4016	112.1	8902164	0.499964	367.8	0.996737	784157	0.0344751	0.178009		87278.6	4144	18700	97634	9082	99.11	0	72.45	290.004	1.01955	295.264	80919	32728.8	12.23	55.1096	1.40178e+06	378.907	243.713	659850
18	2013	2015	1	0	0	0.73888	6.14873	13.6164	110.4	10078541	0.534486	366.6	1.00164	928392	0.0377986	0.177029		106089	4172	16970	100467	0	99.05	0	71.28	368.9	0.994843	350.294	101262	35207.3	13.89	54.1907	1.58886e+06	427.89	265.33	878422
18	2014	2015	1	0	0	0.674485	6.21402	14.5496	109.2	11511949	0.519026	371.1	0.994072	1053415	0.0365583	0.170117		124418	3037	16407	227479	14339	94.87	0	75.79	415.1	1.00379	368.189	125007	36904.8	14.3263	53.5076	1.69646e+06	485.999	305.271	1.03948e+06
18	2015	2015	1	1	1	0.637299	6.30681	14.8294	108.7	12530550	0.47961	376.35	0.993012	1196801	0.0458501	0.186937		145797	2474	15926	0	23596	96.36	0	99.09	493.1	1.02007	364.135	139197	41029.2	14.481	62.7584	1.96311e+06	482.092	371.822	1.16971e+06
18	2016	2015	1	1	1	0.542532	6.42134	15.6676	108.7	13858228	0.439537	380	0.994737	1338791	0.0499242	0.184838		166643	1917	5662	0	4154	98.42	0	99.3	568.6	0.963782	374.964	150383	44054	14.8337	27.3506	2.10816e+06	479.013	453.509	919447
18	2017	2015	1	1	1	0.743457	6.28741	16.1171	0	1.44695e+07	0.524137	380.27	1.27215	1.41146e+06	0.0502026	0.188747		171524	1174.35	12645.9	46624.7	9995.02	101.107	0	95.3962	558.498	0.986879	404.8	159865	46086	15.0955	50.7865	2.53697e+06	569.088	417.04	1.2277e+06
18	2018	2015	1	1	1	0.783985	6.30177	16.6963	0	1.55338e+07	0.534832	382.796	1.35101	1.534e+06	0.0531485	0.191882		187340	540.464	12021.9	19208.3	9852.63	102.039	0	99.1483	603.318	0.983746	424.719	175046	48822.6	15.5237	51.6202	2.81656e+06	610.117	445.787	1.33834e+06
18	2019	2015	1	1	1	0.824513	6.31613	17.2754	0	1.6598e+07	0.545527	385.321	1.42987	1.65655e+06	0.0560943	0.195018		203156	0	11397.8	0	9710.24	102.971	0	102.9	648.138	0.980613	444.637	190228	51559.1	15.952	52.4539	3.09615e+06	651.146	474.535	1.44898e+06
19	2000	2013	1	0	0	0.0121488	6.66882	2.92207	6.26995e+06	0	0.602121	207.814	0.449218	0	0.0141858	0.168487		0	5696.49	212286	3.41415e+06	16497.1	83.8251	147.727	94.785	0	1.00248	195.412	47079.8	11706.5	13.0498	60.2985	0	369.118	0	1.85238e+06
19	2001	2013	1	0	0	0.0126984	6.68676	3.44312	5.80552e+06	0	0.594479	208.972	0.489921	0	0.01416	0.165631		0	5664.91	208360	3.42961e+06	21502.1	82.2382	137.519	94.7718	0	1.00263	380.162	51881.5	14191.4	13.3717	65.5685	0	448.709	0	1.78986e+06
19	2002	2013	1	0	0	0.0132481	6.70471	3.96418	5.34109e+06	0	0.586837	210.129	0.530624	0	0.0141343	0.162775		0	5633.33	204435	3.44507e+06	26507.1	80.6513	127.311	94.7586	0	1.00278	564.912	56683.1	16676.4	13.6935	70.8385	0	528.301	81.1258	1.72734e+06
19	2003	2013	1	0	0	0.0137977	6.72265	4.48523	4.87665e+06	2.88245e+06	0.579196	211.287	0.571326	91092.9	0.0141085	0.159919		0	5601.75	200509	3.46052e+06	31512.1	79.0644	117.103	94.7455	17.1311	1.00292	749.662	61484.7	19161.3	14.0154	76.1085	0	607.892	190.133	1.66482e+06
19	2004	2013	1	0	0	0.0143473	6.7406	5.00628	4.41222e+06	5.91086e+06	0.571554	212.444	0.612029	291815	0.0140827	0.157063		0	5570.16	196584	3.47598e+06	36517.1	77.4775	106.895	94.7323	49.4747	1.00307	934.412	66286.4	21646.3	14.3373	81.3785	0	687.483	299.141	1.6023e+06
19	2005	2013	1	0	0	0.014897	6.75854	5.52733	3.94779e+06	8.93928e+06	0.563912	213.602	0.652732	492537	0.014057	0.154207		0	5538.58	192658	3.49144e+06	41522.1	75.8905	96.6867	94.7191	81.8183	1.00322	1119.16	71088	24131.2	14.6592	86.6484	0	767.074	408.148	1.53979e+06
19	2006	2013	1	0	0	0.0176056	6.79869	6.04272	118	10101178	0.542016	212.41	0.629867	784000	0.0140312	0.151351		39078.1	5189	179469	1744357	60412	56.01	60.82	97.2	147.9	0.971686	1327.54	54067	26616.2	14.9811	91.9184	0	846.666	517.156	1.47727e+06
19	2007	2013	1	0	0	0.0159534	6.85044	6.1147	12771982	12771982	0.514799	214.6	0.627819	893982	0.0140054	0.148494		52313.9	4220	163795	1529204	49977	69.11	81.56	97.2	168.694	0.986254	1699.78	61557	26870.1	15.89	92.6544	0	657.502	574.611	1.40005e+06
19	2008	2013	1	0	0	0.0216456	6.77057	6.98317	117.8	17600038	0.570414	217.76	0.622612	1.0947e+06	0.0139797	0.145638		70320.3	4693	158780	3255208	64867	76.79	81.55	97.25	174.598	1.05674	1811.87	81500	30005.4	15.94	94.88	0	947.976	664.78	1.53413e+06
19	2009	2013	1	0	0	0.0132507	6.84892	7.9038	116.9	21687980	0.541844	219.59	0.995856	1.29543e+06	0.0139539	0.142782		97674.9	4417	158292	3134538	27288	80.49	82.01	92	199.979	1.00471	1665.52	94900	34924.1	16.1	106.222	0	1117.41	892.196	833787
19	2010	2013	1	0	0	0.0127184	6.84239	8.70974	115	24608100	0.541062	219.8	0.999545	1391830	0.0142597	0.137401		117220	4833	174718	3925911	32563	81.06	83.88	92.4	224.176	1.04739	1929.28	110000	38109.8	15.33	114.171	0	1225.77	978.398	1.21708e+06
19	2011	2013	1	0	0	0.0143463	6.81826	8.77692	114.3	30054000	0.554063	221.8	0.995491	1618571	0.0145484	0.14537		140652	9327	210014	6820698	97299	87.83	0	88.81	229.332	0.964643	2300.62	124000	41096.7	16.35	130.175	2.19462e+06	1454.47	1100.63	1.56211e+06
19	2012	2013	1	0	0	0.0153999	6.82246	8.93584	111.5	34095400	0.494225	223.5	0.995973	1857557	0.0131225	0.138701		164971	7394	209781	7001813	78946	47.71	0	92.45	230	0.980932	2316.6	136500	43964.7	15.67	129.451	2.47807e+06	1605.05	1221.05	1.12837e+06
19	2013	2013	1	1	1	0.0253164	6.88432	9.74089	109	35030200	0.484428	225	0.996444	2151179	0.0126426	0.121479		194731	7426	197650	6545382	98460	48.1	0	94.04	400	0.99994	2325.61	141000	44053	17.74	134.74	2.94756e+06	1500.6	1323.01	1.08169e+06
19	2014	2013	1	1	1	0.023998	6.93636	10.215	107.8	36363100	0.492862	223.7	1.00313	2343186	0.0145743	0.120352		223980	3858	189430	5469039	111866	66.13	0	95.46	420	1.04236	2383.03	111900	45756	17.9426	136.39	2.87702e+06	1457.94	1418.01	901909
19	2015	2013	1	1	1	0.0211107	6.95823	10.4443	107.7	37219300	0.491842	223.86	0.999687	2523021	0.0137232	0.127291		258291	4138	176130	0	104177	72.11	0	96.56	370	1.01405	3383.75	82417	47730.7	18.5153	138.691	3.15478e+06	1444.49	1460.32	775941
19	2016	2013	1	1	1	0.0187978	6.99758	11.3231	107.2	38676300	0.471128	224	1	2712122	0.0140854	0.128913		295582	3345	42093	0	61217	44.72	0	97.67	470	0.976542	3360.67	101035	50323.7	18.0368	131.659	3.25878e+06	1432.98	1533.96	899042
19	2017	2013	1	1	1	0.0214926	6.97387	11.78	0	4.52803e+07	0.472212	227.493	1.14116	2.9012e+06	0.0137478	0.119934		303670	5159.6	145551	3.67695e+06	101582	56.8476	0	94.5609	469.942	1.005	3336.16	128708	53950.7	18.5218	149.888	4.18854e+06	1722.17	1716.24	789555
19	2018	2013	1	1	1	0.0220423	6.99181	12.301	0	4.83087e+07	0.46457	228.65	1.18187	3.10193e+06	0.0137221	0.117078		329209	5128.02	141626	3.69241e+06	106587	55.2607	0	94.5477	502.285	1.00515	3520.91	133509	56435.6	18.8437	155.158	4.64263e+06	1801.76	1825.24	727036
19	2019	2013	1	1	1	0.0225919	7.00976	12.8221	0	5.13371e+07	0.456928	229.808	1.22257	3.30265e+06	0.0136963	0.114221		354748	5096.44	137700	3.70787e+06	111592	53.6738	0	94.5345	534.629	1.0053	3705.66	138311	58920.6	19.1656	160.428	5.09671e+06	1881.35	1934.25	664517
20	2000	2013	1	0	0	0.0999967	6.31995	2.56691	2.85593e+06	0	0.573685	368.517	0	0	0.00491841	0.235321		0	13227.9	122933	255796	8029.73	23.261	150.856	100.168	0	1.06467	260.637	0	2906.4	11.6134	8.98509	0	0	0	317769
20	2001	2013	1	0	0	0.110048	6.31834	3.13703	2.64439e+06	0	0.570998	369.657	0	0	0.00524949	0.234676		0	12660.5	116191	323640	8639.09	25.0982	140.422	100.024	0	1.05858	268.642	0	5409.72	12.1204	13.9862	0	0	1.85889	326505
20	2002	2013	1	0	0	0.120099	6.31673	3.70716	2.43284e+06	0	0.568311	370.797	0.058185	0	0.00558058	0.234031		0	12093.2	109450	391485	9248.45	26.9354	129.988	99.8797	0	1.0525	276.647	0	7913.03	12.6273	18.9873	0	0	28.6798	335241
20	2003	2013	1	0	0	0.13015	6.31512	4.27728	2.2213e+06	0	0.565624	371.937	0.14003	0	0.00591167	0.233386		0	11525.9	102708	459329	9857.82	28.7725	119.554	99.7358	0	1.04641	284.653	0	10416.4	13.1343	23.9883	0	58.1754	55.5007	343977
20	2004	2013	1	0	0	0.140201	6.3135	4.8474	2.00976e+06	1.16361e+06	0.562937	373.077	0.221875	23387.8	0.00624275	0.232741		0	10958.6	95966.1	527173	10467.2	30.6097	109.12	99.5919	18.9079	1.04033	292.658	0	12919.7	13.6412	28.9894	0	131.111	82.3215	352712
20	2005	2013	1	0	0	0.150252	6.31189	5.41752	1.79822e+06	2.68752e+06	0.56025	374.217	0.30372	94332.2	0.00657384	0.232096		0	10391.3	89224.3	595017	11076.5	32.4469	98.6858	99.448	64.9198	1.03425	300.663	0	15423	14.1482	33.9905	0	204.046	109.142	361448
20	2006	2013	1	0	0	0.136271	6.35178	6.05256	112.7	4769300	0.55851	371.78	0.248426	150700	0.00690492	0.231451		22908.9	7192	83710	554161	15115	35.08	70.07	100	81.2	1.04872	307.537	2235	17926.3	14.6551	38.9916	0	276.981	135.963	370184
20	2007	2013	1	0	0	0.14149	6.34126	6.33913	5817500	5817500	0.548636	376.97	0.25063	236221	0.00723601	0.230806		31620.8	7786	81653	420431	14855	41.54	75	100	129.2	1.03052	342.434	2511	19520.4	15.98	47.45	0	344.454	176.445	530949
20	2008	2013	1	0	0	0.16807	6.29972	7.28926	116.4	7140700	0.545358	377.95	0.252017	307165	0.0075671	0.230161		45103	9704	69000	40446	13693	36.82	80.1	100	306	1.02139	341.512	3379	21673.7	15.64	49.4018	0	406.663	193.723	303505
20	2009	2013	1	0	0	0.205994	6.31033	8.02984	113.6	8065640	0.540656	378.78	0.998918	378110	0.00789818	0.229516		63913.6	11653	62564	556816	8645	29.49	85.36	100	315.18	0.997021	279.313	3600	25235.1	16.41	51.3958	0	467.024	218.978	297018
20	2010	2013	1	0	0	0.22205	6.27494	8.21108	114.6	9760900	0.546135	381.09	0.996982	387779	0.00956151	0.197566		83522.2	11521	57851	747323	8714	26.86	86.37	100	265.3	0.960159	316.497	2106	29321.9	16.65	55.2104	0	565.64	237.039	373439
20	2011	2013	1	0	0	0.220783	6.25287	8.45056	113.9	11757520	0.549537	383.2	0.997129	514389	0.00783149	0.229181		100803	4965	43711	1927946	14940	52.68	0	93.59	306.063	0.968767	375.176	5497	31297.1	16.26	61.0322	1.43008e+06	654.446	260.217	464084
20	2012	2013	1	0	0	0.286495	6.25628	9.2244	112.9	13743280	0.561761	383.9	0.999219	648466	0.00824335	0.264965		131169	5639	30534	1842506	12342	60.3	0	93.59	344.475	1.02522	348.847	6015	33970.5	16.59	60.0181	1.73262e+06	762.672	285.344	400481
20	2013	2013	1	1	1	0.260713	6.25793	10.06	111	15459100	0.556425	385.6	0.997925	720196	0.0089366	0.244756		166978	4779	28785	2744655	15900	50.32	0	98.83	405.409	0.961678	371.772	7006	37440.5	17.97	85.6442	1.82853e+06	844.231	307.704	455988
20	2014	2013	1	1	1	0.231669	6.2994	10.8447	109.7	16429000	0.544196	383.8	1.00234	780571	0.0102597	0.221286		197917	4612	28183	2188623	17490	54.51	0	100	423.086	1.04065	399.256	80028	36875.8	19.02	91.3821	1.91645e+06	855.417	349.731	426502
20	2015	2013	1	1	1	0.224759	6.32869	11.0037	107.9	17876280	0.523139	384.54	0.99909	844747	0.00757363	0.215714		258988	5445	31706	0	29334	37.37	0	99.18	501.726	0.960819	368.975	560	39639.8	19.8092	81.5739	2.11839e+06	915.628	385.897	430047
20	2016	2013	1	1	1	0.217841	6.35128	11.7156	107.6	19321400	0.511059	384	1	751641	0.0121514	0.215084		319984	3565	18814	0	11032	53.2	0	99.24	673.262	0.960196	384.318	572	41970.6	20.1048	81.8673	2.22599e+06	965.076	419.704	500300
20	2017	2013	1	1	1	0.270864	6.29256	12.259	0	2.09744e+07	0.528007	387.894	1.28586	945665	0.0105469	0.224356		298831	3583.45	8323.15	1.40915e+06	18388.9	54.4931	0	97.7211	617.062	0.961234	396.726	22567.1	45462.8	20.2317	94.0036	2.79964e+06	1079.27	430.993	466279
20	2018	2013	1	1	1	0.280915	6.29095	12.8291	0	2.24983e+07	0.52532	389.034	1.3677	1.01661e+06	0.010878	0.223711		327077	3016.14	1581.38	1.47699e+06	18998.3	56.3303	0	97.5772	663.074	0.95515	404.731	24608.5	47966.1	20.7386	99.0046	3.10408e+06	1152.2	457.814	475015
20	2019	2013	1	1	1	0.290966	6.28933	13.3992	0	2.40222e+07	0.522633	390.174	1.44955	1.08755e+06	0.011209	0.223066		355323	2448.82	0	1.54484e+06	19607.6	58.1675	0	97.4333	709.086	0.949066	412.736	26649.8	50469.4	21.2456	104.006	3.40853e+06	1225.14	484.635	483750
21	2000	2012	1	0	0	0.390724	6.07993	3.05672	6.75094e+06	0	0.477247	1061.47	0	0	0.00885256	0.179131		0	18636.6	82504.3	1.01678e+06	8632.34	44.1017	146.056	104.722	0	1.08824	484.387	3831.89	0	28.1964	40.0683	0	207.098	39.9787	3.72601e+06
21	2001	2012	1	0	0	0.398794	6.09788	3.53879	6.25088e+06	232222	0.480769	1070.68	0.0195198	0	0.00858986	0.180717		0	18199.5	80652.5	1.02169e+06	10323.8	46.4909	136.015	102.922	0	1.08149	504.253	7720.45	1548.22	29.5096	47.4945	0	282.63	99.0368	3.65083e+06
21	2002	2012	1	0	0	0.406864	6.11582	4.02086	5.75082e+06	2.52937e+06	0.484291	1079.88	0.0959477	0	0.00832716	0.182302		0	17762.5	78800.6	1.0266e+06	12015.3	48.8801	125.975	101.121	0	1.07473	524.119	11609	4230.94	30.8229	54.9207	0	358.163	158.095	3.57565e+06
21	2003	2012	1	0	0	0.414934	6.13376	4.50293	5.25076e+06	4.82652e+06	0.487814	1089.09	0.172376	0	0.00806446	0.183888		0	17325.5	76948.8	1.03152e+06	13706.8	51.2693	115.934	99.3207	0	1.06798	543.985	15497.6	6913.66	32.1362	62.3469	0	433.696	217.153	3.50047e+06
21	2004	2012	1	0	0	0.423004	6.15171	4.98499	4.7507e+06	7.12368e+06	0.491336	1098.29	0.248803	0	0.00780175	0.185473		4140.7	16888.5	75096.9	1.03643e+06	15398.3	53.6585	105.893	97.5202	0	1.06123	563.851	19386.1	9596.38	33.4495	69.7731	0	509.229	276.211	3.42528e+06
21	2005	2012	1	0	0	0.431074	6.16965	5.46706	4.25063e+06	9.42083e+06	0.494858	1107.5	0.325231	113644	0.00753905	0.187059		26283.5	16451.5	73245.1	1.04134e+06	17089.7	56.0476	95.8525	95.7196	0	1.05447	583.718	23274.7	12279.1	34.7627	77.1993	0	584.762	335.269	3.3501e+06
21	2006	2012	1	0	0	0.467698	6.17452	5.51899	113.2	11999550	0.489518	1106.08	0.267684	430600	0.00727635	0.188644		57844.9	16071	70186	255300	23983	84.57	66.4	89.7	349.562	1.0453	596.306	17754	14961.8	36.076	84.6255	0	660.295	394.327	3.27492e+06
21	2007	2012	1	0	0	0.439819	6.24341	6.36732	13751799	13751799	0.496808	1123.43	0.26849	519760	0.00701365	0.19023		65070.8	13316	67089	783875	20839	56.62	65.39	100	347.548	1.04909	638.74	17427	17892	37.92	100.004	0	683.189	476.5	2.38895e+06
21	2008	2012	1	0	0	0.418823	6.271	7.02254	110.1	15808884	0.483013	1141.73	0.263985	722817	0.00675095	0.191815		80466.8	12451	60278	920089	15007	76.52	81	100	590.785	1.03527	749.55	53420	20552.4	38.41	100.054	0	721.028	538.457	3.00626e+06
21	2009	2012	1	0	0	0.416178	6.24733	7.75692	110	17300023	0.503653	1155.28	0.949562	925875	0.00648825	0.193401		113043	13448	58420	900046	12125	69.88	89.02	100	702.46	1.03221	657.289	42478	23742.9	38.95	101.141	0	828.654	564.117	2.59836e+06
21	2010	2012	1	0	0	0.464257	6.25263	8.25783	112.2	20503000	0.515959	1161.01	0.997537	910313	0.00807276	0.205279		147209	17866	53984	1384577	14652	70.78	89.88	100	956.036	1.01899	546.937	47450	25859.5	40.94	104.062	0	973.916	633.989	3.65181e+06
21	2011	2012	1	0	0	0.52697	6.24203	8.27588	111.3	24499000	0.546345	1160.7	1.00017	1285890	0.00467577	0.197959		155811	16395	76427	2077000	37707	0	0	100	1227.65	0.984297	706.516	44573	28191.4	41.82	115.997	2.90557e+06	1168.94	671.024	4.14623e+06
21	2012	2012	1	1	1	0.507588	6.24147	8.76794	109.6	27209000	0.549785	1172.1	0.995137	1599292	0.00496595	0.205867		188844	15774	75312	2075174	36703	48.16	0	0	0	1.04484	707.264	55051	29720.8	45.13	138.672	3.26523e+06	1273.46	720.806	3.27254e+06
21	2013	2012	1	1	1	0.535841	6.24199	9.31001	108.2	29043115	0.543622	1163.9	1.00352	1803034	0.00533572	0.169799		200011	14271	79253	1326353	39071	89.64	0	68.91	1489	0.983331	720.744	61991	32921.2	46.02	141.338	3.82013e+06	1309.91	760.018	2.66173e+06
21	2014	2012	1	1	1	0.546963	6.29422	9.77815	106.5	30352036	0.515007	1196.6	0.957129	1924707	0.00496291	0.19021		225129	14200	64676	2056423	53790	86.2	0	82.37	1740	0.968019	785.264	60585	35015.4	49.6903	148.341	3.7222e+06	1271.49	851.283	2.64327e+06
21	2015	2012	1	1	1	0.433113	6.43735	10.2844	106.8	30003400	0.548495	1202.19	0.958334	2128605	0.00392977	0.215449		249914	10913	49850	0	31698	93	0	99.99	1737	1.00703	789.868	41592	40492.5	46.1987	145.274	4.54686e+06	1203.91	919.422	2.2234e+06
21	2016	2012	1	1	1	0.517188	6.40458	10.6142	106.8	34771269	0.48371	1207	0.960232	2400998	0.00611922	0.213636		267201	7419	27999	0	14050	98.84	0	93.11	2252	0.985108	833.586	70346	42779.9	47.9108	159.814	4.81362e+06	1322.75	1055.85	2.02167e+06
21	2017	2012	1	1	1	0.527915	6.38499	11.2519	0	3.69866e+07	0.537126	1217.96	1.24237	2.55034e+06	0.00438664	0.206085		291997	11207.4	51022.9	1.10027e+06	37387.5	84.7178	0	74.1131	2079.35	0.973433	822.112	69937.5	44471.8	50.522	166.314	5.82675e+06	1491.16	1043.97	2.44792e+06
21	2018	2012	1	1	1	0.535985	6.40293	11.7339	0	3.92838e+07	0.540648	1227.17	1.31879	2.75339e+06	0.00412394	0.20767		314140	10770.4	49171.1	1.10518e+06	39079	87.107	0	72.3125	2253.3	0.966679	841.978	73826	47154.5	51.8352	173.74	6.46664e+06	1566.69	1103.02	2.37274e+06
21	2019	2012	1	1	1	0.544055	6.42088	12.216	0	4.15809e+07	0.54417	1236.37	1.39522	2.95645e+06	0.00386124	0.209256		336283	10333.4	47319.2	1.11009e+06	40770.5	89.4962	0	70.512	2427.25	0.959926	861.845	77714.6	49837.2	53.1485	181.166	7.10652e+06	1642.22	1162.08	2.29756e+06
22	2000	2015	1	0	0	0.318049	5.76625	4.69644	797188	0	0.215286	235.186	0	0	0.00877317	0.245424		0	0	1216.28	0	0	44.6389	58.7055	96.3445	0	0.995362	12.3197	0	0	4.21157	4.79935	0	0	0	61937.6
22	2001	2015	1	0	0	0.330463	5.78192	5.29837	738145	0	0.224598	236.843	0	0	0.00851298	0.241196		0	71.3636	2171.91	0	0	47.1155	54.6255	96.5273	0	0.996347	16.1794	0	0	4.60919	6.54609	0	0	0	66563.1
22	2002	2015	1	0	0	0.342877	5.79759	5.90029	679102	0	0.23391	238.499	0	0	0.0082528	0.236968		0	622.655	3127.54	0	0	49.592	50.5454	96.71	0	0.997332	20.0391	0	0	5.00681	8.29284	0	0	0	71188.6
22	2003	2015	1	0	0	0.355291	5.81326	6.50221	620059	0	0.243222	240.155	0	0	0.00799262	0.232739		0	1173.95	4083.16	0	0	52.0685	46.4653	96.8927	0	0.998318	23.8988	0	2326.32	5.40443	10.0396	0	0	0	75814.1
22	2004	2015	1	0	0	0.367706	5.82893	7.10414	561017	0	0.252534	241.812	0.0747832	0	0.00773244	0.228511		0	1725.24	5038.79	10755.3	0	54.5451	42.3852	97.0755	0	0.999303	27.7585	0	5234.73	5.80204	11.7863	0	0	10.8034	80439.7
22	2005	2015	1	0	0	0.38012	5.8446	7.70606	501974	479841	0.261846	243.468	0.171804	0	0.00747226	0.224282		0	2276.53	5994.42	46172.6	0	57.0216	38.3051	97.2582	0	1.00029	31.6183	0	8143.13	6.19966	13.5331	0	7.71193	25.322	85065.2
22	2006	2015	1	0	0	0.410885	5.88932	8.69741	111.9	1354865	0.265709	244.3	0.107532	83500	0.00721208	0.220054		7938.7	2946	7322	22289	1831	62.6	25	100	39.498	1.03226	33.9633	393	11051.5	6.59728	15.2798	0	22.3655	39.8406	89690.7
22	2007	2015	1	0	0	0.404156	5.91382	8.87679	1623779	1623779	0.280826	246.42	0.108879	101722	0.0069519	0.215825		10344.2	3193	7965	38930	1948	63.47	33.55	98	42.183	0.967993	44.244	647	15291.5	8.02	18.0458	0	45.547	64.3991	102836
22	2008	2015	1	0	0	0.391129	5.92237	9.52373	110.6	1940496	0.285339	248.22	0.109137	153394	0.00669172	0.211597		12802.6	3361	7772	145191	1772	65.17	33.15	95	44.044	0.981827	48.9564	935	18286.1	7.17	17.6112	0	52.2963	72.6724	80134.3
22	2009	2015	1	0	0	0.444932	5.88384	9.95565	112.1	2216546	0.285534	250.23	0.995964	205065	0.00643153	0.207368		16816.6	3709	8186	140508	1610	62.47	29.79	95	56.33	0.971834	45.2494	1851	20357.4	7.23	18.79	0	60.178	81.8463	67576.8
22	2010	2015	1	0	0	0.404023	5.92945	10.5978	112.3	2608992	0.308711	252.7	0.995251	213778	0.00542262	0.21031		2165.27	3645	7169	13297	1442	67.74	30.58	100	60.703	1.04124	43.7869	3365	20891.9	7.55	19.3477	0	74.1419	93.3079	121033
22	2011	2015	1	0	0	0.454612	5.86294	10.9774	113.7	3196451	0.334934	254.2	0.989772	281967	0.00662957	0.182742		17577	7924	14869	373541	7514	68.09	0	98	114.816	1.03966	49.7387	5232	23498	8.24	25.7838	929580	89.6442	102.961	204209
22	2012	2015	1	0	0	0.462946	5.90449	11.6681	113	3899564	0.343449	255.6	0.997261	355493	0.00578013	0.203345		22262.7	7930	16996	453600	7920	67.8	0	100	130	0.999769	58.8124	7300	26462.2	9.09	29.0991	1.20515e+06	113.994	121.828	78455
22	2013	2015	1	0	0	0.525651	5.91807	12.613	112.1	4497419	0.34522	256.9	0.997275	428355	0.00578349	0.199067		28833	6542	15136	534903	7948	90.94	0	98.6	150	1.01133	61.9888	10600	32318.6	9.85	29.5112	2.16765e+06	128.811	137.692	103283
22	2014	2015	1	0	0	0.514446	5.95224	13.3186	108.1	5009758	0.349937	258.8	0.996522	471784	0.00469259	0.180359		38386.8	7941	15333	1123184	14571	76.61	0	98.8	170	1.02591	69.1114	11800	33603.1	9.8347	30.2743	1.33595e+06	142.587	152.326	133912
22	2015	2015	1	1	1	0.493045	6.04918	13.8895	108.7	5519581	0.347943	259.1	0.99946	522364	0.00495234	0.171077		50183	6727	14131	0	13776	81.02	0	99	220	1.01007	71.0612	11509	37939.9	10.2552	30.4908	1.54127e+06	154.087	174.809	120913
22	2016	2015	1	1	1	0.494822	6.09917	14.3756	108.7	6133904	0.347299	261	0.996169	575064	0.00447493	0.186283		66732.8	7509	14131	0	12860	84.78	0	99.5	280	0.986319	75.6293	1208	41829.1	10.6019	29.9157	1.67243e+06	168.313	195.087	138957
22	2017	2015	1	1	1	0.529089	6.03265	14.9291	0	6.4295e+06	0.37359	263.345	1.33605	618436	0.00435009	0.173541		56233.4	8892.02	17461.9	471181	15381.5	86.7402	0	99.4509	257.868	1.01211	77.9348	10524.6	43044	10.9711	34.4941	2.19518e+06	183.555	199.545	140571
22	2018	2015	1	1	1	0.541503	6.04832	15.5311	0	6.9253e+06	0.382902	265.001	1.43308	670108	0.0040899	0.169312		61453.5	9443.31	18417.6	506598	16836.1	89.2167	0	99.6336	281.034	1.0131	81.7945	11447.8	45952.4	11.3687	36.2408	2.43335e+06	198.208	214.064	145197
22	2019	2015	1	1	1	0.553917	6.06399	16.133	0	7.42111e+06	0.392214	266.657	1.5301	721779	0.00382972	0.165084		66673.6	9994.6	19373.2	542015	18290.8	91.6933	0	99.8164	304.2	1.01408	85.6542	12371	48860.8	11.7663	37.9876	2.67153e+06	212.862	228.583	149822
23	2000	2013	1	0	0	0.332142	5.91707	5.34297	1.21056e+06	0	0.129239	142.215	0	0	0	0.159263		0	2191.21	58495.5	560483	11524.3	14.4512	66.3717	109.773	0	0.946364	0	0	0	4.62426	0	0	0	0	0
23	2001	2013	1	0	0	0.324773	5.92954	5.76235	1.1209e+06	0	0.155893	144.276	0.0428362	0	0	0.160936		0	2154.27	55239.8	541252	11084	19.9364	61.9045	110.613	0	0.952694	0	0	959.571	4.87193	1.38482	0	0	0	0
23	2002	2013	1	0	0	0.317404	5.942	6.18173	1.03123e+06	0	0.182547	146.338	0.119131	4832.86	0	0.16261		0	2117.34	51984.1	522021	10643.7	25.4215	57.4374	111.452	0	0.959024	0	0	3726.42	5.11961	4.15427	0	0	0	0
23	2003	2013	1	0	0	0.310034	5.95447	6.60111	941571	0	0.209201	148.399	0.195427	42229.9	0	0.164283		0	2080.4	48728.5	502791	10203.4	30.9067	52.9702	112.292	0	0.965354	0	0	6493.27	5.36728	6.92371	0	0	12.2492	0
23	2004	2013	1	0	0	0.302665	5.96693	7.0205	851908	0	0.235855	150.46	0.271722	79627	0	0.165956		0	2043.46	45472.8	483560	9763.15	36.3919	48.503	113.131	0	0.971684	0	1294.56	9260.12	5.61496	9.69316	0	0	29.8025	0
23	2005	2013	1	0	0	0.295296	5.9794	7.43988	762245	459786	0.262508	152.521	0.348017	117024	0.00103523	0.16763		0	2006.53	42217.1	464329	9322.87	41.8771	44.0358	113.971	0	0.978014	11.246	2589.96	12027	5.86263	12.4626	0	0	47.3557	0
23	2006	2013	1	0	0	0.325575	5.95164	7.67083	113.5	1996407	0.297134	152.06	0.306984	140400	0.00258677	0.169303		6724	2289	27328	335271	11234	42.36	14.74	85.79	41.475	0.972474	56.8068	5723	14793.8	6.11031	15.2321	0	30.5435	64.9089	127936
23	2007	2013	1	0	0	0.267606	6.05436	8.57668	2465826	2465826	0.29114	156.32	0.297659	191818	0.0041383	0.170976		8740	1932	41946	365083	11142	57.07	27.23	100	58.21	0.960238	80.5086	7160	18324.8	6.43	24.6139	0	98.4604	90.7917	379424
23	2008	2013	1	0	0	0.261509	6.0142	8.58445	112.8	3138785	0.307762	157.71	0.295986	229215	0.00568983	0.172649		20030.4	2026	38646	249196	7358	76.38	58.29	100	57.678	0.975774	89.5023	8894	20451.5	6.62	25.2439	0	127.359	101.307	466136
23	2009	2013	1	0	0	0.285728	6.059	8.61202	113.9	3177113	0.372665	160.18	0.992321	266612	0.00724137	0.174323		32184.8	1211	30151	291703	4094	52.9	44.6	87	111.6	1.0493	97.4808	5018	23546.6	6.63	17.2799	0	112.602	116.016	517353
23	2010	2013	1	0	0	0.234014	6.06804	9.6034	114.2	3975762	0.422259	166.84	0.980041	275093	0.00333455	0.188466		48526.5	1369	34185	441633	5188	73.84	44.7	87	154.508	1.02571	102.544	9934	25833.3	6.95	20.7341	0	154.56	130.843	853914
23	2011	2013	1	0	0	0.273733	6.01797	9.96428	112.3	4965849	0.417633	167.9	0.997022	370626	0.00484742	0.169036		60314	1749	21543	648071	6170	44.38	0	362	225.4	1.0323	122.39	9006	27087.1	7.55	26.8343	739273	181.121	151.758	965856
23	2012	2013	1	0	0	0.146487	6.03185	10.808	111.3	6307923	0.481534	168.1	0.999405	411311	0.016781	0.175853		72536	2291	12637	593044	6730	82	0	92.29	179.815	1.05875	179.007	5224	30925.2	7.67	28.9901	840466	263.922	164.045	1.11643e+06
23	2013	2013	1	1	1	0.271352	6.04678	11.2509	110.2	7349971	0.508375	169.4	1	421111	0.0244805	0.171322		67491	1830	11912	542295	5180	99.87	0	95	268.335	1.04919	206.811	8515	34090.9	7.95	34.5921	826662	310.035	181.301	1.38653e+06
23	2014	2013	1	1	1	0.234675	6.09364	11.3315	108.5	8560135	0.530961	169.3	1	472452	0.025405	0.185587		78616.2	1920	11689	372102	3313	99.99	0	100	275.7	0.972014	260.586	14901	36277.4	8.13	37.5859	853834	369.738	203.46	1.74893e+06
23	2015	2013	1	1	1	0.221575	6.12359	11.5092	108.1	8920837	0.504549	171.96	1	476136	0.00333469	0.189961		92036.6	1817	12184	0	4692	98.88	0	100	370	1.0229	254.08	18611	39927.7	8.3502	44.4809	1.04428e+06	361.105	226.639	1.89388e+06
23	2016	2013	1	1	1	0.239633	6.13494	11.6065	107.3	10066500	0.512732	174	0.994253	500696	0.0159493	0.186888		101110	1200	7292	0	8392	95	0	100	370	1.0573	297.418	21000	43650.5	8.445	44.285	1.18015e+06	405.903	248.356	1.61026e+06
23	2017	2013	1	1	1	0.206865	6.12897	12.4724	0	1.06175e+07	0.582354	177.255	1.26356	565789	0.0196536	0.187709		112146	1563.29	3148.91	233561	4039.49	107.699	0	124.044	403.845	1.05398	306.415	18134.8	45229.2	8.83473	45.696	1.37452e+06	446.418	257.994	2.05981e+06
23	2018	2013	1	1	1	0.199496	6.14144	12.8918	0	1.1464e+07	0.609008	179.316	1.33985	603186	0.0212052	0.189382		121923	1526.35	0	214331	3599.21	113.184	0	124.883	439.142	1.06031	331.012	19430.2	47996	9.08241	48.4654	1.52471e+06	484.224	275.548	2.23543e+06
23	2019	2013	1	1	1	0.192127	6.1539	13.3112	0	1.23105e+07	0.635662	181.378	1.41615	640583	0.0227567	0.191056		131700	1489.42	0	195100	3158.93	118.67	0	125.723	474.438	1.06664	355.609	20725.6	50762.9	9.33008	51.2349	1.6749e+06	522.031	293.101	2.41106e+06
24	2000	2012	1	0	0	0.00530845	7.35182	3.96643	4.59164e+07	0	0.303144	1122.54	0.637999	11171500	0.0091916	0.200747		5217.55	9353.8	126876	3.4724e+06	24695.2	91.1368	156.033	91.5992	2436.32	1.01122	5129.03	0	6525.08	218.473	330.467	0	1386.85	0	1.60736e+08
24	2001	2012	1	0	0	0.00500114	7.36728	4.47466	4.25152e+07	0	0.295807	1137.42	0.664299	11171500	0.00963246	0.199367		58200.9	9317.99	120272	3.22705e+06	24369.5	89.0773	145.115	92.1727	2641.16	1.0111	5644.47	0	12076.3	245.446	405.26	0	1548.54	354.331	1.62647e+08
24	2002	2012	1	0	0	0.00469383	7.38273	4.9829	3.9114e+07	2.22813e+06	0.288471	1152.29	0.690598	11171500	0.0100733	0.197988		111184	9282.17	113668	2.9817e+06	24043.9	87.0177	134.198	92.7463	2846	1.01097	6159.9	57717.4	17627.6	272.419	480.053	0	1710.22	1385.17	1.64558e+08
24	2003	2012	1	0	0	0.00438652	7.39819	5.49113	3.57127e+07	1.99217e+07	0.281134	1167.16	0.716897	11171500	0.0105142	0.196608		164168	9246.35	107064	2.73635e+06	23718.2	84.9582	123.281	93.3198	3050.83	1.01084	6675.33	139052	23178.8	299.392	554.846	0	1871.9	2416	1.66469e+08
24	2004	2012	1	0	0	0.00407921	7.41364	5.99937	3.23115e+07	3.76153e+07	0.273798	1182.04	0.743196	11171500	0.0109551	0.195229		217151	9210.53	100460	2.49099e+06	23392.6	82.8986	112.364	93.8934	3255.67	1.01072	7190.77	220386	28730.1	326.365	629.64	0	2033.58	3446.84	1.6838e+08
24	2005	2012	1	0	0	0.0037719	7.42909	6.5076	2.89103e+07	5.53089e+07	0.266461	1196.91	0.769496	11171500	0.0113959	0.193849		270134	9174.71	93856.1	2.24564e+06	23066.9	80.8391	101.447	94.4669	3460.51	1.01059	7706.2	301720	34281.3	353.339	704.433	0	2195.27	4477.67	1.70291e+08
24	2006	2012	1	0	0	0.00373662	7.43109	7.02221	112	78702835	0.263281	1197.6	0.755995	11171500	0.0118368	0.192469		337150	10170	93755.4	2.33101e+06	14648	74.6	92.48	92.5	2811.68	1.00994	7211.4	455191	39832.6	380.312	779.226	0	2356.95	5508.5	1.72202e+08
24	2007	2012	1	0	0	0.00263086	7.45591	7.52191	93533200	93533200	0.258026	1213.26	0.765623	11171500	0.0122776	0.19109		396660	9134.25	82909.1	2.43304e+06	20533.5	74.8	69.56	95.7	3471.53	1.01072	8810.04	506572	46507.6	397.63	867.451	0	2509.5	6742.81	146757200
24	2008	2012	1	0	0	0.00360469	7.4754	8.04177	109.1	104900000	0.240867	1299.85	0.7314	11171500	0.0127185	0.18971		384850	8367	57783	19990	19983	66.4	74.52	97.7	3826.88	1.00909	10043.2	608172	53189.7	427.42	930.36	0	2543.28	7254.48	1.78179e+08
24	2009	2012	1	0	0	0.00155201	7.51584	8.53159	110.2	121500000	0.225218	1245.83	0.991829	11171500	0.0131594	0.188331		485840	8712.53	59921.9	1.81677e+06	19076.9	68.9	77.85	98.2	4516.85	1.01127	10356.1	612094	55287.8	470.92	1012.67	0	2715.85	8728.86	1.39486e+08
24	2010	2012	1	0	0	0.00132639	7.51134	9.03657	110.3	141100000	0.229135	1257.8	0.995238	11171500	0.0130497	0.175949		521830	8198	56844	1908000	27000	65.8	80.98	97	5455.64	1.01065	10599.4	636358	60464.7	492.16	1076.99	0	3119.49	9758.64	1.88025e+08
24	2011	2012	1	0	0	0.00282652	7.5278	9.55678	108.1	162500000	0.21928	1277.9	0.992175	11171500	0.0141463	0.184687		591060	8633	61299	0	29405	66.26	0	98.24	5233.65	1.00888	10513.9	705447	66234.1	517.49	955.806	2.83439e+07	3277.5	10797.7	2.19756e+08
24	2012	2012	1	1	1	0.00245488	7.53401	10.0579	107.7	178800000	0.21566	1297.5	0.992447	11171500	0.0146282	0.201541		646280	9190	59330	0	30844	78.96	0	99.12	5719.6	1.01075	11200.5	804160	72618.3	548.3	1195.18	3.13719e+07	3454.98	11637.3	2.19303e+08
24	2013	2012	1	1	1	0.00160918	7.54042	10.5796	107.7	195000000	0.213759	1316.3	0.992859	11171500	0.0154208	0.186375		703220	9486	52041	0	27182	86.58	0	99.3	5346.98	1.00836	11623.5	852418	77988.8	576.25	1382.58	3.46287e+07	3611.27	12434	2.20924e+08
24	2014	2012	1	1	1	0.00110799	7.55946	11.0888	107.3	213300000	0.207829	1333.4	0.993625	11171500	0.0162252	0.178112		756230	9174	40347	0	22710	87.67	0	99.59	5530	1.00944	12190.6	904085	84108.8	592.683	1584.45	3.68049e+07	3697.52	13525.2	2.07634e+08
24	2015	2012	1	1	1	0.000146312	7.58887	11.6041	106.9	230145900	0.192043	1345.2	0.995614	11171500	0.0147798	0.177048		799090	8978	22070	0	12987	83.33	0	99.8	4917	1.01161	12774.4	1299635	90706.8	622.413	1729.08	4.60277e+07	3644.45	14705.2	1.59595e+08
24	2016	2012	1	1	1	0.000212855	7.59993	12.0859	106.8	256691300	0.181767	1363	0.993397	11171500	0.0162098	0.175976		846170	8515	10257	0	7874	0	0	99.84	4755	1.00737	13463.8	1302858	96538.1	641.378	1171.32	5.03864e+07	3888.2	16196.8	1.47472e+08
24	2017	2012	1	1	1	8.41563e-05	7.61455	12.6064	0	2.67632e+08	0.178424	1375.39	1.08509	11171500	0.0166863	0.177294		905935	8744.89	14608.9	0	19159.2	56.1245	0	101.349	5918.55	1.00906	13891.4	1.27773e+06	100896	677.017	1601.95	5.831e+07	4135.46	16847.7	1.93224e+08
24	2018	2012	1	1	1	0	7.63001	13.1147	0	2.85325e+08	0.171087	1390.26	1.11139	11171500	0.0171271	0.175915		958918	8709.07	8004.98	0	18833.5	54.065	0	101.923	6123.39	1.00894	14406.8	1.35907e+06	106448	703.99	1676.74	6.47743e+07	4297.14	17878.5	1.95135e+08
24	2019	2012	1	1	1	0	7.64546	13.6229	0	303018885	0.163751	1405.13	1.13769	11171500	0.017568	0.174535		1.0119e+06	8673.25	1401.05	0	18507.9	52.0055	0	102.497	6328.22	1.00881	14922.3	1.4404e+06	111999	730.963	1751.54	7.12386e+07	4458.82	18909.4	1.97046e+08
25	2000	2013	1	0	0	0	6.3548	1.24486	2.38059e+06	1.14007e+06	0.734891	160.58	0.510765	402020	0.0241847	0.124597		0	12425.8	126979	851492	0	47.969	146.924	66.3256	0	0.998569	1262.93	2242.63	12467.6	6.57889	33.6279	0	356.379	21.3278	1.99392e+06
25	2001	2013	1	0	0	0	6.3769	1.94174	2.20426e+06	1.8214e+06	0.721003	159.956	0.547248	440633	0.0232525	0.125319		0	11770.1	122105	915145	0	46.1927	136.625	68.6418	0	0.998816	1252.3	4385.27	14044.7	7.02156	34.5139	0	364.976	44.2507	1.98941e+06
25	2002	2013	1	0	0	0	6.39899	2.63862	2.02793e+06	2.50272e+06	0.707115	159.332	0.583731	479247	0.0223204	0.12604		3223.13	11114.4	117232	978799	0	44.4165	126.325	70.958	0	0.999063	1241.67	6527.92	15621.7	7.46422	35.3999	0	373.573	67.1736	1.98489e+06
25	2003	2013	1	0	0	0	6.42109	3.3355	1.8516e+06	3.18405e+06	0.693227	158.708	0.620214	517860	0.0213883	0.126761		8102.26	10458.6	112358	1.04245e+06	0	42.6402	116.026	73.2742	8.2124	0.99931	1231.03	8670.56	17198.8	7.90689	36.2858	0	382.169	90.0965	1.98038e+06
25	2004	2013	1	0	0	0	6.44319	4.03238	1.67526e+06	3.86538e+06	0.679339	158.084	0.656697	556474	0.0204562	0.127482		12981.4	9802.88	107484	1.10611e+06	0	40.8639	105.727	75.5904	40.4381	0.999557	1220.4	10813.2	18775.9	8.34955	37.1718	0	390.766	113.019	1.97586e+06
25	2005	2013	1	0	0	0	6.46529	4.72926	1.49893e+06	4.5467e+06	0.665451	157.46	0.69318	595087	0.019524	0.128203		17860.5	9147.15	102611	1.16976e+06	5708.87	39.0876	95.4282	77.9065	72.6639	0.999804	1209.77	12955.9	20352.9	8.79222	38.0578	0	399.363	135.942	1.97135e+06
25	2006	2013	1	0	0	0.0817957	6.52502	5.31956	113.8	4003426	0.602984	156.18	0.670316	267600	0.0185919	0.128925		15064.2	10012	136900	646665	44142	39.71	76.16	80	129.8	0.986378	1024.28	5035	21930	9.23489	38.9438	0	407.959	158.865	1.96684e+06
25	2007	2013	1	0	0	0.0677114	6.52301	6.0038	4849215	4849215	0.618451	155.97	0.670065	672314	0.0176598	0.129646		16530.1	8742	12355	244104	45932	37.65	82.73	80	129.91	0.980608	1178.82	8530	22310.8	9.62	45.84	0	299.924	156.096	1.35412e+06
25	2008	2013	1	0	0	0.0742988	6.51196	6.93565	113.4	6108589	0.634074	155.66	0.669857	710927	0.0167276	0.130367		22406.6	7752	103330	226526	34562	38.39	83.55	80	162.9	1.02883	1183.75	11305	23681.7	10.03	36.982	0	365.765	178.47	2.41767e+06
25	2009	2013	1	0	0	0.060178	6.58422	7.38239	113.1	6883947	0.594964	155.46	1.00064	749541	0.0157955	0.131088		34006.6	5654	95600	1525276	25132	36.72	43	100	192.185	1.04247	1266.65	20108	26993.2	9.6	36.7821	0	389.502	228.529	1.39528e+06
25	2010	2013	1	0	0	0.0678698	6.5625	8.25022	114.2	8603675	0.623001	154.6	1.00278	745960	0.00979855	0.13464		45003.3	2591	87528	323802	26543	37.85	84.53	84.97	230.346	0.961453	1233.59	30101	29292.6	10.09	42.191	0	493.431	258.675	2.16623e+06
25	2011	2013	1	0	0	0.068194	6.54953	9.10401	112.2	10445851	0.628987	154.3	1.0013	1024325	0.0154356	0.12837		58081.5	5103	74706	6505196	73170	15.57	0	84.97	257.237	1.01579	1170.21	35214	30963	11.31	45.6303	1.21966e+06	573.863	292.132	2.32615e+06
25	2012	2013	1	0	0	0.0812748	6.57273	9.62125	109.5	11123567	0.606457	153.2	1.00392	1235244	0.0135708	0.138128		72323.2	4461	75796	2521091	60809	15.09	0	100	299.616	1.02814	1201.21	46140	32998.8	12.42	43.3695	1.49456e+06	574.303	321.383	2.1982e+06
25	2013	2013	1	1	1	0.125556	6.59999	10.4433	108.7	11936598	0.597256	152.3	1.00328	1297005	0.015806	0.138699		84604.8	2953	70002	2482995	61697	16.24	0	99.95	330.863	0.964306	1211.17	51449	34248.4	14.53	46.4684	1.51336e+06	590.957	347.622	2.2933e+06
25	2014	2013	1	1	1	0.121744	6.68201	11.295	105.8	11712452	0.548152	152	1.00132	1298326	0.0162788	0.114419		88520.3	2656	65470	2592825	152206	14.4	0	99.95	360.479	0.997829	1159.94	60084	33697.2	15.6399	45.2483	1.50885e+06	522.092	378.898	2.24523e+06
25	2015	2013	1	1	1	3.43013	6.73206	11.605	103	11646927	0.514385	151.21	1.00271	537680	0.00927814	0.146102		58450	5363	52554	0	166611	16.1	0	100	390.218	0.977546	999.223	9887	35153.9	12.95	48.087	1.06114e+06	480.517	399.979	1.67624e+06
25	2016	2013	1	1	1	0.20597	6.73353	12.0558	97.5	7667098	0.434647	150	1.00667	555520	0.00430096	0.137453		23497.7	2053	32824	0	97303	45.01	0	100	442.647	1.03079	977.032	6076	36698.2	10.5056	47.5676	1.08252e+06	262.061	287.627	1.3477e+06
25	2017	2013	1	1	1	1.18172	6.73045	13.0918	0	1.27226e+07	0.498796	149.972	1.13098	1.05845e+06	0.00833846	0.136858		76410.1	1278.31	44128.2	1.9336e+06	137583	17.7724	0	105.701	459.373	1.00277	1082.2	38667.6	39277.6	14.1042	48.6895	1.77234e+06	502.524	411.017	1.91719e+06
25	2018	2013	1	1	1	1.31224	6.75255	13.7887	0	1.3404e+07	0.484908	149.348	1.16746	1.09706e+06	0.00740633	0.137579		81289.2	622.573	39254.6	1.99725e+06	148573	15.9961	0	108.017	491.598	1.00301	1071.57	40810.2	40854.6	14.5469	49.5755	1.95131e+06	511.12	433.94	1.91267e+06
25	2019	2013	1	1	1	1.44276	6.77465	14.4856	0	1.40853e+07	0.47102	148.724	1.20394	1.13567e+06	0.0064742	0.1383		86168.4	0	34381	2.06091e+06	159562	14.2198	0	110.333	523.824	1.00326	1060.94	42952.9	42431.7	14.9895	50.4614	2.13027e+06	519.717	456.863	1.90816e+06
26	2000	2015	1	0	0	0.230664	6.13042	3.26217	4.78872e+06	0	0.833524	697.053	0.0820067	543096	0	0.105249		0	7687.54	639951	2.30187e+07	57618.8	146.596	0	75.7263	0	1.00486	448.747	0	0	0	0	0	0	0	0
26	2001	2015	1	0	0	0.234132	6.15394	3.75469	4.43401e+06	0	0.778503	710.633	0.140773	583511	0	0.115855		0	7544.43	602850	2.16012e+07	54809.9	139.578	0	74.7129	0	1.00606	477.581	0	0	0	0	0	0	0	0
26	2002	2015	1	0	0	0.2376	6.17747	4.24721	4.07929e+06	0	0.723483	724.213	0.199539	623925	0	0.126461		0	7401.31	565750	2.01836e+07	52001	132.56	0	73.6994	0	1.00726	506.414	0	1582.97	0	0	0	0	0	0
26	2003	2015	1	0	0	0.241067	6.20099	4.73973	3.72458e+06	0	0.668462	737.793	0.258305	664339	0	0.137067		0	7258.2	528649	1.87661e+07	49192.1	125.543	0	72.686	0	1.00846	535.248	0	4920.66	0	0	0	0	0	0
26	2004	2015	1	0	0	0.244535	6.22451	5.23225	3.36987e+06	0	0.613442	751.373	0.317071	704754	0	0.147674		0	7115.09	491548	1.73485e+07	46383.2	118.525	0	71.6726	48.3346	1.00966	564.082	0	8258.35	0	0	0	0	0	0
26	2005	2015	1	0	0	0.248003	6.24803	5.72476	3.01516e+06	0	0.558421	764.953	0.375837	745168	0	0.15828		0	6971.97	454448	1.5931e+07	43574.4	111.507	0	70.6591	121.175	1.01086	592.915	0	11596	0	0	0	0	0	0
26	2006	2015	1	0	0	0.253169	6.29239	6.43119	113.307	2697418	0.401	778.533	0.434603	785583	0.0003427	0.168886		10781	6828.86	417347	1.45134e+07	40765.5	104.49	0	69.6457	245.178	1.01346	581.313	0	14933.7	0	0	0	0	0	0
26	2007	2015	1	0	0	0.250735	6.30615	6.84559	9.75467e+06	3354520	0.386	792.113	0.493369	825997	0.000998207	0.179493		13010	6685.74	380246	1.30959e+07	37956.6	97.4718	0	68.6323	276.387	1.05697	670.163	0	19705	0	0	0	0	0	0
26	2008	2015	1	0	0	0.260135	6.30996	7.23346	112.221	4029795	0.415	805.693	0.552135	866411	0.00165371	0.190099		17068	6542.63	343145	1.16783e+07	35147.7	90.4541	0	67.6189	334.449	0.96764	717.338	0	22520.3	0	0	0	0	0	0
26	2009	2015	1	0	0	0.265596	6.36275	7.44503	111.902	5000100	0.413	819.273	0.610902	906826	0.00230922	0.200705		25678	6399.51	306045	1.02608e+07	32338.8	83.4364	0	66.6054	404.53	1.02569	694.423	0	25707.8	0	0	0	0	0	0
26	2010	2015	1	0	0	0.261458	6.363	8.1857	113.432	6008539	0.432269	832.853	0.669668	947240	0.00296473	0.211311		45194	6256.4	268944	8.84321e+06	29529.9	76.4187	0	65.592	453.781	1.01473	741.85	0	26234.3	0	0	0	315.045	0	0
26	2011	2015	1	0	0	0.26709	6.36238	8.56398	112.374	7378800	0.464	851.7	0.767054	807628	0.00394951	0.221901		63082.2	3915	213225	6262618	17898	51	0	39.87	537.299	1.01637	743.569	7627	28894.1	18.62	49.8082	2.15259e+06	298.904	228.4	0
26	2012	2015	1	0	0	0.266736	6.37823	8.97865	110.769	8849600	0	858	0.76014	1104296	0.00441293	0.241202		105281	5466	184433	4625941	21291	64.64	0	78.9	602.098	0.987044	791.278	8514	35547.7	20.19	42.24	2.68656e+06	345.59	265.545	0
26	2013	2015	1	0	0	0.28564	6.40233	9.44393	109.596	10419300	0	870.6	0.750172	1256216	0.00369672	0.229615		92865	6197	181304	8412749	29572	63.91	0	87.42	696.352	1.05316	852.035	10622	38371.9	23.08	61.9568	1.95657e+06	373.198	328.245	0
26	2014	2015	1	0	0	0.276394	6.45332	10.0511	108.165	12667000	0	880.8	0.99421	1161479	0.00643431	0.251361		112877	9852	132279	3989411	31836	63.78	0	85.6	758.307	0.999187	880.639	14156	40092.8	23.8779	81.5723	2.93459e+06	425.233	399.474	0
26	2015	2015	1	1	1	0.293633	6.50189	11.0284	107.591	14613477	0	904.2	0.98706	1076178	0.00605559	0.275007		134493	9103	123308	0	17596	67.81	0	0	819.73	1.01727	858.07	17963	45905.7	24.8261	86.5051	3.25868e+06	454.496	457.31	0
26	2016	2015	1	1	1	0.276313	6.54838	11.2716	107.104	16257900	0	917	0.993457	1126347	0.00700495	0.271513		160182	0	0	0	0	0	0	80.48	1012.29	1.04728	894.418	21924	49930.5	25.9727	86.0738	3.5475e+06	485.88	521.809	0
26	2017	2015	1	1	1	0.289615	6.53029	11.635	0	1.66122e+07	0	927.913	1.08103	1.23014e+06	0.00755328	0.285555		164491	5254.6	9239	0	9867.73	27.2947	0	58.498	995.261	1.02528	938.92	21184.1	51648.3	33.5812	106.361	4.18081e+06	599.891	583.968	0
26	2018	2015	1	1	1	0.293083	6.55382	12.1275	0	1.79979e+07	0	941.493	1.1398	1.27056e+06	0.00820878	0.296161		180081	5111.49	0	0	7058.85	20.277	0	57.4846	1068.1	1.02648	967.754	23490.4	54986	37.2039	118.278	4.6403e+06	659.902	650.13	0
26	2019	2015	1	1	1	0.296551	6.57734	12.62	0	1.93836e+07	0	955.073	1.19856	1.31097e+06	0.00886429	0.306768		195670	4968.37	0	0	4249.96	13.2592	0	56.4711	1140.94	1.02769	996.588	25796.8	58323.7	40.8265	130.196	5.09978e+06	719.912	716.292	0
27	2000	2015	1	0	0	0	6.04223	4.35932	4.78872e+06	0	0.717951	373.273	0	0	0.00666999	0.242254		0	1195.55	68643.1	156993	0	98.5382	124.214	65.8932	0	0.991184	0	12174.9	0	4.09153	0	0	457.118	0	971818
27	2001	2015	1	0	0	0.0225166	6.08001	4.89698	4.43401e+06	391681	0.702136	375.062	0	0	0.00747177	0.23915		0	2378.73	71234.6	316576	0	96.2945	115.749	67.1655	0	0.992617	0	14601.4	0	5.04431	5.21413	0	489.245	0	1.18735e+06
27	2002	2015	1	0	0	0.0568925	6.11778	5.43465	4.07929e+06	2.08619e+06	0.686322	376.851	0	0	0.00827355	0.236047		0	3561.91	73826.2	476159	0	94.0509	107.284	68.4377	0	0.99405	0	17027.9	308.686	5.99709	10.8576	0	521.371	0	1.40288e+06
27	2003	2015	1	0	0	0.0912685	6.15556	5.97231	3.72458e+06	3.7807e+06	0.670507	378.64	0	0	0.00907533	0.232943		0	4745.09	76417.8	635742	0	91.8073	98.8196	69.71	0	0.995483	0	19454.3	3602.51	6.94987	16.501	0	553.498	43.2059	1.61841e+06
27	2004	2015	1	0	0	0.125644	6.19333	6.50997	3.36987e+06	5.47521e+06	0.654693	380.43	0.0673899	51935.2	0.0098771	0.22984		0	5928.27	79009.4	795325	0	89.5636	90.3549	70.9823	0	0.996917	49.0015	21880.8	6896.33	7.90266	22.1445	0	585.625	107.332	1.83394e+06
27	2005	2015	1	0	0	0.16002	6.23111	7.04763	3.01516e+06	7.16973e+06	0.638878	382.219	0.164663	231962	0.0106789	0.226736		8808.95	7111.45	81600.9	954908	2768.2	87.32	81.8902	72.2545	3.1086	0.99835	131.218	24307.3	10190.2	8.85544	27.7879	0	617.752	171.457	2.04947e+06
27	2006	2015	1	0	0	0.341616	6.24676	7.33036	113.307	8336700	0.6175	373.16	0.251929	451200	0.0114807	0.223632		49687.4	9966	126198	1172840	23104	99.03	65	80	101.4	0.999821	385.459	15207	13484	9.80822	33.4313	0	649.878	235.583	2.265e+06
27	2007	2015	1	0	0	0.240288	6.2912	8.13272	9.75467e+06	10302894	0.6196	374.48	0	592015	0.0122824	0.220529		48178.7	12545	130523	487262	18746	99.97	37.01	79.88	136.5	0.969896	439.468	25245	17887.8	11.91	42.2985	0	638.367	282.402	2.55394e+06
27	2008	2015	1	0	0	0.218356	6.34025	8.84753	112.221	12368300	0.6094	375.68	0	772041	0.0130842	0.217425		57869.4	13628	104966	1861485	17984	99.9	67.88	77.01	196.922	1.01333	439.203	30065	19559.7	11.53	44.9178	0	711.732	340.333	2.96979e+06
27	2009	2015	1	0	0	0.206415	6.41098	9.00004	111.902	13549931	0.5634	377.49	0.997616	952067	0.013886	0.214322		72340.7	0	0	0	0	0	82.21	61.98	271.96	1.05939	417.296	16922	22677.1	12.11	46.5745	0	725.953	433.33	2.18685e+06
27	2010	2015	1	0	0	0.285283	6.44255	9.8905	113.432	15515164	0.5461	377.92	0.998651	1039879	0.0148082	0.190356		88611.8	15013	70668	2172529	14952	100	90.02	85.54	304	1.01012	517.705	31002	25780.2	13.02	52.3033	0	779.979	505.18	3.17178e+06
27	2011	2015	1	0	0	0.284153	6.47487	10.4014	112.374	18175833	0.5349	513.5	0.9963	1307601	0.0140586	0.218147		101069	14182	84667	2052795	21878	99.9	0	94.36	410.4	1.0043	460.006	104274	29445.2	13.72	61.7695	1.75704e+06	849.143	582.764	3.77456e+06
27	2012	2015	1	0	0	0.324326	6.50596	11.1766	110.769	19877262	0.526	380.9	0.999737	1504601	0.0175435	0.226566		126273	16831	79872	2131857	18163	0.82	0	100	447.7	0.989399	436.224	54093	34447.4	14.68	65.5205	1.92889e+06	890.039	640.625	3.37342e+06
27	2013	2015	1	0	0	0.532104	6.51748	11.2015	109.596	21557271	0.5131	381.6	0.999214	1700901	0.0167862	0.204863		151718	15921	80330	2480607	21842	83.46	0	0	541.3	0.979971	462.127	30399	37427.6	18.13	78.6027	2.0884e+06	917.73	695.765	4.25937e+06
27	2014	2015	1	0	0	0.52272	6.56583	11.7758	108.165	22767060	0.503	386.7	0.993535	1871456	0.0199036	0.192562		174886	15622	140026	8677100	94304	92.01	0	100	574.774	0.991508	594.871	38254	39431.3	18.0254	82.8289	2.1945e+06	931.524	748.738	3.59722e+06
27	2015	2015	1	1	1	0.521815	6.5971	12.4144	107.591	23553298	0.4883	389.07	0.99689	2041481	0.0170234	0.188101		199024	22522	93909	0	30123	82.59	0	100	615	1.0122	1332.9	41023	43210.3	18.4981	83.313	2.48128e+06	922.613	792.242	4.06645e+06
27	2016	2015	1	1	1	0.551964	6.6425	12.8388	107.104	24701013	0.4626	392	0.997449	2200082	0.0195283	0.192755		215657	20086	157495	0	53570	54.76	0	100	816	1.04651	1384.45	41045	46133.4	18.8617	86.5741	2.52095e+06	898.672	861.373	4.55088e+06
27	2017	2015	1	1	1	0.572532	6.68443	13.4996	0	2.75039e+07	0.449104	403.69	1.33194	2.39228e+06	0.0203002	0.189493		224885	21309.6	112700	2.86991e+06	54443.8	60.3964	0	87.5218	799.792	1.01555	1117.82	53425.2	49716	20.2888	95.5092	3.21267e+06	1003.27	940.967	4.63585e+06
27	2018	2015	1	1	1	0.606908	6.7222	14.0372	0	2.91984e+07	0.433289	405.479	1.42921	2.57231e+06	0.021102	0.186389		242891	22492.8	115291	3.02949e+06	58750.1	58.1527	0	88.7941	866.183	1.01698	1200.04	55851.7	53009.8	21.2416	101.153	3.56096e+06	1035.4	1005.09	4.85138e+06
27	2019	2015	1	1	1	0.641284	6.75998	14.5749	0	3.08929e+07	0.417475	407.269	1.52649	2.75233e+06	0.0219038	0.183285		260898	23676	117883	3.18907e+06	63056.4	55.9091	0	90.0664	932.573	1.01842	1282.25	58278.2	56303.7	22.1944	106.796	3.90924e+06	1067.53	1069.22	5.06691e+06
28	2000	2015	1	0	0	0.230664	6.13042	1.78947	4.78872e+06	0	0.0242636	416.978	0.037318	38200	0.0091916	0.200747		0	10271.1	90572.5	1.26821e+06	13196.5	79.549	103.925	46.2109	0	1.04275	448.747	0	1074.79	8.81297	16.3446	0	145.66	0	4.6972e+06
28	2001	2015	1	0	0	0.234132	6.15394	2.34938	4.43401e+06	0	0.0415455	419.543	0.107842	38200	0.00963246	0.199367		0	10003.1	87505.6	1.27285e+06	15020.2	79.4294	96.8013	49.0163	0	1.04001	477.581	3972.74	3869.65	10.3149	23.6229	0	199.72	0	4.87613e+06
28	2002	2015	1	0	0	0.2376	6.17747	2.9093	4.07929e+06	0	0.0588273	422.107	0.178366	38200	0.0100733	0.197988		0	9735.21	84438.6	1.2775e+06	16844	79.3098	89.6775	51.8216	0	1.03727	506.414	10872.8	6664.52	11.8167	30.9011	0	253.781	0	5.05507e+06
28	2003	2015	1	0	0	0.241067	6.20099	3.46922	3.72458e+06	0	0.0761091	424.672	0.248891	38200	0.0105142	0.196608		0	9467.28	81371.7	1.28215e+06	18667.7	79.1902	82.5536	54.627	0	1.03452	535.248	17772.9	9459.38	13.3186	38.1793	0	307.842	64.1668	5.23401e+06
28	2004	2015	1	0	0	0.244535	6.22451	4.02914	3.36987e+06	0	0.0933909	427.236	0.319415	38200	0.0109551	0.195229		0	9199.35	78304.8	1.2868e+06	20491.4	79.0706	75.4298	57.4323	48.3346	1.03178	564.082	24673	12254.2	14.8205	45.4575	0	361.902	136.808	5.41295e+06
28	2005	2015	1	0	0	0.248003	6.24803	4.58906	3.01516e+06	192196	0.110673	429.801	0.389939	38200	0.0113959	0.193849		9061.56	8931.41	75237.8	1.29144e+06	22315.1	78.951	68.306	60.2376	121.175	1.02904	592.915	31573.1	15049.1	16.3224	52.7358	0	415.963	209.449	5.59189e+06
28	2006	2015	1	0	0	0.253169	6.29239	5.24275	113.307	631628	0.137	417.797	0.347571	38200	0.0118368	0.192469		35061.5	7984.18	69062.6	797507	28520.8	76.1273	45.0736	59.8051	245.178	1.00847	581.313	36324	17844	17.8242	60.014	0	470.024	282.091	5.77083e+06
28	2007	2015	1	0	0	0.250735	6.30615	5.83561	9.75467e+06	770414	0.135	422.501	0.330949	38200	0.0122776	0.19109		43879.3	8517.05	67749.6	840498	24525.4	77.0793	50.0784	65.4194	276.387	1.01003	670.163	43462.3	21081	20.34	71.5942	0	480.548	379.017	5.80806e+06
28	2008	2015	1	0	0	0.260135	6.30996	6.12538	112.221	882206	0.155	427.241	0.335398	38200	0.0127185	0.18971		54856.6	8134.07	63771.2	1.00161e+06	21683.4	78.7751	56.2903	69.1482	334.449	1.02095	717.338	52754.7	23168.2	20.9601	74.9442	0	548.718	422.795	5.88064e+06
28	2009	2015	1	0	0	0.265596	6.36275	7.06524	111.902	1009585	0.184	430.016	0.999679	38200	0.0131594	0.188331		72444.9	7705.22	58580	1.03232e+06	18974.5	78.8716	59.3137	71.8611	404.53	1.05557	694.423	55218.9	26222.7	21.7966	79.7971	0	597.015	500.241	5.44026e+06
28	2010	2015	1	0	0	0.261458	6.363	7.14087	113.432	1314500	0.196	435.911	0.99299	38200	0.0130497	0.175949		89042.4	7935.92	59520	1.22768e+06	18776.1	82.141	70.4389	77.0939	453.781	1.03579	741.85	64029.4	28720.6	22.5665	84.324	0	703.665	568.741	7.03306e+06
28	2011	2015	1	0	0	0.26709	6.36238	7.78419	112.374	1513225	0.212	550.873	0.990383	38200	0.0141463	0.184687		99551.2	7734.08	65414.5	2.60249e+06	51294.5	76.5802	0	79.3297	537.299	1.01432	743.569	75882.7	32145	24.2132	93.1664	2.18593e+06	806.969	639.637	7.18408e+06
28	2012	2015	1	0	0	0.266736	6.37823	8.26003	110.769	1854011	0.231	441.512	0.990127	38200	0.0146282	0.201541		121777	7274.26	59491.8	2.26928e+06	48979.9	78.3541	0	83.5111	602.098	1.01233	791.278	86874.7	34629.8	26.4125	102.345	2.49915e+06	862.677	693.859	7.25244e+06
28	2013	2015	1	0	0	0.28564	6.40233	9.03663	109.596	2221707	0.259	441.241	0.992699	38200	0.0154208	0.186375		143483	7086.1	53915.9	2.3351e+06	38751.7	81.4615	0	74.6039	696.352	0.975693	852.035	95421	37252.1	30.2453	116.211	2.84314e+06	902.384	777.188	7.44149e+06
28	2014	2015	1	0	0	0.276394	6.45332	9.92589	108.165	2581125	0.277	445.286	0.990786	38200	0.0162252	0.178112		162107	6782.45	55073	2.40613e+06	43354.9	82.5167	0	89.8465	758.307	0.970092	880.639	100278	39517.6	30.7268	120.152	2.92794e+06	922.575	861.239	7.5993e+06
28	2015	2015	1	1	1	0.293633	6.50189	10.4045	107.591	2872055	0.285	444.56	0.99673	38200	0.0147798	0.177048		179568	6572.47	48701.5	0	48312.2	80.1238	0	90.4455	819.73	1.05926	858.07	93665.4	43138.7	32.28	128.96	3.37529e+06	917.443	944.597	7.16127e+06
28	2016	2015	1	1	1	0.276313	6.54838	10.6131	107.104	2775471	0.287	440.133	0.97661	38200	0.0162098	0.175976		191845	4836.31	23918.7	0	22658.6	68.5373	0	86.7022	1012.29	0.975918	894.418	98799.9	46281.5	31.3048	128.947	3.58588e+06	931.577	1028.87	6.74937e+06
28	2017	2015	1	1	1	0.289615	6.53029	11.3081	0	3.15797e+06	0.318055	460.576	1.23623	38200	0.0166863	0.177294		207959	5716.24	38434.7	1.34721e+06	44199.8	77.5159	0	93.9017	995.261	0.996131	938.92	114374	48587.5	34.3449	140.074	4.38781e+06	1064.69	1081.15	7.73916e+06
28	2018	2015	1	1	1	0.293083	6.55382	11.868	0	3.40512e+06	0.335336	463.14	1.30675	38200	0.0171271	0.175915		224534	5448.31	35367.7	1.35186e+06	46023.5	77.3963	0	96.7071	1068.1	0.993389	967.754	121274	51382.3	35.8468	147.353	4.86891e+06	1118.75	1153.79	7.9181e+06
28	2019	2015	1	1	1	0.296551	6.57734	12.4279	0	3.65227e+06	0.352618	465.705	1.37728	38200	0.017568	0.174535		241109	5180.38	32300.8	1.35651e+06	47847.2	77.2767	0	99.5124	1140.94	0.990647	996.588	128175	54177.2	37.3487	154.631	5.35002e+06	1172.81	1226.43	8.09704e+06
29	2000	2012	1	0	0	0.149285	6.28179	6.21492	7.19376e+06	0	0.529751	636.451	0	0	9.35178e-05	0.258109		0	7574.49	23232.5	126340	0	107.323	133.644	67.96	0	1.02192	0	0	5925.43	20.2768	51.356	0	248.211	82.8308	250725
29	2001	2012	1	0	0	0.152463	6.29821	6.79849	6.6609e+06	778470	0.528019	645.582	0.0389072	0	0.000548337	0.254732		0	7639.91	24038.5	307211	0	105.066	124.462	69.8709	0	1.02148	0	0	8376.12	21.1393	54.3198	0	324.118	148.895	330152
29	2002	2012	1	0	0	0.15564	6.31464	7.38206	6.12803e+06	3.14397e+06	0.526287	654.713	0.115239	0	0.00100316	0.251354		0	7705.33	24844.4	488082	0	102.809	115.28	71.7818	0	1.02105	0	0	10826.8	22.0018	57.2837	0	400.025	214.96	409579
29	2003	2012	1	0	0	0.158817	6.33107	7.96563	5.59517e+06	5.50948e+06	0.524554	663.844	0.191571	0	0.00145797	0.247977		0	7770.75	25650.4	668953	0	100.552	106.098	73.6927	0	1.02061	49.2583	0	13277.5	22.8642	60.2475	0	475.932	281.024	489005
29	2004	2012	1	0	0	0.161994	6.34749	8.5492	5.06231e+06	7.87498e+06	0.522822	672.975	0.267903	0	0.00191279	0.2446		0	7836.16	26456.4	849825	296.255	98.2954	96.9155	75.6036	0	1.02017	104.44	822.373	15728.2	23.7267	63.2114	0	551.839	347.089	568432
29	2005	2012	1	0	0	0.165172	6.36392	9.13277	4.52944e+06	1.02405e+07	0.521089	682.105	0.344235	73086.4	0.00236761	0.241222		0	7901.58	27262.4	1.0307e+06	4571.04	96.0384	87.7335	77.5145	0	1.01973	159.621	4977.71	18178.9	24.5892	66.1752	0	627.746	413.153	647859
29	2006	2012	1	0	0	0.154838	6.38746	9.45511	113.2	12816666	0.533836	690.85	0.294608	372700	0.00282243	0.237845		45820.3	7469	27748	49536	11842	99.97	60	73	158.781	1.00482	220.647	13616	20629.6	25.4517	69.1391	0	703.653	479.218	727286
29	2007	2012	1	0	0	0.15071	6.42505	10.07	14653827	14653827	0.518295	700.2	0.29663	466932	0.00327725	0.234467		61868.8	6906	26827	127839	11350	99.54	60	73.04	206.901	1.05855	233.668	15626	20708.5	26.53	73.268	0	759.508	539.554	1.04717e+06
29	2008	2012	1	0	0	0.169757	6.42987	10.8679	110.1	17161616	0.505162	710.1	0.302591	663855	0.00373207	0.23109		79243.3	7006	25641	410813	8804	99.64	77	91	321.744	0.99624	271.312	16067	23862.8	27.77	76.4935	0	818.701	611.757	1.25064e+06
29	2009	2012	1	0	0	0.176435	6.46104	11.5946	110	18012287	0.482432	717.5	0.976111	860778	0.00418689	0.227712		110282	8098	23905	608789	5271	99.57	76.98	90.89	412.512	1.03829	290.917	16484	35311.4	27.19	74.96	0	826.287	680.865	87694.6
29	2010	2012	1	0	0	0.200771	6.44198	12.5744	112.2	22031199	0.5062	730.89	0.990833	912958	0.00554392	0.234829		144809	6871	25832	1063010	6134	99.6	85.07	100	507.014	0.978673	509.099	23257	30392.2	28.14	76.51	0	1026.63	768.858	1.04569e+06
29	2011	2012	1	0	0	0.23472	6.40666	12.7126	111.3	25851998	0.525569	734.8	0.997414	1164888	0.00428408	0.205702		153039	11366	43616	1654560	58812	0	0	90.25	628.629	1.03354	523.825	29279	31616.9	29.95	85.78	2.30884e+06	1186.76	812.85	1.21171e+06
29	2012	2012	1	1	1	0.194778	6.41078	13.3571	109.6	28124212	0.525909	744.4	0.993552	1425818	0.00473948	0.236783		189187	11666	44476	16085660	47863	49.95	0	92.61	0	1.01524	711.952	35611	34354.4	30.86	90.16	2.65233e+06	1259.07	863.322	1.25421e+06
29	2013	2012	1	1	1	0.185139	6.46704	13.6892	108.2	30129850	0.522666	754.3	0.993371	1722799	0.00587013	0.199965		235767	8925	40689	1742600	54621	99.58	0	74.44	830	1.00741	622.115	41023	36071.6	31.84	90.912	2.92394e+06	1306.68	933.449	1.32059e+06
29	2014	2012	1	1	1	0.190639	6.48601	14.521	106.5	31333822	0.519094	768.4	0.987116	1897102	0.00916777	0.197462		272893	9490	39803	1532345	63451	99.88	0	93.55	920	1.01593	675.642	34242	39111.4	32.6899	93.6459	3.10136e+06	1324.6	965.733	1.55098e+06
29	2015	2012	1	1	1	0.191525	6.56125	14.8546	106.8	33206328	0.482589	774.36	0.996126	2109070	0.0038067	0.213384		310326	8926	32712	0	50879	100	0	100	1030	1.02089	663.451	47296	43943.5	33.4493	95.5845	3.88929e+06	1320.71	1086.83	1.37651e+06
29	2016	2012	1	1	1	0.177274	6.61003	15.2797	106.8	35446800	0.495894	780	0.996154	2203968	0.00863105	0.211292		348107	4512	21832	0	13390	59.73	0	100	1460	1.01854	675.161	56506	45711.1	33.5352	97.0882	3.97086e+06	1382.46	1162.5	1.49614e+06
29	2017	2012	1	1	1	0.203299	6.56102	16.1356	0	3.86265e+07	0.500301	791.676	1.26022	2.43616e+06	0.00782544	0.200693		361843	8686.6	36934.2	3.20115e+06	55868.4	68.9544	0	100.445	1238.94	1.01447	821.796	54841.7	47587.2	34.9392	101.741	4.80416e+06	1538.63	1205.93	1.60098e+06
29	2018	2012	1	1	1	0.206476	6.57745	16.7192	0	4.0992e+07	0.498568	800.807	1.33655	2.63309e+06	0.00828026	0.197315		392585	8752.02	37740.1	3.38202e+06	60143.2	66.6974	0	102.356	1347.31	1.01404	876.977	58997.1	50037.9	35.8016	104.705	5.33497e+06	1614.54	1271.99	1.68041e+06
29	2019	2012	1	1	1	0.209653	6.59388	17.3028	0	4.33575e+07	0.496836	809.938	1.41288	2.83001e+06	0.00873508	0.193938		423326	8817.44	38546.1	3.56289e+06	64418	64.4404	0	104.267	1455.69	1.0136	932.158	63152.4	52488.6	36.6641	107.669	5.86579e+06	1690.44	1338.06	1.75984e+06
30	2000	2015	1	0	0	0.230664	6.13042	3.96643	4.78872e+06	0	0.497406	74	0	0	0.0091916	0.200747		0	0	0	0	0	0	0	0	0	1.01122	448.747	0	1074.79	8.81297	16.3446	0	145.66	0	4.6972e+06
30	2001	2015	1	0	0	0.234132	6.15394	4.47466	4.43401e+06	0	0.494005	74	0	0	0.00963246	0.199367		0	0	0	0	0	0	0	0	0	1.0111	477.581	3972.74	3869.65	10.3149	23.6229	0	199.72	0	4.87613e+06
30	2002	2015	1	0	0	0.2376	6.17747	4.9829	4.07929e+06	0	0.490604	74	0	0	0.0100733	0.197988		0	0	0	0	0	0	0	0	0	1.01097	506.414	10872.8	6664.52	11.8167	30.9011	0	253.781	0	5.05507e+06
30	2003	2015	1	0	0	0.241067	6.20099	5.49113	3.72458e+06	0	0.487203	74	0	0	0.0105142	0.196608		0	0	0	0	0	0	0	0	0	1.01084	535.248	17772.9	9459.38	13.3186	38.1793	0	307.842	64.1668	5.23401e+06
30	2004	2015	1	0	0	0.244535	6.22451	5.99937	3.36987e+06	68142.5	0.483802	74	0	74273.4	0.0109551	0.195229		0	0	0	0	0	0	0	0	48.3346	1.01072	564.082	24673	12254.2	14.8205	45.4575	0	361.902	136.808	5.41295e+06
30	2005	2015	1	0	0	0.248003	6.24803	6.5076	3.01516e+06	178562	0.4804	74	0	252885	0.0113959	0.193849		0	0	0	0	0	0	0	0	121.175	1.01059	592.915	31573.1	15049.1	16.3224	52.7358	0	415.963	209.449	5.59189e+06
30	2006	2015	1	0	0	0.253169	6.29239	7.02221	113.307	374386	0.454064	74	0	480916	0.0118368	0.192469		2770	0	0	0	0	0	0	0	245.178	1.00994	581.313	36324	17844	17.8242	60.014	0	470.024	282.091	5.77083e+06
30	2007	2015	1	0	0	0.250735	6.30615	7.52191	9.75467e+06	443600	0.464822	74	0	610110	0.0122776	0.19109		3346	0	0	0	0	0	0	0	276.387	1.01072	670.163	43462.3	21081	20.34	71.5942	0	480.548	379.017	5.80806e+06
30	2008	2015	1	0	0	0.260135	6.30996	8.04177	112.221	517800	0.473758	74	0	788722	0.0127185	0.18971		3981	0	0	0	0	0	0	0	334.449	1.00909	717.338	52754.7	23168.2	20.9601	74.9442	0	548.718	422.795	5.88064e+06
30	2009	2015	1	0	0	0.265596	6.36275	8.53159	111.902	579000	0.463345	74	0	967334	0.0131594	0.188331		5147	0	0	0	0	0	0	0	404.53	1.01127	694.423	55218.9	26222.7	21.7966	79.7971	0	597.015	500.241	5.44026e+06
30	2010	2015	1	0	0	0.261458	6.363	9.03657	113.432	670700	0.470287	74	0	1.01789e+06	0.0130497	0.175949		5807	0	0	0	0	0	0	0	453.781	1.01065	741.85	64029.4	28720.6	22.5665	84.324	0	703.665	568.741	7.03306e+06
30	2011	2015	1	0	0	0.26709	6.36238	9.55678	112.374	754000	0.486776	74	0	1.29266e+06	0.0141463	0.184687		6200.3	0	0	0	0	0	0	0	537.299	1.00888	743.569	75882.7	32145	24.2132	93.1664	2.18593e+06	806.969	639.637	7.18408e+06
30	2012	2015	1	0	0	0.266736	6.37823	10.0579	110.769	897500	0.476428	74	0	1.52256e+06	0.0146282	0.201541		8827.76	0	0	0	0	0	0	0	602.098	1.01075	791.278	86874.7	34629.8	26.4125	102.345	2.49915e+06	862.677	693.859	7.25244e+06
30	2013	2015	1	0	0	0.28564	6.40233	10.5796	109.596	1045000	0.470595	74	0	1.7587e+06	0.0154208	0.186375		12316.9	0	0	0	0	0	0	0	696.352	1.00836	852.035	95421	37252.1	30.2453	116.211	2.84314e+06	902.384	777.188	7.44149e+06
30	2014	2015	1	0	0	0.276394	6.45332	11.0888	108.165	1171100	0.457124	74	0	1.91021e+06	0.0162252	0.178112		15258.2	0	0	0	0	0	0	0	758.307	1.00944	880.639	100278	39517.6	30.7268	120.152	2.92794e+06	922.575	861.239	7.5993e+06
30	2015	2015	1	1	1	0.293633	6.50189	11.6041	107.591	1320200	0.428902	74	0	2.06468e+06	0.0147798	0.177048		17264.6	0	0	0	0	0	0	0	819.73	1.01161	858.07	93665.4	43138.7	32.28	128.96	3.37529e+06	917.443	944.597	7.16127e+06
30	2016	2015	1	1	1	0.276313	6.54838	12.0859	107.104	1478600	0.413826	74	0	2.15635e+06	0.0162098	0.175976		22070.9	0	0	0	0	0	0	0	1012.29	1.00737	894.418	98799.9	46281.5	31.3048	128.947	3.58588e+06	931.577	1028.87	6.74937e+06
30	2017	2015	1	1	1	0.289615	6.53029	12.6064	0	1.5036e+06	0.439587	74	0	2.39623e+06	0.0166863	0.177294		20455.7	0	0	0	0	0	0	0	995.261	1.00906	938.92	114374	48587.5	34.3449	140.074	4.38781e+06	1064.69	1081.15	7.73916e+06
30	2018	2015	1	1	1	0.293083	6.55382	13.1147	0	1.61402e+06	0.436185	74	0	2.57484e+06	0.0171271	0.175915		22304.5	0	0	0	0	0	0	0	1068.1	1.00894	967.754	121274	51382.3	35.8468	147.353	4.86891e+06	1118.75	1153.79	7.9181e+06
30	2019	2015	1	1	1	0.296551	6.57734	13.6229	0	1.72444e+06	0.432784	74	0	2.75345e+06	0.017568	0.174535		24153.3	0	0	0	0	0	0	0	1140.94	1.00881	996.588	128175	54177.2	37.3487	154.631	5.35002e+06	1172.81	1226.43	8.09704e+06
31	2000	2015	1	0	0	0.230664	6.13042	1.09405	4.78872e+06	0	0.3071	416.978	0.037318	139200	0.0091916	0.200747		0	10271.1	90572.5	1.26821e+06	13196.5	79.549	103.925	46.2109	0	1.00767	448.747	0	1074.79	8.81297	16.3446	0	145.66	0	4.6972e+06
31	2001	2015	1	0	0	0.234132	6.15394	1.52635	4.43401e+06	0	0.319364	419.543	0.107842	139200	0.00963246	0.199367		0	10003.1	87505.6	1.27285e+06	15020.2	79.4294	96.8013	49.0163	0	1.00666	477.581	3972.74	3869.65	10.3149	23.6229	0	199.72	0	4.87613e+06
31	2002	2015	1	0	0	0.2376	6.17747	1.95865	4.07929e+06	0	0.331627	422.107	0.178366	139200	0.0100733	0.197988		0	9735.21	84438.6	1.2775e+06	16844	79.3098	89.6775	51.8216	0	1.00565	506.414	10872.8	6664.52	11.8167	30.9011	0	253.781	0	5.05507e+06
31	2003	2015	1	0	0	0.241067	6.20099	2.39094	3.72458e+06	0	0.343891	424.672	0.248891	139200	0.0105142	0.196608		0	9467.28	81371.7	1.28215e+06	18667.7	79.1902	82.5536	54.627	0	1.00463	535.248	17772.9	9459.38	13.3186	38.1793	0	307.842	64.1668	5.23401e+06
31	2004	2015	1	0	0	0.244535	6.22451	2.82324	3.36987e+06	272888	0.356155	427.236	0.319415	139200	0.0109551	0.195229		0	9199.35	78304.8	1.2868e+06	20491.4	79.0706	75.4298	57.4323	48.3346	1.00362	564.082	24673	12254.2	14.8205	45.4575	0	361.902	136.808	5.41295e+06
31	2005	2015	1	0	0	0.248003	6.24803	3.25553	3.01516e+06	1.24403e+06	0.368418	429.801	0.389939	139200	0.0113959	0.193849		9061.56	8931.41	75237.8	1.29144e+06	22315.1	78.951	68.306	60.2376	121.175	1.00261	592.915	31573.1	15049.1	16.3224	52.7358	0	415.963	209.449	5.59189e+06
31	2006	2015	1	0	0	0.253169	6.29239	3.64262	113.307	2959704	0.391	417.797	0.347571	139200	0.0118368	0.192469		35061.5	7984.18	69062.6	797507	28520.8	76.1273	45.0736	59.8051	245.178	0.962088	581.313	36324	17844	17.8242	60.014	0	470.024	282.091	5.77083e+06
31	2007	2015	1	0	0	0.250735	6.30615	3.87199	9.75467e+06	3131995	0.382	422.501	0.330949	139200	0.0122776	0.19109		43879.3	8517.05	67749.6	840498	24525.4	77.0793	50.0784	65.4194	276.387	1.02799	670.163	43462.3	21081	20.34	71.5942	0	480.548	379.017	5.80806e+06
31	2008	2015	1	0	0	0.260135	6.30996	4.59198	112.221	3881499	0.398	427.241	0.335398	139200	0.0127185	0.18971		54856.6	8134.07	63771.2	1.00161e+06	21683.4	78.7751	56.2903	69.1482	334.449	0.97012	717.338	52754.7	23168.2	20.9601	74.9442	0	548.718	422.795	5.88064e+06
31	2009	2015	1	0	0	0.265596	6.36275	4.95457	111.902	4447133	0.394	430.016	0.999679	139200	0.0131594	0.188331		72444.9	7705.22	58580	1.03232e+06	18974.5	78.8716	59.3137	71.8611	404.53	0.994786	694.423	55218.9	26222.7	21.7966	79.7971	0	597.015	500.241	5.44026e+06
31	2010	2015	1	0	0	0.261458	6.363	5.46409	113.432	5579917	0.42	435.911	0.99299	139200	0.0130497	0.175949		89042.4	7935.92	59520	1.22768e+06	18776.1	82.141	70.4389	77.0939	453.781	1.05083	741.85	64029.4	28720.6	22.5665	84.324	0	703.665	568.741	7.03306e+06
31	2011	2015	1	0	0	0.26709	6.36238	6.27324	112.374	7029369	0.471	550.873	0.990383	139200	0.0141463	0.184687		99551.2	7734.08	65414.5	2.60249e+06	51294.5	76.5802	0	79.3297	537.299	1.05554	743.569	75882.7	32145	24.2132	93.1664	2.18593e+06	806.969	639.637	7.18408e+06
31	2012	2015	1	0	0	0.266736	6.37823	6.44294	110.769	8185631	0.475	441.512	0.990127	139200	0.0146282	0.201541		121777	7274.26	59491.8	2.26928e+06	48979.9	78.3541	0	83.5111	602.098	0.970344	791.278	86874.7	34629.8	26.4125	102.345	2.49915e+06	862.677	693.859	7.25244e+06
31	2013	2015	1	0	0	0.28564	6.40233	6.71393	109.596	9373116	0.482	441.241	0.992699	139200	0.0154208	0.186375		143483	7086.1	53915.9	2.3351e+06	38751.7	81.4615	0	74.6039	696.352	0.963142	852.035	95421	37252.1	30.2453	116.211	2.84314e+06	902.384	777.188	7.44149e+06
31	2014	2015	1	0	0	0.276394	6.45332	6.81715	108.165	10608714	0.488	445.286	0.990786	139200	0.0162252	0.178112		162107	6782.45	55073	2.40613e+06	43354.9	82.5167	0	89.8465	758.307	0.985499	880.639	100278	39517.6	30.7268	120.152	2.92794e+06	922.575	861.239	7.5993e+06
31	2015	2015	1	1	1	0.293633	6.50189	7.76907	107.591	11400132	0.474	444.56	0.99673	139200	0.0147798	0.177048		179568	6572.47	48701.5	0	48312.2	80.1238	0	90.4455	819.73	0.999146	858.07	93665.4	43138.7	32.28	128.96	3.37529e+06	917.443	944.597	7.16127e+06
31	2016	2015	1	1	1	0.276313	6.54838	7.80087	107.104	11182439	0.487	440.133	0.97661	139200	0.0162098	0.175976		191845	4836.31	23918.7	0	22658.6	68.5373	0	86.7022	1012.29	0.982423	894.418	98799.9	46281.5	31.3048	128.947	3.58588e+06	931.577	1028.87	6.74937e+06
31	2017	2015	1	1	1	0.289615	6.53029	8.44309	0	1.28977e+07	0.515582	460.576	1.23623	139200	0.0166863	0.177294		207959	5716.24	38434.7	1.34721e+06	44199.8	77.5159	0	93.9017	995.261	0.990464	938.92	114374	48587.5	34.3449	140.074	4.38781e+06	1064.69	1081.15	7.73916e+06
31	2018	2015	1	1	1	0.293083	6.55382	8.87539	0	1.38689e+07	0.527845	463.14	1.30675	139200	0.0171271	0.175915		224534	5448.31	35367.7	1.35186e+06	46023.5	77.3963	0	96.7071	1068.1	0.989452	967.754	121274	51382.3	35.8468	147.353	4.86891e+06	1118.75	1153.79	7.9181e+06
31	2019	2015	1	1	1	0.296551	6.57734	9.30769	0	1.484e+07	0.540109	465.705	1.37728	139200	0.017568	0.174535		241109	5180.38	32300.8	1.35651e+06	47847.2	77.2767	0	99.5124	1140.94	0.98844	996.588	128175	54177.2	37.3487	154.631	5.35002e+06	1172.81	1226.43	8.09704e+06
32	2000	2013	1	0	0	0.849018	5.56072	0	4.78872e+06	0	0.413235	572.062	0	0	0.00738215	0.240687		0	14201.9	90576.5	186959	20412	89.1896	82.6013	20.7635	0	1.01748	9.1475	0	1044.61	11.6305	0	0	0	0	0
32	2001	2013	1	0	0	0.822714	5.62063	0	4.43401e+06	0	0.417036	571.84	0	0	0.00726518	0.234397		0	13866	86508.9	242666	20131.2	89.7309	76.9509	26.5282	0	1.01815	26.0588	0	3529.22	12.4464	0	0	0	0	0
32	2002	2013	1	0	0	0.796411	5.68054	0.503921	4.07929e+06	0	0.420838	571.618	0.039209	0	0.0071482	0.228106		0	13530.1	82441.3	298373	19850.4	90.2722	71.3005	32.2928	0	1.01882	42.9702	0	6013.83	13.2624	0	0	10.5203	0	0
32	2003	2013	1	0	0	0.770107	5.74045	1.06291	3.72458e+06	0	0.42464	571.395	0.122736	0	0.00703122	0.221815		0	13194.2	78373.7	354080	19569.6	90.8135	65.6502	38.0575	0	1.01949	59.8815	0	8498.44	14.0784	0	0	87.8127	0	0
32	2004	2013	1	0	0	0.743804	5.80037	1.6219	3.36987e+06	1.63189e+06	0.428442	571.173	0.206264	0	0.00691424	0.215524		0	12858.2	74306.1	409787	19288.9	91.3547	59.9998	43.8221	0	1.02016	76.7928	0	10983.1	14.8944	0	0	165.105	10.6011	11514.8
32	2005	2013	1	0	0	0.7175	5.86028	2.18089	3.01516e+06	3.95202e+06	0.432244	570.951	0.289792	132692	0.00679726	0.209233		0	12522.3	70238.5	465494	19008.1	91.896	54.3495	49.5867	0	1.02083	93.7041	0	13467.7	15.7104	7.93174	0	242.397	90.7208	44259.2
32	2006	2013	1	0	0	0.635547	5.95678	3.03708	113.307	7238368	0.4186	607.75	0.233945	303900	0.00668028	0.202942		19610.8	8800	58123	160795	28268	87.7	38.17	41.67	141.201	1.0275	143.144	15143	15952.3	16.5263	22.4198	0	319.69	170.841	77003.5
32	2007	2013	1	0	0	0.650894	5.9706	3.33897	9.75467e+06	8640845	0.4218	611.99	0.235347	398709	0.00656331	0.196652		23195.7	12504	65625	86618	15831	91.19	38.26	41.03	140.742	1.0303	107.709	19020	19656.7	17.59	55.7695	0	364.471	291.456	142111
32	2008	2013	1	0	0	0.623352	5.98915	3.93058	112.221	10496975	0.446	614.16	0.233245	531717	0.00644633	0.190361		28533.7	10119	56616	85704	14672	98.13	39.74	51.19	146.86	1.02715	124.677	21204	21758.9	17.83	52.0019	0	442.082	323.235	178866
32	2009	2013	1	0	0	0.739193	6.11714	4.5007	111.902	12392306	0.4285	616.69	0.997957	664726	0.00632935	0.18407		45978	13091	63613	910332	9734	98.49	49.68	100	219.239	1.01544	181.689	23637	23823.4	18.83	58.7881	0	504.961	428.716	125618
32	2010	2013	1	0	0	0.646083	6.1566	4.68266	113.432	14915686	0.4594	623.11	1.00128	700205	0.0058302	0.167308		61322	12575	47728	196202	10516	93.39	59.07	100	62.949	1.02383	176.532	25068	25948.1	19.73	64.1322	0	630.796	484.425	160705
32	2011	2013	1	0	0	0.663229	6.22382	4.95962	112.374	18111879	0.491	127	0.998425	938944	0.00620846	0.156952		68991	9965	46373	2506083	21248	94.18	0	100	411.3	0.987241	178.39	30800	26926.4	20.3	67.0739	1.94588e+06	776.71	547.81	201608
32	2012	2013	1	0	0	0.364744	6.28909	5.92738	110.769	20385039	0.4947	629	0.997456	1067314	0.00574939	0.206481		94657.2	12855	39364	1653089	19376	96.49	0	100	489.612	1.04314	197.877	41038	28984.7	21.49	126.973	2.17045e+06	858.46	619.334	323493
32	2013	2013	1	1	1	0.453545	6.33187	6.78379	109.596	22649358	0.4867	607.2	1.00626	1225251	0.00640926	0.159608		128416	11601	37246	1695711	20730	97.96	0	100	778.5	1.04243	222.122	50784	31693.1	23.09	129.9	2.63333e+06	914.611	695.871	287755
32	2014	2013	1	1	1	0.405007	6.39686	7.26692	108.165	25141545	0.4765	608.7	0.998686	1349152	0.00630811	0.141091		154772	10202	38704	1502560	23168	97.42	0	100	724.5	0.999139	263.207	60649	34849.1	23.39	147.636	2.95088e+06	974.482	795.742	379751
32	2015	2013	1	1	1	0.478819	6.45501	8.06657	107.591	27090169	0.4568	609.18	0.999557	1486445	0.00550053	0.137651		185791	9799	33333	0	17636	95.26	0	100	851.2	1.04295	268.734	74116	39030.9	23.6724	156.942	3.42155e+06	992.702	895.561	389719
32	2016	2013	1	1	1	0.496065	6.53028	8.38877	107.104	29538202	0.4256	611	0.998363	1571801	0.00502411	0.143257		200693	4064	17436	0	9379	96.37	0	92.03	959.581	1.03426	282.812	88889	43505	24.22	161.826	3.64172e+06	988.705	1032.84	381349
32	2017	2013	1	1	1	0.401859	6.57921	8.88876	0	3.17935e+07	0.477865	568.282	1.29212	1.72879e+06	0.00539352	0.133743		208327	8491.31	21427.2	1.13398e+06	15638.8	98.3913	0	118.762	1004.8	1.02887	296.64	83361.4	43283	25.5021	181.789	4.32989e+06	1169.91	1052.16	437191
32	2018	2013	1	1	1	0.375556	6.63912	9.44775	0	3.41136e+07	0.481667	568.06	1.37565	1.8618e+06	0.00527654	0.127453		227715	8155.39	17359.6	1.18968e+06	15358	98.9325	0	124.527	1097.63	1.02954	313.551	90431.6	45767.6	26.3181	196.277	4.81235e+06	1247.2	1132.28	469936
32	2019	2013	1	1	1	0.349252	6.69903	10.0067	0	3.64338e+07	0.485469	567.837	1.45918	1.99481e+06	0.00515957	0.121162		247103	7819.47	13291.9	1.24539e+06	15077.3	99.4738	0	130.292	1190.47	1.03021	330.463	97501.7	48252.2	27.1341	210.765	5.2948e+06	1324.49	1212.4	502680
33	2000	2012	1	0	0	0.0350794	6.45105	7.18857	9.23544e+06	0	0.716651	343.46	0.239876	0	0.00960007	0.125079		0	51052	110611	904970	0	96.7203	149.095	100	0	0.967229	775.009	150199	3685.12	7.0216	17.4766	0	383.262	0	7.75534e+06
33	2001	2012	1	0	0	0.0388569	6.48478	7.73208	8.55134e+06	0	0.702144	345.29	0.296016	0	0.0122784	0.127645		0	48465.1	104834	926340	0	96.7709	138.682	100	0	0.971883	885.436	158819	7436.27	8.36576	34.1187	0	495.189	0	8.25372e+06
33	2002	2012	1	0	0	0.0426343	6.51851	8.27558	7.86724e+06	0	0.687638	347.12	0.352156	0	0.0149567	0.130211		0	45878.2	99056.6	947709	0	96.8215	128.268	100	0	0.976537	995.863	167438	11187.4	9.70992	50.7609	0	607.115	0	8.75211e+06
33	2003	2012	1	0	0	0.0464118	6.55224	8.81908	7.18314e+06	1.12923e+06	0.673132	348.949	0.408296	314846	0.0176351	0.132777		10719.7	43291.3	93279.6	969079	0	96.8722	117.855	100	0	0.981191	1106.29	176057	14938.6	11.0541	67.403	0	719.041	0	9.2505e+06
33	2004	2012	1	0	0	0.0501893	6.58597	9.36259	6.49904e+06	5.42881e+06	0.658626	350.779	0.464437	680926	0.0203134	0.135343		38616.1	40704.3	87502.6	990448	1631.65	96.9228	107.441	100	50.2616	0.985844	1216.72	184677	18689.7	12.3982	84.0451	0	830.968	68.5834	9.74888e+06
33	2005	2012	1	0	0	0.0539668	6.6197	9.90609	5.81495e+06	9.72839e+06	0.64412	352.609	0.520577	1.04701e+06	0.0229917	0.137909		66512.5	38117.4	81725.6	1.01182e+06	8046.35	96.9735	97.0273	100	178.147	0.990498	1327.14	193296	22440.9	13.7424	100.687	0	942.894	250.949	1.02473e+07
33	2006	2012	1	0	0	0.0681998	6.66303	10.5717	114.9	15694600	0.619417	354.67	0.454507	1188800	0.0256701	0.140474		95156.3	27300	83847	556601	32386	98.5	81.2	100	291.92	1.02529	1590.71	125145	26192	15.0866	117.329	0	1054.82	433.315	1.07457e+07
33	2007	2012	1	0	0	0.0710444	6.69825	10.7792	18812800	18812800	0.615134	357.38	0.50375	1.77916e+06	0.0283484	0.14304		120394	31962	72231	606959	29496	98.3	65.1	100	425.087	1.01384	1670.94	183481	30412.8	17.64	137.181	0	1122.56	695.321	1.00573e+07
33	2008	2012	1	0	0	0.0633195	6.72683	11.6303	112.7	22022300	0.613129	358.74	0.495428	2.14524e+06	0.0310267	0.145606		144817	32601	66656	440344	25392	98.55	86.2	100	582.584	0.960846	1654.6	204002	32895.3	18.04	155.831	0	1225.26	789.808	1.15538e+07
33	2009	2012	1	0	0	0.0748067	6.74001	11.8711	112.4	25199300	0.582703	359.82	0.998499	2.51132e+06	0.033705	0.148172		170477	35942	62255	1309736	24917	95.48	73	100	820.336	0.968013	1561.18	258199	37297.8	18.33	165.343	0	1359.67	949.419	9.79256e+06
33	2010	2012	1	0	0	0.0592064	6.78771	12.7841	112.7	30448900	0.567505	360.8	0.998642	2861788	0.0309423	0.144315		210355	37715	48000	1359084	19582	94.9	74.5	100	782.457	1.04617	1762.22	267000	40699.5	19.21	179.371	0	1550.07	1161.29	1.38831e+07
33	2011	2012	1	0	0	0.0548459	6.81245	13.2931	111	35809857	0.560276	362.9	0.996969	3508800	0.0346309	0.151783		233894	19324	43734	1824250	38482	93.5	0	100	1045.1	1.01253	1920.58	305238	43456	21.01	195.356	3.16007e+06	1703.94	1326.12	1.61522e+07
33	2012	2012	1	1	1	0.0525336	6.8405	13.8664	110.1	39698700	0.546063	364.8	0.997259	3789900	0.0483917	0.168996		276014	14630	35984	2198838	35837	98	0	100	1013.25	1.04406	2044.52	336073	47467.7	22.03	202.71	3.33032e+06	1788.39	1483.57	1.55986e+07
33	2013	2012	1	1	1	0.104329	6.86756	14.2389	109.6	43609347	0.53835	365.9	0.99836	4088800	0.0529119	0.159228		290284	12017	3582	2071449	35161	98.2	0	100	1077.62	1.02237	2262.92	353000	60596.5	26.32	248.087	3.46731e+06	1867.38	1636.17	1.50121e+07
33	2014	2012	1	1	1	0.0991179	6.93697	14.5162	108.7	49018700	0.508885	368.6	0.996473	4338800	0.0499033	0.15681		331005	11909	35308	2173108	115086	98.2	0	100	1168.6	1.01723	2236.46	240919	54822.7	27.14	255.784	3.53783e+06	1958.97	1915.91	1.43956e+07
33	2015	2012	1	1	1	0.0967968	6.96828	15.1511	108.5	52731500	0.497399	370.85	0.997034	4662800	0.0468753	0.163209		339897	12977	34420	0	97999	98.32	0	100	1241.58	1.0435	2560.35	172065	56835.7	27.6216	267.414	3.8933e+06	2018.18	2094.32	1.40129e+07
33	2016	2012	1	1	1	0.0987493	7.00143	16.1361	107.8	57738600	0.479043	375	0.994667	4802900	0.0472732	0.164708		360508	12178	31683	0	57542	98.1	0	100	1951.52	1.0488	2622.31	250020	63749.5	27.4528	281.533	3.99612e+06	2109.73	2311.35	1.44098e+07
33	2017	2012	1	1	1	0.0992966	7.02448	16.4281	0	6.13234e+07	0.470045	374.566	1.19426	5.43996e+06	0.0551317	0.168699		401270	7074.4	12401.6	1.26825e+06	85022.7	97.5811	0	100	1712.77	1.04635	2652.27	296729	67454.6	29.8723	300.393	5.18781e+06	2286.01	2439.34	1.62279e+07
33	2018	2012	1	1	1	0.103074	7.05821	16.9716	0	6.56229e+07	0.455539	376.395	1.2504	5.80604e+06	0.05781	0.171265		429166	4487.48	6624.64	1.28962e+06	91437.4	97.6317	0	100	1840.66	1.051	2762.7	305349	71205.8	31.2165	317.035	5.74223e+06	2397.94	2621.71	1.67263e+07
33	2019	2012	1	1	1	0.106852	7.09194	17.5151	0	6.99225e+07	0.441032	378.225	1.30654	6.17212e+06	0.0604884	0.173831		457062	1900.56	847.636	1.31099e+06	97852.1	97.6824	0	100	1968.54	1.05565	2873.13	313968	74956.9	32.5606	333.677	6.29666e+06	2509.86	2804.07	1.72247e+07
34	2000	2015	1	0	0	0.108595	5.69224	6.36754	1.64082e+06	0	0.595742	340.424	0	228889	0.021962	0.131232		9532.57	7154.04	74041.7	625656	0	0	35.8264	77.83	0	1.04227	0	2333.83	7460.17	8.4199	29.7932	0	222.594	0	64534.6
34	2001	2015	1	0	0	0.143262	5.72298	6.7886	1.51929e+06	219641	0.581586	340.44	0.0100041	271362	0.0207782	0.132634		13175.9	6708.18	72018.3	619369	3349.36	4.04545	33.6136	79.3482	0	1.03941	0	3040.36	9342.56	9.0337	31.1668	0	227.264	0	89259.9
34	2002	2015	1	0	0	0.177928	5.75372	7.20966	1.39776e+06	880465	0.567429	340.456	0.0892044	313834	0.0195943	0.134037		16819.2	6262.33	69994.9	613083	7711.26	8.674	31.4009	80.8664	0	1.03655	28.731	3746.9	11224.9	9.64751	32.5403	0	231.935	0	113985
34	2003	2015	1	0	0	0.212595	5.78447	7.63072	1.27622e+06	1.54129e+06	0.553272	340.472	0.168405	356307	0.0184105	0.135439		20462.5	5816.47	67971.5	606796	12073.2	13.3025	29.1882	82.3845	0	1.03369	66.6202	4453.44	13107.3	10.2613	33.9139	0	236.605	12.249	138711
34	2004	2015	1	0	0	0.247262	5.81521	8.05178	1.15469e+06	2.20211e+06	0.539115	340.488	0.247605	398779	0.0172267	0.136841		24105.8	5370.62	65948.1	600510	16435.1	17.9311	26.9755	83.9027	0	1.03082	104.509	5159.97	14989.7	10.8751	35.2875	0	241.275	35.231	163436
34	2005	2015	1	0	0	0.281929	5.84595	8.47284	1.03315e+06	2.86294e+06	0.524959	340.504	0.326805	441252	0.0160428	0.138244		27749.1	4924.76	63924.7	594223	20797	22.5596	24.7627	85.4209	28.2501	1.02796	142.399	5866.51	16872.1	11.4889	36.6611	0	245.945	58.2131	188161
34	2006	2015	1	0	0	0.382476	5.9439	8.62468	113.8	2540231	0.413348	340.08	0.273494	148900	0.014859	0.139646		13968.8	3860	63627	395333	26226	41.85	0	89	96.96	1.03889	185.421	2494	18754.5	12.1027	38.0347	0	250.616	81.1951	212886
34	2007	2015	1	0	0	0.402964	5.9113	9.2356	3342279	3342279	0.446103	340.16	0.273636	526196	0.0136752	0.141048		23000.8	4243	51977	422070	27745	36.8	0	89	100.883	1.05609	219.602	4130	19862.2	12.99	35.4956	0	149.132	103.076	266345
34	2008	2015	1	0	0	0.385515	5.94057	10.0921	113.4	4466114	0.482567	340.92	0.274845	568669	0.0124913	0.142451		35300.2	3348	64878	408764	32712	38.6	40.3	89	177.8	1.02087	247.776	5020	21808.5	13	36.1796	0	203.527	122.555	253139
34	2009	2015	1	0	0	0.319486	6.04499	10.4868	113.1	5180944	0.501395	342.6	0.997373	611141	0.0113075	0.143853		45541.7	4349	59982	634899	32128	26.9	36.45	90	196.434	0.974949	290.519	7332	25255.6	13.52	40.0474	0	247.029	148.641	294563
34	2010	2015	1	0	0	0.371038	5.99439	10.5861	114.2	6564084	0.506621	339.24	1.00486	662504	0.00668263	0.140468		54619.5	3823	41530	467571	45750	54.09	49.6	85	238.312	1.02153	347.08	11039	27564.1	14.29	55.1293	0	306.121	173.122	309258
34	2011	2015	1	0	0	0.454951	5.97462	10.722	112.2	8130202	0.51246	341	0.997361	869236	0.0104284	0.142079		57811.8	1482	47013	737062	50316	14.86	0	97.83	294.336	0.985386	415.574	14269	27429.4	15.21	43.8502	1.51383e+06	363.923	197.122	303560
34	2012	2015	1	0	0	0.58003	5.94248	11.4041	109.5	9206331	0.494866	340.6	1.00059	1070857	0.00984095	0.170471		73392.2	970	59262	1126473	50251	55.53	0	100	211.76	0.978991	430.977	18103	30881.5	16.01	50.7553	1.81932e+06	387.856	221.319	335723
34	2013	2015	1	0	0	0.585609	5.95851	11.8416	108.7	10028603	0.498574	339.5	1.00177	1124884	0.00723268	0.143063		84161.1	810	50542	977501	48209	57.96	0	100	362.579	1.0172	418.468	21020	32435.9	17.09	51.9236	1.90048e+06	414.87	236.058	340395
34	2014	2015	1	0	0	0.549519	6.08138	12.0489	105.8	9935232	0.423443	340.6	0.998532	1017021	0.0076067	0.137662		83500.3	727	45693	951872	85332	70.03	0	100	399.751	0.991192	340.298	25032	32952.7	17.5877	45.8125	1.85437e+06	344.033	289.483	469322
34	2015	2015	1	1	1	0.683855	6.16282	12.7621	103	8547329	0.31542	340.9	0.999619	547334	0.00265067	0.159841		50011	648	63451	0	62519	77.36	0	100	454.547	1.0169	500.83	1387	35256.6	18.0746	48.5273	1.55678e+06	208.236	300.458	499341
34	2016	2015	1	1	1	0.673785	6.3795	13.1872	97.5	7165334	0.245399	341	1	510204	0.00156342	0.152652		24391	486	21674	0	55464	79.66	0	100	540.871	1.0167	670.529	1337	37629.3	17.0141	48.1726	1.69223e+06	138.29	284.132	417111
34	2017	2015	1	1	1	0.697931	6.21486	13.5256	0	1.07928e+07	0.355077	340.696	1.27721	950921	0.00183688	0.155072		71468.8	0	39644.2	518785	73139.8	78.1022	0	103.639	530.701	0.993619	597.069	14344.9	39460.7	18.8546	53.144	2.41391e+06	301.988	333.998	484865
34	2018	2015	1	1	1	0.732598	6.2456	13.9466	0	1.14536e+07	0.34092	340.712	1.35641	993393	0.000653053	0.156474		75112.1	0	37620.8	512499	77501.7	82.7307	0	105.157	572.572	0.990758	634.959	15051.5	41343.1	19.4684	54.5176	2.66486e+06	306.658	356.98	509590
34	2019	2015	1	1	1	0.767265	6.27634	14.3677	0	1.21145e+07	0.326763	340.728	1.43561	1.03587e+06	0	0.157876		78755.4	0	35597.4	506212	81863.6	87.3593	0	106.675	614.443	0.987896	672.848	15758	43225.5	20.0822	55.8912	2.91581e+06	311.329	379.962	534315
35	2000	2015	1	0	0	0.358843	6.40165	2.15436	1.86662e+06	0	0.60528	237.885	0	0	0.0030012	0.156516		0	3956.05	11421.9	155208	7496.91	68.7105	55.6007	193.921	0	0.995538	0	12338	0	5.48892	4.63629	0	68.2309	0	1.99131e+06
35	2001	2015	1	0	0	0.351031	6.41699	2.57088	1.72836e+06	0	0.600016	240.13	0.0501987	0	0.0036851	0.162522		0	3875.27	11510.6	154109	7217.45	71.0836	51.7591	182.749	0	0.997401	0	12033.5	0	5.69686	7.17887	0	89.7335	13.244	1.98177e+06
35	2002	2015	1	0	0	0.343219	6.43234	2.98739	1.5901e+06	429495	0.594751	242.375	0.12523	0	0.00436901	0.168528		0	3794.5	11599.3	153010	6938	73.4567	47.9175	171.577	0	0.999265	0	11729.1	1278.43	5.90481	9.72145	0	111.236	32.9643	1.97224e+06
35	2003	2015	1	0	0	0.335407	6.44768	3.4039	1.45184e+06	1.09529e+06	0.589486	244.62	0.200262	0	0.00505291	0.174534		0	3713.73	11688.1	151911	6658.55	75.8298	44.0758	160.405	0	1.00113	0	11424.6	4117.45	6.11276	12.264	0	132.739	52.6846	1.9627e+06
35	2004	2015	1	0	0	0.327594	6.46303	3.82041	1.31358e+06	1.76108e+06	0.584222	246.865	0.275294	21296.9	0.00573681	0.18054		219.639	3632.95	11776.8	150811	6379.09	78.2029	40.2342	149.233	32.2564	1.00299	0	11120.1	6956.48	6.32071	14.8066	0	154.241	72.4048	1.95317e+06
35	2005	2015	1	0	0	0.319782	6.47837	4.23693	1.17532e+06	2.42688e+06	0.578957	249.11	0.350326	59142.3	0.00642071	0.186546		3487.26	3552.18	11865.5	149712	6099.64	80.576	36.3925	138.061	65.5691	1.00486	28.618	10815.7	9795.51	6.52865	17.3492	0	175.744	92.1251	1.94363e+06
35	2006	2015	1	0	0	0.339306	6.44013	4.39705	114.1	3300161	0.562094	251.71	0.294307	106500	0.00710461	0.192552		10800	1749	3934	100258	1214	59.61	27.02	100	95	1.00764	157.287	6810	12634.5	6.7366	19.8918	0	197.246	111.845	1.9341e+06
35	2007	2015	1	0	0	0.294047	6.52203	4.90132	3802248	3802248	0.573871	254.06	0.291073	134833	0.00778852	0.198558		12082.7	3308	18472	23590	4251	85.38	25.53	100	98.1	1.00823	177.572	8229	17387.2	7.18	23.6848	0	218.173	133.459	1.65235e+06
35	2008	2015	1	0	0	0.301821	6.52644	5.76889	110.4	4427597	0.567712	256.13	0.289697	172679	0.00847242	0.204564		12831.3	4083	10416	23750	7029	99.64	30.39	100	135.8	1.02156	181.084	9187	18804.9	7.09	23.0016	0	237.351	148.757	1.46313e+06
35	2009	2015	1	0	0	0.286374	6.57374	6.46455	109.7	4801815	0.549521	257.89	0.996588	210524	0.00915632	0.21057		16297.6	3922	10231	345693	9644	99.73	30.36	100	185.6	0.97399	188.601	10119	20243.3	7.31	23.369	0	250.916	171.874	1.81075e+06
35	2010	2015	1	0	0	0.274517	6.57694	6.54452	112.4	5592431	0.55342	260.89	0.99425	232514	0.00791899	0.201815		18277.8	4237	13338	498262	7448	99.41	33.47	100	246.1	1.05668	187.058	11233	22577.7	7.39	32.425	0	284.747	192.903	2.3823e+06
35	2011	2015	1	0	0	0.253554	6.59794	6.5723	110	6472168	0.550854	260.1	1	272716	0.0113521	0.206129		19996.5	3148	16800	4190	4190	99.79	0	100.6	298	1.02783	175.897	12591	27032.8	7.61	33.2355	554640	308.247	216.898	2.3586e+06
35	2012	2015	1	0	0	0.262241	6.594	6.62536	108.2	7066543	0.555062	264.8	0.996224	319337	0.0190972	0.252903		22415.7	2994	17300	0	3328	99.88	0	90.37	350	1.00889	175.252	14208	28488.3	7.71	34.2395	662393	330.914	228.53	2.27363e+06
35	2013	2015	1	0	0	0.236508	6.57563	7.38355	108.5	7803423	0.535463	267.2	0.995509	370665	0.00669397	0.260888		25362.8	2982	13444	0	3225	99.86	0	90.36	408	1.00929	467.691	10106	31595.4	8.64	43.6905	710091	361.664	240.203	2.01297e+06
35	2014	2015	1	0	0	0.246146	6.58948	7.80776	107.8	8502208	0.54253	268.8	0.997024	412647	0.00513364	0.24229		31301.4	2796	12578	578546	4511	99.8	0	0	387	0.974436	613.115	10920	35057	8.5843	45.4558	854840	379.201	262.944	1.7101e+06
35	2015	2015	1	1	1	0.245002	6.62591	8.7821	108	9101099	0.523859	272.8	0.9875	471928	0.0195688	0.237923		39195	2544	12868	0	2214	99.9	0	0	352	1.04447	526.053	2044	38883.3	8.6297	34.2274	1.18406e+06	388.48	290.064	1.56937e+06
35	2016	2015	1	1	1	0.26248	6.65262	8.84862	107.5	9768303	0.506688	274	0.963504	444022	0.0134788	0.240212		45462.1	1980	6994	0	1598	99.96	0	0	364.3	1.04336	532.42	3430	42422.1	8.6591	45.4304	1.15372e+06	395.416	317.439	1.58338e+06
35	2017	2015	1	1	1	0.226035	6.66251	9.23508	0	1.04164e+07	0.515783	276.05	1.25071	513288	0.0146275	0.258618		42698.7	2582.91	12930	136522	2746.18	109.053	0	3.99855	465.322	1.02722	586.297	7161.98	43863.9	9.02402	47.8601	1.35145e+06	433.775	328.769	1.82922e+06
35	2018	2015	1	1	1	0.218223	6.67786	9.65159	0	1.10822e+07	0.510519	278.295	1.32574	551133	0.0153114	0.264624		45966.3	2502.14	13018.7	135423	2466.73	111.426	0	0	498.635	1.02908	632.77	6857.51	46702.9	9.23197	50.4027	1.50408e+06	455.278	348.489	1.81968e+06
35	2019	2015	1	1	1	0.210411	6.6932	10.0681	0	1.1748e+07	0.505254	280.54	1.40077	588979	0.0159953	0.27063		49234	2421.36	13107.4	134324	2187.27	113.799	0	0	531.947	1.03094	679.243	6553.04	49541.9	9.43991	52.9453	1.65671e+06	476.78	368.209	1.81015e+06
36	2000	2015	1	0	0	0.501666	6.07655	5.99134	4.78872e+06	0	0.462348	424.18	0.189486	0	0.0182867	0.262453		0	6343.78	82653.5	2.00724e+06	66863.3	118.785	47.5015	0	0	1.05104	212.969	0	4212.42	11.2757	14.0171	0	0	0	0
36	2001	2015	1	0	0	0.487325	6.10201	6.51271	4.43401e+06	0	0.469045	431.771	0.24516	0	0.0178933	0.257018		0	6468.27	79125.4	1.99296e+06	63839.5	113.305	44.4091	0	0	1.04738	217.739	0	6533.11	11.9497	19.0395	0	0	0	0
36	2002	2015	1	0	0	0.472983	6.12746	7.03408	4.07929e+06	0	0.475743	439.362	0.300835	0	0.0174999	0.251583		0	6592.76	75597.2	1.97869e+06	60815.8	107.826	41.3166	0	0	1.04372	222.509	0	8853.8	12.6237	24.0619	0	0	0	0
36	2003	2015	1	0	0	0.458642	6.15292	7.55545	3.72458e+06	0	0.48244	446.953	0.35651	0	0.0171064	0.246148		0	6717.25	72069.1	1.96442e+06	57792	102.346	38.2242	0	0	1.04005	227.278	0	11174.5	13.2977	29.0843	0	23.5809	7.42804	0
36	2004	2015	1	0	0	0.4443	6.17837	8.07683	3.36987e+06	912599	0.489137	454.544	0.412185	0	0.016713	0.240713		0	6841.75	68541	1.95014e+06	54768.3	96.866	35.1317	1.17664	0	1.03639	232.048	0	13495.2	13.9716	34.1067	0	97.1772	54.4977	0
36	2005	2015	1	0	0	0.429959	6.20383	8.5982	3.01516e+06	2.66453e+06	0.495835	462.136	0.46786	0	0.0163196	0.235278		0	6966.24	65012.9	1.93587e+06	51744.5	91.3862	32.0393	10.4949	0	1.03273	236.818	319.545	15815.9	14.6456	39.129	0	170.774	101.567	0
36	2006	2015	1	0	0	0.324046	6.24456	9.14563	113.307	5462338	0.4916	463.02	0.388061	301000	0.0159262	0.229843		21984.9	7033	59664	1046115	43299	75.65	14.98	23.68	130.647	1.02037	196.201	26755	18136.6	15.3196	44.1514	0	244.37	148.637	76821.4
36	2007	2015	1	0	0	0.353129	6.24198	9.30892	9.75467e+06	6505242	0.5041	466.39	0.400202	219022	0.0155328	0.224408		24882.5	6192	67881	1493462	50758	74.49	16.08	35.98	131.259	0.981163	256.239	33114	21145.3	16.26	54.1145	0	327.929	222.154	357548
36	2008	2015	1	0	0	0.405249	6.22238	9.85995	112.221	7340633	0.4879	471	0.412951	456829	0.0151393	0.218973		29988.2	6234	47897	1389693	43155	74.98	28.21	28.55	134.406	1.05541	266.417	39008	22418.9	16.82	54.9125	0	338.196	241.222	370700
36	2009	2015	1	0	0	0.52389	6.3829	10.7224	111.902	8432283	0.4979	473.86	0.996982	694636	0.0147459	0.213538		59703.4	6526	45340	1873713	36467	74.24	27.26	37.78	164.571	1.02579	263.752	46493	25123.1	17.2	57.0636	0	399.247	299.095	357274
36	2010	2015	1	0	0	0.410744	6.34946	11.5002	113.432	10817632	0.5495	502.07	0.958432	627107	0.0144452	0.197012		81132.5	6768	40587	1924006	33928	70.87	61.8	51.46	230.73	1.04866	266.976	52897	27492.9	17.85	62.9263	0	547.21	331.911	610713
36	2011	2015	1	0	0	0.363583	6.33174	12.3245	112.374	13463756	0.5768	604.2	0.994538	950110	0.0135312	0.191216		81155.9	10879	45823	3076036	45389	71	0	53	298.5	0.982421	267.338	65803	30417	18.21	65.2296	1.92041e+06	678.274	366.536	870990
36	2012	2015	1	0	0	0.303567	6.3676	12.5309	110.769	15172679	0.5793	509.8	0.906042	1196762	0.0140841	0.226213		109840	10099	47044	3086522	24511	49.08	0	100	378.399	1.00816	285.473	75042	32302.7	19.25	72.2	2.1166e+06	748.225	409.696	1.49387e+06
36	2013	2015	1	0	0	0.28768	6.39716	12.6513	109.596	16855232	0.5742	512.1	0.997657	1465411	0.0131685	0.199498		147406	9014	39244	3000370	24356	47.97	0	100	454	1.03447	303.979	101808	33847.5	20.31	78.53	2.51054e+06	803.003	456.461	1.95262e+06
36	2014	2015	1	0	0	0.273533	6.42777	12.9962	108.165	18725768	0.5678	518.8	0.991519	2403763	0.0126859	0.183243		181456	8898	38256	3462492	33954	48.5	0	100	504.5	0.99488	287.356	117706	33183.8	20.9711	85.1061	2.85979e+06	864.876	512.863	2.27851e+06
36	2015	2015	1	1	1	0.257989	6.45481	13.7366	107.591	20120654	0.5465	528.27	0.892366	2202690	0.0120921	0.171962		216898	8682	36337	0	20865	56.8	0	100	619.8	1.00625	261.466	135413	39376.6	21.2662	91.4259	3.03886e+06	882.091	574.287	1.40899e+06
36	2016	2015	1	1	1	0.279593	6.50173	14.2142	107.104	22041285	0.5206	535	0.882243	2355419	0.0121987	0.173445		232736	4520	14212	0	12939	0	0	100	717.92	0.960662	264.6	151975	43696.1	22.1275	96.2375	3.17785e+06	902.447	660.974	1.41569e+06
36	2017	2015	1	1	1	0.25786	6.50928	14.8547	0	2.36877e+07	0.576202	553.23	1.13596	2.59709e+06	0.0115986	0.170059		243217	8460.13	22675.3	1.76457e+06	15459.3	25.6284	0	122.314	709.194	0.988771	294.055	153501	43664.2	22.7334	99.3978	3.95905e+06	1053.93	666.403	2.14656e+06
36	2018	2015	1	1	1	0.243519	6.53473	15.376	0	2.54397e+07	0.582899	560.821	1.19163	2.8349e+06	0.0112051	0.164624		265765	8584.62	19147.2	1.7503e+06	12435.6	20.1485	0	131.632	770.352	0.985108	298.824	166266	45984.9	23.4073	104.42	4.39481e+06	1127.53	713.473	2.33472e+06
36	2019	2015	1	1	1	0.229177	6.56019	15.8974	0	2.71916e+07	0.589596	568.412	1.24731	3.07271e+06	0.0108117	0.159189		288314	8709.11	15619.1	1.73602e+06	9411.8	14.6687	0	140.951	831.509	0.981445	303.594	179031	48305.6	24.0813	109.443	4.83056e+06	1201.12	760.542	2.52287e+06
37	2000	2012	1	0	0	0.271065	6.63345	5.41291	1.63187e+07	0	0.556251	949.136	0.335356	0	0	0.118048		0	34083.4	160225	2.06819e+06	69112.1	138.946	153.023	113.207	0	1.09609	784.41	0	0	0	0	0	0	0	0
37	2001	2012	1	0	0	0.258009	6.65787	5.87625	1.51099e+07	0	0.546615	970.22	0.383326	0	0	0.120141		0	32406	151735	2010855	65383.3	134.429	142.443	109.869	0	1.08971	908.797	0	2802.47	0	0	0	0	0	0
37	2002	2012	1	0	0	0.244952	6.68229	6.33959	1.39011e+07	0	0.53698	991.304	0.431296	0	0	0.122235		0	30728.6	143245	1.95352e+06	61654.5	129.912	131.862	106.531	0	1.08334	1033.18	0	6495.81	0	0	0	0	0	659338
37	2003	2012	1	0	0	0.231896	6.70671	6.80293	1.26924e+07	0	0.527344	1012.39	0.479266	0	0	0.124328		2515.03	29051.2	134755	1.89619e+06	57925.7	125.395	121.281	103.194	0	1.07696	1157.57	0	10189.1	0	0	0	220.573	0	2.55305e+06
37	2004	2012	1	0	0	0.21884	6.73113	7.26627	1.14836e+07	1.8769e+06	0.517709	1033.47	0.527236	0	0	0.126422		64626	27373.7	126265	1.83886e+06	54196.9	120.878	110.701	99.8562	0	1.07058	1281.96	9269.7	13882.5	0	51.5867	0	528.732	195.955	4.44677e+06
37	2005	2012	1	0	0	0.205783	6.75555	7.72962	1.02748e+07	1.163e+07	0.508073	1054.56	0.575206	536338	0.00207735	0.128516		126737	25696.3	117775	1.78152e+06	50468.1	116.361	100.12	96.5185	50.849	1.06421	1406.34	87848.7	17575.8	0	111.657	0	836.891	597.089	6.34049e+06
37	2006	2012	1	0	0	0.177441	6.81481	8.3854	113.3	27504776	0.447798	1103.4	0.517945	1867700	0.00436189	0.130609		189791	23599	87264	838800	55000	97.24	67.55	65.23	1433.3	1.05721	1394.52	184628	21269.2	0	171.727	0	1145.05	998.224	8.2342e+06
37	2007	2012	1	0	0	0.177868	6.79018	8.46	33241677	33241677	0.456297	1112.28	0.535441	2.64265e+06	0.00664643	0.132703		239005	24247	119236	1255870	38014	97.88	81.19	96.05	1466.5	1.05983	1537.17	113774	26606.7	73.05	286.767	0	1504.19	1584.96	7.2356e+06
37	2008	2012	1	0	0	0.179075	6.76968	9.01651	111	39009857	0.48475	1124.96	0.54409	3.69581e+06	0.00893097	0.134797		299388	21005	107062	2166739	35882	98.26	84.17	96.51	1173.1	1.05134	1673.07	224521	29093.4	76.12	322.959	0	1715.48	1713.27	1.01499e+07
37	2009	2012	1	0	0	0.150807	6.86729	9.57184	114.5	45026032	0.487658	1139.63	0.993559	4.74896e+06	0.0112155	0.13689		401245	24553	93045	1398631	36670	99	78.78	83.63	1230	1.02734	2077.71	279700	32517.7	79.95	368.49	0	1903.65	2123.31	1.16033e+07
37	2010	2012	1	0	0	0.145176	6.90568	9.94754	115.1	55513336	0.490613	1149.07	0.995892	5269400	0.0137606	0.125717		425537	12558	61928	727269	28901	99.57	91.3	100	1655.4	1.05767	2197.21	485575	35536.7	80.91	387.48	0	2283.82	2563.87	1.5383e+07
37	2011	2012	1	0	0	0.146083	6.90019	10.6045	115	68545786	0.496985	1163.3	0.993897	6806929	0.0171366	0.137361		499565	12904	52577	2009837	22227	98.76	0	100	1887.12	1.03259	2318.69	655299	37000.1	89.03	355.986	7.49264e+06	2745.55	2955.08	2.14144e+07
37	2012	2012	1	1	1	0.129149	6.91841	10.9965	112.6	81389438	0.488997	1173.3	0.995739	7808952	0.0193996	0.164959		589010	11780	56730	3484497	24723	98.65	0	0	1890	0.977872	2419.72	859000	41118.2	97.06	445.983	8.37518e+06	3205.78	3426.8	2.55856e+07
37	2013	2012	1	1	1	0.0617482	6.94724	11.7295	110	91088904	0.446587	1188	0.993855	8985395	0.0177316	0.154095		650108	10524	52040	2342401	21452	99	0	100	2572	1.01693	2577.76	1121599	48573.2	324.35	743.727	1.16106e+06	3469.7	3795.43	2.6055e+07
37	2014	2012	1	1	1	0.110947	6.98712	12.0113	108.5	100600000	0.416863	1210.7	0.990667	10251696	0.0189246	0.136608		662037	10064	50754	1588784	25574	97.44	0	100	2880	0.983467	2186.3	876000	51409.7	151.528	500.227	1.09e+07	3667.23	4222.68	2.79425e+07
37	2015	2012	1	1	1	0.0570126	7.01515	12.0303	107.9	108011633	0.389859	1228.05	0.992948	11576393	0.0265707	0.155501		700697	11454	37224	0	20607	96.06	0	100	4740	0.977809	2444.26	752000	55450.3	342.141	774.957	1.17797e+07	3789.06	4575.81	1.96976e+07
37	2016	2012	1	1	1	0.0665917	7.00709	12.8529	107.8	121702335	0.346449	1399	0.939242	11754109	0.028952	0.142615		837050	9262	17318	0	0	0	0	0	5994	1.04339	2852.89	600453	58519.5	365.091	834.568	1.25512e+07	4114.79	5083.42	2.14296e+07
37	2017	2012	1	1	1	0.0491073	7.0486	13.2897	0	1.28667e+08	0.392446	1307.57	1.15084	1.31742e+07	0.0294918	0.15364		872069	5567.31	15893.8	1.09353e+06	5722.76	62.1585	0	56.4669	4843.95	0.98769	2898.98	1.0308e+06	61895.9	354.148	832.502	1.37021e+07	4534.8	5410.7	2.90651e+07
37	2018	2012	1	1	1	0.036051	7.07302	13.7531	0	1.3842e+08	0.38281	1328.65	1.19881	1.42274e+07	0.0317764	0.155733		934180	3889.89	7403.73	1.0362e+06	1993.98	57.6416	0	53.1293	5243.38	0.981313	3023.37	1.10938e+06	65589.3	388.008	892.572	1.52432e+07	4842.96	5811.84	3.09588e+07
37	2019	2012	1	1	1	0.0229947	7.09744	14.2164	0	1.48173e+08	0.373175	1349.74	1.24678	1.52805e+07	0.0340609	0.157827		996291	2212.47	0	978870	0	53.1247	0	49.7916	5642.81	0.974937	3147.76	1.18795e+06	69282.6	421.867	952.642	1.67843e+07	5151.12	6212.97	3.28525e+07
38	2000	2012	1	0	0	0.28607	6.05064	4.39827	2.71744e+06	0	0.621746	353.707	0	0	0.00683975	0.210184		0	12640.8	98203.5	989028	6284.25	38.7509	62.5788	0	0	1.01488	438.57	0	2845.64	11.1964	16.8722	0	202.18	0	150479
38	2001	2012	1	0	0	0.2953	6.06267	4.80952	2.51616e+06	0	0.61259	355.603	0	0	0.00684552	0.209309		0	11856.2	95916.4	977633	9129.36	36.9591	58.7545	0	0	1.01477	438.28	0	5266.2	11.7876	19.1875	0	225.324	0	154014
38	2002	2012	1	0	0	0.304529	6.0747	5.22077	2.31487e+06	652347	0.603435	357.499	0.0590725	16973	0.00685129	0.208434		0	11071.6	93629.2	966237	11974.5	35.1673	54.9303	0	0	1.01467	437.989	0	7686.75	12.3789	21.5028	0	248.468	14.916	157549
38	2003	2012	1	0	0	0.313758	6.08672	5.63201	2.11359e+06	1.69538e+06	0.594279	359.395	0.140422	92130.9	0.00685706	0.207559		0	10287	91342.1	954842	14819.6	33.3755	51.106	7.57455	0	1.01456	437.699	0	10107.3	12.9702	23.8181	0	271.612	44.5062	161083
38	2004	2012	1	0	0	0.322987	6.09875	6.04326	1.91231e+06	2.73842e+06	0.585124	361.291	0.221772	167289	0.00686283	0.206684		0	9502.41	89055	943446	17664.7	31.5836	47.2817	15.8273	13.5557	1.01446	437.408	0	12527.9	13.5615	26.1334	0	294.757	74.0964	164618
38	2005	2012	1	0	0	0.332216	6.11078	6.45451	1.71102e+06	3.78145e+06	0.575969	363.187	0.303122	242447	0.00686861	0.205809		0	8717.82	86767.8	932051	20509.8	29.7918	43.4575	24.08	57.4768	1.01435	437.118	0	14948.4	14.1528	28.4487	0	317.901	103.687	168152
38	2006	2012	1	0	0	0.334489	6.09969	6.48207	113.2	4279969	0.524537	363.71	0.265349	244500	0.00687438	0.204933		23051.3	7057	66727	608842	25172	29.64	0	0	106.477	0.968156	339.996	1144	17369	14.7441	30.764	0	341.045	133.277	171687
38	2007	2012	1	0	0	0.362679	6.10001	6.84781	5535406	5535406	0.563283	366.89	0.265747	392763	0.00688015	0.204058		30028	7592	86825	718280	30564	34.92	0	0	150.897	1.04023	445.562	1110	18962.8	15.16	34.7638	0	311.754	150.01	189796
38	2008	2012	1	0	0	0.425754	6.12134	7.79448	110.1	7149413	0.601728	369.38	0.265445	467921	0.00688592	0.203183		39036.6	7985	83896	644236	29169	34.32	56.04	61.08	182.804	1.03671	462.397	5574	22860.5	16.38	35.9749	0	406.214	167.63	282343
38	2009	2012	1	0	0	0.30784	6.24751	8.57568	110	7601136	0.516094	371.91	0.92076	543079	0.00689169	0.202308		56720.2	6098	76352	899685	30675	30.64	82.96	90.52	202.39	1.03488	485.175	6697	25414.1	16.73	37.9368	0	373.05	242.002	150315
38	2010	2012	1	0	0	0.335163	6.21928	8.89971	112.2	8889619	0.510371	372.96	0.998579	548354	0.00663736	0.191934		75128.7	6290	71294	1023200	21383	12.2	86.63	99.05	254.913	1.04434	499.37	6994	27584.7	17.05	38.9779	0	417.684	272.346	198750
38	2011	2012	1	0	0	0.409954	6.19201	9.25957	111.3	11042013	0.548297	374.3	0.99813	711003	0.00712213	0.201695		82957.5	1715	87360	1779173	47499	0	0	100	339.857	0.979754	447.824	5695	29815.2	17.19	40.0877	1.68006e+06	528.786	291.059	106203
38	2012	2012	1	1	1	0.393315	6.18928	9.32782	109.6	11819213	0.529134	376.9	0.996551	825133	0.0066604	0.21824		102213	1421	83407	0	28127	4.74	0	100	410	1.00258	408.216	13043	29458.8	17.55	42.0607	2.00726e+06	532.345	316.127	81902.2
38	2013	2012	1	1	1	0.394539	6.17686	9.78344	108.2	12720917	0.510794	378.1	0.998413	1025005	0.00818325	0.201849		122692	1638	72424	2062026	32032	5.49	0	85.86	441.7	0.97724	443.012	4137	35115.3	19.24	48.0657	2.17177e+06	539.124	341.755	131449
38	2014	2012	1	1	1	0.426665	6.18184	9.88414	106.5	13425500	0.500838	380.7	0.996585	1075605	0.00655079	0.182947		142715	1560	71938	1765018	76895	6	0	88.41	460	1.02303	428.075	14940	36207.9	19.7906	50.3933	2.06871e+06	545.815	362.566	322484
38	2015	2012	1	1	1	0.461422	6.21157	10.5104	106.8	13587278	0.468379	382.35	0.997882	972646	0.00532105	0.194978		153515	1373	55393	0	50907	24	0	89.02	408	1.03206	418.744	15959	39364.6	20.7037	52.6427	2.34671e+06	510.541	390.426	199559
38	2016	2012	1	1	1	0.411678	6.27302	10.7769	106.8	14385741	0.457941	383	1	821331	0.00792848	0.200008		163278	1384	47879	0	40963	27.5	0	95.62	574	1.01201	410.749	20006	42035.9	20.167	54.0785	2.38892e+06	518.064	426.308	248468
38	2017	2012	1	1	1	0.442965	6.25511	11.3895	0	1.62979e+07	0.466103	385.94	1.27932	1.14434e+06	0.00693787	0.195307		180947	0	59322.2	795305	54651.3	8.29	0	123.113	584.53	1.0131	433.631	18630.8	43995	21.2482	56.2324	3.10346e+06	595.631	458.769	210567
38	2018	2012	1	1	1	0.452194	6.26714	11.8008	0	1.73409e+07	0.456948	387.836	1.36067	1.2195e+06	0.00694364	0.194432		196085	0	57035	783910	57496.4	6.49818	0	131.365	628.451	1.01299	433.341	20292	46415.6	21.8395	58.5477	3.43748e+06	618.775	488.359	214101
38	2019	2012	1	1	1	0.461424	6.27917	12.212	0	1.83839e+07	0.447792	389.732	1.44202	1.29466e+06	0.00694941	0.193556		211223	0	54747.9	772514	60341.5	4.70636	0	139.618	672.372	1.01289	433.05	21953.2	48836.1	22.4308	60.863	3.7715e+06	641.919	517.949	217636
39	2000	2015	1	0	0	0.484734	5.9577	3.43522	775743	0	0.351814	155.405	0	0	0.0158611	0.200492		0	1641.06	37860.3	750823	49687.2	79.5486	71.0443	46.4218	0	0.9728	38.895	0	2194.4	2.77282	28.8817	0	0	0	0
39	2001	2015	1	0	0	0.472622	5.99054	4.09551	718289	0	0.360378	155.854	0	0	0.0156295	0.196183		0	1640.27	36205.2	728141	47030	80.1564	66.2364	49.0155	0	0.976805	48.7048	0	4754.66	3.0369	28.7164	0	0	0	0
39	2002	2015	1	0	0	0.46051	6.02337	4.7558	660834	0	0.368943	156.303	0	0	0.0153978	0.191874		0	1639.48	34550.1	705458	44372.8	80.7641	61.4285	51.6091	0	0.98081	58.5145	0	7314.92	3.30097	28.5511	0	0	0	0
39	2003	2015	1	0	0	0.448398	6.05621	5.41609	603380	0	0.377507	156.752	0.05111	0	0.0151662	0.187565		0	1638.69	32894.9	682775	41715.6	81.3718	56.6205	54.2027	0	0.984815	68.3242	0	9875.19	3.56505	28.3858	0	1.13713	0	0
39	2004	2015	1	0	0	0.436286	6.08904	6.07638	545926	158169	0.386072	157.201	0.141441	0	0.0149346	0.183256		0	1637.9	31239.8	660092	39058.3	81.9795	51.8126	56.7964	0	0.98882	78.1339	0	12435.5	3.82913	28.2205	0	18.4952	13.8791	0
39	2005	2015	1	0	0	0.424174	6.12188	6.73667	488472	645968	0.394636	157.65	0.231772	0	0.014703	0.178947		2277.04	1637.11	29584.7	637410	36401.1	82.5873	47.0047	59.39	0	0.992825	87.9437	706.855	14995.7	4.0932	28.0552	0	35.8533	28.9665	0
39	2006	2015	1	0	0	0.408928	6.16121	7.74463	112.9	1300900	0.380506	157.09	0.170348	91300	0.0144714	0.174638		9104.21	1506	25550	166142	31585	97.11	21.86	66.67	28.69	0.989492	75.9649	5531	17556	4.35728	27.8899	0	53.2114	44.0539	23202.4
39	2007	2015	1	0	0	0.381119	6.19999	8.1763	1580091	1580091	0.377193	158.02	0.173712	136273	0.0142397	0.170329		13985.5	2307	27931	936370	35193	74.57	38.69	100	43.567	0.965189	87.5572	8131	18467.6	4.73	20.9254	0	59.4904	64.7521	50437.3
39	2008	2015	1	0	0	0.393827	6.17891	8.63968	112.7	1924000	0.408264	158.93	0.174857	215661	0.0140081	0.16602		17939	1132	26085	427700	35109	82.59	46.04	64.92	45.118	0.990109	119.892	10608	22106.7	4.99	51.3937	0	74.1803	70.4922	70828.2
39	2009	2015	1	0	0	0.358967	6.3341	9.14534	112.9	2455896	0.432795	159.88	0.996998	295049	0.0137765	0.161712		25745.8	1306	23537	449215	33916	84.93	33.55	47.84	69.486	1.04647	116.156	11932	26242.7	5.27	14.8564	0	99.1852	95.4019	127826
39	2010	2015	1	0	0	0.370181	6.32604	9.73157	114.6	3008439	0.466122	160.46	0.99838	312066	0.0149988	0.141896		35687.9	1485	21847	439507	16106	86.22	59.59	48.38	112.433	1.00742	129.77	16167	28807.7	5.23	24.5214	0	129.085	105.794	133067
39	2011	2015	1	0	0	0.353459	6.27394	10.4824	113.5	3724882	0.495452	161.4	0.996902	409908	0.01152	0.162547		28980	1572	16561	697975	13865	74.33	0	66.33	129.2	1.02346	155.652	18077	32753.6	5.44	24.4166	769536	161.169	114.972	145276
39	2012	2015	1	0	0	0.387919	6.29678	11.2495	112.1	4174466	0.489225	161.9	0.998765	523746	0.0125388	0.164884		37473.8	1459	16017	811911	13624	81.29	0	70.22	143.59	1.0597	200.428	21017	32381.7	5.49	21.9512	959570	173.842	128.604	185218
39	2013	2015	1	0	0	0.351097	6.31494	12.1102	110.4	4622452	0.486214	161.9	1	651393	0.013688	0.146104		46147.6	2174	15883	866657	0	100	0	73.46	178.5	1.04852	231.574	26208	34846.7	6.55	30.385	1.08421e+06	187.159	140.446	210770
39	2014	2015	1	0	0	0.29771	6.4167	12.8713	109.2	5171690	0.471413	160.6	1.00436	684360	0.0122998	0.129439		53803.9	2648	19881	718966	16098	85.22	0	100	195.7	1.04327	248.454	30260	37562.9	6.6712	32.706	1.12922e+06	198.308	166.589	205830
39	2015	2015	1	1	1	0.293444	6.45351	13.7396	108.7	5447404	0.461321	161.61	0.99703	957790	0.012924	0.133806		60050	1422	17345	0	13950	93.97	0	92.92	236.1	1.02592	124.926	34703	39895.7	6.7378	10.7161	1.18381e+06	201.627	178.772	259708
39	2016	2015	1	1	1	0.269875	6.55159	13.7918	108.7	5890196	0.437744	162	1	714530	0.0119807	0.132654		65258.7	945	5556	0	15590	88.34	0	93.73	282	0.985853	124.448	36132	43309.2	6.988	37.936	1.17182e+06	202.762	204.523	323253
39	2017	2015	1	1	1	0.278831	6.51589	14.6601	0	6.49956e+06	0.497409	163.039	1.31575	930153	0.0119235	0.12724		69391.4	1627.62	9723.15	365216	4514.51	89.88	0	90.5136	282.45	1.04088	205.66	39068.8	45718.9	7.26212	26.0716	1.56055e+06	244.15	210.015	319240
39	2018	2015	1	1	1	0.266719	6.54872	15.3204	0	6.98736e+06	0.505974	163.488	1.40608	1.00954e+06	0.0116919	0.122931		74984.3	1626.83	8068.02	342534	1857.29	90.4877	0	93.1073	307.338	1.04489	215.47	42265.6	48279.2	7.5262	25.9063	1.72977e+06	261.508	225.103	346153
39	2019	2015	1	1	1	0.254607	6.58156	15.9807	0	7.47516e+06	0.514538	163.937	1.49641	1.08893e+06	0.0114603	0.118622		80577.1	1626.04	6412.89	319851	0	91.0955	0	95.7009	332.225	1.04889	225.28	45462.4	50839.4	7.79027	25.741	1.89899e+06	278.866	240.19	373066
40	2000	2013	1	0	0	0.194674	5.87051	6.21525	2.8971e+06	0	0.457645	444.885	0	0	0.00314141	0.259809		0	1417.97	268894	3.57463e+06	313363	38.667	93.4808	45.1683	0	1.01079	126.536	0	0	14.2644	27.0855	0	0	0	340573
40	2001	2013	1	0	0	0.192537	5.89933	6.69202	2.68251e+06	0	0.460902	446.203	0	0	0.00317831	0.255446		0	1530.91	256717	3.46004e+06	314518	37.9455	87.1455	48.3209	0	1.00855	160.807	0	0	14.7147	29.7773	0	40.7285	0	353754
40	2002	2013	1	0	0	0.1904	5.92815	7.16878	2.46792e+06	0	0.464159	447.521	0.035409	0	0.00321521	0.251084		0	1643.85	244539	3.34545e+06	315673	37.2239	80.8101	51.4735	0	1.00631	195.078	108.152	2216.5	15.165	32.4691	0	91.9008	0	366934
40	2003	2013	1	0	0	0.188264	5.95697	7.64555	2.25333e+06	0	0.467416	448.839	0.116002	0	0.00325211	0.246721		0	1756.78	232361	3.23086e+06	316828	36.5024	74.4747	54.6262	0	1.00407	229.348	570.067	5608.36	15.6153	35.1609	0	143.073	6.3951	380115
40	2004	2013	1	0	0	0.186127	5.98579	8.12231	2.03873e+06	1.40212e+06	0.470674	450.157	0.196594	35363.7	0.00328901	0.242358		11919.5	1869.72	220183	3.11627e+06	317983	35.7808	68.1394	57.7788	0	1.00183	263.619	1031.98	9000.23	16.0656	37.8528	0	194.245	51.7243	393295
40	2005	2013	1	0	0	0.18399	6.01461	8.59908	1.82414e+06	3.01289e+06	0.473931	451.475	0.277187	126829	0.00332591	0.237995		23939.3	1982.65	208005	3.00168e+06	319138	35.0593	61.804	60.9315	0	0.99959	297.889	1493.9	12392.1	16.5158	40.5446	0	245.418	97.0534	406476
40	2006	2013	1	0	0	0.188988	6.03615	9.30344	118	4280089	0.411907	450.21	0.226339	245900	0.00336281	0.233632		31327.5	2180	192117	1868651	40967	25.44	47.5	77.04	50.65	0.984886	286.702	2511	15784	16.9661	43.2364	0	296.59	142.383	419656
40	2007	2013	1	0	0	0.170475	6.04459	9.98965	5901361	5901361	0.474636	452.77	0.234092	309759	0.00339972	0.229269		42330	1998	200917	2324354	37261	23.79	38.71	81.47	70.273	1.01021	355.958	2743	18263.2	17.79	47.6981	0	280.079	188.607	315475
40	2008	2013	1	0	0	0.182529	6.07652	10.183	117.8	7523927	0.498689	456.49	0.234813	401225	0.00343662	0.224906		51717.1	1913	198574	2549928	35340	37.82	35.33	83	106.7	0.987946	383.016	3224	20873.1	18.11	49.5923	0	354.314	220.602	298252
40	2009	2013	1	0	0	0.148949	6.21531	10.3183	116.9	9128888	0.494463	459.19	0.99706	492690	0.00347352	0.220543		65502.6	2612	185212	2467806	10660	64.55	58.39	25.22	125.5	1.02235	454.294	5038	26067	18	52.7516	0	429.278	297.239	331551
40	2010	2013	1	0	0	0.171353	6.18436	10.3942	115	10862293	0.512396	457.74	0.946957	563258	0.00362718	0.211982		83550.9	2723	47524	2482606	10836	38.37	81.78	60.2	189.6	0.984328	502.337	5707.3	28834.7	18.35	51.6776	0	512.372	324.282	663683
40	2011	2013	1	0	0	0.191693	6.17943	10.8397	114.3	13471906	0.536327	459.9	0.93716	617762	0.00291595	0.214471		109316	2924	128439	3630389	3257261	17.17	0	90.41	230	0.978886	534.382	3675	33467.4	18.69	52.7735	2.37734e+06	631.031	361.463	689910
40	2012	2013	1	0	0	0.195126	6.17723	11.8019	111.5	15693540	0.54567	461.2	0.93582	745577	0.00356794	0.205153		132229	2253	126137	2958589	22472	18.07	0	85	290	0.968183	552.641	1132	38813.1	18.95	58.2211	2.77192e+06	739.711	394.103	759832
40	2013	2013	1	1	1	0.164692	6.22118	12.4988	109	16861549	0.508382	464.3	0.928279	911842	0.00372255	0.21102		156747	2677	123085	3374301	25366	25.64	0	89.29	363	0.961944	619.744	1000	42542.4	21.33	62.3917	2.88568e+06	711.669	467.685	600174
40	2014	2013	1	1	1	0.153725	6.2801	13.1015	107.8	17783716	0.501588	465.8	0.924216	980258	0.00488675	0.199319		110128	4404	120094	3798845	69153	24.1	0	92.83	390	0.970012	624.776	2112	44233.2	21.2265	66.0192	2.93195e+06	699.275	524.095	426221
40	2015	2013	1	1	1	0.153697	6.3261	13.7339	107.7	18612749	0.474186	462.63	1.00344	1045777	0.00345465	0.190529		127210	3713	105309	0	48763	33.13	0	93.86	452.2	0.984931	603.337	8560	44423.3	20.9906	68.4751	3.32939e+06	708.032	562.902	389220
40	2016	2013	1	1	1	0.16163	6.32193	13.892	107.2	19332792	0.469963	463	1	1117777	0.00317285	0.189167		146578	1866	56906	0	28681	29.95	0	100	505	0.99399	621.454	11217	46875	20.9901	70.814	3.4514e+06	714.617	575.951	447170
40	2017	2013	1	1	1	0.158348	6.36046	14.3203	0	2.23422e+07	0.513016	467.294	1.2443	1.22441e+06	0.00376873	0.18564		168176	3337.89	61870.3	1.62659e+06	333000	26.4007	0	98.7631	537.071	0.972714	709.136	7036.88	53094.5	21.9193	72.8464	4.37743e+06	859.486	641.003	564641
40	2018	2013	1	1	1	0.156211	6.38928	14.797	0	2.39529e+07	0.516273	468.612	1.32489	1.31588e+06	0.00380563	0.181277		180196	3450.83	49692.4	1.512e+06	334155	25.6792	0	101.916	584.569	0.970474	743.407	7498.8	56486.4	22.3696	75.5383	4.85064e+06	910.658	686.332	577822
40	2019	2013	1	1	1	0.154074	6.4181	15.2738	0	2.55637e+07	0.519531	469.93	1.40548	1.40734e+06	0.00384253	0.176914		192216	3563.76	37514.5	1.39741e+06	335310	24.9576	0	105.068	632.066	0.968234	777.677	7960.71	59878.2	22.8199	78.2301	5.32385e+06	961.83	731.662	591002
41	2000	2015	1	0	0	0.135237	5.46053	4.94794	4.78872e+06	0	0.289605	226.572	0	0	0.0064122	0.191936		0	12929.1	32139.1	271572	13291.5	129.17	4.00564	0	0	1.04317	11.7929	9065.15	0	5.98608	11.4871	0	0	0	0
41	2001	2015	1	0	0	0.138449	5.4987	5.67848	4.43401e+06	0	0.298309	228.139	0	0	0.00653786	0.191852		0	12310.3	30366.7	261746	13193.5	124.116	3.80818	0	0	1.03973	14.6307	8725.27	0	6.18126	12.6113	0	0	0	0
41	2002	2015	1	0	0	0.141662	5.53687	6.40902	4.07929e+06	0	0.307014	229.706	0	0	0.00666352	0.191769		0	11691.5	28594.3	251919	13095.4	119.062	3.61073	0	0	1.0363	17.4685	8385.39	2343.65	6.37643	13.7355	0	0	0	0
41	2003	2015	1	0	0	0.144874	5.57504	7.13956	3.72458e+06	0	0.315718	231.273	0.0482853	0	0.00678919	0.191685		0	11072.7	26821.9	242092	12997.3	114.009	3.41327	0	0	1.03286	20.3062	8045.51	4959.96	6.57161	14.8597	0	0	4.56185	0
41	2004	2015	1	0	0	0.148087	5.61321	7.8701	3.36987e+06	482257	0.324423	232.84	0.138688	34175	0.00691485	0.191602		0	10453.9	25049.5	232266	12899.3	108.955	3.21582	0	0	1.02943	23.144	7705.63	7576.28	6.76679	15.9839	0	18.2357	20.8273	0
41	2005	2015	1	0	0	0.151299	5.65138	8.60064	3.01516e+06	1.07481e+06	0.333127	234.407	0.229091	74760.2	0.00704051	0.191518		0	9835.11	23277.1	222439	12801.2	103.901	3.01836	0	0	1.02599	25.9818	7365.75	10192.6	6.96196	17.1081	0	37.9377	37.0927	0
41	2006	2015	1	0	0	0.181283	5.67453	9.45402	113.307	1940282	0.3432	233.2	0.16801	85100	0.00716617	0.191434		7105.47	10180	18175	276040	16866	91.32	0	0	32.2	1.03332	24.2733	5427	12808.9	7.15714	18.2323	0	57.6397	53.3582	0
41	2007	2015	1	0	0	0.167368	5.74364	10.3276	9.75467e+06	2318725	0.3369	236.89	0.170248	155930	0.00729183	0.191351		11515.1	6189	18424	219751	14897	94.44	0	0	34.876	1.01728	26.2558	8649	17496.3	7.55	19.326	0	78.1178	77.515	705461
41	2008	2015	1	0	0	0.150999	5.8064	10.4274	112.221	2648005	0.3562	240	0.169417	196516	0.00741749	0.191267		12848.8	7497	17378	115404	10730	92.99	0	0	44.597	0.964227	33.0617	10659	19438.2	7.44	20.597	0	89.067	84.7162	1.04857e+06
41	2009	2015	1	0	0	0.122255	5.90138	11.18	111.902	3043555	0.3529	241.96	0.99595	237101	0.00754315	0.191184		21227.7	6396	22079	134764	12125	93.59	1.55	0.44	0	1.03014	34.6865	5895	21339.2	7.6	21.7905	0	102.138	104.627	1.86092e+06
41	2010	2015	1	0	0	0.162699	5.81435	12.1459	113.432	3923691	0.38	243.35	0.997493	261595	0.00553234	0.160217		30884.2	6508	23590	121986	11731	93.67	18.62	34.51	86.762	1.03286	39.1947	2051	22261.2	7.96	23.2544	0	137.256	118.221	2.32674e+06
41	2011	2015	1	0	0	0.175646	5.77024	13.0399	112.374	4918500	0.4014	246.6	0.993917	302310	0.00743633	0.197196		41514	9061	7549	0	0	54.4	0	0	123.9	1.01621	44.2472	2238	24105	8.19	24.0513	900493	172.434	130.55	2.86321e+06
41	2012	2015	1	0	0	0.156483	5.86478	13.9321	110.769	5305100	0.409	245.4	1.00244	394902	0.00890392	0.210934		53215	9205	6630	288439	13441	63.34	0	77.65	134.8	1.01266	60.6167	3609	25510	8.17	24.8933	1.11505e+06	184.706	145.236	3.83373e+06
41	2013	2015	1	0	0	0.20619	5.89984	14.8401	109.596	5846288	0.4246	246.5	0.997566	474855	0.00961665	0.208406		48238	3885	7200	298093	12498	53.1	0	71.6	153.519	0.983921	61.9135	4577	29016.2	8.6	24.6667	1.16914e+06	205.958	155.124	5.28088e+06
41	2014	2015	1	0	0	0.184	6.02726	15.2803	108.165	6497236	0.427	248.2	0.996777	483941	0.0107545	0.205167		54863.9	3490	7146	343790	16065	65.41	0	66.76	161.3	0.977476	60.4445	6329	32178.7	8.7118	26.4156	1.26539e+06	225.671	182.915	7.34222e+06
41	2015	2015	1	1	1	0.178371	6.0735	15.7025	107.591	6828200	0.4022	248.8	0.998754	501163	0.00909281	0.183612		69157	2740	7466	0	15270	62.97	0	80.86	210.8	1.02456	61.4691	7373	38208.6	8.9918	28.5128	1.48497e+06	220.309	202.945	1.00591e+07
41	2016	2015	1	1	1	0.191024	6.10841	16.4929	107.104	7662005	0.4055	251	0.996016	407569	0.00498398	0.170415		83141	2195	3431	0	10718	44.12	0	64.79	246.2	0.966496	26.9286	1784	42433.1	9.0925	30.6457	1.59551e+06	244.351	226.334	9.6793e+06
41	2017	2015	1	1	1	0.189849	6.10942	17.3671	0	8.18548e+06	0.437582	253.211	1.31393	561782	0.00854844	0.190515		83781.4	2409.62	2008.04	104519	11624.4	43.2538	0.648909	92.408	246.935	0.984763	60.0349	3287.16	41588.4	9.30408	30.5984	1.91316e+06	274.362	232.278	1.0536e+07
41	2018	2015	1	1	1	0.193061	6.14759	18.0977	0	8.77803e+06	0.446286	254.778	1.40433	602367	0.0086741	0.190432		91173.6	1790.83	235.618	94692	11526.4	38.1999	0.451455	101.8	269.47	0.981328	62.8727	2947.28	44204.7	9.49926	31.7226	2.12409e+06	294.064	248.543	1.16334e+07
41	2019	2015	1	1	1	0.196274	6.18576	18.8282	0	9.37059e+06	0.454991	256.345	1.49473	642952	0.00879976	0.190348		98565.8	1172.04	0	84865.4	11428.3	33.146	0.254	111.192	292.005	0.977892	65.7104	2607.4	46821	9.69443	32.8468	2.33502e+06	313.766	264.809	1.27308e+07
42	2000	2015	1	0	0	0.306523	5.77357	6.00556	2.13824e+06	0	0.335273	439.354	0	0	0	0.158216		0	4192.58	19071.4	0	20630.7	96.1891	41.2131	0	0	0.998574	64.9578	0	0	9.28525	1.71718	0	0	0	0
42	2001	2015	1	0	0	0.305475	5.79679	6.44155	1.97986e+06	0	0.348535	440.235	0	0	0	0.158459		0	4292.36	18889.4	0	21015.5	95.8245	38.8064	0	0	1.00046	74.3872	0	0	9.57654	7.56658	0	0	0	0
42	2002	2015	1	0	0	0.304426	5.82001	6.87755	1.82148e+06	0	0.361797	441.117	0.0156944	0	0	0.158702		0	4392.15	18707.3	0	21400.2	95.46	36.3996	0	0	1.00234	83.8166	0	0	9.86784	13.416	0	0	8.89001	0
42	2003	2015	1	0	0	0.303377	5.84322	7.31354	1.6631e+06	0	0.375059	441.998	0.101235	0	0	0.158945		0	4491.93	18525.3	24205.2	21785	95.0955	33.9929	0	0	1.00422	93.246	0	2729.94	10.1591	19.2654	0	0	32.6404	0
42	2004	2015	1	0	0	0.302328	5.86644	7.74953	1.50472e+06	883910	0.388321	442.879	0.186775	0	0	0.159189		0	4591.71	18343.2	82313.4	22169.8	94.7309	31.5862	0	0	1.0061	102.675	0	6241.64	10.4504	25.1148	0	36.5793	56.3907	20475.5
42	2005	2015	1	0	0	0.301279	5.88965	8.18552	1.34634e+06	1.98492e+06	0.401584	443.761	0.272315	0	0	0.159432		0	4691.49	18161.1	140422	22554.6	94.3664	29.1795	0	0	1.00799	112.105	0	9753.33	10.7417	30.9642	0	83.5864	80.141	119029
42	2006	2015	1	0	0	0.268316	5.93379	8.84206	112.9	3722901	0.386527	439.99	0.212687	158100	0	0.159675		14942.8	2853	18471	62781	20434	91.9	0	0	84.976	1.02048	100.91	13008	13265	11.033	36.8136	0	130.594	103.891	217583
42	2007	2015	1	0	0	0.235494	5.99103	9.06313	4355544	4355544	0.410052	443.96	0.216483	191676	0.00177552	0.159918		23674.9	3687	19403	86924	22809	91.7	5.28	0	98.89	1.01218	155.224	19306	17751.6	11.45	50.0132	0	179.71	151.224	361319
42	2008	2015	1	0	0	0.26664	5.97622	9.09885	112.7	5201110	0.428639	447.37	0.218164	346039	0.0040635	0.160161		34622.3	3929	17595	94542	23855	90.87	12.27	0	97.007	1.02638	170.126	11395	20288.7	11.6	50.8237	0	210.5	164.137	461039
42	2009	2015	1	0	0	0.328221	5.95022	9.61434	112.9	5761845	0.454872	450.25	0.996846	500401	0.00635147	0.160404		52485	9145	15129	42254	20548	97.62	62.23	27.45	126.7	1.00663	125.044	9331	23085.8	11.98	52.42	0	249.248	170.786	446872
42	2010	2015	1	0	0	0.346346	5.98596	10.407	114.6	6956502	0.491641	450.8	0.999401	505281	0.0103741	0.159255		72350	7643	13451	29396	17927	97.52	82.35	27.49	204.681	0.995314	155.485	11745	26267.1	11.9	56.05	0	314.816	188.915	568879
42	2011	2015	1	0	0	0.3687	5.99482	11.0325	113.5	8504891	0.516938	452.9	0.997792	738584	0.00950737	0.162063		69013	3972	17233	1551767	40134	81	0	93.5	286.3	1.02697	136.107	36280	30462.2	12.53	57.8027	1.60048e+06	383.963	207.469	638305
42	2012	2015	1	0	0	0.352373	6.00945	11.5663	112.1	9707413	0.522889	452.1	1.00088	969419	0.0137161	0.165156		88258.8	5089	17702	949608	37392	96.36	0	92.69	328.119	1.02646	192.043	53739	35608.8	12.67	61.8563	1.96667e+06	432.104	230.142	823493
42	2013	2015	1	0	0	0.308861	6.03016	11.6198	110.4	10861431	0.544715	449.5	1.00289	1144231	0.0138536	0.160393		107578	6460	18522	1186099	0	96.77	0	92.63	425	1.00763	200.311	72596	37500.6	13.16	82.2965	2.08149e+06	477.62	250.885	953418
42	2014	2015	1	0	0	0.292745	6.08884	12.3686	109.2	12144000	0.5362	449.6	0.999778	1236295	0.0173649	0.157599		124816	5755	20525	1376410	43899	96.56	0	79.62	480.3	1.01445	205.194	92353	41318.4	13.5718	90.6076	2.18687e+06	529.673	284	1.10143e+06
42	2015	2015	1	1	1	0.263209	6.12401	12.5758	108.7	13056964	0.503191	449.06	1.0006	1437304	0.0205713	0.159267		145760	5860	18516	0	35263	96.36	0	95.3	588.1	1.01705	204.849	105886	45192.6	13.4855	97.2703	2.4275e+06	557.44	312.238	1.02237e+06
42	2016	2015	1	1	1	0.213947	6.2339	12.6278	108.7	14228257	0.49706	454	0.995595	1673062	0.0231363	0.165908		169921	3799	11210	0	11236	77.31	0	83.97	702.9	1.05852	210.198	114366	48317.4	14.004	90.7125	2.63352e+06	556.258	385.386	1.21915e+06
42	2017	2015	1	1	1	0.288694	6.16824	13.4174	0	1.51971e+07	0.56073	454.336	1.2988	1.7353e+06	0.0246553	0.16235		172670	5888.87	15976.5	837720	27172.1	89.9918	0.298727	121.267	688.436	1.03057	225.258	118065	51893.6	14.2372	101.157	3.23096e+06	647.673	365.145	1.30167e+06
42	2018	2015	1	1	1	0.287645	6.19145	13.8534	0	1.62981e+07	0.573992	455.217	1.38434	1.88966e+06	0.0269433	0.162593		187760	5988.65	15794.4	895829	27556.9	89.6273	0	132.498	751.312	1.03246	234.687	129560	55405.3	14.5285	107.006	3.58392e+06	694.68	388.896	1.40022e+06
42	2019	2015	1	1	1	0.286596	6.21467	14.2894	0	1.73991e+07	0.587254	456.098	1.46988	2.04403e+06	0.0292312	0.162836		202850	6088.44	15612.4	953937	27941.7	89.2627	0	143.73	814.189	1.03434	244.117	141056	58917	14.8198	112.856	3.93689e+06	741.687	412.646	1.49878e+06
43	2000	2015	1	0	0	0.230664	6.13042	6.39806	4.78872e+06	0	0.430455	416.978	0.037318	143200	0.0091916	0.200747		0	10271.1	90572.5	1.26821e+06	13196.5	79.549	103.925	46.2109	0	1.04201	448.747	0	1074.79	8.81297	16.3446	0	145.66	0	4.6972e+06
43	2001	2015	1	0	0	0.234132	6.15394	6.82128	4.43401e+06	0	0.428265	419.543	0.107842	143200	0.00963246	0.199367		0	10003.1	87505.6	1.27285e+06	15020.2	79.4294	96.8013	49.0163	0	1.04058	477.581	3972.74	3869.65	10.3149	23.6229	0	199.72	0	4.87613e+06
43	2002	2015	1	0	0	0.2376	6.17747	7.2445	4.07929e+06	0	0.426074	422.107	0.178366	143200	0.0100733	0.197988		0	9735.21	84438.6	1.2775e+06	16844	79.3098	89.6775	51.8216	0	1.03914	506.414	10872.8	6664.52	11.8167	30.9011	0	253.781	0	5.05507e+06
43	2003	2015	1	0	0	0.241067	6.20099	7.66771	3.72458e+06	0	0.423884	424.672	0.248891	143200	0.0105142	0.196608		0	9467.28	81371.7	1.28215e+06	18667.7	79.1902	82.5536	54.627	0	1.03771	535.248	17772.9	9459.38	13.3186	38.1793	0	307.842	64.1668	5.23401e+06
43	2004	2015	1	0	0	0.244535	6.22451	8.09093	3.36987e+06	489326	0.421694	427.236	0.319415	143200	0.0109551	0.195229		0	9199.35	78304.8	1.2868e+06	20491.4	79.0706	75.4298	57.4323	48.3346	1.03628	564.082	24673	12254.2	14.8205	45.4575	0	361.902	136.808	5.41295e+06
43	2005	2015	1	0	0	0.248003	6.24803	8.51415	3.01516e+06	1.13709e+06	0.419503	429.801	0.389939	143200	0.0113959	0.193849		9061.56	8931.41	75237.8	1.29144e+06	22315.1	78.951	68.306	60.2376	121.175	1.03484	592.915	31573.1	15049.1	16.3224	52.7358	0	415.963	209.449	5.59189e+06
43	2006	2015	1	0	0	0.253169	6.29239	9.04104	113.307	2174240	0.397	417.797	0.347571	143200	0.0118368	0.192469		35061.5	7984.18	69062.6	797507	28520.8	76.1273	45.0736	59.8051	245.178	1.04343	581.313	36324	17844	17.8242	60.014	0	470.024	282.091	5.77083e+06
43	2007	2015	1	0	0	0.250735	6.30615	9.74628	9.75467e+06	2535665	0.407	422.501	0.330949	143200	0.0122776	0.19109		43879.3	8517.05	67749.6	840498	24525.4	77.0793	50.0784	65.4194	276.387	1.04203	670.163	43462.3	21081	20.34	71.5942	0	480.548	379.017	5.80806e+06
43	2008	2015	1	0	0	0.260135	6.30996	10.0309	112.221	3060166	0.417	427.241	0.335398	143200	0.0127185	0.18971		54856.6	8134.07	63771.2	1.00161e+06	21683.4	78.7751	56.2903	69.1482	334.449	1.04678	717.338	52754.7	23168.2	20.9601	74.9442	0	548.718	422.795	5.88064e+06
43	2009	2015	1	0	0	0.265596	6.36275	10.213	111.902	3439465	0.402971	430.016	0.999679	143200	0.0131594	0.188331		72444.9	7705.22	58580	1.03232e+06	18974.5	78.8716	59.3137	71.8611	404.53	0.999998	694.423	55218.9	26222.7	21.7966	79.7971	0	597.015	500.241	5.44026e+06
43	2010	2015	1	0	0	0.261458	6.363	10.4926	113.432	4047301	0.425	435.911	0.99299	143200	0.0130497	0.175949		89042.4	7935.92	59520	1.22768e+06	18776.1	82.141	70.4389	77.0939	453.781	0.962175	741.85	64029.4	28720.6	22.5665	84.324	0	703.665	568.741	7.03306e+06
43	2011	2015	1	0	0	0.26709	6.36238	10.5537	112.374	4825000	0.432	550.873	0.990383	143200	0.0141463	0.184687		99551.2	7734.08	65414.5	2.60249e+06	51294.5	76.5802	0	79.3297	537.299	1.02958	743.569	75882.7	32145	24.2132	93.1664	2.18593e+06	806.969	639.637	7.18408e+06
43	2012	2015	1	0	0	0.266736	6.37823	10.8598	110.769	5700200	0.42	441.512	0.990127	143200	0.0146282	0.201541		121777	7274.26	59491.8	2.26928e+06	48979.9	78.3541	0	83.5111	602.098	1.05211	791.278	86874.7	34629.8	26.4125	102.345	2.49915e+06	862.677	693.859	7.25244e+06
43	2013	2015	1	0	0	0.28564	6.40233	11.54	109.596	6325000	0.416	441.241	0.992699	143200	0.0154208	0.186375		143483	7086.1	53915.9	2.3351e+06	38751.7	81.4615	0	74.6039	696.352	1.05902	852.035	95421	37252.1	30.2453	116.211	2.84314e+06	902.384	777.188	7.44149e+06
43	2014	2015	1	0	0	0.276394	6.45332	12.2595	108.165	7056600	0.39	445.286	0.990786	143200	0.0162252	0.178112		162107	6782.45	55073	2.40613e+06	43354.9	82.5167	0	89.8465	758.307	1.05187	880.639	100278	39517.6	30.7268	120.152	2.92794e+06	922.575	861.239	7.5993e+06
43	2015	2015	1	1	1	0.293633	6.50189	13.2194	107.591	7629700	0.383	444.56	0.99673	143200	0.0147798	0.177048		179568	6572.47	48701.5	0	48312.2	80.1238	0	90.4455	819.73	1.00388	858.07	93665.4	43138.7	32.28	128.96	3.37529e+06	917.443	944.597	7.16127e+06
43	2016	2015	1	1	1	0.276313	6.54838	13.6319	107.104	8467200	0.38	440.133	0.97661	143200	0.0162098	0.175976		191845	4836.31	23918.7	0	22658.6	68.5373	0	86.7022	1012.29	0.997759	894.418	98799.9	46281.5	31.3048	128.947	3.58588e+06	931.577	1028.87	6.74937e+06
43	2017	2015	1	1	1	0.289615	6.53029	13.5928	0	8.91028e+06	0.393219	460.576	1.23623	143200	0.0166863	0.177294		207959	5716.24	38434.7	1.34721e+06	44199.8	77.5159	0	93.9017	995.261	1.01764	938.92	114374	48587.5	34.3449	140.074	4.38781e+06	1064.69	1081.15	7.73916e+06
43	2018	2015	1	1	1	0.293083	6.55382	14.016	0	9.55804e+06	0.391028	463.14	1.30675	143200	0.0171271	0.175915		224534	5448.31	35367.7	1.35186e+06	46023.5	77.3963	0	96.7071	1068.1	1.0162	967.754	121274	51382.3	35.8468	147.353	4.86891e+06	1118.75	1153.79	7.9181e+06
43	2019	2015	1	1	1	0.296551	6.57734	14.4392	0	1.02058e+07	0.388838	465.705	1.37728	143200	0.017568	0.174535		241109	5180.38	32300.8	1.35651e+06	47847.2	77.2767	0	99.5124	1140.94	1.01477	996.588	128175	54177.2	37.3487	154.631	5.35002e+06	1172.81	1226.43	8.09704e+06
44	2000	2015	1	0	0	0.540708	5.46801	3.52474	2.50577e+06	0	0.409257	626.346	0	0	0.00515336	0.117412		0	6565.27	201307	1.86815e+06	29062.9	130.845	58.6775	97.4365	0	1.01141	0	0	0	9.63253	0.855365	0	0	0	0
44	2001	2015	1	0	0	0.544052	5.50533	4.09831	2.32017e+06	0	0.407887	630.763	0	0	0.00514029	0.123926		0	6201.82	189456	1.82607e+06	28257.8	127.024	54.4482	94.0691	0	1.01163	11.9054	0	0	10.2967	6.66432	0	7.36082	0	0
44	2002	2015	1	0	0	0.547397	5.54264	4.67188	2.13456e+06	0	0.406516	635.179	0	0	0.00512721	0.13044		0	5838.36	177606	1.78399e+06	27452.8	123.202	50.2189	90.7016	0	1.01186	30.5634	0	2730.44	10.9609	12.4733	0	46.7182	0	0
44	2003	2015	1	0	0	0.550741	5.57996	5.24545	1.94896e+06	673414	0.405145	639.596	0.0541807	0	0.00511414	0.136954		0	5474.91	165755	1.7419e+06	26647.7	119.38	45.9896	87.3342	0	1.01209	49.2215	0	5496.04	11.625	18.2822	0	86.0755	20.9172	0
44	2004	2015	1	0	0	0.554085	5.61727	5.81902	1.76335e+06	1.78868e+06	0.403774	644.013	0.144104	0	0.00510106	0.143467		0	5111.45	153904	1.69982e+06	25842.7	115.559	41.7604	83.9667	0	1.01232	67.8795	0	8261.64	12.2892	24.0912	0	125.433	47.3189	0
44	2005	2015	1	0	0	0.557429	5.65458	6.39259	1.57775e+06	2.90395e+06	0.402403	648.43	0.234026	0	0.00508799	0.149981		2765.8	4748	142053	1.65773e+06	25037.6	111.737	37.5311	80.5993	0	1.01255	86.5376	181.436	11027.2	12.9534	29.9001	0	164.79	73.7205	3351.39
44	2006	2015	1	0	0	0.511457	5.73518	7.30758	113.3	4003974	0.373629	646.3	0.172598	114700	0.00507491	0.156495		22607.7	4404	104691	806150	68272	85.24	49.97	100	67.417	1.02932	96.3803	310	13792.8	13.6176	35.7091	0	204.148	100.122	17626
44	2007	2015	1	0	0	0.617602	5.68426	7.379	5104223	5104223	0.391245	650.11	0.179154	137617	0.00506184	0.163009		30660	3852	136675	1055532	10502	96.5	23.8	100	96.91	0.979148	124.953	1300	17029.2	15.53	48.1324	0	199.677	147.206	24028.6
44	2008	2015	1	0	0	0.5849	5.71725	8.12006	111	6039863	0.40683	655.97	0.185512	216078	0.00504876	0.169523		41872.3	3659	119401	1684503	4351	99.6	20.8	100	104.255	1.01642	142.992	1550	19414.1	15.1	48.5334	0	232.013	163.63	55901.8
44	2009	2015	1	0	0	0.578078	5.83777	8.66512	114.5	6827297	0.452639	657.56	0.998799	294540	0.00503568	0.176037		54532.3	3822	106933	1026432	7530	99.83	18.63	13.79	156.691	1.0314	170.03	1780	21651.9	15.83	48.4121	0	293.845	185.942	55156.7
44	2010	2015	1	0	0	0.593208	5.87629	9.20167	115.1	8192030	0.400841	685.49	0.979635	305924	0.0048518	0.178655		60132.5	3225	85222	1176299	7307	99.77	20.51	15.78	227.533	0.96206	171.785	5050	24416.1	16.06	50.0492	0	377.065	197.582	44058.6
44	2011	2015	1	0	0	0.521152	5.88339	9.95126	115	10118289	0.380252	690.7	0.994354	411542	0.00476903	0.174952		67684	2694	57693	3153951	15495	99.6	0	23.53	295.785	1.04729	195.63	5080	27742.3	15.99	70.11	1.74826e+06	464.932	215.542	86297.9
44	2012	2015	1	0	0	0.573403	5.9169	10.0295	112.6	11354623	0.371065	695.6	0.99655	520360	0.00519236	0.209888		82630	232	55375	2465599	14883	98.93	0	26.39	370	1.03487	216.947	5308	30928.3	16.33	68.7113	2.04605e+06	515.189	239.423	99251
44	2013	2015	1	0	0	0.567462	5.93834	10.9594	110	12454149	0.394326	687.6	1.00044	603088	0.00540864	0.218363		100286	2062	20602	2826492	12792	99.81	0	100	366.4	1.03029	203.319	4797	32770.6	17.83	70.6087	2.1661e+06	549.104	263.082	164976
44	2014	2015	1	0	0	0.604131	5.9785	11.2496	108.5	13478324	0.390664	688.1	0.999709	724120	0.00505427	0.20271		114870	2222	48069	1262584	34827	98.9	0	92.85	488.7	1.01618	332.245	6000	35293.1	17.8478	89.7838	2.33747e+06	573.947	296.676	162943
44	2015	2015	1	1	1	0.626293	5.98419	12.2128	107.9	13507623	0.395103	682.8	1.00391	791548	0.00495724	0.214793		133168	2068	45767	0	46321	98.7	0	92	580	1.01187	290.723	8050	39044.5	20.1824	87.9601	2.60179e+06	527.485	322.798	185257
44	2016	2015	1	1	1	0.574744	6.11102	13.0981	107.8	14470836	0.379363	684	0.998538	846580	0.00465032	0.215283		150012	0	0	0	0	0	0	0	696.2	0.994186	238.342	5087	41746.5	22.0047	94.2827	2.82433e+06	472.874	421.433	83494.5
44	2017	2015	1	1	1	0.597558	6.10234	13.2754	0	1.62872e+07	0.385953	701.43	1.3131	922233	0.00493108	0.228147		153317	386.545	0	1.15273e+06	15376.9	65.8775	0	40.1898	684.072	1.01528	310.434	7875.29	44214.5	20.9234	99.6076	3.4429e+06	637.079	390.54	174647
44	2018	2015	1	1	1	0.600902	6.13966	13.849	0	1.74024e+07	0.384582	705.847	1.40302	1.00069e+06	0.004918	0.234661		165863	23.0909	0	1.11064e+06	14571.9	62.0558	0	36.8224	745.812	1.01551	329.092	8516.45	46980.1	21.5876	105.417	3.81935e+06	676.436	416.942	188922
44	2019	2015	1	1	1	0.604247	6.17697	14.4226	0	1.85177e+07	0.383211	710.264	1.49295	1.07916e+06	0.00490493	0.241175		178409	0	0	1.06856e+06	13766.8	58.2342	0	33.4549	807.553	1.01574	347.751	9157.6	49745.7	22.2518	111.226	4.1958e+06	715.793	443.344	203196
45	2000	2015	1	0	0	0.230664	6.13042	5.39196	4.78872e+06	0	0.340607	416.978	0.037318	187500	0.0091916	0.200747		0	10271.1	90572.5	1.26821e+06	13196.5	79.549	103.925	46.2109	0	0.993888	448.747	0	1074.79	8.81297	16.3446	0	145.66	0	4.6972e+06
45	2001	2015	1	0	0	0.234132	6.15394	5.8585	4.43401e+06	0	0.345215	419.543	0.107842	187500	0.00963246	0.199367		0	10003.1	87505.6	1.27285e+06	15020.2	79.4294	96.8013	49.0163	0	0.995931	477.581	3972.74	3869.65	10.3149	23.6229	0	199.72	0	4.87613e+06
45	2002	2015	1	0	0	0.2376	6.17747	6.32505	4.07929e+06	0	0.349822	422.107	0.178366	187500	0.0100733	0.197988		0	9735.21	84438.6	1.2775e+06	16844	79.3098	89.6775	51.8216	0	0.997974	506.414	10872.8	6664.52	11.8167	30.9011	0	253.781	0	5.05507e+06
45	2003	2015	1	0	0	0.241067	6.20099	6.7916	3.72458e+06	71559.3	0.354429	424.672	0.248891	187500	0.0105142	0.196608		0	9467.28	81371.7	1.28215e+06	18667.7	79.1902	82.5536	54.627	0	1.00002	535.248	17772.9	9459.38	13.3186	38.1793	0	307.842	64.1668	5.23401e+06
45	2004	2015	1	0	0	0.244535	6.22451	7.25815	3.36987e+06	807218	0.359037	427.236	0.319415	187500	0.0109551	0.195229		0	9199.35	78304.8	1.2868e+06	20491.4	79.0706	75.4298	57.4323	48.3346	1.00206	564.082	24673	12254.2	14.8205	45.4575	0	361.902	136.808	5.41295e+06
45	2005	2015	1	0	0	0.248003	6.24803	7.7247	3.01516e+06	1.54288e+06	0.363644	429.801	0.389939	187500	0.0113959	0.193849		9061.56	8931.41	75237.8	1.29144e+06	22315.1	78.951	68.306	60.2376	121.175	1.0041	592.915	31573.1	15049.1	16.3224	52.7358	0	415.963	209.449	5.59189e+06
45	2006	2015	1	0	0	0.253169	6.29239	7.87226	113.307	2751702	0.356	417.797	0.347571	187500	0.0118368	0.192469		35061.5	7984.18	69062.6	797507	28520.8	76.1273	45.0736	59.8051	245.178	1.04345	581.313	36324	17844	17.8242	60.014	0	470.024	282.091	5.77083e+06
45	2007	2015	1	0	0	0.250735	6.30615	8.86302	9.75467e+06	3214275	0.372	422.501	0.330949	187500	0.0122776	0.19109		43879.3	8517.05	67749.6	840498	24525.4	77.0793	50.0784	65.4194	276.387	0.962853	670.163	43462.3	21081	20.34	71.5942	0	480.548	379.017	5.80806e+06
45	2008	2015	1	0	0	0.260135	6.30996	8.96942	112.221	3716977	0.367	427.241	0.335398	187500	0.0127185	0.18971		54856.6	8134.07	63771.2	1.00161e+06	21683.4	78.7751	56.2903	69.1482	334.449	1.05546	717.338	52754.7	23168.2	20.9601	74.9442	0	548.718	422.795	5.88064e+06
45	2009	2015	1	0	0	0.265596	6.36275	9.40215	111.902	4044965	0.35965	430.016	0.999679	187500	0.0131594	0.188331		72444.9	7705.22	58580	1.03232e+06	18974.5	78.8716	59.3137	71.8611	404.53	1.00521	694.423	55218.9	26222.7	21.7966	79.7971	0	597.015	500.241	5.44026e+06
45	2010	2015	1	0	0	0.261458	6.363	10.0423	113.432	4741287	0.397	435.911	0.99299	187500	0.0130497	0.175949		89042.4	7935.92	59520	1.22768e+06	18776.1	82.141	70.4389	77.0939	453.781	1.00431	741.85	64029.4	28720.6	22.5665	84.324	0	703.665	568.741	7.03306e+06
45	2011	2015	1	0	0	0.26709	6.36238	10.7726	112.374	5681000	0.419	550.873	0.990383	187500	0.0141463	0.184687		99551.2	7734.08	65414.5	2.60249e+06	51294.5	76.5802	0	79.3297	537.299	0.992643	743.569	75882.7	32145	24.2132	93.1664	2.18593e+06	806.969	639.637	7.18408e+06
45	2012	2015	1	0	0	0.266736	6.37823	11.654	110.769	6720900	0.423925	441.512	0.990127	187500	0.0146282	0.201541		121777	7274.26	59491.8	2.26928e+06	48979.9	78.3541	0	83.5111	602.098	0.97634	791.278	86874.7	34629.8	26.4125	102.345	2.49915e+06	862.677	693.859	7.25244e+06
45	2013	2015	1	0	0	0.28564	6.40233	11.7054	109.596	7607700	0.419588	441.241	0.992699	187500	0.0154208	0.186375		143483	7086.1	53915.9	2.3351e+06	38751.7	81.4615	0	74.6039	696.352	1.03554	852.035	95421	37252.1	30.2453	116.211	2.84314e+06	902.384	777.188	7.44149e+06
45	2014	2015	1	0	0	0.276394	6.45332	11.7644	108.165	8323300	0.413	445.286	0.990786	187500	0.0162252	0.178112		162107	6782.45	55073	2.40613e+06	43354.9	82.5167	0	89.8465	758.307	1.03615	880.639	100278	39517.6	30.7268	120.152	2.92794e+06	922.575	861.239	7.5993e+06
45	2015	2015	1	1	1	0.293633	6.50189	12.0608	107.591	9001000	0.395	444.56	0.99673	187500	0.0147798	0.177048		179568	6572.47	48701.5	0	48312.2	80.1238	0	90.4455	819.73	1.02131	858.07	93665.4	43138.7	32.28	128.96	3.37529e+06	917.443	944.597	7.16127e+06
45	2016	2015	1	1	1	0.276313	6.54838	12.6574	107.104	9722000	0.382	440.133	0.97661	187500	0.0162098	0.175976		191845	4836.31	23918.7	0	22658.6	68.5373	0	86.7022	1012.29	1.04667	894.418	98799.9	46281.5	31.3048	128.947	3.58588e+06	931.577	1028.87	6.74937e+06
45	2017	2015	1	1	1	0.289615	6.53029	13.3233	0	1.03708e+07	0.418931	460.576	1.23623	187500	0.0166863	0.177294		207959	5716.24	38434.7	1.34721e+06	44199.8	77.5159	0	93.9017	995.261	1.02861	938.92	114374	48587.5	34.3449	140.074	4.38781e+06	1064.69	1081.15	7.73916e+06
45	2018	2015	1	1	1	0.293083	6.55382	13.7898	0	1.11064e+07	0.423539	463.14	1.30675	187500	0.0171271	0.175915		224534	5448.31	35367.7	1.35186e+06	46023.5	77.3963	0	96.7071	1068.1	1.03066	967.754	121274	51382.3	35.8468	147.353	4.86891e+06	1118.75	1153.79	7.9181e+06
45	2019	2015	1	1	1	0.296551	6.57734	14.2564	0	1.18421e+07	0.428146	465.705	1.37728	187500	0.017568	0.174535		241109	5180.38	32300.8	1.35651e+06	47847.2	77.2767	0	99.5124	1140.94	1.0327	996.588	128175	54177.2	37.3487	154.631	5.35002e+06	1172.81	1226.43	8.09704e+06
46	2000	2012	1	0	0	0.0425155	6.48541	1.47535	1.53689e+07	0	0.518455	564.072	0.386374	754753	0.0887699	0.154349		66287.8	30185.8	55236.6	2.23536e+06	0	91.6146	166.386	84.6337	538.072	0.9602	1634.8	291495	7232.97	29.4056	228.137	0	1122.98	62.5036	3.18111e+07
46	2001	2012	1	0	0	0.0468341	6.50761	2.13087	1.42304e+07	2.38384e+06	0.514427	566.174	0.431773	1.19983e+06	0.0848271	0.152073		95068.6	30265.3	58064.4	2.25673e+06	0	91.4964	154.861	85.1591	598.479	0.963301	1716.04	333701	10457.2	31.3356	231.58	0	1241.98	255.855	3.17516e+07
46	2002	2012	1	0	0	0.0511527	6.52982	2.78639	1.3092e+07	7.78799e+06	0.510399	568.275	0.477172	1.64491e+06	0.0808842	0.149797		123849	30344.7	60892.1	2.2781e+06	2751.98	91.3781	143.336	85.6845	658.887	0.966403	1797.29	375906	13681.5	33.2656	235.023	0	1360.98	449.206	3.16922e+07
46	2003	2012	1	0	0	0.0554713	6.55202	3.44191	1.19536e+07	1.31921e+07	0.506372	570.376	0.522572	2.08999e+06	0.0769414	0.14752		152630	30424.2	63719.9	2.29947e+06	6650.78	91.2598	131.811	86.2098	719.295	0.969504	1878.54	418112	16905.8	35.1955	238.467	0	1479.98	642.557	3.16327e+07
46	2004	2012	1	0	0	0.0597899	6.57423	4.09743	1.08152e+07	1.85963e+07	0.502344	572.477	0.567971	2.53506e+06	0.0729985	0.145244		181411	30503.7	66547.7	2.32084e+06	10549.6	91.1415	120.286	86.7352	779.703	0.972606	1959.79	460318	20130.1	37.1255	241.91	0	1598.98	835.908	3.15732e+07
46	2005	2012	1	0	0	0.0641085	6.59643	4.75295	9.67673e+06	2.40005e+07	0.498316	574.578	0.61337	2.98014e+06	0.0690557	0.142968		210192	30583.2	69375.4	2.34221e+06	14448.4	91.0233	108.762	87.2605	840.111	0.975708	2041.03	502523	23354.4	39.0555	245.353	0	1717.98	1029.26	3.15137e+07
46	2006	2012	1	0	0	0.067414	6.6785	5.58057	113.8	25696699	0.464573	572.08	0.574885	1961400	0.0651128	0.140692		146949	33709	0	777930	21515	78.69	80.37	84.44	748.631	0.962467	2056.25	224477	26578.6	40.9855	248.796	0	1836.98	1222.61	3.14543e+07
46	2007	2012	1	0	0	0.0677939	6.66167	6.21106	31306789	31306789	0.463031	578.19	0.582559	3.8703e+06	0.06117	0.138416		193076	34463	95172	922906	19712	91.07	81.08	93.29	901.256	0.990517	2238.58	316276	28270.5	42.46	221.443	0	1535.6	1345.88	2.95373e+07
46	2008	2012	1	0	0	0.0945231	6.63331	6.47349	113.4	38582471	0.477808	583.37	0.596243	4.31537e+06	0.0572271	0.136139		251338	27386	101242	2359289	18768	95.73	87.18	93.73	1020.81	0.99801	2374.16	500678	32393.2	46.42	225.799	0	1882.85	1487.56	3.08503e+07
46	2009	2012	1	0	0	0.0853095	6.70529	7.15772	113.1	43495050	0.489067	584.8	0.998786	4.76045e+06	0.0532843	0.133863		327351	27820	83765	3026825	23220	94.87	92.91	94.02	1231.96	0.98766	2305.79	601697	36863.7	44.93	240.514	0	2022.98	1815.35	2.74393e+07
46	2010	2012	1	0	0	0.0725349	6.69266	8.03433	114.2	51581621	0.505994	586.44	0.998602	5008322	0.0435068	0.123219		350392	27421	78866	2166019	24171	95.9	94.2	86	1158.47	0.977673	2427.28	1003025	41071	45.66	269.096	0	2416	2014.76	3.23938e+07
46	2011	2012	1	0	0	0.0754539	6.68194	8.57354	112.2	61506265	0.520952	588.5	0.998301	6511266	0.0451264	0.131783		455356	31488	132003	4487995	51099	93.88	0	85.7	1331.1	1.02702	2380.57	1101208	43432.4	52.46	294.356	6.41898e+06	2798.79	2227.75	3.41343e+07
46	2012	2012	1	1	1	0.0968614	6.6849	9.5171	109.5	70028306	0.519048	590.3	0.998475	7501085	0.0440954	0.153722		562440	30795	114589	5445970	52149	95.56	0	87.9	1416.12	0.980199	2612.83	1235033	46667.5	53.16	307.035	7.58445e+06	3093.91	2482.88	3.44522e+07
46	2013	2012	1	1	1	0.110694	6.71716	9.9281	108.7	76507861	0.465142	591.5	0.998986	8501646	0.0426904	0.112783		647810	26154	102938	4179954	46332	90.33	0	87.9	1295.96	0.989308	2967.58	1359985	49004.1	57.42	339.57	8.99006e+06	3229.14	2722.58	3.53644e+07
46	2014	2012	1	1	1	0.0978683	6.79573	10.7306	105.8	76555761	0.45845	594.3	0.997644	7808645	0.0434843	0.106027		677363	40150	94370	3807882	72465	83.66	0	81.56	1320.9	1.00161	2874.88	1400453	51741.7	57.6989	369.223	8.0485e+06	3007.77	2860.18	3.22348e+07
46	2015	2012	1	1	1	0.110672	6.89671	11.6423	103	77316363	0.433117	593.56	1.00062	5799130	0.0200758	0.120135		455928	34565	95796	0	54112	78.45	0	100	1307.42	1.01618	2717.45	270302	55664.4	58.227	209.345	7.30555e+06	2686.21	3152.63	2.75102e+07
46	2016	2012	1	1	1	0.111094	6.87831	11.6981	97.5	68101998	0.418469	596	0.998322	6119041	0.023611	0.125639		143636	27709	51021	0	32710	95.31	0	100	1495.48	1.00685	2858.34	300200	58013	57.5682	200.963	6.84446e+06	2241.49	2750.84	2.7355e+07
46	2017	2012	1	1	1	0.115931	6.86288	12.6192	0	8.88503e+07	0.449984	599.793	1.15816	8.32107e+06	0.0217415	0.115654		555561	31536.8	103309	2.59865e+06	61234	89.604	0	93.5649	1565	1.01293	3016	1.00899e+06	62045.7	62.2153	286.672	1.05564e+07	3145.97	3349.47	3.08001e+07
46	2018	2012	1	1	1	0.12025	6.88508	13.2747	0	9.42545e+07	0.445956	601.894	1.20356	8.76615e+06	0.0177986	0.113377		584342	31616.3	106136	2.62002e+06	65132.8	89.4857	0	94.0903	1625.41	1.01603	3097.25	1.0512e+06	65270	64.1453	290.115	1.16541e+07	3264.97	3542.82	3.07406e+07
46	2019	2012	1	1	1	0.124569	6.90728	13.9302	0	9.96586e+07	0.441928	603.995	1.24896	9.21122e+06	0.0138558	0.111101		613122	31695.8	108964	2.64139e+06	69031.6	89.3675	0	94.6156	1685.82	1.01913	3178.5	1.0934e+06	68494.2	66.0753	293.559	1.27518e+07	3383.97	3736.17	3.06811e+07
47	2000	2013	1	0	0	0.304921	6.1904	4.37041	8.94579e+06	8.95529e+06	1.03174	273.063	0.260119	244785	0.0224405	0.179631		44259.3	14448.6	96112.3	3.08693e+06	49756.9	102.698	155.074	48.6185	294.195	1.07478	2056.66	0	9643.33	23.0036	86.0091	0	1971.28	0	0
47	2001	2013	1	0	0	0.29725	6.20688	4.8784	8.28315e+06	10808786	1.00874	273.472	0.313574	323985	0.0213079	0.18005		47893.2	13693.1	91562.5	2.9417e+06	47852.5	100.547	144.387	51.4909	302.903	1.06995	2049.39	0	12749.2	23.1691	86.0841	0	1978.23	0	0
47	2002	2013	1	0	0	0.289579	6.22335	5.38639	7.62051e+06	1.26623e+07	0.98575	273.88	0.367029	403186	0.0201753	0.18047		51527.2	12937.6	87012.6	2.79646e+06	45948	98.3969	133.701	54.3634	311.611	1.06513	2042.12	0	15855.1	23.3346	86.159	0	1985.18	0	0
47	2003	2013	1	0	0	0.281908	6.23983	5.89438	6.95786e+06	1.45158e+07	0.962756	274.289	0.420485	482386	0.0190427	0.180889		55161.1	12182	82462.7	2.65122e+06	44043.6	96.2465	123.015	57.2358	320.319	1.06031	2034.84	0	18960.9	23.5002	86.2339	0	1992.13	0	0
47	2004	2013	1	0	0	0.274237	6.2563	6.40237	6.29522e+06	1.63693e+07	0.939761	274.698	0.47394	561587	0.01791	0.181308		58795.1	11426.5	77912.9	2.50598e+06	42139.2	94.0962	112.328	60.1083	329.027	1.05548	2027.57	915.282	22066.8	23.6657	86.3088	0	1999.08	31.8611	0
47	2005	2013	1	0	0	0.266566	6.27278	6.91036	5.63258e+06	1.82228e+07	0.916767	275.106	0.527395	640787	0.0167774	0.181728		62429	10671	73363	2.36074e+06	40234.8	91.9458	101.642	62.9807	337.735	1.05066	2020.3	5563.53	25172.7	23.8312	86.3837	0	2006.04	92.4153	0
47	2006	2013	1	0	0	0.217816	6.3147	7.70696	112	16203336	0.856429	269.3	0.486149	538000	0.0156448	0.182147		38767.8	7984	61594	1301978	41342	79.02	65.76	82.94	291.098	1.04915	2107	4429	28278.5	23.9967	86.4586	0	2012.99	152.969	0
47	2007	2013	1	0	0	0.235961	6.32648	8.17522	18222781	18222781	0.849651	273.36	0.490013	799188	0.0145122	0.182567		48599.6	8373	60916	2101399	35022	80.72	79.53	85.16	329.72	1.04933	2282.89	9267	29680.7	23.94	82.8043	0	1548.39	218.856	516366
47	2008	2013	1	0	0	0.269709	6.32151	8.36816	111.8	22203734	0.85078	277.23	0.493453	878389	0.0133796	0.182986		60335.7	8984	57254	794257	33902	88.47	85.49	85.16	371.64	1.04144	2286.22	11698	32249.2	24.26	78.0511	0	1783.85	247.407	537245
47	2009	2013	1	0	0	0.211622	6.3715	8.59663	111.4	21200036	0.786782	280.17	0.987686	957589	0.012247	0.183405		75350.2	8578	59814	1768581	30007	70.63	90.13	20.89	419.819	0.974539	1551.81	13997	39343.2	24.73	86.4269	0	1586.19	353.406	716174
47	2010	2013	1	0	0	0.249577	6.34847	9.09083	112.7	29000642	0.82243	279.8	0.993567	958964	0.00946982	0.179163		103606	8786	60515	4225279	29715	70.77	91.85	50.1	379.875	1.05448	1730.52	34587	42059.2	24.21	88.4576	0	2195.56	386.572	960595
47	2011	2013	1	0	0	0.249874	6.33783	9.97117	112.3	37415389	0.82052	281.6	0.96946	1319293	0.00797174	0.161555		105665	5542	56926	1553036	21561	95.92	0	87	396.279	1.04437	1720.92	42210	43267.7	25.5	95.7604	1.52401e+06	2681.28	469.265	1.2179e+06
47	2012	2013	1	0	0	0.245394	6.34117	10.2402	110	40010695	0.808766	281.6	0.993253	1403267	0.0109525	0.202364		137551	6565	55054	1754865	31461	96.2	0	95	430	1.00994	1847.18	50307	48004.2	25.09	98.7142	1.54064e+06	2754.76	520.094	1.50935e+06
47	2013	2013	1	1	1	0.243644	6.34514	11.0876	108	41814993	0.793589	282.6	0.967799	1436000	0.0138056	0.197264		152789	5174	4703	1319166	29463	96.42	0	95.19	583	1.01449	2059.02	60032	53353.7	25.12	92.5416	1.53521e+06	2753.3	570.365	1.73313e+06
47	2014	2013	1	1	1	0.20692	6.37279	11.6769	105.6	40775057	0.768362	276	0.982609	1410421	0.0046438	0.199595		91956.4	3835	38435	1563708	31979	95.48	0	90.43	317.638	0.979124	2098.41	68000	55045.7	25.3191	97.1558	1.45544e+06	2505.15	655.391	2.02565e+06
47	2015	2013	1	1	1	0.159464	6.4435	12.0814	105.7	29834587	0.6488	275.48	0.98352	1272318	0.00256767	0.191803		55408.8	3695	34170	0	19776	95.85	0	90.5	335.969	1.04621	1997.86	73456	53618	25.39	52.02	1.57742e+06	1552.79	684.251	3.21596e+06
47	2016	2013	1	1	1	0.13595	6.56478	12.5463	106.1	26100031	0.560692	276	0.981884	1302463	0.00460436	0.163835		56530	0	17322	0	12664	0	0	100	434.779	0.975841	2061.51	0	56986.7	25.5103	96.774	2.0726e+06	1150.94	754.566	2.93708e+06
47	2017	2013	1	1	1	0.174513	6.47048	13.0062	0	4.04647e+07	0.640833	280.01	1.16886	1.59119e+06	0.00318604	0.18676		106036	1604.65	18764.8	617858	17381.9	66.1415	0	97.4502	442.231	0.99278	1933.03	61342.5	62443.1	25.8172	87.2826	2.35703e+06	2089.45	819.065	3.19341e+06
47	2018	2013	1	1	1	0.166842	6.48695	13.5142	0	4.23182e+07	0.617838	280.419	1.22231	1.67039e+06	0.00205342	0.18718		109670	849.127	14214.9	472619	15477.5	63.9911	0	100.323	450.939	0.987957	1925.76	65990.7	65549	25.9827	87.3575	2.60912e+06	2096.4	879.619	3.49458e+06
47	2019	2013	1	1	1	0.159171	6.50343	14.0222	0	4.41717e+07	0.594844	280.827	1.27577	1.74959e+06	0.000920808	0.187599		113304	93.6	9665.07	327379	13573.1	61.8407	0	103.195	459.648	0.983134	1918.49	70639	68654.8	26.1482	87.4324	2.86121e+06	2103.36	940.173	3.79576e+06
48	2000	2013	1	0	0	0.0183254	6.5171	2.44059	2.40967e+06	178302	0.618325	297.531	0.210666	0	0.0132212	0.323067		0	5514.15	138863	0	125396	10.4023	144.934	0	0	1.02533	538.766	0	2686.2	26.6488	49.8071	0	224.377	0	190650
48	2001	2013	1	0	0	0.02535	6.54477	3.04988	2.23119e+06	871339	0.605098	299.487	0.26904	0	0.0125907	0.313781		0	5427.82	135755	0	120164	15.9409	134.894	0	0	1.02512	553.102	0	5613.1	26.1991	51.4794	0	233.459	26.5181	193488
48	2002	2013	1	0	0	0.0323746	6.57244	3.65917	2.0527e+06	1.56438e+06	0.59187	301.444	0.327415	1756	0.0119602	0.304496		0	5341.49	132648	61722.2	114933	21.4795	124.853	0	0	1.02491	567.438	0	8539.99	25.7495	53.1517	0	242.54	55.9954	196326
48	2003	2013	1	0	0	0.0393992	6.60012	4.26847	1.87421e+06	2.25741e+06	0.578642	303.401	0.385789	76527.2	0.0113297	0.29521		0	5255.16	129541	348346	109701	27.0182	114.812	0	1.71316	1.0247	581.774	281.455	11466.9	25.2998	54.824	0	251.622	85.4728	199164
48	2004	2013	1	0	0	0.0464239	6.62779	4.87776	1.69573e+06	2.95045e+06	0.565415	305.357	0.444164	151298	0.0106992	0.285924		0	5168.84	126434	634969	104470	32.5568	104.771	0	45.5788	1.02449	596.11	1940.32	14393.8	24.8501	56.4963	0	260.703	114.95	202002
48	2005	2013	1	0	0	0.0534485	6.65546	5.48705	1.51724e+06	3.64349e+06	0.552187	307.314	0.502539	226070	0.0100687	0.276639		0	5082.51	123327	921592	99238.3	38.0955	94.7307	0	89.4444	1.02429	610.446	3599.18	17320.7	24.4004	58.1685	0	269.785	144.427	204840
48	2006	2013	1	0	0	0.0718695	6.70588	6.00934	111.8	4059573	0.522222	305.85	0.461991	260900	0.00943823	0.267353		16005.9	4207	112414	415374	93415	41	67.59	0	177.123	1.01976	702.824	3110	20247.6	23.9507	59.8408	0	278.867	173.905	207678
48	2007	2013	1	0	0	0.07076	6.71566	6.42968	4908465	4908465	0.524604	309.42	0.465419	375612	0.00880773	0.258067		21479.4	4243	102202	328199	83320	42.16	72.64	0	195.502	1.01407	692.853	6421	22449.7	23.42	59.9182	0	257.498	205.517	204160
48	2008	2013	1	0	0	0.074303	6.72419	7.35567	108.5	5696268	0.529153	312	0.469391	450383	0.00817724	0.248782		27653.3	4445	101229	392072	83262	57.44	77.58	0	193.936	0.99055	652.561	9201	23968.8	25.15	62.9208	0	284.652	224.516	155304
48	2009	2013	1	0	0	0.0841053	6.83815	7.94947	105.4	5962587	0.476874	315.6	0.994297	525154	0.00754674	0.239496		43945.7	4663	98816	380337	80659	68.36	81.69	79	242.986	1.05452	502.738	9170	26790	21.32	60.5776	0	270.406	267.004	126670
48	2010	2013	1	0	0	0.0771264	6.81781	8.90717	113.9	6959095	0.472013	317.51	0.997008	551766	0.00674223	0.250284		54248.9	4832	97416	431046	77185	68.94	79.85	48.47	246.178	1.05242	648.647	15700	31696.2	21.27	68.2992	0	311.923	295.33	353759
48	2011	2013	1	0	0	0.0819049	6.75946	9.58951	113	8435722	0.493213	318.9	0.997805	646407	0.00625797	0.200941		66491.1	5891	143447	7826279	66212	62.2	0	44.91	310.095	1.03996	647.042	10635	38316.1	20.1	72.3517	1.47787e+06	373.767	322.414	243262
48	2012	2013	1	0	0	0.0964857	6.76925	9.64066	110.1	9313878	0.493129	319.4	0.999061	803046	0.00556668	0.237328		83178.8	5985	135097	7288138	62421	78.69	0	52.69	420	1.02146	710.964	21015	41039.7	21.57	73.436	1.5881e+06	401.981	348.542	270804
48	2013	2013	1	1	1	0.110417	6.82706	10.0355	108.9	9674311	0.455786	337.5	0.997333	945719	0.00494366	0.170515		103627	5387	128026	5981599	58068	90.86	0	55.82	499.2	0.978047	793.769	16455	42793.6	22.68	73.1997	1.94197e+06	377.979	379.263	245696
48	2014	2013	1	1	1	0.120609	6.88045	10.8727	104.9	10017256	0.444729	339.2	0.997347	1049451	0.00582313	0.174477		107241	4907	115853	6011611	58038	91.34	0	92	517.6	1.03525	815.334	18159	45662.2	20.1813	72.1743	1.80409e+06	362.356	406.03	240702
48	2015	2013	1	1	1	0.115691	6.95508	11.5754	103.1	10533703	0.417722	316.22	1.00414	923963	0.0026867	0.193202		114535	3726	95973	0	58299	91.61	0	67.02	546.4	1.05473	741.957	19100	47129.1	19.5598	72.8476	2.33281e+06	352.961	446.588	206674
48	2016	2013	1	1	1	0.148286	7.04354	12.2059	104.5	10257962	0.371586	318	0.996855	889263	0.00315298	0.189728		121282	1924	21044	0	25462	92	0	75.23	530	0.992606	752.393	20110	43609.6	19.5229	74.6595	2.24842e+06	294.627	465.095	185846
48	2017	2013	1	1	1	0.137744	6.98754	12.7986	0	1.19599e+07	0.393455	330.795	1.20303	1.12332e+06	0.00250278	0.165211		139189	4046.58	86040.1	4.36107e+06	36460.1	104.559	0	94.7267	615.832	1.02178	782.478	23505.5	52443.4	19.0041	78.2361	2.85673e+06	378.763	498.155	238897
48	2018	2013	1	1	1	0.144768	7.01521	13.4079	0	1.2653e+07	0.380227	332.752	1.26141	1.1981e+06	0.00187229	0.155925		150877	3960.25	82932.9	4.6477e+06	31228.6	110.098	0	102.709	659.698	1.02158	796.814	25164.4	55370.3	18.5544	79.9084	3.16898e+06	387.845	527.633	241735
48	2019	2013	1	1	1	0.151793	7.04289	14.0172	0	1.3346e+07	0.367	334.708	1.31978	1.27287e+06	0.00124179	0.14664		162565	3873.93	79825.7	4.93432e+06	25997	115.636	0	110.692	703.563	1.02137	811.15	26823.3	58297.2	18.1047	81.5807	3.48124e+06	396.926	557.11	244573
49	2000	2015	1	0	0	0.230664	6.13042	1.06668	4.78872e+06	34760.5	0.25354	416.978	0.037318	15900	0.0091916	0.200747		0	10271.1	90572.5	1.26821e+06	13196.5	79.549	103.925	46.2109	0	1.05181	448.747	0	1074.79	8.81297	16.3446	0	145.66	0	4.6972e+06
49	2001	2015	1	0	0	0.234132	6.15394	1.63562	4.43401e+06	130703	0.244873	419.543	0.107842	15900	0.00963246	0.199367		0	10003.1	87505.6	1.27285e+06	15020.2	79.4294	96.8013	49.0163	0	1.04879	477.581	3972.74	3869.65	10.3149	23.6229	0	199.72	0	4.87613e+06
49	2002	2015	1	0	0	0.2376	6.17747	2.20455	4.07929e+06	226645	0.236205	422.107	0.178366	15900	0.0100733	0.197988		0	9735.21	84438.6	1.2775e+06	16844	79.3098	89.6775	51.8216	0	1.04577	506.414	10872.8	6664.52	11.8167	30.9011	0	253.781	0	5.05507e+06
49	2003	2015	1	0	0	0.241067	6.20099	2.77348	3.72458e+06	322587	0.227537	424.672	0.248891	15900	0.0105142	0.196608		0	9467.28	81371.7	1.28215e+06	18667.7	79.1902	82.5536	54.627	0	1.04276	535.248	17772.9	9459.38	13.3186	38.1793	0	307.842	64.1668	5.23401e+06
49	2004	2015	1	0	0	0.244535	6.22451	3.34242	3.36987e+06	418529	0.21887	427.236	0.319415	15900	0.0109551	0.195229		0	9199.35	78304.8	1.2868e+06	20491.4	79.0706	75.4298	57.4323	48.3346	1.03974	564.082	24673	12254.2	14.8205	45.4575	0	361.902	136.808	5.41295e+06
49	2005	2015	1	0	0	0.248003	6.24803	3.91135	3.01516e+06	514471	0.210202	429.801	0.389939	15900	0.0113959	0.193849		9061.56	8931.41	75237.8	1.29144e+06	22315.1	78.951	68.306	60.2376	121.175	1.03672	592.915	31573.1	15049.1	16.3224	52.7358	0	415.963	209.449	5.59189e+06
49	2006	2015	1	0	0	0.253169	6.29239	4.13099	113.307	505000	0.154455	417.797	0.347571	15900	0.0118368	0.192469		35061.5	7984.18	69062.6	797507	28520.8	76.1273	45.0736	59.8051	245.178	1.02355	581.313	36324	17844	17.8242	60.014	0	470.024	282.091	5.77083e+06
49	2007	2015	1	0	0	0.250735	6.30615	5.08577	9.75467e+06	590996	0.166	422.501	0.330949	15900	0.0122776	0.19109		43879.3	8517.05	67749.6	840498	24525.4	77.0793	50.0784	65.4194	276.387	1.05981	670.163	43462.3	21081	20.34	71.5942	0	480.548	379.017	5.80806e+06
49	2008	2015	1	0	0	0.260135	6.30996	5.42795	112.221	697000	0.176471	427.241	0.335398	15900	0.0127185	0.18971		54856.6	8134.07	63771.2	1.00161e+06	21683.4	78.7751	56.2903	69.1482	334.449	1.05794	717.338	52754.7	23168.2	20.9601	74.9442	0	548.718	422.795	5.88064e+06
49	2009	2015	1	0	0	0.265596	6.36275	6.36117	111.902	805214	0.198773	430.016	0.999679	15900	0.0131594	0.188331		72444.9	7705.22	58580	1.03232e+06	18974.5	78.8716	59.3137	71.8611	404.53	1.04164	694.423	55218.9	26222.7	21.7966	79.7971	0	597.015	500.241	5.44026e+06
49	2010	2015	1	0	0	0.261458	6.363	6.75953	113.432	992165	0.237159	435.911	0.99299	15900	0.0130497	0.175949		89042.4	7935.92	59520	1.22768e+06	18776.1	82.141	70.4389	77.0939	453.781	0.997452	741.85	64029.4	28720.6	22.5665	84.324	0	703.665	568.741	7.03306e+06
49	2011	2015	1	0	0	0.26709	6.36238	7.48563	112.374	1476777	0.202349	550.873	0.990383	15900	0.0141463	0.184687		99551.2	7734.08	65414.5	2.60249e+06	51294.5	76.5802	0	79.3297	537.299	0.997879	743.569	75882.7	32145	24.2132	93.1664	2.18593e+06	806.969	639.637	7.18408e+06
49	2012	2015	1	0	0	0.266736	6.37823	8.31015	110.769	1623209	0.19895	441.512	0.990127	15900	0.0146282	0.201541		121777	7274.26	59491.8	2.26928e+06	48979.9	78.3541	0	83.5111	602.098	0.96588	791.278	86874.7	34629.8	26.4125	102.345	2.49915e+06	862.677	693.859	7.25244e+06
49	2013	2015	1	0	0	0.28564	6.40233	8.79907	109.596	1284000	0.1	441.241	0.992699	15900	0.0154208	0.186375		143483	7086.1	53915.9	2.3351e+06	38751.7	81.4615	0	74.6039	696.352	0.97229	852.035	95421	37252.1	30.2453	116.211	2.84314e+06	902.384	777.188	7.44149e+06
49	2014	2015	1	0	0	0.276394	6.45332	9.07169	108.165	1351000	0.095	445.286	0.990786	15900	0.0162252	0.178112		162107	6782.45	55073	2.40613e+06	43354.9	82.5167	0	89.8465	758.307	1.03141	880.639	100278	39517.6	30.7268	120.152	2.92794e+06	922.575	861.239	7.5993e+06
49	2015	2015	1	1	1	0.293633	6.50189	9.49004	107.591	1438000	0.092	444.56	0.99673	15900	0.0147798	0.177048		179568	6572.47	48701.5	0	48312.2	80.1238	0	90.4455	819.73	1.0099	858.07	93665.4	43138.7	32.28	128.96	3.37529e+06	917.443	944.597	7.16127e+06
49	2016	2015	1	1	1	0.276313	6.54838	9.65262	107.104	1228000	0.119	440.133	0.97661	15900	0.0162098	0.175976		191845	4836.31	23918.7	0	22658.6	68.5373	0	86.7022	1012.29	1.04708	894.418	98799.9	46281.5	31.3048	128.947	3.58588e+06	931.577	1028.87	6.74937e+06
49	2017	2015	1	1	1	0.289615	6.53029	10.7386	0	1.66578e+06	0.10619	460.576	1.23623	15900	0.0166863	0.177294		207959	5716.24	38434.7	1.34721e+06	44199.8	77.5159	0	93.9017	995.261	1.00052	938.92	114374	48587.5	34.3449	140.074	4.38781e+06	1064.69	1081.15	7.73916e+06
49	2018	2015	1	1	1	0.293083	6.55382	11.3075	0	1.76172e+06	0.0975224	463.14	1.30675	15900	0.0171271	0.175915		224534	5448.31	35367.7	1.35186e+06	46023.5	77.3963	0	96.7071	1068.1	0.997505	967.754	121274	51382.3	35.8468	147.353	4.86891e+06	1118.75	1153.79	7.9181e+06
49	2019	2015	1	1	1	0.296551	6.57734	11.8764	0	1.85766e+06	0.0888548	465.705	1.37728	15900	0.017568	0.174535		241109	5180.38	32300.8	1.35651e+06	47847.2	77.2767	0	99.5124	1140.94	0.994488	996.588	128175	54177.2	37.3487	154.631	5.35002e+06	1172.81	1226.43	8.09704e+06
50	2000	2015	1	0	0	0.318158	6.26569	2.59829	2.27801e+06	1.16991e+06	0.544852	246.569	0.141923	271915	0.00840016	0.137939		7568.75	6099.16	51784.7	513622	9754.89	27.53	1.74109	0	0	0.984004	0	26911.2	10887.6	9.6763	20.3141	0	248.026	68.2322	696648
50	2001	2015	1	0	0	0.312616	6.27699	3.21927	2.10927e+06	1.76767e+06	0.536893	246.046	0.205575	324811	0.00832386	0.138305		12073.2	5947.82	50025.3	513026	10988.5	31.2182	1.65818	0	0	0.986818	0	29484	12074.8	10.0802	22.3722	0	254.697	86.3448	806795
50	2002	2015	1	0	0	0.307075	6.28829	3.84024	1.94054e+06	2.36542e+06	0.528933	245.523	0.269227	377706	0.00824755	0.138671		16577.7	5796.47	48265.8	512431	12222.2	34.9064	1.57527	0	0	0.989632	48.9958	32056.8	13261.9	10.4842	24.4303	0	261.367	104.457	916943
50	2003	2015	1	0	0	0.301533	6.29958	4.46121	1.77181e+06	2.96317e+06	0.520973	245	0.332879	430601	0.00817125	0.139037		21082.2	5645.13	46506.4	511835	13455.9	38.5945	1.49236	0	0	0.992446	98.206	34629.7	14449	10.8881	26.4884	0	268.038	122.57	1.02709e+06
50	2004	2015	1	0	0	0.295992	6.31088	5.08219	1.60307e+06	3.56092e+06	0.513014	244.477	0.396531	483497	0.00809494	0.139403		25586.6	5493.78	44746.9	511240	14689.5	42.2827	1.40945	1.23636	16.5997	0.995261	147.416	37202.5	15636.1	11.292	28.5464	0	274.708	140.682	1.13724e+06
50	2005	2015	1	0	0	0.29045	6.32218	5.70316	1.43434e+06	4.15868e+06	0.505054	243.954	0.460183	536392	0.00801864	0.139769		30091.1	5342.44	42987.5	510644	15923.2	45.9709	1.32655	9.16364	56.663	0.998075	196.626	39775.3	16823.2	11.6959	30.6045	0	281.379	158.795	1.24739e+06
50	2006	2015	1	0	0	0.251391	6.38815	6.43664	113.8	3853331	0.438841	242.52	0.416543	218900	0.00794234	0.140135		16071.8	5300	36800	471686	27413	62	0	30	103	0.969013	315.336	11449	18010.4	12.0999	32.6626	0	288.049	176.908	1.35753e+06
50	2007	2015	1	0	0	0.236533	6.40367	6.95414	4640241	4640241	0.451054	242.8	0.417998	642183	0.00786603	0.140501		23366.3	3815	39629	404469	7946	57.28	0	30	147.811	1.01639	376.19	14700	18671.8	11	32.3059	0	209.321	188.347	1.54788e+06
50	2008	2015	1	0	0	0.23816	6.39393	7.44039	113.4	5638618	0.470931	242.7	0.419201	695078	0.00778973	0.140867		35200.5	4239	43546	349437	22318	49.11	0	30	251.2	1.02599	378.166	30606	20329.3	11.29	36.2415	0	250.729	208.719	1.23542e+06
50	2009	2015	1	0	0	0.396341	6.33992	7.89045	113.1	6075211	0.481975	242.64	1.00012	747974	0.00771343	0.141233		49202.2	5196	32900	463100	15900	60	0	34	265.1	1.03849	373.669	50003	22197.5	15.27	38.677	0	278.46	216.529	1.3066e+06
50	2010	2015	1	0	0	0.275003	6.31393	8.8536	114.2	7288908	0.511997	241.36	1.00265	802359	0.00643685	0.135468		67388.7	4070	27955	414370	1378	98	9.12	100	302	0.965089	414.157	70452	23811.5	12.91	37.8998	0	343.548	235.317	1.82498e+06
50	2011	2015	1	0	0	0.253693	6.32191	9.74854	112.2	8886676	0.514422	241.1	1.00041	1033212	0.0076966	0.144605		68959.9	5517	35078	599866	28736	27.41	0	0	0	0.996293	373.719	101688	23627	14.65	45.3318	1.37412e+06	399.647	271.968	2.18759e+06
50	2012	2015	1	0	0	0.302567	6.33146	10.2013	109.5	10153733	0.500821	240.5	1.00125	1279733	0.00711901	0.172964		87525	5518	33594	707944	30699	26.98	0	0	359.4	1.05151	361.185	120100	24368.9	16.43	44.1733	1.67647e+06	432.869	312.292	2.47048e+06
50	2013	2015	1	0	0	0.185919	6.36655	10.4133	108.7	11072964	0.494303	239.7	1.00167	1363630	0.00962653	0.122532		102952	5521	34200	909000	39000	96.2	0	100	384.697	1.04424	526.861	110012	26702.1	16.95	51.876	1.86115e+06	454.123	341.947	2.62892e+06
50	2014	2015	1	0	0	0.271389	6.41565	11.2476	105.8	10226035	0.449151	239.5	1.00042	1260005	0.00819622	0.129522		91259.7	4327	30544	1257913	45563	89.81	0	100	422.934	1.02519	661.431	72670	26490.7	16.3672	62.3082	1.67485e+06	373.651	340.461	2.29285e+06
50	2015	2015	1	1	1	0.203929	6.41011	12.1733	103	9849006	0.409077	238.15	1.00277	663424	0.00685678	0.132062		58350	3625	32721	0	28820	90.21	0	100	455.234	1.03711	758.904	25077	28710.6	14.9173	46.9824	1.71044e+06	323.223	341.158	2.06071e+06
50	2016	2015	1	1	1	0.214277	6.60436	12.3597	97.5	7512352	0.307682	238	1	684913	0.00592549	0.161727		28020.3	1650	9772	0	8803	92.1	0	100	576.095	0.99525	871.147	578	30485.8	13.4301	44.025	1.47074e+06	181.796	308.527	2.07803e+06
50	2017	2015	1	1	1	0.22395	6.45775	13.1548	0	1.13317e+07	0.409538	237.677	1.22401	1.17114e+06	0.007103	0.144161		84144.7	3526.29	21874.1	503498	30727	90.2291	0.331636	104.291	537.423	1.03184	787.149	70649.2	31068.7	16.5431	55.3016	2.29244e+06	361.425	376.146	2.56916e+06
50	2018	2015	1	1	1	0.218409	6.46905	13.7758	0	1.19295e+07	0.401578	237.154	1.28766	1.22403e+06	0.00702669	0.144527		88649.2	3374.95	20114.7	502903	31960.7	93.9173	0.248727	112.218	577.486	1.03466	836.359	73222.1	32255.8	16.947	57.3597	2.53165e+06	368.095	394.258	2.6793e+06
50	2019	2015	1	1	1	0.212867	6.48035	14.3968	0	1.25272e+07	0.393618	236.631	1.35131	1.27693e+06	0.00695039	0.144893		93153.7	3223.6	18355.3	502307	33194.3	97.6055	0.165818	120.145	617.549	1.03747	885.569	75794.9	33443	17.3509	59.4177	2.77086e+06	374.766	412.371	2.78945e+06
51	2000	2015	1	0	0	0.230664	6.13042	3.96643	4.78872e+06	0	0.202	113.4	1.0233	0	0	0.569603		0	4609	4589	0	0	0	0	1600	0	1.01122	448.747	0	1074.79	8.81297	16.3446	0	145.66	0	4.6972e+06
51	2001	2015	1	0	0	0.234132	6.15394	4.47466	4.43401e+06	0	0.197	112.25	1.02184	0	0	0.548934		0	4323	4328	0	0	0	0	1500	0	1.0111	477.581	3972.74	3869.65	10.3149	23.6229	0	199.72	0	4.87613e+06
51	2002	2015	1	0	0	0.2376	6.17747	4.9829	4.07929e+06	0	0.192	111.1	1.02038	0	0	0.528264		0	4037	4067	0	0	0	0	1400	0	1.01097	506.414	10872.8	6664.52	11.8167	30.9011	0	253.781	0	5.05507e+06
51	2003	2015	1	0	0	0.241067	6.20099	5.49113	3.72458e+06	0	0.187	109.95	1.01893	0	0	0.507595		0	3751	3806	0	0	0	0	1300	0	1.01084	535.248	17772.9	9459.38	13.3186	38.1793	0	307.842	64.1668	5.23401e+06
51	2004	2015	1	0	0	0.244535	6.22451	5.99937	3.36987e+06	0	0.182	108.8	1.01747	0	0	0.486926		0	3465	3545	0	0	0	0	1200	48.3346	1.01072	564.082	24673	12254.2	14.8205	45.4575	0	361.902	136.808	5.41295e+06
51	2005	2015	1	0	0	0.248003	6.24803	6.5076	3.01516e+06	0	0.177	107.65	1.01602	0	0	0.466256		0	3179	3284	0	0	0	0	1100	121.175	1.01059	592.915	31573.1	15049.1	16.3224	52.7358	0	415.963	209.449	5.59189e+06
51	2006	2015	1	0	0	0.253169	6.29239	7.02221	113.307	0	0.172	106.5	1.01456	0	0	0.445587		1702.22	2893	3023	0	0	0	0	1000	245.178	1.00994	581.313	36324	17844	17.8242	60.014	0	470.024	282.091	5.77083e+06
51	2007	2015	1	0	0	0.250735	6.30615	7.52191	9.75467e+06	233137	0.167	105.35	1.0131	0	0	0.424917		1690.98	2607	2762	0	0	0	0	900	276.387	1.01072	670.163	43462.3	21081	20.34	71.5942	0	480.548	379.017	5.80806e+06
51	2008	2015	1	0	0	0.260135	6.30996	8.04177	112.221	493659	0.162	104.2	1.01165	0	0	0.404248		1940.64	2321	2501	0	0	0	0	800	334.449	1.00909	717.338	52754.7	23168.2	20.9601	74.9442	0	548.718	422.795	5.88064e+06
51	2009	2015	1	0	0	0.265596	6.36275	8.53159	111.902	754181	0.157	103.05	1.01019	0	0	0.383579		2326.08	2035	2240	0	0	0	0	700	404.53	1.01127	694.423	55218.9	26222.7	21.7966	79.7971	0	597.015	500.241	5.44026e+06
51	2010	2015	1	0	0	0.261458	6.363	9.03657	113.432	1014703	0.152	101.9	1.00874	0	0	0.362909		3902.66	1749	1979	0	0	0	0	600	453.781	1.01065	741.85	64029.4	28720.6	22.5665	84.324	0	703.665	568.741	7.03306e+06
51	2011	2015	1	0	0	0.26709	6.36238	9.55678	112.374	1275225	0.147	100.75	1.00728	0	0	0.34224		5283.07	1463	1718	0	0	0	0	500	537.299	1.00888	743.569	75882.7	32145	24.2132	93.1664	2.18593e+06	806.969	639.637	7.18408e+06
51	2012	2015	1	0	0	0.266736	6.37823	10.0579	110.769	1535747	0.142	99.6	1.00582	37025	0	0.32157		7503.96	1177	1457	0	0	0	0	400	602.098	1.01075	791.278	86874.7	34629.8	26.4125	102.345	2.49915e+06	862.677	693.859	7.25244e+06
51	2013	2015	1	0	0	0.28564	6.40233	10.5796	109.596	1796269	0.137	98.45	1.00437	78127	0	0.300901		10025.5	891	1196	0	0	0	0	300	696.352	1.00836	852.035	95421	37252.1	30.2453	116.211	2.84314e+06	902.384	777.188	7.44149e+06
51	2014	2015	1	0	0	0.276394	6.45332	11.0888	108.165	2056791	0.132	97.3	1.00291	119229	0	0.280231		11480	605	935	0	0	0	0	200	758.307	1.00944	880.639	100278	39517.6	30.7268	120.152	2.92794e+06	922.575	861.239	7.5993e+06
51	2015	2015	1	1	1	0.293633	6.50189	11.6041	107.591	2317313	0.127	96.15	1.00146	160331	0.000909963	0.259562		13032.6	319	674	0	847	0	0	100	819.73	1.01161	858.07	93665.4	43138.7	32.28	128.96	3.37529e+06	917.443	944.597	7.16127e+06
51	2016	2015	1	1	1	0.276313	6.54838	12.0859	107.104	2577835	0.122	95	1	201433	0.0056011	0.238893		16358.2	33	413	0	1722	100	0	0	1012.29	1.00737	894.418	98799.9	46281.5	31.3048	128.947	3.58588e+06	931.577	1028.87	6.74937e+06
51	2017	2015	1	1	1	0.289615	6.53029	12.6064	0	2838357	0.117	93.85	0.998544	242535	0.0102922	0.218223		15909.5	0	152	0	2597	200	0	0	995.261	1.00906	938.92	114374	48587.5	34.3449	140.074	4.38781e+06	1064.69	1081.15	7.73916e+06
51	2018	2015	1	1	1	0.293083	6.55382	13.1147	0	3098879	0.112	92.7	0.997088	283637	0.0149834	0.197554		17421	0	0	0	3472	300	0	0	1068.1	1.00894	967.754	121274	51382.3	35.8468	147.353	4.86891e+06	1118.75	1153.79	7.9181e+06
51	2019	2015	1	1	1	0.296551	6.57734	13.6229	0	3359401	0.107	91.55	0.995632	324739	0.0196745	0.176884		18932.5	0	0	0	4347	400	0	0	1140.94	1.00881	996.588	128175	54177.2	37.3487	154.631	5.35002e+06	1172.81	1226.43	8.09704e+06
52	2000	2015	1	0	0	0.230664	6.13042	2.34407	4.78872e+06	0	0.321499	416.978	0.037318	53600	0.0091916	0.200747		0	10271.1	90572.5	1.26821e+06	13196.5	79.549	103.925	46.2109	0	0.96628	448.747	0	1074.79	8.81297	16.3446	0	145.66	0	4.6972e+06
52	2001	2015	1	0	0	0.234132	6.15394	2.98894	4.43401e+06	0	0.318957	419.543	0.107842	53600	0.00963246	0.199367		0	10003.1	87505.6	1.27285e+06	15020.2	79.4294	96.8013	49.0163	0	0.970779	477.581	3972.74	3869.65	10.3149	23.6229	0	199.72	0	4.87613e+06
52	2002	2015	1	0	0	0.2376	6.17747	3.63382	4.07929e+06	0	0.316415	422.107	0.178366	53600	0.0100733	0.197988		0	9735.21	84438.6	1.2775e+06	16844	79.3098	89.6775	51.8216	0	0.975278	506.414	10872.8	6664.52	11.8167	30.9011	0	253.781	0	5.05507e+06
52	2003	2015	1	0	0	0.241067	6.20099	4.27869	3.72458e+06	0	0.313873	424.672	0.248891	53600	0.0105142	0.196608		0	9467.28	81371.7	1.28215e+06	18667.7	79.1902	82.5536	54.627	0	0.979777	535.248	17772.9	9459.38	13.3186	38.1793	0	307.842	64.1668	5.23401e+06
52	2004	2015	1	0	0	0.244535	6.22451	4.92356	3.36987e+06	0	0.311331	427.236	0.319415	53600	0.0109551	0.195229		0	9199.35	78304.8	1.2868e+06	20491.4	79.0706	75.4298	57.4323	48.3346	0.984276	564.082	24673	12254.2	14.8205	45.4575	0	361.902	136.808	5.41295e+06
52	2005	2015	1	0	0	0.248003	6.24803	5.56843	3.01516e+06	233693	0.308789	429.801	0.389939	53600	0.0113959	0.193849		9061.56	8931.41	75237.8	1.29144e+06	22315.1	78.951	68.306	60.2376	121.175	0.988774	592.915	31573.1	15049.1	16.3224	52.7358	0	415.963	209.449	5.59189e+06
52	2006	2015	1	0	0	0.253169	6.29239	6.18303	113.307	703607	0.267	417.797	0.347571	53600	0.0118368	0.192469		35061.5	7984.18	69062.6	797507	28520.8	76.1273	45.0736	59.8051	245.178	1.02481	581.313	36324	17844	17.8242	60.014	0	470.024	282.091	5.77083e+06
52	2007	2015	1	0	0	0.250735	6.30615	6.74943	9.75467e+06	841651	0.283	422.501	0.330949	53600	0.0122776	0.19109		43879.3	8517.05	67749.6	840498	24525.4	77.0793	50.0784	65.4194	276.387	0.986583	670.163	43462.3	21081	20.34	71.5942	0	480.548	379.017	5.80806e+06
52	2008	2015	1	0	0	0.260135	6.30996	7.23996	112.221	996655	0.282	427.241	0.335398	53600	0.0127185	0.18971		54856.6	8134.07	63771.2	1.00161e+06	21683.4	78.7751	56.2903	69.1482	334.449	0.987429	717.338	52754.7	23168.2	20.9601	74.9442	0	548.718	422.795	5.88064e+06
52	2009	2015	1	0	0	0.265596	6.36275	8.23401	111.902	1157088	0.29961	430.016	0.999679	53600	0.0131594	0.188331		72444.9	7705.22	58580	1.03232e+06	18974.5	78.8716	59.3137	71.8611	404.53	1.05612	694.423	55218.9	26222.7	21.7966	79.7971	0	597.015	500.241	5.44026e+06
52	2010	2015	1	0	0	0.261458	6.363	9.0724	113.432	1406270	0.339	435.911	0.99299	53600	0.0130497	0.175949		89042.4	7935.92	59520	1.22768e+06	18776.1	82.141	70.4389	77.0939	453.781	0.968548	741.85	64029.4	28720.6	22.5665	84.324	0	703.665	568.741	7.03306e+06
52	2011	2015	1	0	0	0.26709	6.36238	9.85498	112.374	1723200	0.347	550.873	0.990383	53600	0.0141463	0.184687		99551.2	7734.08	65414.5	2.60249e+06	51294.5	76.5802	0	79.3297	537.299	0.960692	743.569	75882.7	32145	24.2132	93.1664	2.18593e+06	806.969	639.637	7.18408e+06
52	2012	2015	1	0	0	0.266736	6.37823	9.91347	110.769	2010000	0.336	441.512	0.990127	53600	0.0146282	0.201541		121777	7274.26	59491.8	2.26928e+06	48979.9	78.3541	0	83.5111	602.098	1.01661	791.278	86874.7	34629.8	26.4125	102.345	2.49915e+06	862.677	693.859	7.25244e+06
52	2013	2015	1	0	0	0.28564	6.40233	10.5155	109.596	2309000	0.324299	441.241	0.992699	53600	0.0154208	0.186375		143483	7086.1	53915.9	2.3351e+06	38751.7	81.4615	0	74.6039	696.352	1.0561	852.035	95421	37252.1	30.2453	116.211	2.84314e+06	902.384	777.188	7.44149e+06
52	2014	2015	1	0	0	0.276394	6.45332	11.4193	108.165	2742000	0.261	445.286	0.990786	53600	0.0162252	0.178112		162107	6782.45	55073	2.40613e+06	43354.9	82.5167	0	89.8465	758.307	1.03738	880.639	100278	39517.6	30.7268	120.152	2.92794e+06	922.575	861.239	7.5993e+06
52	2015	2015	1	1	1	0.293633	6.50189	12.2545	107.591	2923200	0.246	444.56	0.99673	53600	0.0147798	0.177048		179568	6572.47	48701.5	0	48312.2	80.1238	0	90.4455	819.73	1.02843	858.07	93665.4	43138.7	32.28	128.96	3.37529e+06	917.443	944.597	7.16127e+06
52	2016	2015	1	1	1	0.276313	6.54838	12.3778	107.104	3235500	0.244	440.133	0.97661	53600	0.0162098	0.175976		191845	4836.31	23918.7	0	22658.6	68.5373	0	86.7022	1012.29	1.05073	894.418	98799.9	46281.5	31.3048	128.947	3.58588e+06	931.577	1028.87	6.74937e+06
52	2017	2015	1	1	1	0.289615	6.53029	13.3069	0	3.41143e+06	0.278285	460.576	1.23623	53600	0.0166863	0.177294		207959	5716.24	38434.7	1.34721e+06	44199.8	77.5159	0	93.9017	995.261	1.04276	938.92	114374	48587.5	34.3449	140.074	4.38781e+06	1064.69	1081.15	7.73916e+06
52	2018	2015	1	1	1	0.293083	6.55382	13.9518	0	3.67624e+06	0.275743	463.14	1.30675	53600	0.0171271	0.175915		224534	5448.31	35367.7	1.35186e+06	46023.5	77.3963	0	96.7071	1068.1	1.04726	967.754	121274	51382.3	35.8468	147.353	4.86891e+06	1118.75	1153.79	7.9181e+06
52	2019	2015	1	1	1	0.296551	6.57734	14.5966	0	3.94105e+06	0.273201	465.705	1.37728	53600	0.017568	0.174535		241109	5180.38	32300.8	1.35651e+06	47847.2	77.2767	0	99.5124	1140.94	1.05176	996.588	128175	54177.2	37.3487	154.631	5.35002e+06	1172.81	1226.43	8.09704e+06
53	2000	2015	1	0	0	0.545142	5.81223	5.22185	3.1831e+06	0	0.605286	380.854	0	0	0.000902549	0.0146582		0	5701.02	25184.6	0	0	36.9769	78.1515	0	0	0.99651	324.715	4577.29	7917.3	5.64362	10.2017	0	0	0	947727
53	2001	2015	1	0	0	0.544397	5.84107	5.67499	2.94733e+06	0	0.598159	381.624	0	0	0.00172456	0.0244587		0	5702.18	24692.9	27567.6	0	40.6918	72.8573	0	0	0.99845	322.851	5566.27	10586.1	6.2802	13.5325	0	50.0417	0	988131
53	2002	2015	1	0	0	0.543652	5.86991	6.12812	2.71155e+06	0	0.591033	382.393	0.0248062	0	0.00254658	0.0342593		0	5703.35	24201.2	66524.5	0	44.4067	67.563	0	0	1.00039	320.987	6555.25	13254.9	6.91678	16.8634	0	100.315	0	1.02854e+06
53	2003	2015	1	0	0	0.542907	5.89875	6.58125	2.47577e+06	1.01267e+06	0.583906	383.163	0.109597	0	0.00336859	0.0440598		0	5704.51	23709.5	105481	393.255	48.1216	62.2687	3.75891	0	1.00233	319.124	7544.24	15923.7	7.55336	20.1942	0	150.589	10.2248	1.06894e+06
53	2004	2015	1	0	0	0.542161	5.9276	7.03439	2.23999e+06	2.28047e+06	0.57678	383.933	0.194388	68289.2	0.00419061	0.0538604		0	5705.67	23217.8	144438	1647.65	51.8365	56.9745	12.407	0	1.00427	317.26	8533.22	18592.5	8.18995	23.525	0	200.863	41.4918	1.10934e+06
53	2005	2015	1	0	0	0.541416	5.95644	7.48752	2.00422e+06	3.54827e+06	0.569653	384.702	0.279179	146473	0.00501262	0.0636609		6499.58	5706.84	22726	183395	2902.05	55.5515	51.6802	21.0551	0	1.00621	315.396	9522.2	21261.4	8.82653	26.8559	0	251.137	72.7588	1.14975e+06
53	2006	2015	1	0	0	0.492503	6.03737	8.3373	113.3	5392036	0.540427	383.8	0.215894	217400	0.00583464	0.0734615		12343.8	6053	22061	54942	7965	47.5	34.92	50.8	73.916	1.00401	283.286	6075	23930.2	9.46311	30.1867	0	301.41	104.026	1.19015e+06
53	2007	2015	1	0	0	0.550114	6.01994	8.81373	6483972	6483972	0.5492	385.31	0.2226	302840	0.00665665	0.083262		16487.2	5395	20321	26978	5776	52.08	31.68	16.36	132.553	1.00863	310.567	10881	27018.6	10.75	38.6826	0	356.1	169.88	1.00842e+06
53	2008	2015	1	0	0	0.553954	6.02781	8.99047	111	6950411	0.551723	387.37	0.234324	381023	0.00747866	0.0930626		21888.8	4538	18042	107231	3891	65.94	41.97	29.22	155.027	1.01768	318.824	13876	28400.7	10.68	37.6607	0	362.091	172.021	1.22274e+06
53	2009	2015	1	0	0	0.531044	6.07722	9.13736	114.5	7798930	0.564065	388.4	0.998738	459207	0.00830068	0.102863		74760	5372	20016	196427	3959	73.89	44.65	32.99	218.539	1.01345	313.153	12150	32480.8	11.74	40.435	0	418.356	196.533	1.09741e+06
53	2010	2015	1	0	0	0.56671	6.08385	9.59875	115.1	9212679	0.542242	389.15	0.999024	457976	0.00415158	0.0729358		60126.4	5448	22641	334391	5332	81	65.84	74.45	305.636	1.04026	312.851	15133	36279.9	11.57	41.7427	0	490.364	217.365	1.37984e+06
53	2011	2015	1	0	0	0.518642	6.09747	9.62476	115	11374486	0.520454	390.5	0.998207	670907	0.0103776	0.13633		65005.8	6914	26740	1069314	13536	80.69	0	99.34	368.066	1.00274	312.173	19169	36587.7	11.76	38.19	1.33834e+06	595.97	242.203	1.62519e+06
53	2012	2015	1	0	0	0.580025	6.11472	9.79788	112.6	12802046	0.504787	391.5	0.998723	755322	0.0136743	0.169179		73089.9	6386	19389	935899	13795	99.99	0	99.62	0	0.980425	325.156	19346	39744.1	12.09	47.042	1.41868e+06	655.731	268.853	1.66169e+06
53	2013	2015	1	0	0	0.562331	6.16769	10.7523	110	13959445	0.549513	392	0.99949	804680	0.0133919	0.15029		80735.3	6638	16039	809035	10717	99.99	0	99.6	511	1.03342	312.981	20294	42036.5	14.3	56.3931	2.41143e+06	695.621	301.135	1.74225e+06
53	2014	2015	1	0	0	0.529612	6.20735	11.7344	108.5	15156490	0.519157	392.5	0.99949	835153	0.0183632	0.148125		89492.5	6506	20009	1054282	19847	99.98	0	100	670	1.04522	301.26	20700	43054.8	15.6824	56.8268	1.60319e+06	736.024	334.724	1.94049e+06
53	2015	2015	1	1	1	0.529159	6.2658	12.2872	107.9	16050640	0.492086	389.99	1.00323	886148	0.0119499	0.165857		98131.4	5411	18570	0	18409	94.8	0	100	740	1.04726	286.069	20251	47659.3	15.6615	63.1091	1.76062e+06	724.649	395.93	1.52444e+06
53	2016	2015	1	1	1	0.492298	6.3251	13.1952	107.8	17524542	0.462186	392	0.997449	1000653	0.0092126	0.151741		112508	4191	13705	0	11486	60.39	0	100	863	1.00324	270.027	12142	52823.9	15.4093	64.9812	1.78634e+06	744.254	461.3	921265
53	2017	2015	1	1	1	0.532473	6.30253	12.9251	0	1.87619e+07	0.484136	393.938	1.29667	1.08467e+06	0.0148768	0.181268		121604	5720.8	16825.4	650877	17954.9	100.13	0	124.832	814.308	1.02949	293.03	21390	53287.1	16.4655	66.8259	2.48959e+06	854.421	447.963	1.63459e+06
53	2018	2015	1	1	1	0.531728	6.33137	13.3782	0	2.00297e+07	0.477009	394.707	1.38146	1.16286e+06	0.0156988	0.191068		131196	5721.96	16333.7	689834	19209.3	103.845	0	133.48	888.848	1.03143	291.167	22379	55955.9	17.1021	70.1568	2.75463e+06	904.695	479.23	1.675e+06
53	2019	2015	1	1	1	0.530983	6.36021	13.8314	0	2.12974e+07	0.469883	395.477	1.46625	1.24104e+06	0.0165208	0.200869		140788	5723.13	15842	728791	20463.7	107.56	0	142.128	963.388	1.03337	289.303	23367.9	58624.7	17.7387	73.4876	3.01968e+06	954.969	510.497	1.7154e+06
54	2000	2015	1	0	0	0.152382	6.00369	2.42407	5.79682e+06	0	0.610835	531.898	0	0	0.00202471	0.249829		0	27483.9	197387	3.8158e+06	35587.3	102.046	122.651	66.108	0	0.982657	94.7708	12623.6	0	7.2003	13.1707	0	316.094	0	145943
54	2001	2015	1	0	0	0.165227	6.03782	2.92141	5.36743e+06	0	0.603863	535.19	0	0	0.00315612	0.246322		0	26143.5	188266	3.64659e+06	35182.7	101.599	114.288	67.32	0	0.984434	130.919	12856.1	0	8.72012	19.3628	0	369.353	0	252744
54	2002	2015	1	0	0	0.178073	6.07196	3.41875	4.93804e+06	1.62788e+06	0.596892	538.482	0	0	0.00428753	0.242815		0	24803.2	179146	3.47738e+06	34778.2	101.153	105.926	68.532	0	0.986211	167.068	13088.6	0	10.2399	25.5548	0	422.612	0	359544
54	2003	2015	1	0	0	0.190919	6.10609	3.91609	4.50866e+06	3.63296e+06	0.58992	541.773	0	0	0.00541894	0.239308		0	23462.8	170025	3.30817e+06	34373.7	100.706	97.5631	69.744	0	0.987988	203.217	13321.1	2156.07	11.7598	31.7469	0	475.871	54.6233	466345
54	2004	2015	1	0	0	0.203764	6.14022	4.41343	4.07927e+06	5.63803e+06	0.582949	545.065	0.0782749	0	0.00655035	0.235801		0	22122.4	160905	3.13897e+06	33969.1	100.26	89.2005	70.956	0	0.989766	239.365	13553.6	5180.52	13.2796	37.9389	0	529.129	123.562	573145
54	2005	2015	1	0	0	0.21661	6.17435	4.91077	3.64989e+06	7.6431e+06	0.575977	548.357	0.174316	64854.6	0.00768175	0.232294		16683	20782.1	151784	2.96976e+06	33564.6	99.8133	80.838	72.168	0	0.991543	275.514	13786.1	8204.97	14.7994	44.131	0	582.388	192.502	679946
54	2006	2015	1	0	0	0.306226	6.2232	5.18384	114.7	10033800	0.557615	557.85	0.278211	357300	0.00881316	0.228787		56688.6	17050	151179	1809903	39040	96.81	53.32	71.82	100.474	1.00259	321.048	10049	11229.4	16.3192	50.323	0	635.647	261.441	786747
54	2007	2015	1	0	0	0.261204	6.25527	5.828	11808200	11808200	0.555038	561.67	0	401562	0.00994457	0.22528		60429.3	18405	138097	1660230	37293	98.55	53.32	87.24	168.998	0.997466	388.866	13584	15776.2	19.91	76.2922	0	655.355	366.645	792246
54	2008	2015	1	0	0	0.227458	6.31309	6.57042	112	14009100	0.559215	564.19	0	569916	0.011076	0.221773		73198.1	18195	123948	2587451	36903	98.58	67.86	73.13	204.797	0.978074	409.353	16415	17551.7	19.71	49.8249	0	739.744	422.786	1.01505e+06
54	2009	2015	1	0	0	0.237884	6.28702	7.33076	112.2	14760842	0.549799	569.01	0.995765	738270	0.0122074	0.218266		92692.1	17977	106704	2619024	32281	99.97	73.63	70.12	250.991	1.00601	408.975	13877	20585.5	20.42	53.6933	0	772.722	449.316	933116
54	2010	2015	1	0	0	0.225792	6.31213	7.48024	112.3	16578200	0.54261	570.18	0.999141	729086	0.0129718	0.184668		114059	19335	103475	3011137	27590	99.98	89.16	79.2	337.5	0.96569	415.52	11841	22335	20.66	58.2528	0	828.079	504.234	1.21522e+06
54	2011	2015	1	0	0	0.214189	6.35773	7.51815	110.9	19507100	0.543289	506.5	0.997631	950634	0.0147725	0.236856		115366	7858	89760	3084014	20229	96.98	0	98.7	426.236	1.04177	435.017	19033	24803.6	20.8	58.7345	1.54011e+06	925.649	577.572	1.51294e+06
54	2012	2015	1	0	0	0.271451	6.40176	8.25062	109.8	22305600	0.541858	577.5	0.998788	1202354	0.0135927	0.213403		140162	8354	84228	2586383	19171	94.69	0	98.7	445.453	0.979376	480.877	21093	28498.3	23.21	108.803	2.06098e+06	1028.96	661.923	1.46047e+06
54	2013	2015	1	0	0	0.413544	6.41696	9.04744	109.6	24605900	0.529007	578.8	0.998963	1500169	0.0202841	0.226196		168661	9353	78214	1921635	16400	99.12	0	0	599.05	1.01517	540.449	21472	32192.1	30.53	128.107	2.21817e+06	1079.98	734.547	1.81805e+06
54	2014	2015	1	0	0	0.36523	6.50358	9.43974	108.7	25960800	0.515516	583.2	0.996228	1712588	0.0152875	0.191103		196134	7941	68658	2219795	38810	94.22	0	97.23	640.038	1.01962	675.534	15655	35142.7	31.3233	136.958	2.23908e+06	1062.41	829.063	1.75257e+06
54	2015	2015	1	1	1	0.359033	6.52856	9.84194	108	27509400	0.4936	587.27	0.996543	1827800	0.0222228	0.180505		223791	7930	69924	0	39637	98.69	0	98.68	706	1.05086	693.922	11875	38977.9	30.2875	88.5031	2.70998e+06	1089.27	889.78	1.58608e+06
54	2016	2015	1	1	1	0.348506	6.57128	10.3518	107.6	29329900	0.488079	593	0.994941	1835081	0.0179998	0.196937		253778	7740	53486	0	35157	90.89	0	99.02	1170.85	0.967643	646.903	12099	42776	29.9312	84.6238	2.60258e+06	1103.53	970.199	1.65575e+06
54	2017	2015	1	1	1	0.370757	6.58394	10.8789	0	3.1704e+07	0.492319	587.856	1.32681	2.0851e+06	0.0212587	0.19021		255128	4697.58	42338.2	939256	28710.1	94.4558	0	86.712	983.291	1.01287	709.298	16576.2	44498.4	33.0372	118.436	3.36255e+06	1221.49	1019.77	1.96155e+06
54	2018	2015	1	1	1	0.383602	6.61807	11.3762	0	3.3709e+07	0.485347	591.148	1.42285	2.25346e+06	0.0223901	0.186703		274998	3357.21	33217.7	770047	28305.6	94.0094	0	87.924	1070.65	1.01465	745.446	16808.7	47522.8	34.557	124.628	3.73082e+06	1274.75	1088.71	2.06835e+06
54	2019	2015	1	1	1	0.396448	6.6522	11.8735	0	3.57141e+07	0.478376	594.439	1.5189	2.42181e+06	0.0235215	0.183196		294868	2016.84	24097.3	600839	27901.1	93.5629	0	89.136	1158.01	1.01642	781.595	17041.3	50547.3	36.0768	130.82	4.09909e+06	1328.01	1157.65	2.17515e+06
55	2000	2015	1	0	0	0.230664	6.13042	7.43312	4.78872e+06	0	0.417212	416.978	0.037318	18200	0.0091916	0.200747		0	10271.1	90572.5	1.26821e+06	13196.5	79.549	103.925	46.2109	0	1.04928	448.747	0	1074.79	8.81297	16.3446	0	145.66	0	4.6972e+06
55	2001	2015	1	0	0	0.234132	6.15394	7.8108	4.43401e+06	0	0.414241	419.543	0.107842	18200	0.00963246	0.199367		0	10003.1	87505.6	1.27285e+06	15020.2	79.4294	96.8013	49.0163	0	1.04667	477.581	3972.74	3869.65	10.3149	23.6229	0	199.72	0	4.87613e+06
55	2002	2015	1	0	0	0.2376	6.17747	8.18849	4.07929e+06	0	0.41127	422.107	0.178366	18200	0.0100733	0.197988		0	9735.21	84438.6	1.2775e+06	16844	79.3098	89.6775	51.8216	0	1.04407	506.414	10872.8	6664.52	11.8167	30.9011	0	253.781	0	5.05507e+06
55	2003	2015	1	0	0	0.241067	6.20099	8.56618	3.72458e+06	0	0.4083	424.672	0.248891	18200	0.0105142	0.196608		0	9467.28	81371.7	1.28215e+06	18667.7	79.1902	82.5536	54.627	0	1.04146	535.248	17772.9	9459.38	13.3186	38.1793	0	307.842	64.1668	5.23401e+06
55	2004	2015	1	0	0	0.244535	6.22451	8.94386	3.36987e+06	0	0.405329	427.236	0.319415	18200	0.0109551	0.195229		0	9199.35	78304.8	1.2868e+06	20491.4	79.0706	75.4298	57.4323	48.3346	1.03886	564.082	24673	12254.2	14.8205	45.4575	0	361.902	136.808	5.41295e+06
55	2005	2015	1	0	0	0.248003	6.24803	9.32155	3.01516e+06	117709	0.402359	429.801	0.389939	18200	0.0113959	0.193849		9061.56	8931.41	75237.8	1.29144e+06	22315.1	78.951	68.306	60.2376	121.175	1.03625	592.915	31573.1	15049.1	16.3224	52.7358	0	415.963	209.449	5.59189e+06
55	2006	2015	1	0	0	0.253169	6.29239	9.37041	113.307	348933	0.369	417.797	0.347571	18200	0.0118368	0.192469		35061.5	7984.18	69062.6	797507	28520.8	76.1273	45.0736	59.8051	245.178	1.04445	581.313	36324	17844	17.8242	60.014	0	470.024	282.091	5.77083e+06
55	2007	2015	1	0	0	0.250735	6.30615	9.56761	9.75467e+06	447518	0.402	422.501	0.330949	18200	0.0122776	0.19109		43879.3	8517.05	67749.6	840498	24525.4	77.0793	50.0784	65.4194	276.387	1.05492	670.163	43462.3	21081	20.34	71.5942	0	480.548	379.017	5.80806e+06
55	2008	2015	1	0	0	0.260135	6.30996	10.4539	112.221	556760	0.41	427.241	0.335398	18200	0.0127185	0.18971		54856.6	8134.07	63771.2	1.00161e+06	21683.4	78.7751	56.2903	69.1482	334.449	0.987532	717.338	52754.7	23168.2	20.9601	74.9442	0	548.718	422.795	5.88064e+06
55	2009	2015	1	0	0	0.265596	6.36275	11.021	111.902	636560	0.375884	430.016	0.999679	18200	0.0131594	0.188331		72444.9	7705.22	58580	1.03232e+06	18974.5	78.8716	59.3137	71.8611	404.53	0.987683	694.423	55218.9	26222.7	21.7966	79.7971	0	597.015	500.241	5.44026e+06
55	2010	2015	1	0	0	0.261458	6.363	11.6539	113.432	770976	0.385	435.911	0.99299	18200	0.0130497	0.175949		89042.4	7935.92	59520	1.22768e+06	18776.1	82.141	70.4389	77.0939	453.781	1.05718	741.85	64029.4	28720.6	22.5665	84.324	0	703.665	568.741	7.03306e+06
55	2011	2015	1	0	0	0.26709	6.36238	12.2011	112.374	963900	0.409	550.873	0.990383	18200	0.0141463	0.184687		99551.2	7734.08	65414.5	2.60249e+06	51294.5	76.5802	0	79.3297	537.299	1.01059	743.569	75882.7	32145	24.2132	93.1664	2.18593e+06	806.969	639.637	7.18408e+06
55	2012	2015	1	0	0	0.266736	6.37823	12.3022	110.769	1136300	0.402	441.512	0.990127	18200	0.0146282	0.201541		121777	7274.26	59491.8	2.26928e+06	48979.9	78.3541	0	83.5111	602.098	0.995668	791.278	86874.7	34629.8	26.4125	102.345	2.49915e+06	862.677	693.859	7.25244e+06
55	2013	2015	1	0	0	0.28564	6.40233	12.4264	109.596	1313000	0.414	441.241	0.992699	18200	0.0154208	0.186375		143483	7086.1	53915.9	2.3351e+06	38751.7	81.4615	0	74.6039	696.352	1.05427	852.035	95421	37252.1	30.2453	116.211	2.84314e+06	902.384	777.188	7.44149e+06
55	2014	2015	1	0	0	0.276394	6.45332	12.5806	108.165	1472100	0.351	445.286	0.990786	18200	0.0162252	0.178112		162107	6782.45	55073	2.40613e+06	43354.9	82.5167	0	89.8465	758.307	1.0545	880.639	100278	39517.6	30.7268	120.152	2.92794e+06	922.575	861.239	7.5993e+06
55	2015	2015	1	1	1	0.293633	6.50189	12.6074	107.591	1611400	0.35	444.56	0.99673	18200	0.0147798	0.177048		179568	6572.47	48701.5	0	48312.2	80.1238	0	90.4455	819.73	1.01728	858.07	93665.4	43138.7	32.28	128.96	3.37529e+06	917.443	944.597	7.16127e+06
55	2016	2015	1	1	1	0.276313	6.54838	13.2798	107.104	1768800	0.362	440.133	0.97661	18200	0.0162098	0.175976		191845	4836.31	23918.7	0	22658.6	68.5373	0	86.7022	1012.29	0.96274	894.418	98799.9	46281.5	31.3048	128.947	3.58588e+06	931.577	1028.87	6.74937e+06
55	2017	2015	1	1	1	0.289615	6.53029	13.8538	0	1.88706e+06	0.366711	460.576	1.23623	18200	0.0166863	0.177294		207959	5716.24	38434.7	1.34721e+06	44199.8	77.5159	0	93.9017	995.261	1.00499	938.92	114374	48587.5	34.3449	140.074	4.38781e+06	1064.69	1081.15	7.73916e+06
55	2018	2015	1	1	1	0.293083	6.55382	14.2315	0	2.03451e+06	0.363741	463.14	1.30675	18200	0.0171271	0.175915		224534	5448.31	35367.7	1.35186e+06	46023.5	77.3963	0	96.7071	1068.1	1.00238	967.754	121274	51382.3	35.8468	147.353	4.86891e+06	1118.75	1153.79	7.9181e+06
55	2019	2015	1	1	1	0.296551	6.57734	14.6092	0	2.18196e+06	0.36077	465.705	1.37728	18200	0.017568	0.174535		241109	5180.38	32300.8	1.35651e+06	47847.2	77.2767	0	99.5124	1140.94	0.999779	996.588	128175	54177.2	37.3487	154.631	5.35002e+06	1172.81	1226.43	8.09704e+06
56	2000	2015	1	0	0	0.742084	5.41657	2.26245	491474	0	0.222584	291.458	0	0	0.0111609	0.159169		0	486.755	0	0	0	75.3817	101.73	10.3994	0	0.960839	11.9628	0	12287.9	4.68224	0	0	0	0	0
56	2001	2015	1	0	0	0.735815	5.48126	2.7956	455077	0	0.224296	292.158	0	0	0.0107287	0.162071		0	469.727	0	0	213.545	76.0445	94.6736	14.5736	0	0.965313	14.1244	0	13444.1	5.09079	0	0	0	0	0
56	2002	2015	1	0	0	0.729546	5.54594	3.32875	418680	0	0.226008	292.858	0	0	0.0102965	0.164973		0	452.7	0	0	548.291	76.7074	87.6175	18.7479	0	0.969787	16.2861	0	14600.4	5.49934	0	0	0.639567	0	0
56	2003	2015	1	0	0	0.723278	5.61063	3.8619	382282	0	0.227721	293.558	0	0	0.00986425	0.167875		0	435.673	0	0	883.036	77.3702	80.5613	22.9222	0	0.974261	18.4478	0	15756.6	5.90789	0	0	5.11411	0	0
56	2004	2015	1	0	0	0.717009	5.67532	4.39505	345885	100598	0.229433	294.258	0.067295	0	0.00943203	0.170777		0	418.645	0	0	1217.78	78.033	73.5051	27.0965	0	0.978735	20.6095	1.32727	16912.8	6.31644	0	0	9.58866	0	821.921
56	2005	2015	1	0	0	0.710741	5.74	4.9282	309488	367148	0.231146	294.957	0.164347	0	0.00899981	0.173679		0	401.618	756.873	0	1552.53	78.6958	66.4489	31.2707	0	0.983209	22.7712	3.34545	18069.1	6.72498	3.94349	0	14.0632	7.52851	2506.98
56	2006	2015	1	0	0	0.68378	5.86709	5.4738	111.4	807964	0.187865	293.01	0.0984267	27000	0.00856759	0.176581		4283.31	305	1989	2963	1740	83.93	50.66	70	18.96	0.963792	26.9536	0	19225.3	7.13353	8.02276	0	18.5377	19.224	4192.03
56	2007	2015	1	0	0	0.744998	5.80976	6.0021	1001031	1001031	0.229216	296.12	0.10283	22851	0.00813537	0.179483		5527.91	721	2346	5693	1745	94.41	46.67	30	26	1.01036	43.2322	0	17976.2	7.95	16.9929	0	22.9436	39.0502	8767.41
56	2008	2015	1	0	0	0.731459	5.89889	6.46898	110.1	1056400	0.255348	297.81	0.106612	47928.1	0.00770315	0.182385		8052.4	187	2782	4527	1239	76.54	57.63	30	31	0.978121	43.0993	0	19723.8	7.96	17.86	0	22.8438	40.8694	5371.14
56	2009	2015	1	0	0	0.587397	6.13023	7.14255	110.3	1319394	0.235689	299.43	0.997295	73005.2	0.00727093	0.185287		12566.3	214	2992	5518	1329	72.24	53.04	30	34	0.996255	20.1372	0	21764.8	8.13	20.6888	0	29.5726	57.2882	8321.24
56	2010	2015	1	0	0	0.607656	6.08789	7.55791	111.8	1560193	0.251082	300.38	0.998435	72455	0.00649818	0.200848		19398.3	187	3707	3086	1599	75.36	57.23	30	37	1.03309	18.3793	0	25550.1	8.46	22.5341	0	36.0645	63.6406	8525.05
56	2011	2015	1	0	0	0.760519	6.11771	7.86233	112.5	1869420	0.277647	302.3	0.996692	100043	0.00637951	0.191426		27205.1	367	5575	0	9437	72.3	0	28.66	78.094	1.00583	18.7251	0	28570.3	8.98	24.0645	1.02804e+06	45.2436	71.8412	14059.9
56	2012	2015	1	0	0	0.623551	6.0413	8.6987	112.6	2232711	0.270229	296.3	0.923726	131115	0.00654668	0.206676		39229.1	298	6217	313517	7265	85.15	0	100	76.598	1.04979	21.1624	118	31357	9.37	25.9641	1.26559e+06	51.2412	81.1952	11093.3
56	2013	2015	1	0	0	0.777583	6.12882	9.58994	110.8	2522182	0.258308	300.1	0.993669	170465	0.00533867	0.167257		41331.4	279	8062	606754	2600	84.15	0	100	94.452	1.00631	45.6389	52	30672.3	10.29	34.8	1.46787e+06	53.5717	94.1272	17763.7
56	2014	2015	1	0	0	0.646199	6.37153	9.74236	108.9	2901643	0.243262	301.4	0.998009	215438	0.00554464	0.179684		50059.1	289	8092	677838	4231	85	0	63.27	127.424	1.03297	53.5774	0	33207	10.6976	40.4496	1.46632e+06	57.3075	118.84	22287.1
56	2015	2015	1	1	1	0.637528	6.4588	10.1287	108.1	3049178	0.218442	300.87	1.00086	243489	0.00430669	0.203462		55535	246	9447	0	4612	90.39	0	68.39	127	1.01913	50.9855	0	3977.29	10.8743	48.7841	1.58719e+06	53.3482	129.518	22862.6
56	2016	2015	1	1	1	0.60375	6.49724	10.7306	107.6	3310768	0.228531	303	0.9967	250964	0.00418002	0.228906		62119.8	201	7330	0	3374	89.93	0	69.16	245.5	1.01493	51.2639	0	43047.3	11.0936	52.4496	1.57688e+06	59.3409	139.122	15546.9
56	2017	2015	1	1	1	0.635518	6.51623	11.326	0	3.56574e+06	0.251694	303.355	1.32897	273622	0.00381318	0.208502		67351.2	197.291	9886.58	337913	5569.47	86.6496	0	81.362	189.81	1.0369	48.7115	27.5636	31943.9	11.6276	52.8948	2.08169e+06	67.7577	147.874	22727.7
56	2018	2015	1	1	1	0.629249	6.58091	11.8591	0	3.83229e+06	0.253407	304.055	1.42602	298699	0.00338096	0.211404		73647.5	180.264	10647.4	369688	5904.22	87.3125	0	85.5363	207.869	1.04137	50.8732	29.5818	33100.1	12.0361	56.9741	2.3076e+06	72.2323	159.57	24412.7
56	2019	2015	1	1	1	0.62298	6.6456	12.3923	0	4.09884e+06	0.255119	304.755	1.52308	323776	0.00294874	0.214306		79943.7	163.236	11408.2	401463	6238.96	87.9753	0	89.7105	225.928	1.04584	53.0349	31.6	34256.3	12.4447	61.0533	2.5335e+06	76.7068	171.265	26097.8
57	2000	2012	1	0	0	0	6.79709	2.12692	1.54731e+07	2.75917e+06	0.53496	618.489	0.162283	0	0.0224004	0.223989		28387.4	67000.2	151794	1.18096e+06	48832.3	100.262	120.611	21.6284	0	1.04667	3644.37	26456	33968.2	0	0	0	1173.74	341.78	6.01952e+07
57	2001	2012	1	0	0	0	6.81986	2.5858	1.43269e+07	6.78197e+06	0.536002	621.522	0.223681	0	0.02393	0.225243		36364.3	63829.8	147770	1.14237e+06	46447.8	99.1564	112.425	24.9118	0	1.04278	3697.96	54306.9	34600.9	0	0	0	1251.25	498.803	6.17446e+07
57	2002	2012	1	0	0	0	6.84263	3.04467	1.31808e+07	1.08048e+07	0.537044	624.555	0.285079	0	0.0254596	0.226497		44341.3	60659.5	143746	1.10378e+06	44063.3	98.0505	104.24	28.1953	136.815	1.03888	3751.56	82157.8	35233.6	0	0	0	1328.76	655.826	6.32939e+07
57	2003	2012	1	0	0	0	6.86541	3.50355	1.20346e+07	1.48276e+07	0.538086	627.587	0.346477	0	0.0269891	0.227751		52318.3	57489.1	139721	1.06518e+06	41678.8	96.9447	96.0553	31.4787	293.587	1.03498	3805.15	110009	35866.3	0	0	0	1406.28	812.85	6.48432e+07
57	2004	2012	1	0	0	0	6.88818	3.96242	1.08885e+07	1.88504e+07	0.539128	630.62	0.407875	275170	0.0285187	0.229005		60295.2	54318.8	135697	1.02659e+06	39294.3	95.8389	87.8702	34.7622	450.359	1.03108	3858.75	137860	36499	0	0	0	1483.79	969.873	6.63925e+07
57	2005	2012	1	0	0	0	6.91095	4.4213	9.74235e+06	2.28732e+07	0.54017	633.653	0.469274	703363	0.0300483	0.230259		68272.2	51148.4	131673	987996	36909.9	94.7331	79.6851	38.0456	607.131	1.02718	3912.34	165710	37131.7	0	0	0	1561.3	1126.9	6.79418e+07
57	2006	2012	1	0	0	0.06085	6.88305	5.11704	114.1	26265085	0.575978	168.31	0.418395	1289400	0.0315779	0.231513		70545.1	24134	138383	734773	23983	95.59	26.32	100	580.287	1.03856	3530.96	180789	37764.4	3.11095	0	0	1638.82	1283.92	6.94912e+07
57	2007	2012	1	0	0	0.069711	6.91279	5.45263	31519126	31519126	0.55922	171.26	0.430165	1.55975e+06	0.0331075	0.232767		84120.7	91260	119745	899289	37239	91.41	87.93	37.77	727.784	1.02966	4236.38	211759	35279.8	13.16	83.4156	0	1790.92	1349.02	81214522
57	2008	2012	1	0	0	0.0522249	6.99557	5.7134	110.4	37025344	0.516447	174.87	0.439183	1.98794e+06	0.0346371	0.234021		94434.3	33359	108222	794810	41612	94.19	63.95	27	963.744	0.97781	4642.36	322570	37305.9	13.34	97.4477	0	1845.32	1639.39	7.43854e+07
57	2009	2012	1	0	0	0.0108261	7.07942	5.74766	109.7	37639142	0.504018	178.73	0.989202	2.41614e+06	0.0361666	0.235275		109408	29962	94031	648502	30040	94.97	67.07	28.79	1180.2	0.979994	4077.27	259400	40501.7	13.26	97.4085	0	1733.8	1831.51	6.11505e+07
57	2010	2012	1	0	0	0.0344856	7.03024	6.71337	112.4	42464527	0.54469	181.77	0.991638	2778422	0.0275913	0.225724		111498	29992	99913	647084	29124	94.98	91.05	37.28	1539.2	1.0416	4180.23	273171	42879.5	14.31	97.2404	0	1989.36	1904.53	7.57569e+07
57	2011	2012	1	0	0	0.0606035	7.04923	7.0639	110	47353949	0.551922	5332.1	0.986834	3130639	0.0515374	0.236516		107931	28240	132444	1105984	11086	79.15	0	41.15	1907.16	1.01485	3889.43	305052	43581.5	16.54	102.17	3.07365e+06	2066.71	2053.47	7.62867e+07
57	2012	2012	1	1	1	0.038322	7.10093	7.84103	108.2	50101727	0.541553	187	0.994118	3563245	0.0480857	0.240667		118035	26909	118663	1247392	15095	78.05	0	54.43	2047.2	0.987736	4159.08	336938	50573	16.6	107.508	3.28236e+06	2022.46	2226.76	7.76582e+07
57	2013	2012	1	1	1	0.365079	7.13174	8.08857	108.5	54900207	0.543481	188.9	0.995236	4092897	0.0383006	0.255464		138394	23463	112132	621988	15543	78.94	0	67.55	2161.1	1.02585	4269.57	393775	35569.3	40.83	333.506	3.68932e+06	2089.86	2448.34	7.86545e+07
57	2014	2012	1	1	1	0.345429	7.10016	8.80016	107.8	58813173	0.553648	191.4	0.99373	4552119	0.0308142	0.259871		142711	28396	106710	1620960	17851	83.42	0	66.37	2048.6	0.968878	4713.22	452919	38718.8	39.5547	344.263	3.72291e+06	2272.89	2494.39	8.11951e+07
57	2015	2012	1	1	1	0.337499	7.1196	9.10892	108	62750737	0.554424	195.01	0.990718	5179682	0.0530482	0.225266		144652	20429	84940	0	14412	88.65	0	74.87	2017.4	1.01192	4452.92	531982	42693.7	40.3776	474.298	4.6627e+06	2344.26	2672.97	8.37112e+07
57	2016	2012	1	1	1	0.325749	7.12079	9.27331	107.5	68276868	0.56526	201	0.985075	5447543	0.0466173	0.238527		155746	17245	67608	0	12647	89.73	0	100	1852.7	0.964748	4421.6	392617	45339.1	41.4453	475.192	4.71322e+06	2495.86	2855.1	9.01111e+07
57	2017	2012	1	1	1	0.372122	7.18423	9.92779	0	7.11468e+07	0.552674	670.047	1.20605	5.84169e+06	0.0484033	0.245307		163996	13104.1	83380.3	524873	8295.96	81.4633	0	77.4471	2488.39	0.980385	4555.48	499921	44724	46.7726	491.656	5.81272e+06	2491.47	3011.18	8.65337e+07
57	2018	2012	1	1	1	0.408373	7.207	10.3867	0	7.51696e+07	0.553716	673.08	1.26745	6.26988e+06	0.0499329	0.246561		171973	9933.79	79356	486280	5911.47	80.3575	0	80.7305	2645.16	0.976486	4609.07	527772	45356.7	50.7418	540.822	6.44877e+06	2568.98	3168.2	8.8083e+07
57	2019	2012	1	1	1	0.444624	7.22978	10.8455	0	7.91924e+07	0.554758	676.113	1.32885	6.69807e+06	0.0514625	0.247815		179950	6763.44	75331.6	447686	3526.98	79.2516	0	84.014	2801.94	0.972586	4662.67	555623	45989.4	54.7111	589.988	7.08483e+06	2646.5	3325.22	8.96323e+07
58	2000	2015	1	0	0	0.079151	6.20194	1.75762	8.17272e+06	1.80302e+06	0.604852	218.419	0	0	0.0182526	0.208439		0	7964.76	121043	1.32884e+06	15193.5	84.493	129.261	104.136	0	0.981626	490.587	10264	7387.41	12.7494	34.3974	0	1012.73	0	0
58	2001	2015	1	0	0	0.0796384	6.2282	2.23978	7.56734e+06	4.02544e+06	0.593244	219.391	0	0	0.018022	0.207668		0	8011.09	115677	1.28726e+06	14458.2	85.2927	120.126	102.81	0	0.98538	557.395	10988.8	10447.1	13.0439	36.907	0	1067.98	0	0
58	2002	2015	1	0	0	0.0801258	6.25446	2.72193	6.96196e+06	6.24786e+06	0.581637	220.362	0	0	0.0177913	0.206896		0	8057.42	110311	1.24569e+06	13722.8	86.0925	110.992	101.484	0	0.989134	624.203	11713.6	13506.7	13.3384	39.4167	0	1123.23	0	0
58	2003	2015	1	0	0	0.0806132	6.28072	3.20408	6.35658e+06	8.47027e+06	0.570029	221.334	0.0521834	0	0.0175607	0.206124		0	8103.75	104944	1.20411e+06	12987.5	86.8922	101.858	100.157	0	0.992888	691.012	12438.4	16566.4	13.6328	41.9263	0	1178.49	32.0846	0
58	2004	2015	1	0	0	0.0811006	6.30698	3.68623	5.75121e+06	1.06927e+07	0.558422	222.305	0.141165	50501.9	0.01733	0.205352		0	8150.07	99578.1	1.16253e+06	12252.1	87.6919	92.7235	98.8309	31.8966	0.996642	757.82	13163.1	19626	13.9273	44.4359	0	1233.74	102.429	444942
58	2005	2015	1	0	0	0.081588	6.33324	4.16839	5.14583e+06	1.29151e+07	0.546815	223.277	0.230146	241045	0.0170994	0.204581		20845.4	8196.4	94211.8	1.12095e+06	11516.8	88.4916	83.5893	97.5045	77.0909	1.0004	824.628	13887.9	22685.7	14.2218	46.9456	0	1288.99	172.773	1.08374e+06
58	2006	2015	1	0	0	0.112055	6.35123	5.06319	114.7	14503100	0.5472	181.82	0.429876	481000	0.0168688	0.203809		60986.1	8953	110346	1148065	18186	90.83	76.68	94.63	161.436	1.03111	974.99	13933	25745.3	14.5163	49.4552	0	1344.24	243.117	1.72255e+06
58	2007	2015	1	0	0	0.0928609	6.4111	5.18097	16648004	16648004	0.524796	183.09	0	622132	0.0166381	0.203037		69860.4	9481	100414	749509	12193	91.68	77.87	100	220.549	0.997391	1025.7	15617	30132.6	13.93	49.0278	0	1269.24	334.958	2.01683e+06
58	2008	2015	1	0	0	0.0903307	6.41746	5.52004	112	20526200	0.507283	183.97	0	812676	0.0164075	0.202266		87380.6	9783	93460	993730	6394	91.98	73.91	91.99	230.008	1.00625	1044.24	17961	31798.6	14.62	47.797	0	1483.35	388.622	2.70151e+06
58	2009	2015	1	0	0	0.0832877	6.44473	5.95842	112.2	20589700	0.492513	184.59	0.998321	1.00322e+06	0.0161768	0.201494		109559	0	0	0	0	83.54	0	98.39	276.593	1.02969	997.359	16506	35109.1	15.67	50.4504	0	1447.33	439.563	2.57263e+06
58	2010	2015	1	0	0	0.0756196	6.46164	6.19773	112.3	23599400	0.481716	184.87	0.999243	1048821	0.0142293	0.176807		134898	10559	70995	1173165	5873	92.54	88.16	100	307.339	0.960412	1076.32	20975	37925.2	16.61	63.7798	0	1576.13	515.746	4.98618e+06
58	2011	2015	1	0	0	0.0341885	6.47663	7.07423	110.9	26763500	0.471523	656.6	0.995126	1352688	0.0120724	0.21395		157442	9701	59095	1387744	6793	92.97	0	100	401.576	1.05537	1141.97	14035	39834.5	16.09	73.3703	1.57037e+06	1672.5	578.538	5.76414e+06
58	2012	2015	1	0	0	0.0455454	6.49859	7.22314	109.8	30006600	0.467667	185.5	1.00108	1587051	0.0154594	0.227536		196300	10153	55457	1372440	5810	94.61	0	100	0	0.999235	1258.91	16232	42728.7	17.32	75.6431	1.77402e+06	1809.77	655.706	6.61003e+06
58	2013	2015	1	0	0	0.0906559	6.51391	8.05174	109.6	32502000	0.457076	187	0.995722	1837943	0.0216743	0.190255		233213	10111	52818	1338461	5636	98.5	0	0	472.052	1.04884	1391.61	19335	47136.3	16.56	67.3055	1.92695e+06	1873.92	725.676	6.75603e+06
58	2014	2015	1	0	0	0.0837107	6.57317	8.68789	108.7	34304900	0.448773	189.1	0.994183	2062350	0.0219108	0.192367		270820	8624	48312	1423289	7194	99.11	0	100	500.579	1.04902	1438.45	21510	49435	17	70.6543	1.96326e+06	1858.44	837.695	6.62369e+06
58	2015	2015	1	1	1	0.0863811	6.6054	9.22388	108	34506400	0.432792	190.62	0.996013	2200829	0.0103778	0.191921		308468	7819	47860	0	5156	96.69	0	100	538	1.02139	1480.62	22194	54121	16.7329	67.4655	2.06676e+06	1789.3	884.129	6.45146e+06
58	2016	2015	1	1	1	0.135001	6.64503	9.4931	107.6	34796000	0.417531	193	0.994819	2218659	0.011056	0.196013		247255	8034	43401	0	4916	93.74	0	100	722.691	1.05342	1650.09	22304	57513.6	16.8266	67.0878	2.10887e+06	1701.34	939.472	7.87704e+06
58	2017	2015	1	1	1	0.0874368	6.64837	9.95422	0	3.95841e+07	0.407526	234.934	1.29792	2.52757e+06	0.0143317	0.19532		320279	8752.33	29816.9	622028	2692.51	98.0884	0	81.5882	619.422	1.04545	1626.33	22585.2	59401.6	17.7556	77.0611	2.78262e+06	1952.02	1016.9	8.74936e+06
58	2018	2015	1	1	1	0.0879242	6.67463	10.4364	0	4.18065e+07	0.395918	235.906	1.3869	2.71811e+06	0.0141011	0.194549		345231	8798.65	24450.6	580451	1957.15	98.8881	0	80.2618	664.617	1.0492	1693.14	23310	62461.2	18.0501	79.5707	3.08109e+06	2007.27	1087.25	9.38816e+06
58	2019	2015	1	1	1	0.0884116	6.70089	10.9185	0	4.4029e+07	0.384311	236.877	1.47589	2.90865e+06	0.0138704	0.193777		370184	8844.98	19084.4	538874	1221.8	99.6878	0	78.9355	709.811	1.05295	1759.95	24034.7	65520.9	18.3446	82.0804	3.37957e+06	2062.53	1157.59	1.0027e+07
59	2000	2015	1	0	0	0.0153752	6.63662	0.524415	5.64997e+06	0	0.556962	134.972	0	0	0.0268553	0.185203		0	2939.33	375221	7.59217e+06	175463	119.179	109.091	90.8935	0	0.986522	0.960083	0	15200.9	0	0	0	0	0	303879
59	2001	2015	1	0	0	0.0186428	6.64698	1.10209	5.23146e+06	0	0.559124	136.532	0.0713886	0	0.0254143	0.179554		0	2917.27	360650	7.42365e+06	168639	114.437	101.715	91.1409	0	0.988379	33.2933	0	18148.3	0	0	0	0	0	313353
59	2002	2015	1	0	0	0.0219105	6.65734	1.67977	4.81295e+06	0	0.561286	138.092	0.145209	0	0.0239734	0.173905		0	2895.22	346080	7.25514e+06	161816	109.696	94.3382	91.3883	0	0.990235	65.6266	843.227	21095.6	0	0	0	138.384	0	322828
59	2003	2015	1	0	0	0.0251782	6.6677	2.25745	4.39444e+06	0	0.563447	139.652	0.21903	0	0.0225325	0.168256		4220.79	2873.16	331510	7.08662e+06	154993	104.954	86.9618	91.6356	0	0.992092	97.9598	14813.3	24042.9	1.25098	0	0	286.508	108.259	332303
59	2004	2015	1	0	0	0.0284458	6.67806	2.83512	3.97594e+06	2.03911e+06	0.565609	141.212	0.29285	256488	0.0210916	0.162607		28717.4	2851.11	316939	6.9181e+06	148170	100.212	79.5855	91.883	0	0.993948	130.293	28783.3	26990.2	2.58649	0	0	434.632	217.455	341778
59	2005	2015	1	0	0	0.0317135	6.68842	3.4128	3.55743e+06	5.88923e+06	0.567771	142.772	0.366671	655797	0.0196507	0.156959		53214.1	2829.05	302369	6.74958e+06	141347	95.4704	72.2091	92.1304	0.961018	0.995805	162.626	42753.4	29937.5	3.92201	5.87496	0	582.756	326.651	351252
59	2006	2015	1	0	0	0.024048	6.68156	3.7966	118	8000046	0.549497	141	0.324043	729100	0.0182098	0.15131		61666.9	3959	302700	1107057	164308	70.08	44.99	95.8	37.693	0.968532	73.0049	53788	32884.8	5.25753	11.9373	0	730.88	435.847	360727
59	2007	2015	1	0	0	0.016066	6.73639	4.77856	11509051	11509051	0.550089	143.99	0.321828	1.45441e+06	0.0167689	0.145661		88574.4	2336	250540	1193443	97011	89.5	46.24	95.8	68.266	0.994994	92.5699	69789	31583.1	7.94	27.5888	0	633.113	467.843	460939
59	2008	2015	1	0	0	0.0585216	6.71581	5.20917	117.8	16030184	0.581048	149.69	0.313247	1.85372e+06	0.015328	0.140012		108839	2934	243870	3812889	82631	75.74	53.47	95.8	68.752	1.01193	113.502	84233	34241.1	8.36	28.5438	0	879.617	579.751	566311
59	2009	2015	1	0	0	0.069244	6.75414	5.81014	116.9	21610000	0.58329	149.48	0.990701	2.25303e+06	0.0138871	0.134363		156241	2085	225500	3718100	37800	88.31	78.32	87.22	71.57	1.00766	178.691	100000	42617.3	9.09	31.0669	0	1198.68	798.774	290808
59	2010	2015	1	0	0	0.0749544	6.75362	6.32481	115	26432300	0.586945	152.38	0.990484	2390774	0.00895602	0.137562		189840	3377	225519	4566000	97957	78	84.44	85.08	92.522	1.02179	795.694	108000	48806.6	9.97	32.6356	0	1428.08	939.97	268390
59	2011	2015	1	0	0	0.0527801	6.73245	6.62909	114.3	32185400	0.600793	158.2	0.969027	3461762	0.0158758	0.109628		224342	2163	226268	41181441	168612	85.83	0	93.65	116.3	0.997599	791.245	127000	51791.5	10.75	35.4489	3.90081e+06	1688.9	1049.66	346929
59	2012	2015	1	0	0	0.0361532	6.73038	7.29566	111.5	36568000	0.605209	152.1	1.01972	3755121	0.00991778	0.122563		257058	1783	225666	0	260939	86.53	0	93.69	130	1.05531	337.594	153000	56550	11.22	37.6645	4.11378e+06	1883.94	1152.09	227090
59	2013	2015	1	0	0	0.019364	6.7423	8.17552	109	39558982	0.598936	154.3	0.992871	4400156	0.00768905	0.112779		299604	2041	212067	7419989	103541	36.73	0	95.13	178	1.0095	360.345	160000	56946.7	14.56	45.9736	4.30363e+06	1965.71	1235.42	583731
59	2014	2015	1	0	0	0.0230644	6.77673	8.56906	107.8	40554873	0.607325	156	0.994231	4300782	0.00433427	0.104301		239043	2388	195409	124340	0	42.37	0	95	186	1.00566	380.762	168500	50962.2	15.0509	48.6514	4.40676e+06	1916.63	1301.06	360763
59	2015	2015	1	1	1	0.162711	6.80865	9.5338	107.7	42261300	0.567895	157.32	0.995678	4458999	0.00641589	0.0945718		271917	2957	199358	0	45994	39.1	0	95.57	243	1.00864	412.4	173000	58862.8	22.7479	84.4012	4.63984e+06	1925.29	1385.57	355399
59	2016	2015	1	1	1	0.0276073	6.82454	9.54505	107.2	44179341	0.557134	159	0.993711	4510263	0.00367532	0.100963		305008	3641	57518	0	45699	45.03	0	97.02	257	0.994781	387.074	195000	58588.7	16.3401	80.8252	4.4171e+06	1935.68	1454.1	668024
59	2017	2015	1	1	1	0.0709254	6.81277	10.3449	0	5.20907e+07	0.593713	161.493	1.25252	5.4475e+06	0.00235981	0.0891709		347174	2564.4	127525	4.72737e+06	59469.7	38.5696	0	95.0987	262.512	1.01808	550.625	210394	65305.2	19.9482	78.6227	6.15788e+06	2360.24	1637	464950
59	2018	2015	1	1	1	0.0741931	6.82313	10.9226	0	5.59408e+07	0.595875	163.053	1.32634	5.84681e+06	0.000918903	0.083522		371670	2542.35	112954	4.55886e+06	52646.6	33.8279	0	95.3461	284.308	1.01994	582.958	224364	68252.5	21.2838	84.685	6.80873e+06	2508.37	1746.2	474424
59	2019	2015	1	1	1	0.0774607	6.83349	11.5003	0	5.97909e+07	0.598037	164.613	1.40016	6.24612e+06	0	0.077873		396167	2520.29	98383.9	4.39034e+06	45823.5	29.0862	0	95.5935	306.104	1.0218	615.292	238334	71199.8	22.6193	90.7473	7.45958e+06	2656.49	1855.39	483899
60	2000	2015	1	0	0	0.247926	6.15757	2.56524	1.02463e+06	0	0.490831	131.03	0.115723	0	0	0.120722		0	4140.16	51659.3	209000	0	91.3171	121.652	108.707	0	1.00199	264.863	0	0	4.33553	16.0644	0	0	0	0
60	2001	2015	1	0	0	0.268066	6.16633	3.14404	948735	0	0.497372	131.504	0.178447	0	0	0.123648		0	3978.36	50073.1	270766	1729.55	91.3364	113.243	107.055	0	1.00311	277.208	0	648.132	4.52193	17.1791	0	0	0	0
60	2002	2015	1	0	0	0.288207	6.17508	3.72283	872845	0	0.503913	131.977	0.241171	0	0	0.126575		0	3816.56	48486.9	332532	3988.74	91.3556	104.834	105.404	0	1.00424	289.554	0	2681.26	4.70834	18.2939	0	0	0	0
60	2003	2015	1	0	0	0.308347	6.18384	4.30162	796955	0	0.510454	132.451	0.303895	0	0	0.129501		0	3654.76	46900.6	394297	6247.93	91.3749	96.4245	103.753	0	1.00536	301.899	0	4714.39	4.89474	19.4086	0	11.073	2.75889	14623.9
60	2004	2015	1	0	0	0.328487	6.1926	4.88041	721065	162348	0.516995	132.925	0.366619	0	0	0.132427		0	3492.96	45314.4	456063	8507.12	91.3942	88.0155	102.102	0	1.00649	314.245	1192.07	6747.52	5.08115	20.5234	0	39.113	17.6553	35596.2
60	2005	2015	1	0	0	0.348627	6.20136	5.45921	645175	822599	0.523536	133.399	0.429343	0	0	0.135354		0	3331.16	43728.2	517829	10766.3	91.4135	79.6064	100.451	12.1421	1.00761	326.59	3178.13	8780.64	5.26755	21.6382	0	67.153	32.5517	56568.5
60	2006	2015	1	0	0	0.221017	6.27034	6.07647	112.1	1683300	0.502584	106.44	0.380778	64600	0	0.13828		7204.89	2488	41880	123352	19463	81.24	58.23	97.46	23.9	0.996211	316.188	6633	10813.8	5.45396	22.7529	0	95.193	47.4481	77540.8
60	2007	2015	1	0	0	0.419857	6.22166	6.57675	2087073	2087073	0.518909	107.01	0.384263	76875.7	0.000719759	0.141207		10500.6	3030	37574	123446	19977	90.02	59.57	98.73	38.47	0.990521	352.187	8075	19149	5.63	22.8285	0	108.298	68.3934	121314
60	2008	2015	1	0	0	0.490874	6.1725	6.79717	113.4	2697900	0.548908	106.82	0.38373	125949	0.00281547	0.144133		15000.7	3026	34872	133457	17869	96.6	61.35	99.8	47.823	1.05697	352.533	9336	15281.1	5.9	24.4288	0	139.837	75.7144	114768
60	2009	2015	1	0	0	0.463685	6.2504	7.79135	113.5	3237121	0.533283	107.24	0.964192	175023	0.00491118	0.14706		22060.1	3012	34311	127785	16210	98	70	100	71.898	0.976699	338.701	10514	12097.2	6.13	25.7997	0	170.416	95.5818	109781
60	2010	2015	1	0	0	0.449497	6.22975	8.60098	114.8	3952900	0.585267	108.46	0.960538	156633	0.00760958	0.151459		29863.6	2073	42527	1525718	13171	98.51	71.52	100	203.3	1.0359	435.761	12400	12720.7	6.17	28.2961	0	212.985	103.563	124635
60	2011	2015	1	0	0	0.427312	6.24997	9.26033	113.8	4908900	0.590417	412	0.990291	263143	0.0112888	0.140852		33684.8	3350	37737	2430909	21099	90.02	0	100	122.765	1.00124	436.054	13800	22743.9	6.06	29.3968	495163	253.13	122.321	192492
60	2012	2015	1	0	0	0.565699	6.23903	9.42021	111.3	5603900	0.60035	109.4	0.962523	330161	0.0124882	0.177591		45001.1	2250	31083	2156273	17500	90.78	0	100	140.7	1.02163	415.032	16450	23448.1	6.57	30.5896	533602	286.368	131.711	227966
60	2013	2015	1	0	0	0.574074	6.24326	10.1324	110.1	6309400	0.594478	109.8	0.960838	384309	0.0144696	0.14923		57169.4	2278	35752	1525000	19460	90.22	0	0	161.6	1.05924	444.906	16200	24581.9	7.1	30.988	587798	311.214	147.153	252911
60	2014	2015	1	0	0	0.546448	6.27445	10.7962	109.7	6866400	0.593018	110.2	0.960073	427412	0.00775511	0.158826		69804	1710	32875	1626723	50017	88.75	0	100	172.4	0.998793	473.81	21094	27690.4	6.647	30.9229	615071	331.209	161.304	259330
60	2015	2015	1	1	1	0.532214	6.30716	11.1405	108.9	7300100	0.578677	110.29	0.960377	471713	0.00952161	0.163409		82369	1734	38776	0	45389	98.16	0	100	177	1.01362	418.426	24450	29853.8	7.2111	32.4047	680825	338.894	178.846	271804
60	2016	2015	1	1	1	0.473476	6.33443	11.6592	108.1	7978200	0.544709	111	0.954955	529051	0.0299253	0.16999		87371	1013	8932	0	27381	84.52	0	100	235.6	1.00725	423.694	27087	32393.8	7.3738	33.1863	787930	341.777	209.195	253884
60	2017	2015	1	1	1	0.59031	6.30645	12.4047	0	8.74562e+06	0.602027	139.085	1.18203	567611	0.0216769	0.170471		92988.3	1389.56	24693.5	1.25902e+06	37876.6	91.6447	0	80.638	241.577	1.02112	474.736	27010.8	33178.2	7.50442	35.0153	927850	403.633	211.308	308236
60	2018	2015	1	1	1	0.61045	6.31521	12.9835	0	9.40587e+06	0.608568	139.559	1.24476	616685	0.0237726	0.173397		101516	1227.76	23107.2	1.32078e+06	40135.8	91.664	0	78.9869	260.697	1.02225	487.081	28996.8	35211.3	7.69083	36.1301	1.02927e+06	431.673	226.205	329208
60	2019	2015	1	1	1	0.63059	6.32397	13.5623	0	1.00661e+07	0.615109	140.032	1.30748	665759	0.0258683	0.176324		110044	1065.96	21521	1.38255e+06	42395	91.6833	0	77.3358	279.816	1.02338	499.427	30982.9	37244.4	7.87723	37.2449	1.13069e+06	459.713	241.101	350181
61	2000	2015	1	0	0	0.230664	6.13042	5.3605	4.78872e+06	0	0.497406	416.978	0.037318	100300	0.0091916	0.200747		0	10271.1	90572.5	1.26821e+06	13196.5	79.549	103.925	46.2109	0	0.966977	448.747	0	1074.79	8.81297	16.3446	0	145.66	0	4.6972e+06
61	2001	2015	1	0	0	0.234132	6.15394	5.95672	4.43401e+06	0	0.494005	419.543	0.107842	100300	0.00963246	0.199367		0	10003.1	87505.6	1.27285e+06	15020.2	79.4294	96.8013	49.0163	0	0.970461	477.581	3972.74	3869.65	10.3149	23.6229	0	199.72	0	4.87613e+06
61	2002	2015	1	0	0	0.2376	6.17747	6.55294	4.07929e+06	0	0.490604	422.107	0.178366	100300	0.0100733	0.197988		0	9735.21	84438.6	1.2775e+06	16844	79.3098	89.6775	51.8216	0	0.973944	506.414	10872.8	6664.52	11.8167	30.9011	0	253.781	0	5.05507e+06
61	2003	2015	1	0	0	0.241067	6.20099	7.14915	3.72458e+06	0	0.487203	424.672	0.248891	100300	0.0105142	0.196608		0	9467.28	81371.7	1.28215e+06	18667.7	79.1902	82.5536	54.627	0	0.977428	535.248	17772.9	9459.38	13.3186	38.1793	0	307.842	64.1668	5.23401e+06
61	2004	2015	1	0	0	0.244535	6.22451	7.74537	3.36987e+06	317840	0.483802	427.236	0.319415	100300	0.0109551	0.195229		0	9199.35	78304.8	1.2868e+06	20491.4	79.0706	75.4298	57.4323	48.3346	0.980911	564.082	24673	12254.2	14.8205	45.4575	0	361.902	136.808	5.41295e+06
61	2005	2015	1	0	0	0.248003	6.24803	8.34159	3.01516e+06	891369	0.4804	429.801	0.389939	100300	0.0113959	0.193849		9061.56	8931.41	75237.8	1.29144e+06	22315.1	78.951	68.306	60.2376	121.175	0.984394	592.915	31573.1	15049.1	16.3224	52.7358	0	415.963	209.449	5.59189e+06
61	2006	2015	1	0	0	0.253169	6.29239	9.24861	113.307	1895000	0.454064	417.797	0.347571	100300	0.0118368	0.192469		35061.5	7984.18	69062.6	797507	28520.8	76.1273	45.0736	59.8051	245.178	0.982717	581.313	36324	17844	17.8242	60.014	0	470.024	282.091	5.77083e+06
61	2007	2015	1	0	0	0.250735	6.30615	9.72861	9.75467e+06	2103500	0.464822	422.501	0.330949	100300	0.0122776	0.19109		43879.3	8517.05	67749.6	840498	24525.4	77.0793	50.0784	65.4194	276.387	0.980196	670.163	43462.3	21081	20.34	71.5942	0	480.548	379.017	5.80806e+06
61	2008	2015	1	0	0	0.260135	6.30996	9.79326	112.221	2491800	0.473758	427.241	0.335398	100300	0.0127185	0.18971		54856.6	8134.07	63771.2	1.00161e+06	21683.4	78.7751	56.2903	69.1482	334.449	1.02081	717.338	52754.7	23168.2	20.9601	74.9442	0	548.718	422.795	5.88064e+06
61	2009	2015	1	0	0	0.265596	6.36275	10.3494	111.902	2942619	0.463345	430.016	0.999679	100300	0.0131594	0.188331		72444.9	7705.22	58580	1.03232e+06	18974.5	78.8716	59.3137	71.8611	404.53	0.963538	694.423	55218.9	26222.7	21.7966	79.7971	0	597.015	500.241	5.44026e+06
61	2010	2015	1	0	0	0.261458	6.363	11.2296	113.432	3511300	0.470287	435.911	0.99299	100300	0.0130497	0.175949		89042.4	7935.92	59520	1.22768e+06	18776.1	82.141	70.4389	77.0939	453.781	1.01682	741.85	64029.4	28720.6	22.5665	84.324	0	703.665	568.741	7.03306e+06
61	2011	2015	1	0	0	0.26709	6.36238	12.1306	112.374	4181900	0.486776	550.873	0.990383	100300	0.0141463	0.184687		99551.2	7734.08	65414.5	2.60249e+06	51294.5	76.5802	0	79.3297	537.299	1.01487	743.569	75882.7	32145	24.2132	93.1664	2.18593e+06	806.969	639.637	7.18408e+06
61	2012	2015	1	0	0	0.266736	6.37823	12.4586	110.769	4821900	0.476428	441.512	0.990127	100300	0.0146282	0.201541		121777	7274.26	59491.8	2.26928e+06	48979.9	78.3541	0	83.5111	602.098	1.00552	791.278	86874.7	34629.8	26.4125	102.345	2.49915e+06	862.677	693.859	7.25244e+06
61	2013	2015	1	0	0	0.28564	6.40233	13.0353	109.596	5524800	0.470595	441.241	0.992699	100300	0.0154208	0.186375		143483	7086.1	53915.9	2.3351e+06	38751.7	81.4615	0	74.6039	696.352	1.04517	852.035	95421	37252.1	30.2453	116.211	2.84314e+06	902.384	777.188	7.44149e+06
61	2014	2015	1	0	0	0.276394	6.45332	13.8626	108.165	6120100	0.457124	445.286	0.990786	100300	0.0162252	0.178112		162107	6782.45	55073	2.40613e+06	43354.9	82.5167	0	89.8465	758.307	1.01828	880.639	100278	39517.6	30.7268	120.152	2.92794e+06	922.575	861.239	7.5993e+06
61	2015	2015	1	1	1	0.293633	6.50189	14.4235	107.591	6708100	0.428902	444.56	0.99673	100300	0.0147798	0.177048		179568	6572.47	48701.5	0	48312.2	80.1238	0	90.4455	819.73	0.978465	858.07	93665.4	43138.7	32.28	128.96	3.37529e+06	917.443	944.597	7.16127e+06
61	2016	2015	1	1	1	0.276313	6.54838	14.8477	107.104	7357000	0.413826	440.133	0.97661	100300	0.0162098	0.175976		191845	4836.31	23918.7	0	22658.6	68.5373	0	86.7022	1012.29	1.03187	894.418	98799.9	46281.5	31.3048	128.947	3.58588e+06	931.577	1028.87	6.74937e+06
61	2017	2015	1	1	1	0.289615	6.53029	15.4962	0	7.77373e+06	0.439587	460.576	1.23623	100300	0.0166863	0.177294		207959	5716.24	38434.7	1.34721e+06	44199.8	77.5159	0	93.9017	995.261	1.02619	938.92	114374	48587.5	34.3449	140.074	4.38781e+06	1064.69	1081.15	7.73916e+06
61	2018	2015	1	1	1	0.293083	6.55382	16.0924	0	8.34725e+06	0.436185	463.14	1.30675	100300	0.0171271	0.175915		224534	5448.31	35367.7	1.35186e+06	46023.5	77.3963	0	96.7071	1068.1	1.02968	967.754	121274	51382.3	35.8468	147.353	4.86891e+06	1118.75	1153.79	7.9181e+06
61	2019	2015	1	1	1	0.296551	6.57734	16.6886	0	8.92078e+06	0.432784	465.705	1.37728	100300	0.017568	0.174535		241109	5180.38	32300.8	1.35651e+06	47847.2	77.2767	0	99.5124	1140.94	1.03316	996.588	128175	54177.2	37.3487	154.631	5.35002e+06	1172.81	1226.43	8.09704e+06
62	2000	2015	1	0	0	0.122742	6.03513	4.30669	781969	0	0.338167	73.7195	0	0	0	0.167943		0	5132.35	14290.1	0	0	99.9694	8.78164	0	0	0.997924	0	4650.76	3231.35	3.35958	2.61531	0	0	0	0
62	2001	2015	1	0	0	0.126689	6.05354	4.93226	724053	0	0.354208	75.21	0.0380122	0	0	0.164612		0	4907.09	15054	0	0	99.9373	8.33455	0	0	0.998363	0	4590.55	5666.07	3.55014	3.93523	0	0	0	0
62	2002	2015	1	0	0	0.130637	6.07195	5.55783	666138	0	0.37025	76.7005	0.114473	0	0	0.161282		0	4681.83	15817.9	0	0	99.9052	7.88745	0	0	0.998803	0	4530.33	8100.79	3.74071	5.25515	0	0	0	0
62	2003	2015	1	0	0	0.134584	6.09035	6.18341	608222	0	0.386291	78.1909	0.190934	0	0.000353399	0.157952		0	4456.56	16581.8	49187.4	0	99.8731	7.44036	0	0	0.999243	0	4470.11	10535.5	3.93127	6.57507	0	0	11.6482	0
62	2004	2015	1	0	0	0.138532	6.10876	6.80898	550307	0	0.402332	79.6814	0.267396	0	0.000992519	0.154622		0	4231.3	17345.7	102833	0	99.841	6.99327	0	3.84865	0.999682	0	4409.89	12970.2	4.12183	7.895	0	0	23.794	0
62	2005	2015	1	0	0	0.14248	6.12717	7.43456	492391	430132	0.418373	81.1718	0.343857	0	0.00163164	0.151292		4511.97	4006.04	18109.6	156478	0	99.8089	6.54618	6.81	18.367	1.00012	14.2353	4349.67	15404.9	4.3124	9.21492	0	20.0169	35.9399	109453
62	2006	2015	1	0	0	0.13322	6.07906	7.86533	113.5	1196125	0.405859	82.21	0.265904	52100	0.00227076	0.147962		6896.34	2227	13131	16716	7751	99.28	0	42.7	32.288	1.01066	59.4352	4967	17839.7	4.50296	10.5348	0	46.8007	48.0857	468744
62	2007	2015	1	0	0	0.202515	6.15052	8.75525	1592770	1592770	0.456504	83.32	0.295367	89664.9	0.00290988	0.144631		10352.8	2760	16128	23937	7837	99.68	0	26	37.328	1.03105	88.2504	5944	21140.8	4.41	11.2636	0	76.9149	53.6126	1.10951e+06
62	2008	2015	1	0	0	0.184749	6.17398	9.57863	112.8	2121817	0.468395	84.76	0.337187	141830	0.003549	0.141301		14632	3093	20112	148535	7114	99.75	0	21.79	44.762	0.966474	101.292	5095	23242.2	4.79	13.33	0	99.9398	66.3393	1.44761e+06
62	2009	2015	1	0	0	0.140912	6.23101	9.80042	113.9	2510367	0.497652	86.92	0.987575	193995	0.00418812	0.137971		25410	3862	24776	140575	8414	99.88	6.68	18.41	111.207	0.997098	105.179	3964	25127.5	5.05	12.7076	0	118.812	82.0009	1.40754e+06
62	2010	2015	1	0	0	0.127676	6.28379	10.4931	114.2	3204155	0.498636	91.24	0.976326	226867	0.00257766	0.116938		37684.4	5889	31585	577586	9951	100	35.82	26.63	90.303	0.983246	108.274	4427	27484.4	5.23	16.2511	0	147.069	104.211	1.74266e+06
62	2011	2015	1	0	0	0.127084	6.27735	11.2831	112.3	4137721	0.525959	91.4	0.998906	282991	0.00391457	0.13414		49127	2910	28091	843997	11647	100	0	58.1	108.3	1.04147	136.922	1234	29395.4	5.61	18.1376	530791	190.091	120.849	2.31617e+06
62	2012	2015	1	0	0	0.117335	6.287	11.9218	111.3	4439937	0.526039	91.6	0.998908	355497	0.00651	0.162149		55038.9	3108	21462	1017451	12112	99.91	0	90.73	121.402	0.983111	181.875	1849	31379.5	5.94	19.9848	636163	198.806	127.069	2.63214e+06
62	2013	2015	1	0	0	0.132705	6.26119	12.3596	110.2	5251470	0.563812	93	0.992473	407146	0.00951977	0.116547		47544.7	1555	20246	1111943	12198	99.53	0	92.6	134.959	0.99352	205.162	2220	34355.7	6.11	20.1523	734107	245.655	133.241	2.2097e+06
62	2014	2015	1	0	0	0.319293	6.28747	12.9637	108.5	5889380	0.577922	94.2	0.993631	454522	0.0145124	0.117035		47830.9	1732	24445	1381103	49787	98.58	0	90.81	136.8	0.98978	289.55	2331	35344.8	6.3943	21.279	812063	276.848	144.58	2.73254e+06
62	2015	2015	1	1	1	0.17812	6.29375	13.7768	108.1	6207242	0.568691	95.61	0.992888	520496	0.00507827	0.106262		52615	1441	27855	0	48784	99.96	0	94.44	161.438	1.00651	258.277	2860	41258.6	6.4076	23.7406	1.05664e+06	283.18	154.014	4.29761e+06
62	2016	2015	1	1	1	0.164209	6.28864	14.2703	107.3	6760383	0.571356	97	0.989691	556461	0.00509953	0.11948		60014	622	21792	0	27046	99.21	0	99.71	181.46	1.02744	322.433	8981	43577.4	5.5687	21.0975	1.00353e+06	303.803	162.961	4.55296e+06
62	2017	2015	1	1	1	0.189851	6.34806	14.9414	0	7.44466e+06	0.610868	99.0573	1.26139	611314	0.00930107	0.11133		69514.6	1302.87	27276.4	800221	40131.6	99.4238	1.18109	113.539	192.587	1.0054	323.337	3627.05	44621.6	6.59916	25.054	1.23721e+06	341.423	181.69	4.42095e+06
62	2018	2015	1	1	1	0.193798	6.36647	15.567	0	8.02921e+06	0.626909	100.548	1.33785	663479	0.00994019	0.108		74931.5	1077.61	28040.3	853866	43749.9	99.3917	0.734	122.433	207.105	1.00584	349.096	3566.84	47056.3	6.78972	26.3739	1.37537e+06	368.207	193.835	4.78024e+06
62	2019	2015	1	1	1	0.197746	6.38488	16.1926	0	8.61375e+06	0.64295	102.038	1.41431	715644	0.0105793	0.104669		80348.4	852.345	28804.2	907511	47368.2	99.3596	0.286909	131.327	221.624	1.00628	374.854	3506.62	49491	6.98029	27.6938	1.51352e+06	394.99	205.981	5.13953e+06
63	2000	2012	1	0	0	0.0472271	6.58888	6.19923	1.76979e+07	0	0.653277	355.146	1.00536	0	0.00986216	0.273326		0	36084.4	190165	904611	24434.2	108.218	125.435	92.6322	0	1.04244	2431.32	107817	7248.29	1.5098	3.61293	0	1338.26	229.088	2.31578e+07
63	2001	2012	1	0	0	0.0507746	6.60056	6.60489	1.63869e+07	4.40785e+06	0.651182	358.962	1.00448	0	0.0118953	0.267443		0	34725.6	181295	911617	25282.5	107.032	116.785	93.0227	0	1.03954	2534.37	116104	9996.78	4.28394	22.2749	0	1514.01	377.181	2.38682e+07
63	2002	2012	1	0	0	0.0543221	6.61224	7.01056	1.5076e+07	9.93234e+06	0.649088	362.778	1.00361	0	0.0139285	0.261561		0	33366.9	172425	918623	26130.7	105.846	108.136	93.4133	0	1.03665	2637.43	124392	12745.3	7.05808	40.9369	0	1689.76	525.274	2.45786e+07
63	2003	2012	1	0	0	0.0578696	6.62392	7.41623	1.37651e+07	1.54568e+07	0.646993	366.594	1.00273	0	0.0159617	0.255678		555.879	32008.2	163555	925629	26979	104.66	99.4873	93.8038	0	1.03375	2740.48	132679	15493.8	9.83222	59.5989	0	1865.51	673.366	2.5289e+07
63	2004	2012	1	0	0	0.0614171	6.6356	7.8219	1.24541e+07	2.09813e+07	0.644898	370.411	1.00185	417330	0.0179949	0.249795		25448	30649.4	154685	932635	27827.2	103.475	90.8382	94.1944	12.2667	1.03085	2843.53	140966	18242.2	12.6064	78.2609	0	2041.25	821.459	2.59994e+07
63	2005	2012	1	0	0	0.0649645	6.64729	8.22757	1.11432e+07	2.65058e+07	0.642804	374.227	1.00098	872178	0.0200281	0.243912		50340.1	29290.7	145816	939641	28675.5	102.289	82.1891	94.5849	243.177	1.02795	2946.59	149253	20990.7	15.3805	96.923	0	2217	969.551	2.67098e+07
63	2006	2012	1	0	0	0.0857462	6.67962	8.47962	114.1	29281591	0.629167	358.06	1	1570600	0.0220612	0.238029		89525	22491	133704	558888	22244	99.03	65.49	97.75	507.4	0.982529	2828.71	113700	23739.2	18.1546	115.585	0	2392.75	1117.64	2.74202e+07
63	2007	2012	1	0	0	0.0784606	6.66546	8.78821	36051142	36051142	0.645666	361.08	1	1.78188e+06	0.0240944	0.232146		105223	29042	132609	735764	30052	98.38	47.53	96.66	603.9	1.02159	3422.47	157285	28331.4	25.27	204.648	0	2327.82	1195.1	2.87804e+07
63	2008	2012	1	0	0	0.0766379	6.65127	9.49554	110.4	43333044	0.656037	364.34	1	2.23672e+06	0.0261276	0.226264		123064	26347	124100	611450	29355	98.61	72.39	94.54	804	1.05648	3493.22	180650	29314.5	24.51	219.52	0	2684.28	1317.59	2.76833e+07
63	2009	2012	1	0	0	0.0682925	6.70899	10.1834	109.7	48208972	0.636183	367.63	0.995512	2.69157e+06	0.0281608	0.220381		147056	25136	102294	702691	29866	97.51	68.83	95.47	1116.49	1.05109	3340.49	187367	32432.9	25.5	131.565	0	2888.63	1604.54	2.49049e+07
63	2010	2012	1	0	0	0.0709604	6.7218	10.4205	112.4	56515223	0.633738	370.89	0.995605	3060545	0.0312004	0.190192		171963	26683	99100	996915	33401	99.52	79	95.59	1305.33	1.01199	3367.77	196749	34136.1	26.89	56.07	0	3260.99	1844.32	3.21923e+07
63	2011	2012	1	0	0	0.0701694	6.7078	10.4512	110	65802823	0.597023	612.5	0.99298	3417326	0.0331822	0.214734		193396	20748	89320	1626955	37885	97.18	0	95.7	1678.93	1.04004	3321.11	215440	35516.8	28.49	170.754	3.39477e+06	3656.39	1987.39	3.43482e+07
63	2012	2012	1	1	1	0.0608896	6.72502	11.233	108.2	66130223	0.631876	377.7	0.996029	3840803	0.0387874	0.222724		212833	20396	84626	1992461	42338	92.71	0	92.5	2190	0.996782	3544.8	234984	39333	27.25	179.107	3.69412e+06	3501.52	2017.03	3.28103e+07
63	2013	2012	1	1	1	0.120446	6.7297	11.474	108.5	70101725	0.624291	381.6	0.994759	4382128	0.0335173	0.210001		237560	14822	79441	1967613	49831	93.14	0	98	2341	0.963952	3693.79	252089	41779.6	42.36	298.722	4.0522e+06	3601.46	2099.69	3.28553e+07
63	2014	2012	1	1	1	0.106434	6.74071	12.159	107.8	74415994	0.638047	385.6	0.994813	5011922	0.029287	0.201408		261245	16413	71984	1605703	44480	99.94	0	100	2485.2	0.970136	4064.61	265588	45290.4	44.177	326.003	4.27059e+06	3743.3	2200.94	3.43812e+07
63	2015	2012	1	1	1	0.104364	6.77188	12.1737	108	80039186	0.625113	388.97	0.995681	5575469	0.0378457	0.160017		303552	16336	67108	0	29321	84.7	0	100	2438.5	0.978983	4113.63	237728	49583.8	44.4583	306.815	6.41702e+06	3881.97	2428.96	3.28324e+07
63	2016	2012	1	1	1	0.106343	6.78889	12.4192	107.5	86300002	0.61545	400	0.9875	6045001	0.0502347	0.178869		351204	14107	34273	0	22642	86.2	0	100	2444.3	1.04254	4023.42	147167	52840.4	45.2189	289.056	5.47265e+06	4047.22	2625.97	3.24846e+07
63	2017	2012	1	1	1	0.107534	6.78746	13.0956	0	9.27996e+07	0.617667	420.022	0.990457	6.33036e+06	0.0444262	0.173318		349045	12985.9	39377	1.02371e+06	38854.5	88.0602	0	99.2715	3014.11	0.993162	4183.23	248701	53972.6	48.6702	320.867	6.9962e+06	4325.97	2746.66	3.52344e+07
63	2018	2012	1	1	1	0.111082	6.79915	13.5013	0	9.83241e+07	0.615573	423.838	0.98958	6.78521e+06	0.0464594	0.167435		373937	11627.1	30507.1	1.03072e+06	39702.8	86.8745	0	99.662	3245.02	0.990264	4286.29	256988	56721.1	51.4443	339.529	7.77185e+06	4501.71	2894.76	3.59448e+07
63	2019	2012	1	1	1	0.114629	6.81083	13.9069	0	1.03849e+08	0.613478	427.655	0.988704	7.24006e+06	0.0484926	0.161552		398830	10268.4	21637.2	1.03772e+06	40551	85.6887	0	100.053	3475.93	0.987365	4389.34	265275	59469.5	54.2185	358.191	8.5475e+06	4677.46	3042.85	3.66552e+07
64	2000	2012	1	0	0	0.100108	6.42746	5.64962	9.69346e+06	0	0.411408	584.615	0	0	0.0178159	0.26435		0	6814.84	145866	1.4613e+06	0	93.9484	145.671	100.306	0	0.965329	610.772	1595.21	0	19.4049	2.90584	0	0	0	1.05085e+07
64	2001	2012	1	0	0	0.111274	6.45102	6.15713	8.97544e+06	0	0.415207	590.751	0	0	0.0175997	0.259687		0	6649.45	139852	1.4576e+06	0	94.0127	135.533	100.02	0	0.968301	639.621	12743.7	2420.65	22.2937	21.1865	0	75.4109	0	1.09667e+07
64	2002	2012	1	0	0	0.122439	6.47458	6.66464	8.25741e+06	0	0.419007	596.887	0.0488347	0	0.0173834	0.255024		0	6484.07	133839	1.45391e+06	0	94.0771	125.395	99.7339	0	0.971274	668.471	23892.2	5851.3	25.1825	39.4672	0	212.015	0	1.14249e+07
64	2003	2012	1	0	0	0.133605	6.49814	7.17216	7.53938e+06	323368	0.422807	603.024	0.132012	0	0.0171672	0.250361		0	6318.69	127825	1.45022e+06	0	94.1415	115.257	99.4478	0	0.974247	697.321	35040.8	9281.94	28.0712	57.7479	0	348.619	101.469	1.18831e+07
64	2004	2012	1	0	0	0.14477	6.52171	7.67967	6.82136e+06	4.97253e+06	0.426607	609.16	0.215188	0	0.016951	0.245698		0	6153.31	121811	1.44653e+06	0	94.2058	105.118	99.1617	0	0.97722	726.17	46189.3	12712.6	30.96	76.0286	0	485.223	275.24	1.23414e+07
64	2005	2012	1	0	0	0.155936	6.54527	8.18718	6.10333e+06	9.62168e+06	0.430407	615.296	0.298365	323212	0.0167348	0.241034		0	5987.93	115797	1.44283e+06	0	94.2702	94.9804	98.8756	199.877	0.980192	755.02	57337.8	16143.2	33.8488	94.3093	0	621.827	449.012	1.27996e+07
64	2006	2012	1	0	0	0.193385	6.54933	8.82636	113.4	16640515	0.423781	622.73	0	1156200	0.0165186	0.236371		73234.1	5631	101500	863462	21157	95.86	77	100	621.835	0.985027	751.266	66069	19573.9	36.7376	112.59	0	758.431	622.783	1.32578e+07
64	2007	2012	1	0	0	0.195395	6.58681	9.24877	19745818	19745818	0.435809	630.3	0.388656	1.35168e+06	0.0163024	0.231708		100145	6135	104063	1027000	8507	93.6	73.76	100	675.422	0.970266	957.25	70015	23950.5	38.18	146.436	0	917.786	852.427	1.41742e+07
64	2008	2012	1	0	0	0.194458	6.56958	9.61357	113	22841602	0.432108	635.95	0.413413	1.86592e+06	0.0160862	0.227045		125271	5659	92837	1292174	8047	96.02	68.74	97.3	613.171	1.00926	965.139	100150	25987.8	43.98	153.276	0	1023.45	911.507	1.33267e+07
64	2009	2012	1	0	0	0.144888	6.72911	10.0218	112.3	26040448	0.440105	637.92	0.998448	2.38015e+06	0.01587	0.222382		164672	4288	90277	1462428	7027	94.36	72.76	98.2	840.775	0.965825	868.616	103227	29198.2	47.63	155.298	0	1053.91	1192.34	1.15945e+07
64	2010	2012	1	0	0	0.155545	6.69103	10.6451	113.9	31234092	0.467551	645.9	0.993823	2478206	0.015913	0.213351		231744	4920	93635	1373417	8590	98.14	83.41	98.25	1050	0.967475	760.576	118524	32039.8	48.84	170.82	0	1290.44	1324.36	1.53214e+07
64	2011	2012	1	0	0	0.195335	6.69025	11.3903	112.3	37363796	0.459109	649.4	0.997382	3200356	0.0135631	0.196483		272028	5488	91320	2106361	33813	90.05	0	99.94	1332.68	1.02196	837.473	127745	36892.6	48.01	201.865	3.17307e+06	1494.62	1484.83	1.95438e+07
64	2012	2012	1	1	1	0.309097	6.69692	11.5555	111.4	42182887	0.46722	655.3	0.995422	3820151	0.0157717	0.233204		326649	5333	76225	1697679	37487	90	0	86.4	1725	1.03749	858.164	133877	40935.5	51.64	229.467	3.49645e+06	1631.7	1646.07	1.66856e+07
64	2013	2012	1	1	1	0.286838	6.69997	12.3972	111	46784951	0.476627	655.5	0.999847	4539690	0.016158	0.202519		386984	4682	76043	2918549	0	94.32	0	92.61	1971	1.00223	923.74	143036	44251.1	59.19	237.099	4.42927e+06	1770.07	1777.83	1.63368e+07
64	2014	2012	1	1	1	0.254666	6.73188	13.0391	109.9	51691647	0.477962	674.9	0.993036	5108707	0.0162277	0.20989		442759	4681	56385	2886372	105712	95.97	0	99.49	2079.5	1.0428	920.168	154651	47860.5	60.1112	254.563	4.67565e+06	1913.16	1953.1	1.74312e+07
64	2015	2012	1	1	1	0.254411	6.78975	13.0708	109	56180844	0.455081	678.36	0.997479	5604635	0.0138517	0.186207		489391	4439	55370	0	90911	95.35	0	97.81	2067	0.9901	1148.65	167852	50119.7	63.5303	279.104	5.82342e+06	1964.97	2193.01	1.66013e+07
64	2016	2012	1	1	1	0.268199	6.81845	13.7464	108.4	61976395	0.449904	687	0.994178	5989113	0.0135507	0.184451		521807	3696	39196	0	67548	97.55	0	98.75	2451.4	0.985873	1218.25	181372	53188.8	65.148	303.409	6.52711e+06	2037.43	2449.79	1.67645e+07
64	2017	2012	1	1	1	0.289922	6.82802	14.2773	0	6.54116e+07	0.476004	688.933	1.29649	6.49402e+06	0.0141403	0.185077		573617	4003.35	43630.5	1.39852e+06	82767.7	95.0425	0	95.4425	2605.18	1.01587	1101.22	191120	57311	68.5143	313.678	7.36241e+06	2261.08	2534.27	1.82982e+07
64	2018	2012	1	1	1	0.301088	6.85158	14.7849	0	7.00607e+07	0.479804	695.069	1.37966	7.00826e+06	0.0139241	0.180414		621724	3837.96	37616.6	1.39483e+06	90671.4	95.1069	0	95.1565	2805.62	1.01884	1130.07	202269	60741.6	71.4031	331.958	8.18967e+06	2397.68	2708.04	1.87564e+07
64	2019	2012	1	1	1	0.312253	6.87514	15.2924	0	7.47099e+07	0.483604	701.205	1.46284	7.52249e+06	0.0137079	0.175751		669832	3672.58	31602.7	1.39113e+06	98575.1	95.1713	0	94.8704	3006.06	1.02181	1158.91	213417	64172.3	74.2919	350.239	9.01692e+06	2534.28	2881.81	1.92146e+07
65	2000	2013	1	0	0	0	6.51952	2.54935	4.78872e+06	1.19191e+06	0.61458	230.444	0.50086	266269	0.0175087	0.163547		17893.6	8620.24	116012	3.07212e+06	1058.64	71.4599	109.418	0	0	0.997007	877.578	17061.2	12004.8	8.77398	68.297	0	289.259	92.3126	972286
65	2001	2013	1	0	0	0	6.52543	3.01144	4.43401e+06	1.93559e+06	0.609621	229.494	0.537975	323177	0.0168781	0.159282		21691.8	8158.73	110941	2.95693e+06	4775.73	69.49	101.896	0	0	0.997988	893.141	17368.9	13838.6	9.04046	67.8335	0	305.637	111.511	936846
65	2002	2013	1	0	0	0.00441531	6.53133	3.47354	4.07929e+06	2.67927e+06	0.604661	228.543	0.57509	380084	0.0162476	0.155018		25490	7697.22	105869	2.84175e+06	8492.82	67.5201	94.3749	0	28.1186	0.99897	908.703	17676.6	15672.4	9.30694	67.3699	0	322.015	130.71	901406
65	2003	2013	1	0	0	0.00885192	6.53724	3.93563	3.72458e+06	3.42295e+06	0.599701	227.593	0.612206	436992	0.0156171	0.150753		29288.2	7235.71	100798	2.72656e+06	12209.9	65.5502	86.8535	7.27273	61.7543	0.999951	924.266	17984.3	17506.1	9.57342	66.9063	0	338.393	149.909	865966
65	2004	2013	1	0	0	0.0132885	6.54314	4.39772	3.36987e+06	4.16663e+06	0.594741	226.643	0.649321	493900	0.0149865	0.146488		33086.4	6774.2	95726.4	2.61137e+06	15927	63.5803	79.332	15.4545	95.3899	1.00093	939.828	18292	19339.9	9.83991	66.4428	0	354.771	169.108	830526
65	2005	2013	1	0	0	0.0177251	6.54905	4.85981	3.01516e+06	4.91031e+06	0.589781	225.692	0.686436	550808	0.014356	0.142224		36884.7	6312.69	90654.9	2.49618e+06	19644.1	61.6104	71.8105	23.6364	129.026	1.00191	955.391	18599.6	21173.7	10.1064	65.9792	0	371.149	188.307	795086
65	2006	2013	1	0	0	0.0231165	6.58998	5.25834	113.307	4578200	0.556	223.9	0.662394	275600	0.0137255	0.137959		20079.8	5968	81467	1555920	28821	65.41	54.1	0	109.781	0.974723	928.776	5279	23007.4	10.3729	65.5157	0	387.527	207.505	759646
65	2007	2013	1	0	0	0.0275196	6.59301	5.68465	9.75467e+06	5472400	0.56	223.72	0.661362	664624	0.0130949	0.133694		28148.7	6232	90494	1585236	28925	65.26	48.78	0	198.1	1.05373	992.16	6850	23992.4	10.89	72.2103	0	306.182	204.504	680566
65	2008	2013	1	0	0	0.0296653	6.57768	6.6463	112.221	6624400	0.567	223.19	0.659976	721532	0.0124644	0.12943		38074	5647	74152	1492528	35833	56.38	56.88	100	252.2	0.985169	1020.44	13386	26534.9	10.74	57.0207	0	355.052	228.694	801592
65	2009	2013	1	0	0	0.0318631	6.59026	7.10995	111.902	6986400	0.561	222.61	1.0013	778440	0.0118339	0.125165		49600.9	3806	73639	1780316	27895	60.44	57.36	100	314.6	1.01804	932.367	31284	29314.6	10.72	63.579	0	372.909	247.211	577082
65	2010	2013	1	0	0	0.0298238	6.5711	7.11691	113.432	8951600	0.587	220.91	1.00385	812507	0.00768501	0.0887007		68152.6	3031	50553	3994381	17937	43.87	76.38	100	317.805	1.01147	1120.18	44182	32357.8	10.82	65.728	0	483.718	289.901	638750
65	2011	2013	1	0	0	0.0405061	6.52785	7.12852	112.374	11133679	0.60493	220.1	1.00182	1065018	0.00958568	0.14604		77151.8	3223	59214	2609729	38690	40.62	0	0	335.967	0.994783	1085.83	20826	31605.1	11.47	60.6867	1.44399e+06	588.215	322.648	562155
65	2012	2013	1	0	0	0.0567897	6.5154	7.52698	110.769	12363686	0.595894	219.3	1.00182	1301533	0.0127287	0.160589		96652.3	2835	55891	2483680	49096	23.36	0	100	354.602	0.981379	1041.93	12635	32990.4	12.32	61.9734	1.70425e+06	627.174	352.897	524547
65	2013	2013	1	1	1	0.0689055	6.51144	8.51994	109.596	13404500	0.593	218	1.00275	1342095	0.0117466	0.0778096		111103	2089	51430	2062756	48169	40.41	0	100	376.32	1.0517	1122.15	52108	35282	13.69	60.232	1.89932e+06	659.401	374.243	551873
65	2014	2013	1	1	1	0.0639543	6.59232	9.36367	108.165	12765826	0.542947	217.4	1.00138	1342512	0.012011	0.0732962		91998.6	2190	54283	2291111	77166	49.25	0	100	411.932	0.976778	1108.94	35731	37110.4	13.2769	65.2249	1.81803e+06	563.752	398.852	458744
65	2015	2013	1	1	1	0.0684756	6.66	9.52526	107.591	12164773	0.488678	215.76	1.00375	737669	0.00898659	0.104867		59740	1792	46684	0	71426	60.14	0	100	437.846	1.00588	1160.65	2606	40290.3	12.6045	63.7647	1.34568e+06	476.9	420.3	444485
65	2016	2013	1	1	1	0.0471736	6.70019	10.0754	107.104	8650721	0.503794	215	1	773283	0.00243864	0.105443		15712.2	2167	24680	0	37455	42.56	0	100	530.082	1.03218	1023	16	41453.1	11.8537	59.241	1.37773e+06	342.761	291.735	407463
65	2017	2013	1	1	1	0.0709645	6.61991	10.4049	0	1.38345e+07	0.530263	214.288	1.13182	1.2337e+06	0.00678961	0.091048		82463.3	774.582	29797.3	1.11394e+06	64249.2	37.9715	0	121.818	532.654	1.01369	1142.14	22291.8	43178.8	13.3042	60.4165	2.18783e+06	567.685	418.692	369806
65	2018	2013	1	1	1	0.0754011	6.62581	10.867	0	1.45781e+07	0.525303	213.337	1.16894	1.29061e+06	0.00615908	0.0867833		86261.5	313.073	24725.8	998748	67966.3	36.0015	0	130	566.289	1.01467	1157.7	22599.5	45012.6	13.5706	59.9529	2.41127e+06	584.063	437.891	334366
65	2019	2013	1	1	1	0.0798377	6.63172	11.3291	0	1.53218e+07	0.520343	212.387	1.20605	1.34752e+06	0.00552855	0.0825187		90059.7	0	19654.3	883560	71683.4	34.0316	0	138.182	599.925	1.01565	1173.26	22907.2	46846.3	13.8371	59.4894	2.63471e+06	600.441	457.089	298926
66	2000	2015	1	0	0	0.128984	5.77131	5.26322	1.80623e+06	0	0.462315	361.659	0	0	0	0.125988		0	15309.7	28774.5	0	37123	88.2265	108.852	51.4139	0	1.01571	66.4708	0	0	7.08372	0	0	0	0	0
66	2001	2015	1	0	0	0.142774	5.79892	5.70583	1.67244e+06	0	0.464771	364.54	0	0	0	0.130713		0	14404.1	27818.8	0	35608.1	86.7109	101.304	52.7427	0	1.01533	70.1035	0	0	7.72557	0	0	0	0	0
66	2002	2015	1	0	0	0.156564	5.82652	6.14843	1.53865e+06	0	0.467227	367.421	0.0568409	0	0	0.135438		0	13498.5	26863.2	0	34093.1	85.1953	93.7556	54.0715	13.7922	1.01494	73.7362	0	0	8.36743	4.02049	0	2.81026	0	0
66	2003	2015	1	0	0	0.170354	5.85413	6.59104	1.40487e+06	0	0.469683	370.301	0.136418	0	0	0.140163		0	12592.9	25907.5	0	32578.2	83.6796	86.2076	55.4004	38.8168	1.01456	77.3689	0	0	9.00929	11.9752	0	37.7488	3.9356	0
66	2004	2015	1	0	0	0.184143	5.88173	7.03365	1.27108e+06	808624	0.47214	373.182	0.215995	0	0	0.144889		0	11687.3	24951.9	0	31063.3	82.164	78.6596	56.7292	63.8413	1.01417	81.0016	2193.25	382.053	9.65114	19.9298	0	72.6873	28.0624	0
66	2005	2015	1	0	0	0.197933	5.90934	7.47625	1.13729e+06	1746283	0.474596	376.062	0.295572	22272.8	0	0.149614		2652.22	10781.7	23996.2	0	29548.3	80.6484	71.1116	58.058	88.8659	1.01378	84.6344	4952.31	3922.66	10.293	27.8845	0	107.626	52.1893	0
66	2006	2015	1	0	0	0.247765	5.9475	8.15923	112.3	3135607	0.442976	383.78	0.238418	139300	0	0.154339		15864	7168	22500	5330	26565	65.98	55.02	57.53	153.2	0.990395	83.7098	11729	7463.26	10.9349	35.8391	0	142.564	76.3161	53032.9
66	2007	2015	1	0	0	0.22959	6.0017	8.48136	3679225	3679225	0.467218	385.1	0.242534	261309	0	0.159064		22605	10835	17992	3563	23666	68.51	57.03	59.22	166	1.05491	101.861	14703	13694.3	12.55	50.32	0	171.93	115.896	195423
66	2008	2015	1	0	0	0.247174	5.96486	8.9631	113.2	4340496	0.479761	387.74	0.24501	380827	0.000544029	0.163789		33627	11377	18092	3655	23175	69.54	58.04	60.12	197.41	1.01441	111.504	15164	14600.5	12.15	52.2	0	196.654	122.263	199368
66	2009	2015	1	0	0	0.248933	5.99568	9.51339	113.1	5029103	0.472768	399.14	0.974996	500345	0.00268057	0.168514		48195.2	6925	20622	4473	24087	57.52	38.97	49.47	207.171	0.990324	82.9343	13599	17312	12.59	54.5146	0	226.112	148.254	309854
66	2010	2015	1	0	0	0.240745	6.07851	9.61078	114	6300124	0.499149	403.96	0.994034	554271	0.00613	0.145836		64739.9	4543	22366	5240	21805	86.81	75	50	209.562	0.975407	88.2983	15160	19719.6	12.81	62.2348	0	289.462	180.138	348356
66	2011	2015	1	0	0	0.261338	6.05782	9.61976	112.5	7425067	0.532803	301.9	0.997681	759910	0.00610525	0.176384		55312	4451	20273	5540	23005	88.76	0	50	201.8	1.01868	99.1412	17630	23006.6	13.51	70.2094	1.56047e+06	345.524	183.398	540984
66	2012	2015	1	0	0	0.232682	6.06438	9.90144	111	8250400	0.528374	417.8	0.943753	872478	0.00893876	0.207323		66140.5	4010	19908	6489	35682	95	0	100	290	1.03102	115.032	19625	27783.6	14.07	80.9586	1.72134e+06	371.111	201.85	566709
66	2013	2015	1	0	0	0.29861	6.12312	10.8395	110.1	9406413	0.519879	419.6	0.942803	1004770	0.0105319	0.208611		79409.8	3539	19748	6598	0	89	0	100	0	1.01088	129.841	22089	33446.4	16.46	99.3661	1.88897e+06	405.754	239.051	647705
66	2014	2015	1	0	0	0.351071	6.15822	11.1719	109.7	10367713	0.515919	427.5	0.928655	1163784	0.0122331	0.200521		95724.8	2924	19708	140680	23573	89.23	0	100	299.389	1.05103	118.839	25104	37129.9	16.449	107.995	2.08066e+06	435.078	266.917	777185
66	2015	2015	1	1	1	0.376346	6.20421	12.1127	109.1	11051377	0.497042	399.28	0.997971	1268195	0.0168151	0.190298		109967	3057	19676	0	23487	76.75	0	100	312.405	1.02278	114.836	39162	39726.4	16.7266	110.818	2.36083e+06	440.609	300.004	831237
66	2016	2015	1	1	1	0.353139	6.22865	13.0776	109	12109070	0.426768	401	0.997506	1228002	0.0178331	0.182928		125130	0	0	0	0	0	0	0	592.21	0.966287	124.739	42608	42946.6	17.335	107.281	2.45642e+06	465.027	332.366	955795
66	2017	2015	1	1	1	0.363411	6.2406	12.7875	0	1.29982e+07	0.50407	410.629	1.25049	1.45649e+06	0.0197729	0.206315		127660	0	12528.3	36997.4	11369	62.4607	0	74.0038	389.161	1.00915	128.227	38061	46409.9	17.9953	123.34	3.03569e+06	526.888	341.711	1.02149e+06
66	2018	2015	1	1	1	0.377201	6.26821	13.2301	0	1.39358e+07	0.506526	413.509	1.33007	1.57601e+06	0.0219094	0.21104		138077	0	11572.7	40412.6	9854.02	60.9451	0	75.3326	414.185	1.00876	131.86	40820	49950.5	18.6371	131.295	3.3682e+06	561.827	365.838	1.10953e+06
66	2019	2015	1	1	1	0.390991	6.29581	13.6727	0	1.48735e+07	0.508982	416.39	1.40965	1.69553e+06	0.024046	0.215765		148494	0	10617	43827.8	8339.07	59.4295	0	76.6615	439.21	1.00838	135.492	43579.1	53491.1	19.279	139.25	3.70072e+06	596.765	389.965	1.19757e+06
67	2000	2015	1	0	0	0.216552	6.04884	3.89151	950022	0	0.433404	195.759	0.185339	19122.6	0.0111303	0.0309203		6753.08	0	48802.8	1.83582e+06	34015.3	102.933	32.3782	47.0003	0	1.02495	245.927	1228.95	1470.83	6.67754	30.6962	0	51.546	5.02995	0
67	2001	2015	1	0	0	0.227673	6.05389	4.48547	879657	0	0.430892	195.379	0.245768	55475	0.0106328	0.0388704		8708.9	137.182	51406.9	1784097	33325.2	101.806	30.5818	50.6509	0	1.02389	259.792	2011.18	3852.38	6.91949	31.6508	0	60.3804	16.1495	3119.86
67	2002	2015	1	0	0	0.238794	6.05895	5.07944	809293	340196	0.428381	195	0.306197	91827.4	0.0101354	0.0468205		10664.7	339.073	54011	1.73238e+06	32635.1	100.679	28.7855	54.3015	0	1.02283	273.656	2793.41	6233.94	7.16144	32.6055	0	69.2147	27.2691	14433.5
67	2003	2015	1	0	0	0.249914	6.064	5.67341	738929	751665	0.42587	194.62	0.366626	128180	0.00963789	0.0547706		12620.5	540.964	56615.2	1.68065e+06	31944.9	99.5524	26.9891	57.9522	0	1.02177	287.52	3575.64	8615.49	7.40338	33.5601	0	78.049	38.3887	25747.2
67	2004	2015	1	0	0	0.261035	6.06905	6.26737	668565	1.16313e+06	0.423359	194.24	0.427055	164532	0.00914044	0.0627207		14576.4	742.855	59219.3	1.62893e+06	31254.8	98.4254	25.1927	61.6028	0	1.02071	301.384	4357.86	10997	7.64533	34.5147	0	86.8834	49.5083	37060.8
67	2005	2015	1	0	0	0.272156	6.07411	6.86134	598201	1.5746e+06	0.420848	193.861	0.487484	200885	0.00864298	0.0706708		16532.2	944.745	61823.5	1.57721e+06	30564.7	97.2984	23.3964	65.2535	10.5902	1.01965	315.249	5140.09	13378.6	7.88728	35.4693	0	95.7177	60.6279	48374.4
67	2006	2015	1	0	0	0.243742	6.22777	7.34731	113.8	1586389	0.378848	192.97	0.447997	89700	0.00814552	0.0786209		10148.8	1043	60654	857774	16736	100	0	72.5	57	0.969871	292.533	1844	15760.2	8.12923	36.424	0	104.552	71.7475	59688.1
67	2007	2015	1	0	0	0.278312	6.16151	7.94705	1935087	1935087	0.388613	193.07	0.447454	273590	0.00764806	0.086571		10409.3	1067	74367	1207313	45127	90.34	0	65.91	91.71	1.05535	339.191	2521	18479.3	8.3	33.3058	0	75.2168	76.552	76458.2
67	2008	2015	1	0	0	0.299802	6.0993	8.87482	113.4	2339120	0.399766	192.46	0.447729	309942	0.00715061	0.0945211		14066.1	986	50798	1416340	26902	90.39	0	68.95	127.142	1.02226	366.609	5166	20355.9	8.22	35.1546	0	88.3079	83.2939	73202.3
67	2009	2015	1	0	0	0.311969	6.08282	9.26652	113.1	2879693	0.411884	192.27	1.00052	346294	0.00665315	0.102471		20145.7	986	61923	1416340	26902	90.45	58.8	85	139.6	1.0095	376.405	6413	21878.7	8.79	39.4496	0	112.796	100.418	74059.7
67	2010	2015	1	0	0	0.376241	5.96025	9.9399	114.2	3788656	0.418249	192.38	0.99974	300700	0.00241979	0.1157		35069.4	544	52912	1514400	28368	96.25	80	85	215.43	1.01242	394.796	11013	23334.7	9.15	41.8265	0	145.856	117.605	90647.3
67	2011	2015	1	0	0	0.404587	5.98614	10.2475	112.2	4802605	0.444488	192.1	1.00052	501433	0.00685261	0.118945		39087.8	3976	102211	1955177	18353	96.08	0	90.91	262.083	1.05916	411.979	14958	28916.8	9.43	41.0077	1.1211e+06	186.45	136.912	112738
67	2012	2015	1	0	0	0.375694	5.9898	10.8893	109.5	5599635	0.45682	191.6	1.00104	640300	0.00823044	0.142694		50602.1	4183	102154	1466430	27460	89.45	0	90.91	295.586	0.977886	428.812	18295	32828.9	9.88	51.1687	1.23774e+06	217.747	152.156	152611
67	2013	2015	1	0	0	0.365727	6.01153	11.8588	108.7	6151240	0.463256	191.1	1.00105	704970	0.00738618	0.114076		58323.3	3615	102913	1747437	24785	85.63	0	100	325.7	1.01701	453.391	20506	33230.3	10.19	48.6161	1.42739e+06	236.453	163.215	171324
67	2014	2015	1	0	0	0.303591	6.13371	12.1103	105.8	6061578	0.447903	191	1.00052	712144	0.00247159	0.115287		43407.3	4217	109144	2354531	37983	85.84	0	99.55	353.411	1.02248	452.504	25106	33701	10.6915	44.7138	1.42571e+06	220.351	175.531	180801
67	2015	2015	1	1	1	0.403154	6.12863	12.955	103	5255376	0.3821	189.47	1.00406	371524	0.00305323	0.164595		20780	2399	93342	0	30062	89.87	0	100	392.17	1.0279	433.947	1669	36852.1	10.2236	43.5073	1.0428e+06	161.088	165.598	166965
67	2016	2015	1	1	1	0.364855	6.36721	13.2401	97.5	4078179	0.271668	189	1	358394	0.00222939	0.168603		8897.92	701	41513	0	7985	81.6	0	100	457.269	0.972275	432.608	677	39009.6	9.7243	37.994	1.08513e+06	87.1439	157.77	120325
67	2017	2015	1	1	1	0.405603	6.13474	13.9889	0	6.51223e+06	0.390715	189.306	1.21263	637114	0.00267349	0.166072		40002	3367.44	93073.1	956559	22283.1	83.7744	1.84	109.061	483.428	1.00692	481.62	14526.8	41957.3	10.7907	46.9249	1.68709e+06	201.73	194.063	184138
67	2018	2015	1	1	1	0.416724	6.1398	14.5829	0	6.9237e+06	0.388204	188.927	1.27306	673466	0.00217603	0.174022		41957.8	3569.33	95677.2	904838	21593	82.6474	0.0436364	112.712	522.831	1.00586	495.484	15309	44338.8	11.0326	47.8795	1.86038e+06	210.564	205.182	195452
67	2019	2015	1	1	1	0.427845	6.14485	15.1769	0	7.33516e+06	0.385692	188.547	1.33349	709818	0.00167857	0.181972		43913.6	3771.22	98281.4	853117	20902.9	81.5204	0	116.362	562.235	1.0048	509.348	16091.3	46720.4	11.2745	48.8341	2.03368e+06	219.398	216.302	206765
68	2000	2015	1	0	0	0.702308	5.66277	8.44651	4.78872e+06	0	0.26834	905.077	0	0	0	0.220636		0	2874.94	0	1.38561e+06	0	91.911	108.412	0	0	0.969817	0	0	0	15.251	0	0	0	0	0
68	2001	2015	1	0	0	0.705051	5.68727	8.87954	4.43401e+06	0	0.278537	915.391	0	0	0	0.219334		0	2867.18	1243.91	1.3414e+06	0	92.1727	101.004	0	0	0.972736	14.4116	0	378.89	15.7231	0	0	0	0	0
68	2002	2015	1	0	0	0.707795	5.71177	9.31258	4.07929e+06	0	0.288734	925.705	0	0	0	0.218031		0	2859.43	2885.91	1.29718e+06	0	92.4345	93.5954	0	0	0.975655	36.6231	0	3091.54	16.1951	0	0	0	10.7532	0
68	2003	2015	1	0	0	0.710539	5.73628	9.74561	3.72458e+06	275452	0.298931	936.02	0	0	0	0.216728		0	2851.67	4527.91	1.25297e+06	0	92.6962	86.1871	0	0	0.978574	58.8346	0	5804.18	16.6672	0	0	13.9859	38.1805	0
68	2004	2015	1	0	0	0.713282	5.76078	10.1786	3.36987e+06	1.31464e+06	0.309127	946.334	0.0882258	0	0	0.215425		0	2843.92	6169.91	1.20875e+06	294.827	92.9579	78.7788	0	0	0.981493	81.0461	468.764	8516.83	17.1393	2.16883	0	48.2504	65.6079	0
68	2005	2015	1	0	0	0.716026	5.78528	10.6117	3.01516e+06	2.35383e+06	0.319324	956.648	0.183794	0	0	0.214122		0	2836.16	7811.91	1.16453e+06	1351.07	93.2196	71.3705	0	0	0.984412	103.258	1959.56	11229.5	17.6114	11.8165	0	82.5149	93.0353	0
68	2006	2015	1	0	0	0.668601	5.86089	10.7917	113.307	3783558	0.309515	954.61	0.119965	138800	1.35683e-05	0.21282		11264.7	2722	12377	497078	3143	100	30.72	0	67.057	0.968769	123.802	5700	13942.1	18.0835	21.4642	0	116.779	120.463	0
68	2007	2015	1	0	0	0.68576	5.88725	11.466	9.75467e+06	4624200	0.3348	974.29	0.122212	136673	0.000987799	0.211517		16070.1	2657	11478	939609	3387	89.36	62.75	0	100.529	1.05502	138.75	6530	17575.9	19.23	46.9348	0	151.101	167.164	119748
68	2008	2015	1	0	0	0.731682	5.85151	12.4221	112.221	5412744	0.334	987.79	0.123316	261849	0.00196203	0.210214		18892	2956	10735	1107206	4387	87.79	71.5	0	109.249	1.0036	169.973	8328	19247.1	18.98	48.2198	0	170.661	184.103	118047
68	2009	2015	1	0	0	0.761528	5.8767	12.5941	111.902	6078090	0.361341	1000.5	0.993643	387025	0.00293626	0.208911		25046.6	2947	9071	1003689	3838	89.83	64.65	0	118.156	0.96209	195.475	4842	21071.6	19.44	48.5027	0	207.438	204.028	135303
68	2010	2015	1	0	0	0.7419	5.87777	12.6135	113.432	7215098	0.391898	1011.84	0.994396	411810	0.0035674	0.187989		34898.7	2575	10405	1186166	3891	92.86	66.51	0	221.263	0.99222	213.644	8882	24188.1	19.77	52.3959	0	260.276	222.533	221720
68	2011	2015	1	0	0	0.76466	5.86491	13.038	112.374	8532100	0.401	1025.8	0.993176	557333	0.00606426	0.218636		40537.1	3045	20454	1257039	12733	98.7	0	40.15	330.7	0.995148	241.927	6488	28368.5	20.59	63.5009	1.89147e+06	298.891	243.226	364857
68	2012	2015	1	0	0	0.765542	5.90367	13.34	110.769	9625300	0.413	1039.8	0.993268	693125	0.0069129	0.238993		51488.9	2878	19201	1227240	12199	99.97	0	36.91	365.178	0.990959	273.807	10512	30581.1	20.49	64.9563	2.3179e+06	338.389	268.663	589584
68	2013	2015	1	0	0	0.798206	5.91881	14.1982	109.596	10624800	0.411	1053.2	0.993638	854566	0.00608605	0.192521		64525.8	2820	18267	1352850	0	99.97	0	78.74	505.7	0.994711	310.268	13433	32751.9	20.13	74.3379	2.59404e+06	362.222	293.109	701700
68	2014	2015	1	0	0	0.748204	6.00296	14.2664	108.165	11889700	0.424	1051.4	1.00086	1035094	0.0047905	0.183989		80513.2	2640	50657	1320780	16070	99.79	0	67.01	569.4	0.961496	249.13	16461	34398.5	22.0289	88.168	2.87421e+06	410.453	331.342	804532
68	2015	2015	1	1	1	0.715104	6.06993	14.9045	107.591	12674500	0.407	1042.65	1.0042	1200425	0.00900194	0.191548		100500	2946	16827	0	14861	99.26	0	69.63	705.8	1.03851	335.039	18463	38973.1	22.6811	119.011	3.46225e+06	414.222	372.84	747352
68	2016	2015	1	1	1	0.676172	6.14093	15.6741	107.104	14018600	0.398	1062	0.990584	1334441	0.0114092	0.212223		129262	2500	14831	0	10065	85.16	0	85.67	984	1.05866	349.978	20309	41461	23.459	139.237	3.42746e+06	438.691	426.123	586828
68	2017	2015	1	1	1	0.748948	6.07932	15.8081	0	1.48241e+07	0.441686	1080.42	1.33062	1.38843e+06	0.0107301	0.198489		117988	2743.11	27515.9	633948	14026	96.3604	0	94.4985	878.199	1.01944	369.796	19849.2	43781.2	23.2763	127.589	4.24548e+06	493.689	422.164	892956
68	2018	2015	1	1	1	0.751692	6.10383	16.2411	0	1.58633e+07	0.451882	1090.74	1.42618	1.51361e+06	0.0117043	0.197186		128971	2735.35	29157.9	589733	15082.3	96.6221	0	104.519	962.792	1.02236	392.007	21340	46493.9	23.7484	137.236	4.71617e+06	527.954	449.591	975499
68	2019	2015	1	1	1	0.754436	6.12833	16.6742	0	1.69025e+07	0.462079	1101.05	1.52175	1.63878e+06	0.0126786	0.195883		139954	2727.6	30799.9	545517	16138.5	96.8838	0	114.54	1047.39	1.02528	414.219	22830.8	49206.5	24.2205	146.884	5.18685e+06	562.218	477.019	1.05804e+06
69	2000	2015	1	0	0	0.230664	6.13042	2.33662	4.78872e+06	0	0.292183	416.978	0.037318	15600	0.0091916	0.200747		0	10271.1	90572.5	1.26821e+06	13196.5	79.549	103.925	46.2109	0	1.03067	448.747	0	1074.79	8.81297	16.3446	0	145.66	0	4.6972e+06
69	2001	2015	1	0	0	0.234132	6.15394	2.73694	4.43401e+06	0	0.286485	419.543	0.107842	15600	0.00963246	0.199367		0	10003.1	87505.6	1.27285e+06	15020.2	79.4294	96.8013	49.0163	0	1.02874	477.581	3972.74	3869.65	10.3149	23.6229	0	199.72	0	4.87613e+06
69	2002	2015	1	0	0	0.2376	6.17747	3.13725	4.07929e+06	0	0.280786	422.107	0.178366	15600	0.0100733	0.197988		0	9735.21	84438.6	1.2775e+06	16844	79.3098	89.6775	51.8216	0	1.02681	506.414	10872.8	6664.52	11.8167	30.9011	0	253.781	0	5.05507e+06
69	2003	2015	1	0	0	0.241067	6.20099	3.53756	3.72458e+06	0	0.275087	424.672	0.248891	15600	0.0105142	0.196608		0	9467.28	81371.7	1.28215e+06	18667.7	79.1902	82.5536	54.627	0	1.02489	535.248	17772.9	9459.38	13.3186	38.1793	0	307.842	64.1668	5.23401e+06
69	2004	2015	1	0	0	0.244535	6.22451	3.93788	3.36987e+06	17322.2	0.269388	427.236	0.319415	15600	0.0109551	0.195229		0	9199.35	78304.8	1.2868e+06	20491.4	79.0706	75.4298	57.4323	48.3346	1.02296	564.082	24673	12254.2	14.8205	45.4575	0	361.902	136.808	5.41295e+06
69	2005	2015	1	0	0	0.248003	6.24803	4.33819	3.01516e+06	132794	0.263689	429.801	0.389939	15600	0.0113959	0.193849		9061.56	8931.41	75237.8	1.29144e+06	22315.1	78.951	68.306	60.2376	121.175	1.02103	592.915	31573.1	15049.1	16.3224	52.7358	0	415.963	209.449	5.59189e+06
69	2006	2015	1	0	0	0.253169	6.29239	4.44523	113.307	299537	0.2276	417.797	0.347571	15600	0.0118368	0.192469		35061.5	7984.18	69062.6	797507	28520.8	76.1273	45.0736	59.8051	245.178	1.05219	581.313	36324	17844	17.8242	60.014	0	470.024	282.091	5.77083e+06
69	2007	2015	1	0	0	0.250735	6.30615	5.3753	9.75467e+06	353661	0.241539	422.501	0.330949	15600	0.0122776	0.19109		43879.3	8517.05	67749.6	840498	24525.4	77.0793	50.0784	65.4194	276.387	1.04027	670.163	43462.3	21081	20.34	71.5942	0	480.548	379.017	5.80806e+06
69	2008	2015	1	0	0	0.260135	6.30996	5.66681	112.221	433693	0.25	427.241	0.335398	15600	0.0127185	0.18971		54856.6	8134.07	63771.2	1.00161e+06	21683.4	78.7751	56.2903	69.1482	334.449	0.967785	717.338	52754.7	23168.2	20.9601	74.9442	0	548.718	422.795	5.88064e+06
69	2009	2015	1	0	0	0.265596	6.36275	5.96294	111.902	576547	0.234	430.016	0.999679	15600	0.0131594	0.188331		72444.9	7705.22	58580	1.03232e+06	18974.5	78.8716	59.3137	71.8611	404.53	0.992434	694.423	55218.9	26222.7	21.7966	79.7971	0	597.015	500.241	5.44026e+06
69	2010	2015	1	0	0	0.261458	6.363	6.38922	113.432	676898	0.237018	435.911	0.99299	15600	0.0130497	0.175949		89042.4	7935.92	59520	1.22768e+06	18776.1	82.141	70.4389	77.0939	453.781	0.989409	741.85	64029.4	28720.6	22.5665	84.324	0	703.665	568.741	7.03306e+06
69	2011	2015	1	0	0	0.26709	6.36238	6.92131	112.374	813356	0.2518	550.873	0.990383	15600	0.0141463	0.184687		99551.2	7734.08	65414.5	2.60249e+06	51294.5	76.5802	0	79.3297	537.299	1.05834	743.569	75882.7	32145	24.2132	93.1664	2.18593e+06	806.969	639.637	7.18408e+06
69	2012	2015	1	0	0	0.266736	6.37823	7.06576	110.769	967400	0.269	441.512	0.990127	15600	0.0146282	0.201541		121777	7274.26	59491.8	2.26928e+06	48979.9	78.3541	0	83.5111	602.098	0.966297	791.278	86874.7	34629.8	26.4125	102.345	2.49915e+06	862.677	693.859	7.25244e+06
69	2013	2015	1	0	0	0.28564	6.40233	7.27124	109.596	1088928	0.2622	441.241	0.992699	15600	0.0154208	0.186375		143483	7086.1	53915.9	2.3351e+06	38751.7	81.4615	0	74.6039	696.352	1.01767	852.035	95421	37252.1	30.2453	116.211	2.84314e+06	902.384	777.188	7.44149e+06
69	2014	2015	1	0	0	0.276394	6.45332	7.70841	108.165	1246932	0.227	445.286	0.990786	15600	0.0162252	0.178112		162107	6782.45	55073	2.40613e+06	43354.9	82.5167	0	89.8465	758.307	0.982889	880.639	100278	39517.6	30.7268	120.152	2.92794e+06	922.575	861.239	7.5993e+06
69	2015	2015	1	1	1	0.293633	6.50189	8.32894	107.591	1265416	0.1636	444.56	0.99673	15600	0.0147798	0.177048		179568	6572.47	48701.5	0	48312.2	80.1238	0	90.4455	819.73	1.04652	858.07	93665.4	43138.7	32.28	128.96	3.37529e+06	917.443	944.597	7.16127e+06
69	2016	2015	1	1	1	0.276313	6.54838	9.00562	107.104	1359521	0.1607	440.133	0.97661	15600	0.0162098	0.175976		191845	4836.31	23918.7	0	22658.6	68.5373	0	86.7022	1012.29	0.990224	894.418	98799.9	46281.5	31.3048	128.947	3.58588e+06	931.577	1028.87	6.74937e+06
69	2017	2015	1	1	1	0.289615	6.53029	9.14195	0	1.51846e+06	0.195303	460.576	1.23623	15600	0.0166863	0.177294		207959	5716.24	38434.7	1.34721e+06	44199.8	77.5159	0	93.9017	995.261	0.997884	938.92	114374	48587.5	34.3449	140.074	4.38781e+06	1064.69	1081.15	7.73916e+06
69	2018	2015	1	1	1	0.293083	6.55382	9.54226	0	1.63393e+06	0.189604	463.14	1.30675	15600	0.0171271	0.175915		224534	5448.31	35367.7	1.35186e+06	46023.5	77.3963	0	96.7071	1068.1	0.995955	967.754	121274	51382.3	35.8468	147.353	4.86891e+06	1118.75	1153.79	7.9181e+06
69	2019	2015	1	1	1	0.296551	6.57734	9.94258	0	1.7494e+06	0.183905	465.705	1.37728	15600	0.017568	0.174535		241109	5180.38	32300.8	1.35651e+06	47847.2	77.2767	0	99.5124	1140.94	0.994027	996.588	128175	54177.2	37.3487	154.631	5.35002e+06	1172.81	1226.43	8.09704e+06
70	2000	2015	1	0	0	0.230664	6.13042	5.80821	4.78872e+06	0	0	416.978	0.037318	42200	0.0091916	0.200747		0	10271.1	90572.5	1.26821e+06	13196.5	79.549	103.925	46.2109	0	0.999711	448.747	0	1074.79	8.81297	16.3446	0	145.66	0	4.6972e+06
70	2001	2015	1	0	0	0.234132	6.15394	6.32169	4.43401e+06	0	0	419.543	0.107842	42200	0.00963246	0.199367		0	10003.1	87505.6	1.27285e+06	15020.2	79.4294	96.8013	49.0163	0	1.00075	477.581	3972.74	3869.65	10.3149	23.6229	0	199.72	0	4.87613e+06
70	2002	2015	1	0	0	0.2376	6.17747	6.83516	4.07929e+06	0	0	422.107	0.178366	42200	0.0100733	0.197988		0	9735.21	84438.6	1.2775e+06	16844	79.3098	89.6775	51.8216	0	1.00178	506.414	10872.8	6664.52	11.8167	30.9011	0	253.781	0	5.05507e+06
70	2003	2015	1	0	0	0.241067	6.20099	7.34864	3.72458e+06	53765.5	0	424.672	0.248891	42200	0.0105142	0.196608		0	9467.28	81371.7	1.28215e+06	18667.7	79.1902	82.5536	54.627	0	1.00282	535.248	17772.9	9459.38	13.3186	38.1793	0	307.842	64.1668	5.23401e+06
70	2004	2015	1	0	0	0.244535	6.22451	7.86212	3.36987e+06	233066	0	427.236	0.319415	42200	0.0109551	0.195229		0	9199.35	78304.8	1.2868e+06	20491.4	79.0706	75.4298	57.4323	48.3346	1.00386	564.082	24673	12254.2	14.8205	45.4575	0	361.902	136.808	5.41295e+06
70	2005	2015	1	0	0	0.248003	6.24803	8.37559	3.01516e+06	412367	0	429.801	0.389939	42200	0.0113959	0.193849		9061.56	8931.41	75237.8	1.29144e+06	22315.1	78.951	68.306	60.2376	121.175	1.00489	592.915	31573.1	15049.1	16.3224	52.7358	0	415.963	209.449	5.59189e+06
70	2006	2015	1	0	0	0.253169	6.29239	8.74573	113.307	600200	0	417.797	0.347571	42200	0.0118368	0.192469		35061.5	7984.18	69062.6	797507	28520.8	76.1273	45.0736	59.8051	245.178	1.00953	581.313	36324	17844	17.8242	60.014	0	470.024	282.091	5.77083e+06
70	2007	2015	1	0	0	0.250735	6.30615	9.59722	9.75467e+06	788700	0	422.501	0.330949	42200	0.0122776	0.19109		43879.3	8517.05	67749.6	840498	24525.4	77.0793	50.0784	65.4194	276.387	1.01822	670.163	43462.3	21081	20.34	71.5942	0	480.548	379.017	5.80806e+06
70	2008	2015	1	0	0	0.260135	6.30996	9.89957	112.221	940100	0	427.241	0.335398	42200	0.0127185	0.18971		54856.6	8134.07	63771.2	1.00161e+06	21683.4	78.7751	56.2903	69.1482	334.449	0.994215	717.338	52754.7	23168.2	20.9601	74.9442	0	548.718	422.795	5.88064e+06
70	2009	2015	1	0	0	0.265596	6.36275	10.6825	111.902	1031500	0	430.016	0.999679	42200	0.0131594	0.188331		72444.9	7705.22	58580	1.03232e+06	18974.5	78.8716	59.3137	71.8611	404.53	1.02983	694.423	55218.9	26222.7	21.7966	79.7971	0	597.015	500.241	5.44026e+06
70	2010	2015	1	0	0	0.261458	6.363	11.123	113.432	1228300	0	435.911	0.99299	42200	0.0130497	0.175949		89042.4	7935.92	59520	1.22768e+06	18776.1	82.141	70.4389	77.0939	453.781	1.01021	741.85	64029.4	28720.6	22.5665	84.324	0	703.665	568.741	7.03306e+06
70	2011	2015	1	0	0	0.26709	6.36238	11.3159	112.374	1522200	0	550.873	0.990383	42200	0.0141463	0.184687		99551.2	7734.08	65414.5	2.60249e+06	51294.5	76.5802	0	79.3297	537.299	0.972782	743.569	75882.7	32145	24.2132	93.1664	2.18593e+06	806.969	639.637	7.18408e+06
70	2012	2015	1	0	0	0.266736	6.37823	11.4991	110.769	1750200	0	441.512	0.990127	42200	0.0146282	0.201541		121777	7274.26	59491.8	2.26928e+06	48979.9	78.3541	0	83.5111	602.098	1.03027	791.278	86874.7	34629.8	26.4125	102.345	2.49915e+06	862.677	693.859	7.25244e+06
70	2013	2015	1	0	0	0.28564	6.40233	12.4046	109.596	2012200	0	441.241	0.992699	42200	0.0154208	0.186375		143483	7086.1	53915.9	2.3351e+06	38751.7	81.4615	0	74.6039	696.352	0.980341	852.035	95421	37252.1	30.2453	116.211	2.84314e+06	902.384	777.188	7.44149e+06
70	2014	2015	1	0	0	0.276394	6.45332	12.8289	108.165	2068100	0	445.286	0.990786	42200	0.0162252	0.178112		162107	6782.45	55073	2.40613e+06	43354.9	82.5167	0	89.8465	758.307	1.03121	880.639	100278	39517.6	30.7268	120.152	2.92794e+06	922.575	861.239	7.5993e+06
70	2015	2015	1	1	1	0.293633	6.50189	13.6309	107.591	2130400	0	444.56	0.99673	42200	0.0147798	0.177048		179568	6572.47	48701.5	0	48312.2	80.1238	0	90.4455	819.73	1.02569	858.07	93665.4	43138.7	32.28	128.96	3.37529e+06	917.443	944.597	7.16127e+06
70	2016	2015	1	1	1	0.276313	6.54838	14.2936	107.104	2298000	0	440.133	0.97661	42200	0.0162098	0.175976		191845	4836.31	23918.7	0	22658.6	68.5373	0	86.7022	1012.29	1.01995	894.418	98799.9	46281.5	31.3048	128.947	3.58588e+06	931.577	1028.87	6.74937e+06
70	2017	2015	1	1	1	0.289615	6.53029	14.5373	0	2.56398e+06	0	460.576	1.23623	42200	0.0166863	0.177294		207959	5716.24	38434.7	1.34721e+06	44199.8	77.5159	0	93.9017	995.261	1.01733	938.92	114374	48587.5	34.3449	140.074	4.38781e+06	1064.69	1081.15	7.73916e+06
70	2018	2015	1	1	1	0.293083	6.55382	15.0508	0	2.74328e+06	0	463.14	1.30675	42200	0.0171271	0.175915		224534	5448.31	35367.7	1.35186e+06	46023.5	77.3963	0	96.7071	1068.1	1.01837	967.754	121274	51382.3	35.8468	147.353	4.86891e+06	1118.75	1153.79	7.9181e+06
70	2019	2015	1	1	1	0.296551	6.57734	15.5643	0	2922580	0	465.705	1.37728	42200	0.017568	0.174535		241109	5180.38	32300.8	1.35651e+06	47847.2	77.2767	0	99.5124	1140.94	1.01941	996.588	128175	54177.2	37.3487	154.631	5.35002e+06	1172.81	1226.43	8.09704e+06
71	2000	2015	1	0	0	0.397017	5.8268	1.86699	4.78872e+06	0	0.393354	801.158	0	0	0	0.176901		0	5838.01	8696.49	0	204.464	81.3863	12.0361	40.3237	0	1.03818	127.45	16227.6	0	12.5849	95.2694	0	0	0	0
71	2001	2015	1	0	0	0.389133	5.86338	2.54516	4.43401e+06	0	0.397273	811.72	0	0	0	0.178773		0	6229.27	11475.4	0	3589	81.2909	11.3918	41.8155	0	1.03548	134.609	23957.3	0	13.9028	97.1386	0	0	0	0
71	2002	2015	1	0	0	0.381249	5.89997	3.22333	4.07929e+06	0	0.401192	822.282	0.0381839	0	0	0.180645		0	6620.54	14254.2	0	6973.54	81.1955	10.7475	43.3072	0	1.03278	141.768	31686.9	0	15.2207	99.0077	0	42.9763	0	0
71	2003	2015	1	0	0	0.373365	5.93655	3.90149	3.72458e+06	227406	0.405111	832.844	0.119513	0	0	0.182516		0	7011.8	17033.1	0	10358.1	81.1002	10.1033	44.7989	0	1.03007	148.926	39416.5	769.486	16.5387	100.877	0	94.7461	16.2218	0
71	2004	2015	1	0	0	0.36548	5.97314	4.57966	3.36987e+06	1.87198e+06	0.40903	843.406	0.200843	0	0	0.184388		0	7403.06	19812	0	13742.6	81.0048	9.459	46.2906	0	1.02737	156.085	47146.2	3992.81	17.8566	102.746	0	146.516	69.1217	112416
71	2005	2015	1	0	0	0.357596	6.00972	5.25783	3.01516e+06	3.51655e+06	0.412949	853.968	0.282173	0	0	0.18626		0	7794.33	22590.9	26173.3	17127.1	80.9095	8.81473	47.7824	15.9612	1.02467	163.244	54875.8	7216.13	19.1746	104.615	0	198.286	122.022	292452
71	2006	2015	1	0	0	0.350301	6.07575	5.8757	113.307	5827320	0.3888	861.15	0.203344	304600	0	0.188132		22302.4	6723	26234	14648	23188	79.71	0	40.58	156.049	0.993678	187.328	67639	10439.5	20.4925	106.484	0	250.055	174.922	472488
71	2007	2015	1	0	0	0.33912	6.10355	6.64201	9.75467e+06	7019653	0.4094	877.04	0.206387	318631	0	0.190004		26797.6	7998	22617	21663	21430	81.43	0	40.58	223.617	1.05427	241.343	74810	16228.6	23.14	100.887	0	287.385	261.342	696526
71	2008	2015	1	0	0	0.326911	6.11558	7.23153	112.221	8348486	0.4303	888.95	0.208448	563573	0	0.191875		37285.6	9920	26168	38783	22465	79.38	0	27.16	258.571	1.01681	274.786	83000	17395.6	23.56	106.317	0	339.221	285.693	838790
71	2009	2015	1	0	0	0.356635	6.12819	7.95378	111.902	9406290	0.4232	896.99	0.995518	808515	0	0.193747		52993	9435	31816	23505	20365	79.17	16.43	100	392.247	1.05006	119.3	87999	19553.3	24.2	119.456	0	378.546	330.244	787303
71	2010	2015	1	0	0	0.325401	6.17967	8.60327	113.432	11197412	0.4436	907.27	0.994335	790079	0.0041792	0.170062		78100	10437	29559	196978	20471	82.1	38.01	100	427.078	0.967514	129.311	83560	21725.9	24.93	138.738	0	457.26	378.508	1.01578e+06
71	2011	2015	1	0	0	0.29457	6.20016	9.54099	112.374	13359972	0.4724	918.3	0.994011	1100508	0.00401781	0.197796		81955	10983	51517	1549107	76407	77.4	0	38.4	500.346	0.994194	141.488	92862	24325	26.24	98.57	2.72359e+06	551.225	412.369	1.6489e+06
71	2012	2015	1	0	0	0.290277	6.25489	9.91906	110.769	15084851	0.4619	926.7	0.995468	1412773	0.00370741	0.233473		103591	11255	50885	1567399	64887	83.6	0	38.4	680	0.996727	157.615	102445	27983.2	27.41	108.74	3.44052e+06	593.138	476.154	1.76765e+06
71	2013	2015	1	0	0	0.285092	6.30405	10.7557	109.596	16733140	0.4566	928.5	0.999031	1843669	0.00942226	0.211066		133087	10738	52420	2219154	0	83	0	51.47	0	1.03509	161.281	110714	33954.3	29.35	119.07	3.98599e+06	633.917	532.568	1.69696e+06
71	2014	2015	1	0	0	0.276014	6.3361	11.3733	108.165	18435921	0.4575	954.2	0.986586	2253118	0.0113735	0.202903		160877	11434	51365	2565055	56490	82.05	0	55.03	695.112	0.993972	296.979	122204	36695.8	30.5707	127.003	4.36221e+06	686.08	583.656	1.9504e+06
71	2015	2015	1	1	1	0.272776	6.38958	12.2988	107.591	19738688	0.441	960.63	0.996658	2455124	0.0135591	0.19126		189221	12510	57431	0	62177	82.74	0	57.84	711.066	0.995735	282.989	137013	40360.9	33.8716	134.027	4.93323e+06	698.293	648.099	2.07625e+06
71	2016	2015	1	1	1	0.296105	6.4341	12.401	107.104	22071959	0.4164	971	0.891864	2431804	0.0186309	0.20208		220551	10128	31893	0	43898	73.13	0	74.6	1349.98	0.994891	275.732	151543	43454.7	34.1395	114.835	5.32306e+06	722.824	750.077	2.14829e+06
71	2017	2015	1	1	1	0.262986	6.44875	13.3958	0	2.32514e+07	0.459978	980.711	1.25813	2.76805e+06	0.0192849	0.208721		220472	12489.5	55937.3	1.46406e+06	57741.6	79.7651	1.08345	65.6831	964.777	0.992232	249.148	147631	45896	34.9899	127.044	6.3744e+06	819.523	756.82	2.45288e+06
71	2018	2015	1	1	1	0.255102	6.48534	14.074	0	2.4896e+07	0.463897	991.272	1.33946	3.01299e+06	0.0217886	0.210593		240448	12880.8	58716.2	1.58389e+06	61126.1	79.6697	0.439182	67.1748	1043.85	0.989529	256.306	155361	49119.3	36.3078	128.914	7.08304e+06	871.292	809.72	2.63292e+06
71	2019	2015	1	1	1	0.247218	6.52192	14.7522	0	2.65405e+07	0.467816	1001.83	1.42079	3.25794e+06	0.0242923	0.212465		260425	13272	61495.1	1.70371e+06	64510.7	79.5744	0	68.6665	1122.91	0.986826	263.465	163091	52342.6	37.6257	130.783	7.79168e+06	923.062	862.62	2.81295e+06
72	2000	2015	1	0	0	0.337725	6.21755	4.36073	303616	0	0.116519	151.861	0	0	0.00801449	0.253907		0	223.345	0	0	0	98.639	102.264	89.3343	0	0.988728	0	0	0	3.69435	9.29978	0	0	0	288.873
72	2001	2015	1	0	0	0.341015	6.23348	4.68661	281134	0	0.126181	151.881	0	0	0.00767693	0.247319		0	233.545	0	0	0	98.2636	95.42	89.8073	0	0.98974	0	0	0	3.81719	9.77183	0	0	0	307.179
72	2002	2015	1	0	0	0.344305	6.24942	5.01249	258652	0	0.135842	151.901	0	0	0.00733938	0.24073		0	243.745	0	0	0	97.8883	88.5755	90.2803	0	0.990751	0	0	2669.69	3.94002	10.2439	0	0	0	325.485
72	2003	2015	1	0	0	0.347596	6.26535	5.33838	236170	0	0.145504	151.921	0	0	0.00700182	0.234141		0	253.945	0	0	0	97.5129	81.7311	90.7533	2.49091	0.991763	0	0	6195.61	4.06285	10.7159	0	0	0	343.791
72	2004	2015	1	0	0	0.350886	6.28129	5.66426	213688	0	0.155165	151.94	0.091682	0	0.00666426	0.227552		0	264.145	1157.15	0	273.691	97.1375	74.8866	91.2263	6.51818	0.992774	1.17998	0	9721.53	4.18568	11.188	0	0	3.73837	362.096
72	2005	2015	1	0	0	0.354176	6.29722	5.99015	191206	187555	0.164827	151.96	0.18749	0	0.0063267	0.220963		0	274.345	2359.62	2555.24	706.709	96.7622	68.0422	91.6993	10.5455	0.993785	10.0999	0	13247.5	4.30851	11.66	0	2.30206	11.6466	380.402
72	2006	2015	1	0	0	0.334865	6.41312	5.85478	112.5	519279	0.206055	151.23	0.122991	16700	0.00598914	0.214374		4190.37	250	679	321	1650	95.29	0	95.8	23	1.00809	24.7269	0	16773.4	4.43134	12.1321	0	6.78591	19.5548	398.708
72	2007	2015	1	0	0	0.346314	6.37802	6.65873	618352	618352	0.20215	153.84	0.127665	12781.6	0.00565159	0.207785		4378.34	386	1300	334	1300	99	72.7	88.89	23	0.970124	34.572	0	19894	4.78	11.5385	0	12.4536	31.9935	1186.22
72	2008	2015	1	0	0	0.386483	6.35696	7.1826	112.6	757929	0.20965	148.36	0.138784	32727.8	0.00531403	0.201196		5397.27	268	2100	350	1300	96.6	74.03	87.91	25	0.962246	37.7795	0	25056.2	4.66	9.3334	0	15.0011	36.5581	760.747
72	2009	2015	1	0	0	0.410482	6.31723	7.23985	111.9	879280	0.228255	150.14	0.994072	52674.1	0.00497647	0.194607		8599.24	117	4210	320	880	96.57	90	98	27.8	1.0504	38.3418	0	27869.2	5	14.8654	0	19.0892	41.5732	149.406
72	2010	2015	1	0	0	0.396009	6.30807	7.7323	113.5	1040310	0	152.53	0.992198	52581	0.00491337	0.209584		11230	142	4210	6924	1000	99.2	60	100	30.2	0.983265	44.6574	0	30809.9	4.78	15.0816	0	20.1399	47.9315	37.3906
72	2011	2015	1	0	0	0.392779	6.29433	8.11514	112.1	1337454	0.270439	155.3	0.990985	79788	0.0037417	0.182489		11670	233	31400	293640	2800	73.42	0	93	37.1	1.01005	43.2161	0	36150	4.84	16.1384	944199	31.5863	55.8251	157.951
72	2012	2015	1	0	0	0.270497	6.36118	8.66639	111.5	1584544	0.266864	154.2	1.00389	103345	0.00345458	0.149409		15409.9	1146	17911	32570	9441	94.74	0	92.79	0	0.973886	97.5447	0	38863.3	4.84	17.4603	1.15767e+06	36.0014	66.4454	107.473
72	2013	2015	1	0	0	0.408362	6.35588	8.78841	109.8	1829501	0.263624	154.2	1	130567	0.00457142	0.160631		20128.8	248	14749	29560	7760	106.45	0	92.81	55.9	1.03351	87.8979	0	38042.8	5.16	17.5603	1.23998e+06	39.8153	74.8643	20.5539
72	2014	2015	1	0	0	0.360363	6.45106	8.8209	108	2010289	0.276826	153.3	1.00326	152950	0.00362883	0.154938		30080.1	249	10543	359788	2765	93.7	0	92.82	50	1.02717	82.5935	0	37805.8	5.4854	16.8204	1.34561e+06	44.9523	82.9222	129.915
72	2015	2015	1	1	1	0.405115	6.50818	8.89415	108	2170391	0.271979	149.77	1.01188	159094	0.0026237	0.158421		34587	553	10326	0	2799	98.64	0	100	0	1.01763	85.7408	0	51197	5.6866	13.9138	1.47219e+06	47.3574	90.4666	1389
72	2016	2015	1	1	1	0.401835	6.57699	9.44665	108.1	2398058	0.254922	150	1	225025	0.00245008	0.16229		39450	99	7891	0	4658	86	0	97.89	109.8	0.962013	122.741	0	55971.3	5.8371	14.5709	1.72664e+06	48.074	101.919	1055.24
72	2017	2015	1	1	1	0.393661	6.48842	9.90075	0	2.56615e+06	0.280766	152.198	1.33719	212244	0.00227601	0.141896		38561.2	396.745	16789.3	129046	5902.93	92.2578	0	97.3753	58.8727	1.00592	117.139	0	55558.5	5.78248	17.3245	2.00552e+06	56.1082	106.545	600.072
72	2018	2015	1	1	1	0.396951	6.50436	10.2266	0	2.76437e+06	0.290428	152.218	1.433	232191	0.00193845	0.135308		42183.2	406.945	17991.8	139587	6335.95	91.8825	0	97.8483	62.9	1.00693	126.059	0	59084.4	5.90531	17.7966	2.22677e+06	60.5921	114.453	618.378
72	2019	2015	1	1	1	0.400242	6.52029	10.5525	0	2.96258e+06	0.30009	152.238	1.52881	252137	0.00160089	0.128719		45805.2	417.145	19194.2	150128	6768.96	91.5071	0	98.3213	66.9273	1.00795	134.979	0	62610.4	6.02814	18.2686	2.44802e+06	65.0759	122.361	636.683
73	2000	2015	1	0	0	0.44616	5.80766	7.2903	1.66342e+06	0	0.474193	458.367	0	0	0.00184452	0.18003		0	2348.74	39966.1	404794	117998	66.7241	65.6074	46.0845	0	1.00343	0	0	0	4.78808	0	0	0	0	0
73	2001	2015	1	0	0	0.463187	5.83106	7.62561	1.54022e+06	0	0.467661	459.145	0	0	0.0019893	0.182354		0	2312.36	40921.2	514251	110429	67.68	61.31	49.9418	0	1.00448	0	0	0	5.1713	0	0	0	4.21083	0
73	2002	2015	1	0	0	0.480214	5.85446	7.96091	1.41701e+06	0	0.46113	459.924	0	0	0.00213407	0.184679		0	2275.99	41876.2	623708	102861	68.6359	57.0126	53.7992	0	1.00552	5.62708	0	2632.92	5.55452	0	0	0	21.6812	0
73	2003	2015	1	0	0	0.497241	5.87786	8.29621	1.2938e+06	0	0.454599	460.702	0.0279711	0	0.00227884	0.187003		0	2239.62	42831.3	733165	95291.9	69.5918	52.7153	57.6565	0	1.00657	16.4275	0	5758.05	5.93774	0	0	0	39.1516	0
73	2004	2015	1	0	0	0.514268	5.90126	8.63151	1.17059e+06	759194	0.448068	461.48	0.120587	0	0.00242362	0.189327		0	2203.25	43786.4	842622	87723.3	70.5477	48.4179	61.5139	0	1.00762	27.2279	0	8883.18	6.32095	0	0	22.0522	56.622	0
73	2005	2015	1	0	0	0.531295	5.92466	8.96681	1.04738e+06	1.59405e+06	0.441537	462.258	0.213203	0	0.00256839	0.191652		0	2166.87	44741.4	952079	80154.7	71.5036	44.1205	65.3713	0	1.00866	38.0284	0	12008.3	6.70417	0	0	58.5357	74.0923	0
73	2006	2015	1	0	0	0.492187	5.99811	9.3485	113.3	2811095	0.385615	457.54	0.145823	95100	0.00271316	0.193976		13658.7	1239	31169	192214	85729	39.8	17.01	82	58.464	0.980417	56.8192	205	15133.4	7.08739	0	0	95.0192	91.5627	3926.28
73	2007	2015	1	0	0	0.473579	5.97116	9.42155	3388327	3388327	0.388392	462.53	0.153893	86893	0.00285793	0.1963		16475.5	2421	33476	221132	88342	71.12	31.7	60.7	83.158	1.01003	69.9945	140	18998.2	7.88	23.6276	0	131.569	120.997	17960.6
73	2008	2015	1	0	0	0.473567	5.96741	9.98339	111	4049030	0.404788	466.45	0.160103	142344	0.00300271	0.198625		20302.3	2455	33740	223202	89142	72.21	33.42	60.95	80.306	1.01491	70.3054	105	21918.9	7.93	27.492	0	154.773	132.597	76002.6
73	2009	2015	1	0	0	0.791488	6.00513	10.4418	114.5	4503368	0.444356	470.02	0.995724	197796	0.00314748	0.200949		29923.8	1934	63059	1719289	7850	97.29	41.03	70.02	88.877	0.976788	51.3126	307	23943.4	8.34	26.8056	0	190.269	141.578	133029
73	2010	2015	1	0	0	0.65144	6.03776	10.6696	115.1	5372243	0.465541	466.16	1.00414	212785	0.00286948	0.199589		34316.3	2547	74851	2134817	8888	99.16	78.54	100	128.569	1.05436	93.2843	2432	26895.3	8.4	28.2166	0	238.67	154.695	182435
73	2011	2015	1	0	0	0.661011	6.05932	10.9953	115	6598977	0.460556	468.5	0.997439	277767	0.00308907	0.196601		42508.4	1424	67853	2986243	20095	99.34	0	100	170	1.02772	96.9018	3416	30224.6	8.66	26.3871	1.09901e+06	296.131	170.832	251696
73	2012	2015	1	0	0	0.766911	6.06454	11.3499	112.6	7522228	0.442156	468.5	1	328017	0.00391696	0.222476		52409.7	1615	56912	3671769	13791	95.16	0	100	210	1.04765	87.4595	3967	34030.4	8.97	27.1215	1.26551e+06	334.259	186.916	405048
73	2013	2015	1	0	0	0.726991	6.09105	11.6149	110	8351436	0.40235	470.4	0.998087	386177	0.00442998	0.21851		67240.3	3368	66405	3188006	21460	74.33	0	100	226	1.04496	159.542	4104	38911.3	9.55	39.7867	2.1237e+06	362.949	205.519	508390
73	2014	2015	1	0	0	0.692901	6.13589	12.0443	108.5	9196124	0.367503	471.7	0.998516	459637	0.00413132	0.21185		91918.5	1758	44993	3360364	17447	33.54	0	100	296	1.034	175.332	4194	41000.6	10.2069	40.7925	1.52277e+06	392.795	228.6	552808
73	2015	2015	1	1	1	0.605943	6.18076	12.3757	107.9	10056146	0.340508	467.39	1.00415	566985	0.00432167	0.200413		113197	1337	41366	0	14714	83.84	0	100	410	0.997024	124.54	5484	35360	10.7794	286.108	1.80629e+06	417.306	258.386	533496
73	2016	2015	1	1	1	0.63199	6.20439	12.52	107.8	10786241	0.324089	467	1	642182	0.00332751	0.222283		129886	1337	41366	0	14714	83.84	0	100	564	0.976455	145.65	5011	51933.6	11.2345	15.5205	1.91612e+06	438.064	276.377	265648
73	2017	2015	1	1	1	0.735616	6.20544	12.9904	0	1.16124e+07	0.363164	471.595	1.32459	641407	0.00430566	0.219543		125199	1730.4	56202.2	2.26556e+06	0	82.9745	0	111.66	474.369	1.02121	167.634	6313.29	49509.8	11.3028	115.61	2.44136e+06	496.338	283.737	581377
73	2018	2015	1	1	1	0.752643	6.22884	13.3257	0	1.24472e+07	0.356633	472.373	1.41721	696858	0.00445043	0.221868		136796	1694.03	57157.3	2.37502e+06	0	83.9305	0	115.517	518.349	1.02226	178.434	6920.58	52635	11.686	126.778	2.70827e+06	532.821	301.207	633872
73	2019	2015	1	1	1	0.76967	6.25224	13.661	0	1.32821e+07	0.350102	473.151	1.50982	752309	0.00459521	0.224192		148392	1657.65	58112.3	2.48448e+06	0	84.8864	0	119.374	562.329	1.02331	189.234	7527.87	55760.1	12.0692	137.946	2.97518e+06	569.305	318.678	686367
74	2000	2015	1	0	0	0.462633	5.60546	4.30543	1.02341e+06	0	0.228889	311.029	0	0	0.00116987	0.058713		0	6451.62	54707.2	0	32982.2	81.5461	91.714	64.6654	0	1.01939	217.321	0	0	8.68818	16.2135	0	0	0	153182
74	2001	2015	1	0	0	0.485682	5.64789	4.70198	947610	0	0.245039	310.861	0	0	0.00147353	0.0667994		0	6027.36	52066	0	31495.8	82.6782	85.5709	66.8209	0	1.01899	221.406	0	0	8.91244	17.955	0	0	0	150416
74	2002	2015	1	0	0	0.508731	5.69031	5.09853	871810	0	0.26119	310.693	0	0	0.00177719	0.0748859		0	5603.11	49424.8	29163.2	30009.4	83.8103	79.4278	68.9765	0	1.0186	225.492	0	0	9.13671	19.6965	0	0	3.50026	147650
74	2003	2015	1	0	0	0.531779	5.73274	5.49508	796010	0	0.277341	310.525	0.0861944	0	0.00208085	0.0829724		0	5178.85	46783.7	58472.2	28523	84.9424	73.2847	71.132	0	1.0182	229.577	0	2640.85	9.36098	21.438	0	0	16.7852	144883
74	2004	2015	1	0	0	0.554828	5.77516	5.89163	720210	396088	0.293491	310.357	0.173402	0	0.00238451	0.0910589		4529.6	4754.6	44142.5	87781.2	27036.6	86.0745	67.1416	73.2875	0	1.0178	233.663	0	6174.79	9.58525	23.1795	0	0	30.0701	142117
74	2005	2015	1	0	0	0.577877	5.81759	6.28818	644410	913974	0.309642	310.19	0.26061	546.196	0.00268818	0.0991454		9886.2	4330.35	41501.3	117090	25550.2	87.2065	60.9985	75.4431	0	1.0174	237.748	0	9708.73	9.80951	24.9209	0	19.9089	43.3551	139350
74	2006	2015	1	0	0	0.635041	5.92403	6.3947	113.3	1664814	0.326763	306	0.201895	51100	0.00299184	0.107232		9291.45	3162	35000	213600	22700	82.7	7.45	70.21	67.174	1.03751	228.032	115	13242.7	10.0338	26.6624	0	41.3912	56.64	136584
74	2007	2015	1	0	0	0.654937	5.86986	7.35067	2084596	2084596	0.357383	307.41	0.204125	76908.4	0.0032955	0.115318		12043.3	4287	34169	38496	22298	90.01	64.02	100	70.312	1.0291	269.832	1600	16999.5	9.81	23.35	0	74.4618	73.4612	90457.2
74	2008	2015	1	0	0	0.403466	5.85815	7.5333	111	2335589	0.344153	310.37	0.207655	115090	0.00359916	0.123405		17012	3583	34258	47725	18509	90.05	57	72	68.987	0.974954	255.356	343	21499.7	9.97	29.2514	0	75.8901	78.6469	86764.6
74	2009	2015	1	0	0	0.741555	6.02093	8.14646	114.5	2704803	0.33862	312.73	0.996227	153271	0.00390282	0.131491		43914.1	2790	32153	61239	13712	94.2	74.34	75.71	110.091	0.967774	247.691	0	23352.3	11.87	34.9571	0	87.0918	101.264	120830
74	2010	2015	1	0	0	0.836424	6.04753	8.15908	115.1	3218678	0.380622	310.89	1.00296	167267	0.00230843	0.0811359		48015.3	2783	35365	71559	19667	93.04	62.73	75.59	138.883	1.02861	255.386	1810	26947.4	11.46	34.7215	0	115.676	110.164	129178
74	2011	2015	1	0	0	0.691136	6.08331	8.64746	115	4035362	0.407274	311.3	0.999358	227658	0.0052723	0.157654		50036.9	1197	26065	107284	26821	94.81	0	100	198.051	1.05171	256.624	2311	31429.2	10.54	38.4914	1.2002e+06	157.369	121.912	167496
74	2012	2015	1	0	0	0.700855	6.09849	8.88838	112.6	4686575	0.434774	311.7	0.999358	268374	0.00530895	0.211035		51530	399	21111	1124212	18239	99.31	0	96.31	240	0.991513	236.953	3708	34180	10.81	37.213	1.34193e+06	187.508	133.29	181865
74	2013	2015	1	0	0	0.865925	6.14731	9.24543	110	5187500	0.494053	310.2	1.00258	304621	0.00653633	0.19221		54109	364	20930	1015843	17310	100	0	96.98	270	1.0549	290.177	4678	36962.7	12.3	40.5331	1.19566e+06	207.068	145.09	179944
74	2014	2015	1	0	0	0.628441	6.21674	9.90082	108.5	5661920	0.484094	310.1	1.00032	347836	0.00646469	0.175438		56173.6	329	18151	542430	10260	100	0	97	340	1.03468	291.935	5608	39220.3	11.8683	41.8949	1.5649e+06	219.547	163.037	210592
74	2015	2015	1	1	1	1.05824	6.24896	10.4127	107.9	6054300	0.46628	305.31	1.00793	408176	0.00497803	0.167428		58323	407	18807	0	9003	99	0	91.8	390	1.02809	271.835	3776	45681.9	12.0476	43.2678	1.68157e+06	229.044	176.591	34740
74	2016	2015	1	1	1	0.661853	6.27819	10.6632	107.8	6600100	0.437993	305	1	405661	0.00495354	0.161959		61835	332	6188	0	4431	90.87	0	96.54	461	0.966285	281.055	1680	50520.3	11.9966	38.7262	1.81282e+06	241.786	193.616	11816.6
74	2017	2015	1	1	1	0.854464	6.32669	11.0468	0	7.12861e+06	0.503451	308.176	1.3071	458720	0.00633211	0.196183		74165.4	0	9807.24	468798	7713.42	100.792	0	101.31	458.51	1.01262	286.775	4706.89	52116	12.5007	45.8188	2.20103e+06	277.697	202.774	106153
74	2018	2015	1	1	1	0.877513	6.36911	11.4433	0	7.6465e+06	0.519601	308.008	1.39431	496901	0.00663578	0.20427		79522	0	7166.06	498107	6227.02	101.924	0	103.465	499.254	1.01222	290.86	5103.05	55650	12.725	47.5603	2.44127e+06	299.179	216.059	103387
74	2019	2015	1	1	1	0.900562	6.41154	11.8399	0	8.16439e+06	0.535752	307.84	1.48152	535082	0.00693944	0.212356		84878.6	0	4524.89	527417	4740.62	103.056	0	105.621	539.998	1.01182	294.946	5499.22	59183.9	12.9493	49.3018	2.68151e+06	320.662	229.344	100620
75	2000	2012	1	0	0	0.0198939	6.99299	5.31894	3.48997e+07	0	0.478196	675.872	0.731207	0	0	0.0743047		0	25333.9	112300	1.35017e+06	12507.5	39.4164	78.7514	0	0	1.00258	2416.03	136064	17868	30.7951	206.293	0	1438.25	0	4.31776e+07
75	2001	2012	1	0	0	0.02098	7.01761	5.91332	3.23145e+07	0	0.467689	686.195	0.750949	0	0	0.0807263		0	24840.4	106769	1.32156e+06	12185.9	42.1109	72.7973	0	0	1.00336	2611.69	163054	21057	42.8084	235.117	0	1650.31	0	4.4757e+07
75	2002	2012	1	0	0	0.0220662	7.04223	6.50769	2.97294e+07	66980.1	0.457182	696.519	0.770691	779818	0	0.0871479		0	24346.8	101239	1.29296e+06	11864.3	44.8055	66.8432	4.56	331.372	1.00415	2807.35	190045	24246	54.8217	263.941	0	1862.37	252.514	4.63365e+07
75	2003	2012	1	0	0	0.0231523	7.06685	7.10206	2.71442e+07	1.39014e+07	0.446674	706.842	0.790433	1.75337e+06	0	0.0935696		16574.4	23853.2	95708.1	1.26435e+06	11542.7	47.5	60.8891	10.2873	764.507	1.00494	3003.01	217035	27434.9	66.8351	292.765	0	2074.43	979.655	4.79159e+07
75	2004	2012	1	0	0	0.0242385	7.09147	7.69643	2.45591e+07	2.77359e+07	0.436167	717.165	0.810175	2.72692e+06	0	0.0999912		59033.9	23359.6	90177.5	1.23575e+06	11221.1	50.1945	54.935	16.0145	1197.64	1.00573	3198.67	244026	30623.9	78.8484	321.589	0	2286.49	1706.8	4.94953e+07
75	2005	2012	1	0	0	0.0253246	7.11609	8.29081	2.19739e+07	4.15704e+07	0.42566	727.488	0.829917	3.70048e+06	0	0.106413		101493	22866	84646.9	1.20714e+06	10899.4	52.8891	48.9809	21.7418	1630.78	1.00652	3394.33	271016	33812.9	90.8617	350.413	0	2498.55	2433.94	5.10748e+07
75	2006	2012	1	0	0	0.0254109	7.14632	9.03565	114.1	60738277	0.40649	760.72	0.691976	4270800	0.00428583	0.112835		168711	20445	124765	1719968	16175	91.13	71.67	85.06	2340	1.00597	3329.74	292339	37001.9	102.875	379.237	0	2710.61	3161.08	5.26542e+07
75	2007	2012	1	0	0	0.0254664	7.17111	9.36068	71091814	71091814	0.403223	773.48	0.896662	5.64758e+06	0.00934762	0.119256		185864	21103	100900	1630300	16100	100	74.15	82.35	1945	1.03196	4002.7	328579	40561	121.65	399.045	0	2806.7	4152.47	5.58841e+07
75	2008	2012	1	0	0	0.0237839	7.18541	10.2056	110.4	82158151	0.398623	784.14	0.898016	6.62113e+06	0.0144094	0.125678		210145	21103	0	0	0	0	0	0	2290	0.963483	4184.12	362277	43155.8	125.18	419.985	0	3021	4578.82	5.37553e+07
75	2009	2012	1	0	0	0.0255569	7.2261	10.9563	109.7	91382135	0.378648	794.62	0.993418	7.59469e+06	0.0194712	0.132099		265985	26023	86100	1806500	11900	92.35	0	0	2801.9	0.997471	4459.48	377339	47088.9	131.72	436.028	0	3237.87	5287.82	4.98474e+07
75	2010	2012	1	0	0	0.0248695	7.23338	11.0883	112.4	107500000	0.377051	806.14	0.992855	8726470	0.0326791	0.115248		326357	26023	0	0	0	0	0	0	2501.3	1.04539	4493.69	397862	50165.4	140.04	472.05	0	3684.71	6036.63	6.4662e+07
75	2011	2012	1	0	0	0.0436773	7.24608	11.4002	110	124200000	0.373001	543.4	0.991903	9794800	0.018819	0.148428		341220	24580	65900	0	15300	94.87	0	0	5697.3	0.999606	3952.42	427000	50197.5	167.33	566.043	1.03171e+07	3997.38	6674.23	6.55288e+07
75	2012	2012	1	1	1	0.0534959	7.2881	12.3873	108.2	135500000	0.352265	822.3	0.995257	11023961	0.0387874	0.166337		375839	0	0	0	0	0	0	80.38	5630	1.05842	4607.3	474312	57473.4	178.15	751.351	1.1438e+07	4019.04	7335.56	6.29611e+07
75	2013	2012	1	1	1	0.037017	7.31061	12.9302	108.5	154200000	0.344906	832.3	0.993993	11418044	0.0390952	0.183205		444730	22558	63331	3114074	11008	95.17	0	91.23	7660	0.993229	4751.94	480385	61189.8	195.34	601.41	1.15007e+07	4337.18	8267.51	6.10943e+07
75	2014	2012	1	1	1	0.026805	7.32678	13.8585	107.8	167100000	0.337992	842.4	0.994065	12431035	0.0392148	0.159477		488950	19181	56527	3119780	10006	94.47	0	86.8	6450	1.00329	5361.1	510707	60393.9	205.215	326.398	1.16826e+07	4548.52	8864.65	6.52452e+07
75	2015	2012	1	1	1	0.0330804	7.36332	14.2265	108	181004136	0.319173	854.19	0.993105	13494742	0.0513214	0.166158		540595	18608	47846	0	9227	95.15	0	95.24	4250	1.0043	5591.07	541634	65115.1	207.307	693.199	1.38597e+07	4594.16	9744.44	6.68829e+07
75	2016	2012	1	1	1	0.0310928	7.40461	14.9781	107.5	195474420	0.297402	870	0.990805	13936442	0.0581118	0.16565		570359	19326	20726	0	8951	96.48	0	96.1	4960	1.02065	5517.67	570120	70071.1	217.552	712.181	1.52869e+07	4522.86	10661.5	6.75504e+07
75	2017	2012	1	1	1	0.0383583	7.41152	15.4233	0	2.07584e+08	0.299572	851.365	1.06682	1.53831e+07	0.0599656	0.183473		611008	16943.1	18279.5	863881	7040.02	85.2236	0	90.4691	6828.4	1.01598	5742.25	594903	72080.5	235.022	696.301	1.83631e+07	5043.27	11159.6	7.00281e+07
75	2018	2012	1	1	1	0.0394444	7.43614	16.0177	0	221418439	0.289065	861.688	1.08656	1.63567e+07	0.0650273	0.189894		653467	16449.5	12748.9	835276	6718.4	87.9182	0	96.1964	7261.54	1.01677	5937.91	621893	75269.5	247.035	725.125	2.03548e+07	5255.33	11886.8	7.16075e+07
75	2019	2012	1	1	1	0.0405306	7.46075	16.612	0	2.35253e+08	0.278558	872.011	1.1063	1.73302e+07	0.0700891	0.196316		695927	15955.9	7218.24	806671	6396.78	90.6127	0	101.924	7694.67	1.01756	6133.57	648884	78458.5	259.048	753.949	2.23465e+07	5467.39	12613.9	7.31869e+07
76	2000	2015	1	0	0	0.586497	5.81757	5.35435	1.65942e+06	0	0.354875	442.908	0	0	0.000199817	0.29312		0	17432.9	128625	1.16799e+06	57227.5	79.7938	15.8634	0	0	1.02036	155.036	18830.3	0	7.97202	9.67523	0	14.8245	0	40878.3
76	2001	2015	1	0	0	0.587608	5.84278	5.82115	1.53651e+06	0	0.359118	450.155	0	0	0.000538437	0.291993		0	16819.7	121221	1.19646e+06	57124.8	80.59	15.1073	5.19364	0	1.01903	162.262	17855	0	8.33286	11.7551	0	33.1385	0	48190.1
76	2002	2015	1	0	0	0.588719	5.868	6.28795	1.4136e+06	0	0.363362	457.401	0	0	0.000877056	0.290866		0	16206.6	113816	1.22492e+06	57022.1	81.3862	14.3512	12.1922	0	1.01771	169.489	16879.7	1298.62	8.6937	13.8349	0	51.4526	14.8926	55501.9
76	2003	2015	1	0	0	0.58983	5.89321	6.75475	1.29069e+06	575734	0.367605	464.647	0	0	0.00121568	0.289739		0	15593.5	106412	1.25339e+06	56919.4	82.1824	13.5951	19.1907	0	1.01638	176.716	15904.4	4143.65	9.05454	15.9148	0	69.7666	34.9518	62813.7
76	2004	2015	1	0	0	0.590941	5.91843	7.22155	1.16778e+06	1.26121e+06	0.371848	471.893	0.0755251	0	0.0015543	0.288612		0	14980.3	99007.8	1.28185e+06	56816.7	82.9785	12.839	26.1893	0	1.01506	183.942	14929	6988.68	9.41539	17.9947	0	88.0806	55.0109	70125.5
76	2005	2015	1	0	0	0.592052	5.94364	7.68835	1.04486e+06	1.94669e+06	0.376092	479.139	0.172248	34682.8	0.00189292	0.287484		4221.71	14367.2	91603.5	1.31032e+06	56713.9	83.7747	12.0829	33.1878	0	1.01373	191.169	13953.7	9833.71	9.77623	20.0745	0	106.395	75.0701	77437.3
76	2006	2015	1	0	0	0.579576	5.9894	7.6114	113.5	2651941	0.335038	478.89	0.109274	109700	0.00223154	0.286357		14956.3	7499	62071	453763	55857	88.64	0	0	60.707	0.96173	155.299	4710	12678.7	10.1371	22.1544	0	124.709	95.1293	84749.1
76	2007	2015	1	0	0	0.653583	5.95583	8.53424	3380180	3380180	0.377228	491.59	0.10645	108643	0.00257015	0.28523		15590.3	15223	88084	1090109	65484	86.75	0	100	83.695	1.0383	208.216	9520	18166.5	10.69	26.1051	0	131.05	119.76	87248.3
76	2008	2015	1	0	0	0.597139	5.99655	9.21227	112.8	3985273	0.385068	501.86	0.112561	145623	0.00290877	0.284103		22006.5	15709	91011	1089693	57753	85.27	0	54.95	111.706	0.981335	239.783	13321	19391.8	10.94	27.7648	0	152.524	132.73	107475
76	2009	2015	1	0	0	0.567975	6.07399	10.0458	113.9	4377331	0.416258	509.69	0.992329	182603	0.00324739	0.282976		29018.5	15196	75157	739143	57932	86.62	0.16	47.41	141	1.04682	256.708	13551	21288.7	11.08	30.1817	0	173.247	150.811	93079.7
76	2010	2015	1	0	0	0.564461	6.11129	10.4601	114.2	5446571	0.455798	523.81	0.986522	214402	0.00170927	0.285762		38529.2	15762	66744	903484	57050	90.79	82.85	49.98	169.454	1.02488	248.122	15622	24120.3	11.51	31.7313	0	228.535	173.381	108345
76	2011	2015	1	0	0	0.614534	6.07488	10.488	112.3	6308187	0.419276	527.7	0.996399	216897	0.00331396	0.274351		43002.2	4715	25668	4288797	28084	85.05	0	85.28	218.8	1.05114	229.244	21029	24648.4	11.75	29.2057	926384	231.017	198.731	153597
76	2012	2015	1	0	0	0.602779	6.11476	10.8536	111.3	6791828	0.402508	529.9	0.997924	265733	0.00451749	0.269089		55224	13267	20663	2624446	54924	83.07	0	97.88	265.2	0.984615	205.563	1692	25536.7	11.84	29.7975	1.07467e+06	232.712	218.894	124367
76	2013	2015	1	0	0	0.638773	6.11274	11.1586	110.2	7420091	0.408822	538.2	0.992196	312222	0.00715633	0.284749		49626	9936	20506	2521452	52976	79.14	0	92.8	311.8	1.00037	221.296	2035	30925	13.02	33.838	1.16542e+06	251.675	230.558	113678
76	2014	2015	1	0	0	0.485467	6.20849	12.1261	108.5	8053951	0.404162	543.2	0.995398	364513	0.00727333	0.294553		54716.9	3501	22310	2581313	73155	94.7	0	98.67	312.9	0.971521	283.9	2200	33597.5	13.409	35.7567	1.19688e+06	264.804	259.563	152915
76	2015	2015	1	1	1	0.618533	6.20421	12.272	108.1	8652035	0.402795	548.94	0.994754	425671	0.00624693	0.273336		68967	3243	24007	0	73541	98.03	0	100	394.4	1.03571	273.129	2530	42238.1	13.3694	43.1549	1.49513e+06	279.569	274.919	161174
76	2016	2015	1	1	1	0.663078	6.20206	12.6187	107.3	9587564	0.410113	555	0.994595	476194	0.0019958	0.267431		84169	13522	22736	0	40318	96.01	0	100	471.6	0.967179	258.562	2910	43350.9	13.6087	48.4006	1.67161e+06	309.228	295.203	147761
76	2017	2015	1	1	1	0.605384	6.24621	13.29	0	1.01724e+07	0.427012	566.093	1.33292	478445	0.00595635	0.273959		82288.4	7009.69	2752.33	1.6519e+06	55481.3	93.3289	3.00982	117.17	467.654	0.997833	277.889	2249.91	43974.1	14.1063	45.0329	1.92432e+06	326.163	315.78	165179
76	2018	2015	1	1	1	0.606495	6.27143	13.7568	0	1.08579e+07	0.431255	573.34	1.42964	515425	0.00629497	0.272832		88794	6396.56	0	1.68037e+06	55378.6	94.1251	2.25373	124.169	507.092	0.996508	285.116	1274.59	46819.1	14.4672	47.1127	2.13729e+06	344.477	335.84	172491
76	2019	2015	1	1	1	0.607606	6.29664	14.2236	0	1.15433e+07	0.435498	580.586	1.52636	552405	0.00663359	0.271705		95299.5	5783.44	0	1.70883e+06	55275.9	94.9213	1.49764	131.167	546.53	0.995184	292.343	299.273	49664.1	14.828	49.1926	2.35025e+06	362.791	355.899	179803
77	2000	2012	1	0	0	0.0969802	6.61063	4.15951	3.40558e+06	0	0.515469	323.77	0.285351	0	0	0.138861		0	3584.5	144319	1.05829e+06	23006.6	53.768	58.0197	33.9746	0	0.919478	682.897	0	0	15.0022	34.1571	0	0	0	0
77	2001	2012	1	0	0	0.098326	6.64293	4.68876	3.15332e+06	0	0.50428	328.121	0.338341	0	0	0.142149		0	3516.18	138329	1.07205e+06	22784.3	53.5264	53.8836	38.7973	0	0.926452	723.81	0	0	17.2753	41.5049	0	0	0	0
77	2002	2012	1	0	0	0.0996718	6.67522	5.21801	2.90106e+06	0	0.493091	332.472	0.39133	0	0	0.145437		0	3447.86	132338	1.08581e+06	22561.9	53.2847	49.7475	43.6199	0	0.933426	764.723	0	465.068	19.5484	48.8527	0	0	0	0
77	2003	2012	1	0	0	0.101018	6.70752	5.74726	2.64881e+06	0	0.481902	336.822	0.44432	0	0	0.148724		0	3379.55	126347	1.09957e+06	22339.5	53.0431	45.6115	48.4425	0	0.940399	805.635	0	4307.38	21.8214	56.2005	0	0	0	0
77	2004	2012	1	0	0	0.102363	6.73982	6.27652	2.39655e+06	0	0.470713	341.173	0.49731	0	0	0.152012		0	3311.23	120356	1.11333e+06	22117.2	52.8015	41.4754	53.2652	0	0.947373	846.548	0	8149.68	24.0945	63.5484	0	27.5554	0	204837
77	2005	2012	1	0	0	0.103709	6.77212	6.80577	2.14429e+06	235967	0.459524	345.523	0.550299	4320.56	0.00233955	0.1553		0	3242.91	114365	1.12709e+06	21894.8	52.5598	37.3393	58.0878	0	0.954346	887.46	0	11992	26.3676	70.8962	0	103.182	0	497159
77	2006	2012	1	0	0	0.138223	6.76576	7.44909	111.5	6028845	0.450551	354.52	0.495036	615800	0.00504469	0.158588		41335.8	4457	107289	849440	29071	48.39	24.97	0	210.2	0.995504	899.487	7010	15834.3	28.6406	78.244	0	178.809	96.8041	789481
77	2007	2012	1	0	0	0.125349	6.79238	7.90474	6937170	6937170	0.456267	359.82	0.497804	696244	0.00774983	0.161876		50047.3	3946	115484	994550	19247	53.34	36.05	90.62	235.3	0.968145	1022.33	8100	22578.7	33.58	93.1726	0	321.954	326.186	1.2868e+06
77	2008	2012	1	0	0	0.0887423	6.82097	8.1118	111.3	8110521	0.447628	363.93	0.498502	1.04221e+06	0.010455	0.165164		60157.1	2404	85273	955737	17069	46.29	32.46	93.36	272.6	0.970703	1039.62	9350	24916.1	34.15	94.837	0	359.727	361.565	1.47667e+06
77	2009	2012	1	0	0	0.090298	6.99101	9.02968	111.4	9719382	0.395951	367.08	0.995696	1.38817e+06	0.0131601	0.168451		78279.1	2356	84488	694191	13831	45.83	44.27	95.04	391.818	0.994145	1035.72	11220	26226.1	36.56	97.2687	0	375.711	500.948	1.17641e+06
77	2010	2012	1	0	0	0.0870956	6.99244	9.60483	112.8	11218174	0.377637	337.16	1.09776	1363034	0.0176509	0.172713		101910	2380	84508	1042180	12601	56.17	0	96.2	507.911	0.963624	1108.72	13470	28655.8	35.92	116.99	0	420.621	559.52	1.41796e+06
77	2011	2012	1	0	0	0.100056	6.98632	9.77932	115	13830724	0.375938	376.1	0.996012	1870940	0.0182154	0.174405		141662	1986	81625	2034121	30892	56.2	0	94.68	682.4	0.962948	1148.67	27874	33777	36.14	76.52	2.42265e+06	512.545	640.832	2.12638e+06
77	2012	2012	1	1	1	0.10892	7.00552	10.4424	113.6	17003048	0.376197	374.5	1.00214	2411920	0.0188559	0.179216		211144	2009	65259	1045924	19743	59.1	0	97.71	807.7	0.986514	1117.06	47415	36316.8	37.8	123.174	2.97371e+06	610.665	775.236	2.71422e+06
77	2013	2012	1	1	1	0.102876	7.05459	11.0387	112.5	20854252	0.375415	379.1	0.993933	2772077	0.02379	0.18059		267064	2262	70602	3079328	22024	60.75	0	97.4	936.3	0.987678	1205.29	63000	42165.1	44.97	143.499	1.81841e+06	704.047	958.569	3.24649e+06
77	2014	2012	1	1	1	0.122921	7.06603	11.842	110.8	24972691	0.36085	382.9	0.995038	3315962	0.0275849	0.179358		299638	2895	70533	2610740	29669	48.86	0	99.65	1054.4	1.03462	1132.69	76174	48261	49.7201	149.815	3.64928e+06	794.46	1149.13	3.91843e+06
77	2015	2012	1	1	1	0.134674	7.07383	11.9222	110.7	28911600	0.349372	391.79	0.988667	3741476	0.0289036	0.195948		280445	2700	57192	0	23545	48.15	0	95.13	1161.5	1.05541	1303.13	92740	51299.7	50.7725	147.871	4.03921e+06	889.212	1325.93	4.55746e+06
77	2016	2012	1	1	1	0.130468	7.07606	12.6695	110.5	31577001	0.350477	401	0.990025	3663181	0.0328638	0.18899		326073	3768	40373	0	8475	39.13	0	97.47	1236.46	1.03876	1449.58	111988	55473.5	51.8119	143.422	4.13102e+06	958.604	1417.04	2.05169e+06
77	2017	2012	1	1	1	0.119859	7.15969	13.1568	0	3.23392e+07	0.325255	397.731	1.18617	4.15586e+06	0.0348012	0.194754		362552	2423.09	42475.7	1.29222e+06	19226.5	49.6602	0	115.959	1367.16	1.03803	1378.41	108109	58099.7	53.6443	159.07	4.89364e+06	1010.7	1506.19	4.00502e+06
77	2018	2012	1	1	1	0.121204	7.19198	13.6861	0	3.50145e+07	0.314066	402.082	1.23916	4.50182e+06	0.0375063	0.198042		394830	2354.77	36484.9	1.30598e+06	19004.1	49.4185	0	120.782	1481.43	1.045	1419.32	119031	61942	55.9173	166.418	5.43731e+06	1086.33	1634.32	4.29734e+06
77	2019	2012	1	1	1	0.12255	7.22428	14.2153	0	3.76897e+07	0.302877	406.432	1.29215	4.84779e+06	0.0402115	0.20133		427107	2286.45	30494.1	1.31974e+06	18781.7	49.1769	0	125.605	1595.71	1.05198	1460.24	129953	65784.3	58.1904	173.766	5.98099e+06	1161.95	1762.44	4.58967e+06
78	2000	2013	1	0	0	0.320613	6.04307	3.84522	3.654e+06	0	0.351786	483.102	0	0	0.0142868	0.170495		0	4708	58666.6	676025	11272.9	73.8531	148.156	20.7956	0	1.05509	158.135	0	1390.93	15.0859	26.5818	0	0	0	730382
78	2001	2013	1	0	0	0.325219	6.05443	4.26696	3.38334e+06	0	0.359955	486.275	0.0277141	0	0.0140853	0.171059		0	4614.64	56569	647067	11385	74.4809	137.814	25.8618	0	1.05172	161.574	0	4083.92	15.8082	30.8705	0	21.7665	34.0611	712430
78	2002	2013	1	0	0	0.329825	6.06579	4.6887	3.11268e+06	0	0.368124	489.447	0.10503	0	0.0138838	0.171622		0	4521.27	54471.4	618109	11497.1	75.1087	127.471	30.928	0	1.04835	165.013	0	6776.91	16.5306	35.1591	0	71.9141	71.6198	694479
78	2003	2013	1	0	0	0.334431	6.07715	5.11044	2.84202e+06	1.12437e+06	0.376293	492.619	0.182345	0	0.0136823	0.172185		0	4427.91	52373.8	589151	11609.3	75.7365	117.129	35.9942	0	1.04498	168.452	0	9469.9	17.253	39.4478	0	122.062	109.178	676528
78	2004	2013	1	0	0	0.339036	6.08852	5.53219	2.57136e+06	2.6409e+06	0.384462	495.792	0.259661	22539.5	0.0134808	0.172749		0	4334.55	50276.2	560193	11721.4	76.3644	106.786	41.0604	0	1.04161	171.891	0	12162.9	17.9754	43.7365	0	172.209	146.737	658577
78	2005	2013	1	0	0	0.343642	6.09988	5.95393	2.30071e+06	4.15744e+06	0.392631	498.964	0.336977	142577	0.0132793	0.173312		556.277	4241.18	48178.6	531235	11833.5	76.9922	96.4438	46.1265	44.2553	1.03824	175.33	1922.91	14855.9	18.6978	48.0252	0	222.357	184.296	640625
78	2006	2013	1	0	0	0.344386	6.08959	6.92945	113.5	6070178	0.386856	499.29	0.357688	297000	0.0130777	0.173876		26086.6	4640	54908	354855	16367	91.62	81.25	0	157.113	1.01164	173.802	6743	17548.9	19.4202	52.3138	0	272.505	221.854	622674
78	2007	2013	1	0	0	0.36238	6.10047	7.0781	7443201	7443201	0.390644	504.62	0.236336	382652	0.0128762	0.174439		40304.6	4896	52980	431642	14320	92.25	67.16	100	209.675	1.05991	211.655	9316	21240.7	20.55	54.3036	0	317.229	269.295	602457
78	2008	2013	1	0	0	0.347407	6.13802	7.38504	112.8	8830250	0.404808	508.32	0.241265	502689	0.0126747	0.175002		48596	4083	38415	505995	10067	93.11	84.6	100	231.9	1.02928	181.634	17040	23460.8	20.72	59.5481	0	377.224	294.675	663424
78	2009	2013	1	0	0	0.342995	6.19379	7.65526	113.9	9405425	0.438046	511.63	0.996775	622727	0.0124732	0.175566		65934.7	0	0	0	0	0	63.71	55.2	361	1.05467	219.692	19308	26478	21.21	79.5336	0	391.748	333.97	476032
78	2010	2013	1	0	0	0.371046	6.19977	7.65795	114.2	11035587	0.44615	518.96	0.992928	670784	0.0103502	0.182657		90855.5	3527	48181	591446	10514	90.87	81.56	57.44	476.038	1.01214	178.794	2136	28379	21.88	68.2067	0	453.192	375.476	562541
78	2011	2013	1	0	0	0.376092	6.16606	7.78172	112.3	13360749	0.460366	521.8	0.997317	807485	0.0113433	0.171212		114053	5152	40635	870216	17036	93.3	0	68.45	507.8	0.998638	164.665	3453	29767	22.91	74.3737	2.03218e+06	544.839	408.425	539602
78	2012	2013	1	0	0	0.379703	6.16117	8.07984	111.3	14850212	0.469666	522.1	0.999617	1060087	0.0120567	0.179773		146240	4999	39191	375765	16068	87.74	0	84.43	606	0.985649	177.974	4178	31893.3	23.3	60.0551	2.22464e+06	593.772	439.04	523859
78	2013	2013	1	1	1	0.388195	6.158	8.96439	110.2	16579048	0.47824	521.8	1.00019	1110015	0.0150031	0.173524		139032	4005	36176	358175	15417	88.4	0	83.78	671.4	1.00226	185.485	5047	34657.3	25.57	84.4511	2.37758e+06	657.792	469.203	474641
78	2014	2013	1	1	1	0.43164	6.18523	9.87974	108.5	18270531	0.473467	526.5	0.995442	1238861	0.0146286	0.171527		153688	3828	32687	444258	15721	85.31	0	96.64	727	1.02799	201.9	14487	37965.5	25.9696	85.4744	2.53788e+06	703.704	519.716	471326
78	2015	2013	1	1	1	0.374689	6.21389	10.7569	108.1	19429668	0.463714	528.97	0.997637	1345258	0.00934142	0.183715		183732	3008	32204	0	12200	82.86	0	95.89	851.6	1.01775	197.709	65252	43258.5	26.2439	94.2691	2.86866e+06	722.742	563.605	461373
78	2016	2013	1	1	1	0.365515	6.24251	11.1599	107.3	20548216	0.446142	534	0.994382	1453260	0.0089467	0.182328		213162	2353	16146	0	9860	82.89	0	99.93	950.9	0.998263	262.308	16137	46503	25.5799	98.7997	3.13824e+06	720.92	610.867	464166
78	2017	2013	1	1	1	0.398912	6.23621	11.0149	0	2.23558e+07	0.490659	537.034	1.26476	1.58303e+06	0.0108611	0.180073		221568	3120.82	23007.4	183738	13179.2	84.526	0	106.921	1001.28	0.997797	216.6	27731.1	47171.8	27.3665	99.4892	3.7959e+06	824.128	635	425210
78	2018	2013	1	1	1	0.403518	6.24757	11.4366	0	2.38724e+07	0.498828	540.206	1.34208	1.70306e+06	0.0106596	0.180636		239986	3027.45	20909.8	154780	13291.3	85.1538	0	111.987	1081.03	0.994427	220.039	29881.8	49864.8	28.0889	103.778	4.21008e+06	874.276	672.559	407259
78	2019	2013	1	1	1	0.408123	6.25894	11.8583	0	2.53889e+07	0.506997	543.379	1.4194	1.8231e+06	0.0104581	0.1812		258404	2934.09	18812.2	125822	13403.5	85.7816	0	117.053	1160.78	0.991056	223.479	32032.5	52557.8	28.8113	108.067	4.62425e+06	924.423	710.117	389308
79	2000	2015	1	0	0	0.230664	6.13042	2.94659	4.78872e+06	0	0.0958039	416.978	0.037318	1900	0.0091916	0.200747		0	10271.1	90572.5	1.26821e+06	13196.5	79.549	103.925	46.2109	0	1.02605	448.747	0	1074.79	8.81297	16.3446	0	145.66	0	4.6972e+06
79	2001	2015	1	0	0	0.234132	6.15394	3.5298	4.43401e+06	0	0.119717	419.543	0.107842	1900	0.00963246	0.199367		0	10003.1	87505.6	1.27285e+06	15020.2	79.4294	96.8013	49.0163	0	1.02416	477.581	3972.74	3869.65	10.3149	23.6229	0	199.72	0	4.87613e+06
79	2002	2015	1	0	0	0.2376	6.17747	4.11301	4.07929e+06	0	0.143631	422.107	0.178366	1900	0.0100733	0.197988		0	9735.21	84438.6	1.2775e+06	16844	79.3098	89.6775	51.8216	0	1.02226	506.414	10872.8	6664.52	11.8167	30.9011	0	253.781	0	5.05507e+06
79	2003	2015	1	0	0	0.241067	6.20099	4.69623	3.72458e+06	0	0.167544	424.672	0.248891	1900	0.0105142	0.196608		0	9467.28	81371.7	1.28215e+06	18667.7	79.1902	82.5536	54.627	0	1.02036	535.248	17772.9	9459.38	13.3186	38.1793	0	307.842	64.1668	5.23401e+06
79	2004	2015	1	0	0	0.244535	6.22451	5.27944	3.36987e+06	13539.1	0.191457	427.236	0.319415	1900	0.0109551	0.195229		0	9199.35	78304.8	1.2868e+06	20491.4	79.0706	75.4298	57.4323	48.3346	1.01846	564.082	24673	12254.2	14.8205	45.4575	0	361.902	136.808	5.41295e+06
79	2005	2015	1	0	0	0.248003	6.24803	5.86265	3.01516e+06	45885.5	0.215371	429.801	0.389939	1900	0.0113959	0.193849		9061.56	8931.41	75237.8	1.29144e+06	22315.1	78.951	68.306	60.2376	121.175	1.01657	592.915	31573.1	15049.1	16.3224	52.7358	0	415.963	209.449	5.59189e+06
79	2006	2015	1	0	0	0.253169	6.29239	6.66708	113.307	86600	0.1481	417.797	0.347571	1900	0.0118368	0.192469		35061.5	7984.18	69062.6	797507	28520.8	76.1273	45.0736	59.8051	245.178	1.02953	581.313	36324	17844	17.8242	60.014	0	470.024	282.091	5.77083e+06
79	2007	2015	1	0	0	0.250735	6.30615	7.16639	9.75467e+06	101300	0.204258	422.501	0.330949	1900	0.0122776	0.19109		43879.3	8517.05	67749.6	840498	24525.4	77.0793	50.0784	65.4194	276.387	1.00117	670.163	43462.3	21081	20.34	71.5942	0	480.548	379.017	5.80806e+06
79	2008	2015	1	0	0	0.260135	6.30996	7.72608	112.221	126600	0.276	427.241	0.335398	1900	0.0127185	0.18971		54856.6	8134.07	63771.2	1.00161e+06	21683.4	78.7751	56.2903	69.1482	334.449	1.02922	717.338	52754.7	23168.2	20.9601	74.9442	0	548.718	422.795	5.88064e+06
79	2009	2015	1	0	0	0.265596	6.36275	8.07519	111.902	150500	0.289	430.016	0.999679	1900	0.0131594	0.188331		72444.9	7705.22	58580	1.03232e+06	18974.5	78.8716	59.3137	71.8611	404.53	0.999765	694.423	55218.9	26222.7	21.7966	79.7971	0	597.015	500.241	5.44026e+06
79	2010	2015	1	0	0	0.261458	6.363	8.74243	113.432	204300	0.417	435.911	0.99299	1900	0.0130497	0.175949		89042.4	7935.92	59520	1.22768e+06	18776.1	82.141	70.4389	77.0939	453.781	0.997218	741.85	64029.4	28720.6	22.5665	84.324	0	703.665	568.741	7.03306e+06
79	2011	2015	1	0	0	0.26709	6.36238	9.02372	112.374	261400	0.487	550.873	0.990383	1900	0.0141463	0.184687		99551.2	7734.08	65414.5	2.60249e+06	51294.5	76.5802	0	79.3297	537.299	1.02181	743.569	75882.7	32145	24.2132	93.1664	2.18593e+06	806.969	639.637	7.18408e+06
79	2012	2015	1	0	0	0.266736	6.37823	9.64914	110.769	305400	0.492	441.512	0.990127	1900	0.0146282	0.201541		121777	7274.26	59491.8	2.26928e+06	48979.9	78.3541	0	83.5111	602.098	0.976192	791.278	86874.7	34629.8	26.4125	102.345	2.49915e+06	862.677	693.859	7.25244e+06
79	2013	2015	1	0	0	0.28564	6.40233	10.4548	109.596	320700	0.467	441.241	0.992699	1900	0.0154208	0.186375		143483	7086.1	53915.9	2.3351e+06	38751.7	81.4615	0	74.6039	696.352	0.967319	852.035	95421	37252.1	30.2453	116.211	2.84314e+06	902.384	777.188	7.44149e+06
79	2014	2015	1	0	0	0.276394	6.45332	10.9588	108.165	361400	0.433	445.286	0.990786	1900	0.0162252	0.178112		162107	6782.45	55073	2.40613e+06	43354.9	82.5167	0	89.8465	758.307	1.01462	880.639	100278	39517.6	30.7268	120.152	2.92794e+06	922.575	861.239	7.5993e+06
79	2015	2015	1	1	1	0.293633	6.50189	11.7976	107.591	356600	0.384	444.56	0.99673	1900	0.0147798	0.177048		179568	6572.47	48701.5	0	48312.2	80.1238	0	90.4455	819.73	1.02746	858.07	93665.4	43138.7	32.28	128.96	3.37529e+06	917.443	944.597	7.16127e+06
79	2016	2015	1	1	1	0.276313	6.54838	12.7199	107.104	364800	0.35	440.133	0.97661	1900	0.0162098	0.175976		191845	4836.31	23918.7	0	22658.6	68.5373	0	86.7022	1012.29	0.992707	894.418	98799.9	46281.5	31.3048	128.947	3.58588e+06	931.577	1028.87	6.74937e+06
79	2017	2015	1	1	1	0.289615	6.53029	12.8612	0	434042	0.502331	460.576	1.23623	1900	0.0166863	0.177294		207959	5716.24	38434.7	1.34721e+06	44199.8	77.5159	0	93.9017	995.261	0.993801	938.92	114374	48587.5	34.3449	140.074	4.38781e+06	1064.69	1081.15	7.73916e+06
79	2018	2015	1	1	1	0.293083	6.55382	13.4444	0	466388	0.526244	463.14	1.30675	1900	0.0171271	0.175915		224534	5448.31	35367.7	1.35186e+06	46023.5	77.3963	0	96.7071	1068.1	0.991904	967.754	121274	51382.3	35.8468	147.353	4.86891e+06	1118.75	1153.79	7.9181e+06
79	2019	2015	1	1	1	0.296551	6.57734	14.0276	0	498735	0.550157	465.705	1.37728	1900	0.017568	0.174535		241109	5180.38	32300.8	1.35651e+06	47847.2	77.2767	0	99.5124	1140.94	0.990007	996.588	128175	54177.2	37.3487	154.631	5.35002e+06	1172.81	1226.43	8.09704e+06
80	2000	2012	1	0	0	0.0607638	6.38749	5.35692	1.19626e+07	0	0.395196	1004.38	0.232672	0	0.0429852	0.191098		0	2903.94	79221.9	1.99597e+06	49597.3	38.8373	116.895	70.11	872.652	1.02971	1091.63	0	0	62.5232	183.736	0	540.25	0	2.29226e+06
80	2001	2012	1	0	0	0.06045	6.41868	5.80606	1.10765e+07	0	0.391227	1002.61	0.289722	0	0.0408909	0.188354		0	3046.73	76912.6	1.98262e+06	50602.4	41.6409	108.755	71.1836	912.281	1.02841	1186.26	0	2668.42	63.9976	189.068	0	606.355	128.307	2.31546e+06
80	2002	2012	1	0	0	0.0601362	6.44987	6.2552	1.01903e+07	4.08218e+06	0.387257	1000.84	0.346771	185873	0.0387967	0.18561		0	3189.52	74603.4	1.96928e+06	51607.4	44.4445	100.614	72.2573	951.91	1.02711	1280.89	0	5732.69	65.472	194.401	0	672.46	303.271	2.33867e+06
80	2003	2012	1	0	0	0.0598224	6.48106	6.70434	9.30424e+06	8.19848e+06	0.383288	999.065	0.40382	491125	0.0367024	0.182867		0	3332.31	72294.1	1.95593e+06	52612.4	47.2482	92.4744	73.3309	991.54	1.02581	1375.52	0	8796.96	66.9464	199.734	0	738.565	478.235	2.36188e+06
80	2004	2012	1	0	0	0.0595086	6.51226	7.15348	8.41813e+06	1.23148e+07	0.379318	997.294	0.460869	796377	0.0346081	0.180123		0	3475.1	69984.9	1.94259e+06	53617.4	50.0518	84.3343	74.4045	1031.17	1.02451	1470.14	0	11861.2	68.4208	205.067	0	804.67	653.2	2.38508e+06
80	2005	2012	1	0	0	0.0591948	6.54345	7.60262	7.53202e+06	1.64311e+07	0.375349	995.523	0.517918	1.10163e+06	0.0325139	0.17738		24123.9	3617.89	67675.6	1.92924e+06	54622.4	52.8555	76.1942	75.4782	1070.8	1.02321	1564.77	0	14925.5	69.8952	210.4	0	870.775	828.164	2.40829e+06
80	2006	2012	1	0	0	0.0922612	6.56019	7.57387	112	20940751	0.351325	980.4	0.48266	1182900	0.0304196	0.174636		80986.6	3979	60751	1468737	65078	63.8	63.61	85	2138.11	0.993119	1701.74	31720	17989.8	71.3696	215.732	0	936.88	1003.13	2.4315e+06
80	2007	2012	1	0	0	0.0609016	6.58928	8.39032	24368044	24368044	0.352716	987.32	0.483045	1.71213e+06	0.0283253	0.171892		103055	3356	58232	1981848	60088	70.9	50.52	85	1061.32	1.04046	1871.93	37200	22104	72.84	217.487	0	902.592	1186.48	2.27972e+06
80	2008	2012	1	0	0	0.0519914	6.61177	8.83978	111.8	28681851	0.358554	989.86	0.481836	2.01739e+06	0.026231	0.169149		134128	4039	54022	1797084	59969	74.76	62.26	85	867.54	1.02237	1877.55	57341	24103.6	72.74	217.337	0	1017.54	1322.24	2.39373e+06
80	2009	2012	1	0	0	0.0569732	6.70113	9.8217	111.4	31755391	0.361564	991.6	0.999092	2.32264e+06	0.0241368	0.166405		189210	3510	51879	1519911	50271	76.3	64	53.9	946.879	0.989334	1806.48	60492	27815.8	74.77	219.342	0	1091.94	1548.53	2.07091e+06
80	2010	2012	1	0	0	0.0488455	6.73222	9.86887	112.7	36648538	0.377805	992.02	0.999788	2381428	0.0197275	0.152998		265187	3283	54000	1639587	30000	89.68	60.5	75	1213.68	1.05939	1924.96	70010	29836.5	80	217.044	0	1274.6	1719.26	2.6331e+06
80	2011	2012	1	0	0	0.0287793	6.74627	10.7251	112.3	42421894	0.388285	993.3	0.999295	3003190	0.0206506	0.15235		301197	5838	90208	0	47577	0	0	79.7	0	1.03184	2070.57	79404	31835.4	79.06	255.24	4.86604e+06	1438.7	1875.91	2.7691e+06
80	2012	2012	1	1	1	0.0249435	6.77983	11.2373	110	45502155	0.360174	993.5	0.999899	3547160	0.0198743	0.184271		394996	6497	80740	4031270	52257	0	0	85.3	1610	1.00747	2183.62	190001	35560	80.78	290.74	5.47856e+06	1395.22	2046.73	2.86415e+06
80	2013	2012	1	1	1	0.0600229	6.78029	11.2396	108	50170491	0.347601	995.2	0.999196	4022808	0.016788	0.157194		494001	4487	6598	3864927	82323	93.85	0	87.29	1516	0.976754	2333.31	226242	39170.2	81.63	289.592	5.88903e+06	1446.93	2228.67	3.36056e+06
80	2014	2012	1	1	1	0.0593539	6.811	11.3278	105.6	53400715	0.334082	987.3	1.00405	4235203	0.0135494	0.15068		417598	5188	60028	4037566	130401	98.07	0	86	1592.38	1.03043	2556.92	272125	41935.5	83.1863	248.615	6.02e+06	1451.25	2382.99	2.75667e+06
80	2015	2012	1	1	1	0.0656859	6.8375	12.0704	105.7	57512119	0.323897	961.37	1.01348	4077328	0.0110148	0.1511		459569	4809	49346	0	67433	99.8	0	91.63	1656.13	1.05402	2599.39	299426	46852.3	84.3565	248.971	6.61688e+06	1494.35	2579.93	2.38706e+06
80	2016	2012	1	1	1	0.0806733	6.8871	12.1772	106.1	61016096	0.310845	962	1	3762384	0.00871317	0.139422		504005	4235	26217	0	21781	99.29	0	87.3	1792.29	0.96424	2531.51	320730	49219.5	85.4254	246.261	6.89177e+06	1491.44	2763.58	2.07633e+06
80	2017	2012	1	1	1	0.0554292	6.91775	12.9923	0	6.58267e+07	0.327715	974.272	1.20251	4.76465e+06	0.00738259	0.144456		583864	5331.38	39964.6	1.76911e+06	66682.7	86.4991	0	88.3618	1546.35	1.0076	2700.31	345324	51696.8	87.588	274.393	8.80035e+06	1664.03	2927.73	2.68677e+06
80	2018	2012	1	1	1	0.0551154	6.94894	13.4414	0	6.9943e+07	0.323745	972.501	1.25956	5.06991e+06	0.00528832	0.141713		630509	5474.17	37655.3	1.75576e+06	67687.7	89.3027	0	89.4355	1585.98	1.0063	2794.94	377959	54761.1	89.0624	279.726	9.75019e+06	1730.14	3102.7	2.70998e+06
80	2019	2012	1	1	1	0.0548016	6.98013	13.8906	0	7.40593e+07	0.319776	970.73	1.31661	5.37516e+06	0.00319405	0.138969		677154	5616.96	35346.1	1.74242e+06	68692.7	92.1064	0	90.5091	1625.61	1.005	2889.57	410594	57825.3	90.5368	285.059	1.07e+07	1796.24	3277.66	2.73318e+06
81	2000	2015	1	0	0	0.230664	6.13042	3.96643	4.78872e+06	0	0.229418	56	0	0	0.0091916	0.200747		0	0	0	0	0	0	0	0	0	1.01122	448.747	0	1074.79	8.81297	16.3446	0	145.66	0	4.6972e+06
81	2001	2015	1	0	0	0.234132	6.15394	4.47466	4.43401e+06	0	0.250909	56	0	0	0.00963246	0.199367		0	0	0	0	0	0	0	0	0	1.0111	477.581	3972.74	3869.65	10.3149	23.6229	0	199.72	0	4.87613e+06
81	2002	2015	1	0	0	0.2376	6.17747	4.9829	4.07929e+06	0	0.2724	56	0	0	0.0100733	0.197988		0	0	0	0	0	0	0	0	0	1.01097	506.414	10872.8	6664.52	11.8167	30.9011	0	253.781	0	5.05507e+06
81	2003	2015	1	0	0	0.241067	6.20099	5.49113	3.72458e+06	0	0.293891	56	0	0	0.0105142	0.196608		0	0	0	0	0	0	0	0	0	1.01084	535.248	17772.9	9459.38	13.3186	38.1793	0	307.842	64.1668	5.23401e+06
81	2004	2015	1	0	0	0.244535	6.22451	5.99937	3.36987e+06	0	0.315382	56	0	74273.4	0.0109551	0.195229		0	0	0	0	0	0	0	0	48.3346	1.01072	564.082	24673	12254.2	14.8205	45.4575	0	361.902	136.808	5.41295e+06
81	2005	2015	1	0	0	0.248003	6.24803	6.5076	3.01516e+06	65872.3	0.336873	56	0	252885	0.0113959	0.193849		0	0	0	0	0	0	0	0	121.175	1.01059	592.915	31573.1	15049.1	16.3224	52.7358	0	415.963	209.449	5.59189e+06
81	2006	2015	1	0	0	0.253169	6.29239	7.02221	113.307	776355	0.333	56	0	480916	0.0118368	0.192469		3205	0	0	0	0	0	0	0	245.178	1.00994	581.313	36324	17844	17.8242	60.014	0	470.024	282.091	5.77083e+06
81	2007	2015	1	0	0	0.250735	6.30615	7.52191	9.75467e+06	919912	0.346	56	0	610110	0.0122776	0.19109		3971	0	0	0	0	0	0	0	276.387	1.01072	670.163	43462.3	21081	20.34	71.5942	0	480.548	379.017	5.80806e+06
81	2008	2015	1	0	0	0.260135	6.30996	8.04177	112.221	1268961	0.462	56	0	788722	0.0127185	0.18971		6307	0	0	0	0	0	0	0	334.449	1.00909	717.338	52754.7	23168.2	20.9601	74.9442	0	548.718	422.795	5.88064e+06
81	2009	2015	1	0	0	0.265596	6.36275	8.53159	111.902	1303156	0.394	56	0	967334	0.0131594	0.188331		10642	0	0	0	0	0	0	0	404.53	1.01127	694.423	55218.9	26222.7	21.7966	79.7971	0	597.015	500.241	5.44026e+06
81	2010	2015	1	0	0	0.261458	6.363	9.03657	113.432	1673848	0.448	56	0	1.01789e+06	0.0130497	0.175949		15648	0	0	0	0	0	0	0	453.781	1.01065	741.85	64029.4	28720.6	22.5665	84.324	0	703.665	568.741	7.03306e+06
81	2011	2015	1	0	0	0.26709	6.36238	9.55678	112.374	2209185	0.493	56	0	1.29266e+06	0.0141463	0.184687		21352.6	0	0	0	0	0	0	0	537.299	1.00888	743.569	75882.7	32145	24.2132	93.1664	2.18593e+06	806.969	639.637	7.18408e+06
81	2012	2015	1	0	0	0.266736	6.37823	10.0579	110.769	2682518	0.499	56	0	1.52256e+06	0.0146282	0.201541		30176.8	0	0	0	0	0	0	0	602.098	1.01075	791.278	86874.7	34629.8	26.4125	102.345	2.49915e+06	862.677	693.859	7.25244e+06
81	2013	2015	1	0	0	0.28564	6.40233	10.5796	109.596	3339310	0.516	56	0	1.7587e+06	0.0154208	0.186375		44354.2	0	0	0	0	0	0	0	696.352	1.00836	852.035	95421	37252.1	30.2453	116.211	2.84314e+06	902.384	777.188	7.44149e+06
81	2014	2015	1	0	0	0.276394	6.45332	11.0888	108.165	4021829	0.561	56	0	1.91021e+06	0.0162252	0.178112		62707.8	0	0	0	0	0	0	0	758.307	1.00944	880.639	100278	39517.6	30.7268	120.152	2.92794e+06	922.575	861.239	7.5993e+06
81	2015	2015	1	1	1	0.293633	6.50189	11.6041	107.591	4235687	0.539	56	0	2.06468e+06	0.0147798	0.177048		88305.4	0	0	0	0	0	0	0	819.73	1.01161	858.07	93665.4	43138.7	32.28	128.96	3.37529e+06	917.443	944.597	7.16127e+06
81	2016	2015	1	1	1	0.276313	6.54838	12.0859	107.104	4036811	0.533	56	0	2.15635e+06	0.0162098	0.175976		59203.2	0	0	0	0	0	0	0	1012.29	1.00737	894.418	98799.9	46281.5	31.3048	128.947	3.58588e+06	931.577	1028.87	6.74937e+06
81	2017	2015	1	1	1	0.289615	6.53029	12.6064	0	4.74641e+06	0.594764	56	0	2.39623e+06	0.0166863	0.177294		78814.9	0	0	0	0	0	0	0	995.261	1.00906	938.92	114374	48587.5	34.3449	140.074	4.38781e+06	1064.69	1081.15	7.73916e+06
81	2018	2015	1	1	1	0.293083	6.55382	13.1147	0	5.13646e+06	0.616255	56	0	2.57484e+06	0.0171271	0.175915		86710.2	0	0	0	0	0	0	0	1068.1	1.00894	967.754	121274	51382.3	35.8468	147.353	4.86891e+06	1118.75	1153.79	7.9181e+06
81	2019	2015	1	1	1	0.296551	6.57734	13.6229	0	5.5265e+06	0.637745	56	0	2.75345e+06	0.017568	0.174535		94605.5	0	0	0	0	0	0	0	1140.94	1.00881	996.588	128175	54177.2	37.3487	154.631	5.35002e+06	1172.81	1226.43	8.09704e+06
82	2000	2015	1	0	0	0.230664	6.13042	3.27743	4.78872e+06	0	0.379977	416.978	0.037318	9000	0.0091916	0.200747		0	10271.1	90572.5	1.26821e+06	13196.5	79.549	103.925	46.2109	0	1.03108	448.747	0	1074.79	8.81297	16.3446	0	145.66	0	4.6972e+06
82	2001	2015	1	0	0	0.234132	6.15394	3.73895	4.43401e+06	0	0.389536	419.543	0.107842	9000	0.00963246	0.199367		0	10003.1	87505.6	1.27285e+06	15020.2	79.4294	96.8013	49.0163	0	1.0293	477.581	3972.74	3869.65	10.3149	23.6229	0	199.72	0	4.87613e+06
82	2002	2015	1	0	0	0.2376	6.17747	4.20047	4.07929e+06	0	0.399095	422.107	0.178366	9000	0.0100733	0.197988		0	9735.21	84438.6	1.2775e+06	16844	79.3098	89.6775	51.8216	0	1.02752	506.414	10872.8	6664.52	11.8167	30.9011	0	253.781	0	5.05507e+06
82	2003	2015	1	0	0	0.241067	6.20099	4.662	3.72458e+06	0	0.408654	424.672	0.248891	9000	0.0105142	0.196608		0	9467.28	81371.7	1.28215e+06	18667.7	79.1902	82.5536	54.627	0	1.02575	535.248	17772.9	9459.38	13.3186	38.1793	0	307.842	64.1668	5.23401e+06
82	2004	2015	1	0	0	0.244535	6.22451	5.12352	3.36987e+06	60030.9	0.418213	427.236	0.319415	9000	0.0109551	0.195229		0	9199.35	78304.8	1.2868e+06	20491.4	79.0706	75.4298	57.4323	48.3346	1.02397	564.082	24673	12254.2	14.8205	45.4575	0	361.902	136.808	5.41295e+06
82	2005	2015	1	0	0	0.248003	6.24803	5.58504	3.01516e+06	150311	0.427772	429.801	0.389939	9000	0.0113959	0.193849		9061.56	8931.41	75237.8	1.29144e+06	22315.1	78.951	68.306	60.2376	121.175	1.0222	592.915	31573.1	15049.1	16.3224	52.7358	0	415.963	209.449	5.59189e+06
82	2006	2015	1	0	0	0.253169	6.29239	6.19538	113.307	235100	0.402	417.797	0.347571	9000	0.0118368	0.192469		35061.5	7984.18	69062.6	797507	28520.8	76.1273	45.0736	59.8051	245.178	0.973655	581.313	36324	17844	17.8242	60.014	0	470.024	282.091	5.77083e+06
82	2007	2015	1	0	0	0.250735	6.30615	6.69737	9.75467e+06	286200	0.376379	422.501	0.330949	9000	0.0122776	0.19109		43879.3	8517.05	67749.6	840498	24525.4	77.0793	50.0784	65.4194	276.387	1.01308	670.163	43462.3	21081	20.34	71.5942	0	480.548	379.017	5.80806e+06
82	2008	2015	1	0	0	0.260135	6.30996	6.88233	112.221	381900	0.439	427.241	0.335398	9000	0.0127185	0.18971		54856.6	8134.07	63771.2	1.00161e+06	21683.4	78.7751	56.2903	69.1482	334.449	1.05126	717.338	52754.7	23168.2	20.9601	74.9442	0	548.718	422.795	5.88064e+06
82	2009	2015	1	0	0	0.265596	6.36275	7.02869	111.902	426300	0.441	430.016	0.999679	9000	0.0131594	0.188331		72444.9	7705.22	58580	1.03232e+06	18974.5	78.8716	59.3137	71.8611	404.53	1.02076	694.423	55218.9	26222.7	21.7966	79.7971	0	597.015	500.241	5.44026e+06
82	2010	2015	1	0	0	0.261458	6.363	7.83176	113.432	545300	0.504	435.911	0.99299	9000	0.0130497	0.175949		89042.4	7935.92	59520	1.22768e+06	18776.1	82.141	70.4389	77.0939	453.781	1.02607	741.85	64029.4	28720.6	22.5665	84.324	0	703.665	568.741	7.03306e+06
82	2011	2015	1	0	0	0.26709	6.36238	8.65565	112.374	778900	0.59	550.873	0.990383	9000	0.0141463	0.184687		99551.2	7734.08	65414.5	2.60249e+06	51294.5	76.5802	0	79.3297	537.299	1.00017	743.569	75882.7	32145	24.2132	93.1664	2.18593e+06	806.969	639.637	7.18408e+06
82	2012	2015	1	0	0	0.266736	6.37823	8.72794	110.769	959700	0.607	441.512	0.990127	9000	0.0146282	0.201541		121777	7274.26	59491.8	2.26928e+06	48979.9	78.3541	0	83.5111	602.098	1.0482	791.278	86874.7	34629.8	26.4125	102.345	2.49915e+06	862.677	693.859	7.25244e+06
82	2013	2015	1	0	0	0.28564	6.40233	9.22204	109.596	1122500	0.605	441.241	0.992699	9000	0.0154208	0.186375		143483	7086.1	53915.9	2.3351e+06	38751.7	81.4615	0	74.6039	696.352	1.00718	852.035	95421	37252.1	30.2453	116.211	2.84314e+06	902.384	777.188	7.44149e+06
82	2014	2015	1	0	0	0.276394	6.45332	9.64711	108.165	920700	0.476	445.286	0.990786	9000	0.0162252	0.178112		162107	6782.45	55073	2.40613e+06	43354.9	82.5167	0	89.8465	758.307	1.03062	880.639	100278	39517.6	30.7268	120.152	2.92794e+06	922.575	861.239	7.5993e+06
82	2015	2015	1	1	1	0.293633	6.50189	10.082	107.591	948600	0.455	444.56	0.99673	9000	0.0147798	0.177048		179568	6572.47	48701.5	0	48312.2	80.1238	0	90.4455	819.73	0.987802	858.07	93665.4	43138.7	32.28	128.96	3.37529e+06	917.443	944.597	7.16127e+06
82	2016	2015	1	1	1	0.276313	6.54838	10.9258	107.104	1006700	0.441	440.133	0.97661	9000	0.0162098	0.175976		191845	4836.31	23918.7	0	22658.6	68.5373	0	86.7022	1012.29	0.968207	894.418	98799.9	46281.5	31.3048	128.947	3.58588e+06	931.577	1028.87	6.74937e+06
82	2017	2015	1	1	1	0.289615	6.53029	11.1233	0	1.23367e+06	0.542479	460.576	1.23623	9000	0.0166863	0.177294		207959	5716.24	38434.7	1.34721e+06	44199.8	77.5159	0	93.9017	995.261	1.00089	938.92	114374	48587.5	34.3449	140.074	4.38781e+06	1064.69	1081.15	7.73916e+06
82	2018	2015	1	1	1	0.293083	6.55382	11.5848	0	1.32395e+06	0.552038	463.14	1.30675	9000	0.0171271	0.175915		224534	5448.31	35367.7	1.35186e+06	46023.5	77.3963	0	96.7071	1068.1	0.999118	967.754	121274	51382.3	35.8468	147.353	4.86891e+06	1118.75	1153.79	7.9181e+06
82	2019	2015	1	1	1	0.296551	6.57734	12.0464	0	1.41423e+06	0.561597	465.705	1.37728	9000	0.017568	0.174535		241109	5180.38	32300.8	1.35651e+06	47847.2	77.2767	0	99.5124	1140.94	0.997342	996.588	128175	54177.2	37.3487	154.631	5.35002e+06	1172.81	1226.43	8.09704e+06
83	2000	2015	1	0	0	0.230664	6.13042	3.96643	4.78872e+06	0	0.245515	172.004	0.940693	0	0.00533933	0.0595907		0	10082	250200	2.48381e+06	240093	443.76	0	0	0	1.01122	448.747	0	0	0	0	0	0	0	0
83	2001	2015	1	0	0	0.234132	6.15394	4.47466	4.43401e+06	0	0.263412	171.937	0.94454	0	0.00516846	0.0657836		0	9452	235350	2.33632e+06	226491	417.78	0	0	0	1.0111	477.581	3972.74	0	0	0	0	0	0	0
83	2002	2015	1	0	0	0.2376	6.17747	4.9829	4.07929e+06	0	0.281309	171.87	0.948388	0	0.00499758	0.0719764		0	8822	220499	2.18883e+06	212890	391.8	0	0	0	1.01097	506.414	10872.8	0	0	0	0	0	0	0
83	2003	2015	1	0	0	0.241067	6.20099	5.49113	3.72458e+06	0	0.299206	171.803	0.952236	0	0.0048267	0.0781693		0	8192	205648	2.04135e+06	199288	365.82	0	0	0	1.01084	535.248	17772.9	0	0	0	0	0	0	0
[truncated: 33,216 more rows]
